# Supplementary material for: LuxHMM: DNA methylation analysis with genome segmentation via hidden Markov model
Source: BMC Bioinformatics. 2023 Feb 22;24:58. doi: 10.1186/s12859-023-05174-7 (PMC9945676; doi:10.1186/s12859-023-05174-7)
Supplement: Supplementary file 2 — Additional file 2: Enriched GO terms using Mouse Phenotype [file 12859_2023_5174_MOESM2_ESM.xlsx]

## Sheet: luxhmm
# Enriched GO terms using Mouse Phenotype
# GREAT version 4.0.4	Species assembly: mm9	Association rule: Basal+extension: 5000 bp upstream, 1000 bp downstream, 1000000 bp max extension, curated regulatory domains included
# Ontology summary statistics are provided in the footer.
#
# Ontology	ID	Desc	BinomRank	BinomP	BinomBonfP	BinomFdrQ	RegionFoldEnrich	ExpRegions	ObsRegions	GenomeFrac	SetCov	HyperRank	HyperP	HyperBonfP	HyperFdrQ	GeneFoldEnrich	ExpGenes	ObsGenes	TotalGenes	GeneSetCov	TermCov	Regions	Genes
Mouse Phenotype	MP:0002206	abnormal CNS synaptic transmission	1	1.56959e-69	1.48326e-65	1.48326e-65	1.53277	1126.06	1726	0.0975283	0.149489	2	1.01529e-41	9.59454e-38	4.79727e-38	1.66594	255.112	425	667	0.0555701	0.637181	unnamed,unnamed,unnamed,unnamed,unnamed,unnamed,unnamed,unnamed,unnamed,unnamed,unnamed,unnamed,unnamed,unnamed,unnamed,unnamed,unnamed,unnamed,unnamed,unnamed,unnamed,unnamed,unnamed,unnamed,unnamed,unnamed,unnamed,unnamed,unnamed,unnamed,unnamed,unnamed,unnamed,unnamed,unnamed,unnamed,unnamed,unnamed,unnamed,unnamed,unnamed,unnamed,unnamed,unnamed,unnamed,unnamed,unnamed,unnamed,unnamed,unnamed…	Acot7,Acvr1b,Adarb1,Adcy1,Adcyap1r1,Add2,Adgrb3,Adk,Adora1,Adra1d,Adra2a,Aff2,Agrn,Akap5,Anks1b,Ap3m2,Apba1,Apba2,App,Arc,Arhgap32,Arhgef6,Arhgef9,Arpc3,Arrb1,Asic1,Atp1a3,Atp2a2,Atp2b2,Atp6v1c1,Atxn1,Avpr1a,B3gat1,Baiap2,Bcan,Bcl11a,Bdnf,Bend3,Bsn,Btbd9,C1qa,C1ql1,C9,Cacna1a,Cacna1b,Cacna2d1,Cacna2d2,Cacnb3,Cacnb4,Cacng2,Cacng3,Cacng4,Cacng8,Cadps,Cadps2,Calb2,Camk2a,Camk2b,Camk4,Camkk2,Caprin1,…
Mouse Phenotype	MP:0003635	abnormal synaptic transmission	2	6.66195e-67	6.29554e-63	3.14777e-63	1.48454	1273.12	1890	0.110265	0.163693	1	2.23262e-44	2.10982e-40	2.10982e-40	1.64402	289.535	476	757	0.0622385	0.628798	unnamed,unnamed,unnamed,unnamed,unnamed,unnamed,unnamed,unnamed,unnamed,unnamed,unnamed,unnamed,unnamed,unnamed,unnamed,unnamed,unnamed,unnamed,unnamed,unnamed,unnamed,unnamed,unnamed,unnamed,unnamed,unnamed,unnamed,unnamed,unnamed,unnamed,unnamed,unnamed,unnamed,unnamed,unnamed,unnamed,unnamed,unnamed,unnamed,unnamed,unnamed,unnamed,unnamed,unnamed,unnamed,unnamed,unnamed,unnamed,unnamed,unnamed…	Acot7,Acvr1b,Adarb1,Adcy1,Adcyap1r1,Add2,Adgrb3,Adgrl1,Adk,Adora1,Adra1d,Adra2a,Adra2c,Aff2,Agrn,Akap5,Anks1b,Ap3m2,Apba1,Apba2,Aplp2,App,Arc,Arhgap32,Arhgef6,Arhgef9,Arpc3,Arpp21,Arrb1,Asic1,Atp1a3,Atp2a2,Atp2b2,Atp6v1c1,Atxn1,Avpr1a,B3gat1,Baiap2,Bcan,Bcl11a,Bdnf,Bend3,Bsn,Btbd9,C1qa,C1ql1,C9,Cacna1a,Cacna1b,Cacna1e,Cacna1h,Cacna2d1,Cacna2d2,Cacnb3,Cacnb4,Cacng2,Cacng3,Cacng4,Cacng8,Cadps,Cadps…
Mouse Phenotype	MP:0004859	abnormal synaptic plasticity	3	4.84455e-57	4.5781e-53	1.52603e-53	2.74191	121.448	333	0.0105186	0.0288412	165	4.68919e-11	4.43128e-07	2.68563e-09	1.99722	27.5383	55	72	0.00719142	0.763889	unnamed,unnamed,unnamed,unnamed,unnamed,unnamed,unnamed,unnamed,unnamed,unnamed,unnamed,unnamed,unnamed,unnamed,unnamed,unnamed,unnamed,unnamed,unnamed,unnamed,unnamed,unnamed,unnamed,unnamed,unnamed,unnamed,unnamed,unnamed,unnamed,unnamed,unnamed,unnamed,unnamed,unnamed,unnamed,unnamed,unnamed,unnamed,unnamed,unnamed,unnamed,unnamed,unnamed,unnamed,unnamed,unnamed,unnamed,unnamed,unnamed,unnamed…	Adcy1,Add2,Adk,Akap5,Anks1b,Arhgef9,Bdnf,Btbd9,Camk2a,Camk2b,Cdk5r1,Clcn3,Clip2,Cnr1,Cplx2,Dbn1,Dlg4,Dpysl4,Drd1,Elfn1,Esr2,Gabbr2,Gria1,Gria2,Gria3,Grin1,Grin2b,Grn,Itga8,Ksr1,Lrfn2,Map6,Mbnl2,Nlgn3,Nrgn,Nrp2,Ntrk2,Pick1,Pip5k1c,Plat,Prrt2,Psen1,Rasgrf1,Rbfox3,Rims1,Shank3,Slc8a2,Srcin1,Stx1a,Syngap1,Syngr1,Syp,Thrb,Uchl1,Vldlr
Mouse Phenotype	MP:0000787	abnormal telencephalon morphology	4	2.59956e-56	2.45659e-52	6.14147e-53	1.43118	1321.98	1892	0.114497	0.163866	3	8.32283e-35	7.86508e-31	2.62169e-31	1.53362	324.723	498	849	0.0651151	0.586572	unnamed,unnamed,unnamed,unnamed,unnamed,unnamed,unnamed,unnamed,unnamed,unnamed,unnamed,unnamed,unnamed,unnamed,unnamed,unnamed,unnamed,unnamed,unnamed,unnamed,unnamed,unnamed,unnamed,unnamed,unnamed,unnamed,unnamed,unnamed,unnamed,unnamed,unnamed,unnamed,unnamed,unnamed,unnamed,unnamed,unnamed,unnamed,unnamed,unnamed,unnamed,unnamed,unnamed,unnamed,unnamed,unnamed,unnamed,unnamed,unnamed,unnamed…	Abca1,Abi2,Abl1,Abl2,Adamts3,Adcy1,Adcy3,Adgrg1,Aga,Agt,Agtpbp1,Akt3,Ank2,Ank3,Ap3b1,Ap3m2,Apaf1,Apbb1,Apbb2,Apc,Apc2,App,Arfgef2,Arhgap33,Arhgap5,Arl6,Arpc3,Arsg,Ascl1,Atg7,Atp1a3,Atp2b2,Atrn,Atxn1,B4galt2,B9d1,Bad,Basp1,Bcan,Bcl2l1,Bcl2l11,Bdnf,Bhlhe22,Bid,Brinp1,Brsk2,Btg1,C1qa,Cables1,Cacng2,Cacng8,Cadm1,Cadps,Cd40lg,Cd81,Cdc42,Cdh2,Cdk5r1,Cdk5r2,Cdk5rap2,Cdon,Celsr2,Celsr3,Cep120,Cers6,Cfap5…
Mouse Phenotype	MP:0008415	abnormal neurite morphology	5	1.22578e-55	1.15836e-51	2.31672e-52	1.63721	673.097	1102	0.058297	0.0954443	32	9.38687e-21	8.8706e-17	2.77206e-18	1.57112	166.76	262	436	0.0342573	0.600917	unnamed,unnamed,unnamed,unnamed,unnamed,unnamed,unnamed,unnamed,unnamed,unnamed,unnamed,unnamed,unnamed,unnamed,unnamed,unnamed,unnamed,unnamed,unnamed,unnamed,unnamed,unnamed,unnamed,unnamed,unnamed,unnamed,unnamed,unnamed,unnamed,unnamed,unnamed,unnamed,unnamed,unnamed,unnamed,unnamed,unnamed,unnamed,unnamed,unnamed,unnamed,unnamed,unnamed,unnamed,unnamed,unnamed,unnamed,unnamed,unnamed,unnamed…	Aatk,Abcd2,Adgrg6,Aga,Agrn,Agtpbp1,Ank2,Ank3,Arhgap33,Arhgef15,Arhgef6,Arpc3,Arsa,Atg7,Atxn1,Basp1,Bcl11a,Bdnf,Brd7,C1qa,Cacna1a,Cacna2d2,Cadm4,Cadps,Cadps2,Camk1g,Camk2a,Camk4,Camkk1,Camkk2,Caprin1,Cd47,Cdc42,Cend1,Cers1,Chl1,Chst14,Ckap5,Clcn2,Clcn6,Cldn11,Clstn1,Cnp,Cntn1,Cpeb3,Cpeb4,Cpt1c,Crmp1,Csf1,Ctnnb1,Cyfip2,Dab2ip,Dact1,Dag1,Dbn1,Dclk1,Dlg1,Dlg3,Dlg4,Dnm1,Dpysl2,Dpysl5,Dst,Dusp1,Dync1li…
Mouse Phenotype	MP:0011110	preweaning lethality, incomplete penetrance	6	2.71824e-54	2.56874e-50	4.28123e-51	1.69032	572.082	967	0.0495481	0.083752	112	2.08467e-13	1.97001e-09	1.75894e-11	1.42965	179.764	257	470	0.0336036	0.546809	unnamed,unnamed,unnamed,unnamed,unnamed,unnamed,unnamed,unnamed,unnamed,unnamed,unnamed,unnamed,unnamed,unnamed,unnamed,unnamed,unnamed,unnamed,unnamed,unnamed,unnamed,unnamed,unnamed,unnamed,unnamed,unnamed,unnamed,unnamed,unnamed,unnamed,unnamed,unnamed,unnamed,unnamed,unnamed,unnamed,unnamed,unnamed,unnamed,unnamed,unnamed,unnamed,unnamed,unnamed,unnamed,unnamed,unnamed,unnamed,unnamed,unnamed…	3110079O15Rik,Abca1,Abcb11,Abi3bp,Actn4,Adam10,Adamts9,Adcy9,Adcyap1,Adcyap1r1,Aff1,Agap1,Agps,Akap10,Aldob,Ank1,Anp32e,Apbb2,App,Arhgap33,Arhgef1,Arhgef11,Arhgef12,Arhgef15,Arl8b,Armc7,Atf6b,Atp2b1,Atp5g2,Atp8b2,Bach1,Baiap2,Bicdl1,Boc,Brms1,Bscl2,Cacna1a,Cacna1b,Cap2,Capn7,Casc3,Caskin1,Catsperz,Cavin1,Cdh5,Cdk4,Cdon,Chd2,Chd7,Chic2,Chn1,Chrnb2,Ckap4,Clec16a,Cnr1,Cntn1,Col1a1,Col4a3bp,Crebbp,Cr…
Mouse Phenotype	MP:0008540	abnormal cerebral hemisphere morphology	7	3.15444e-53	2.98095e-49	4.2585e-50	1.48791	1020.22	1518	0.0883614	0.131474	8	2.64918e-29	2.50347e-25	3.12934e-26	1.56626	243.255	381	636	0.0498169	0.599057	unnamed,unnamed,unnamed,unnamed,unnamed,unnamed,unnamed,unnamed,unnamed,unnamed,unnamed,unnamed,unnamed,unnamed,unnamed,unnamed,unnamed,unnamed,unnamed,unnamed,unnamed,unnamed,unnamed,unnamed,unnamed,unnamed,unnamed,unnamed,unnamed,unnamed,unnamed,unnamed,unnamed,unnamed,unnamed,unnamed,unnamed,unnamed,unnamed,unnamed,unnamed,unnamed,unnamed,unnamed,unnamed,unnamed,unnamed,unnamed,unnamed,unnamed…	Abca1,Abi2,Abl1,Abl2,Adcy1,Adgrg1,Aga,Agt,Agtpbp1,Akt3,Ank2,Ank3,Ap3b1,Ap3m2,Apaf1,Apbb1,Apbb2,Apc2,App,Arfgef2,Arhgap33,Arhgap5,Arl6,Arpc3,Arsg,Atg7,Atp1a3,Atp2b2,Atrn,B4galt2,Bad,Basp1,Bcan,Bcl2l11,Bdnf,Bhlhe22,Bid,Brinp1,Brsk2,Btg1,C1qa,Cables1,Cacng2,Cacng8,Cadm1,Cadps,Cd40lg,Cd81,Cdc42,Cdh2,Cdk5r1,Cdk5r2,Cdk5rap2,Cdon,Celsr3,Cep120,Cers6,Cfap54,Chd7,Chek2,Chl1,Chn1,Chn2,Chrm1,Cit,Ckap5,Ckb,C…
Mouse Phenotype	MP:0004753	abnormal miniature excitatory postsynaptic currents	8	9.70121e-53	9.16765e-49	1.14596e-49	2.26981	192.527	437	0.0166748	0.0378486	120	3.79184e-13	3.58329e-09	2.98607e-11	1.89494	41.6899	79	109	0.0103295	0.724771	unnamed,unnamed,unnamed,unnamed,unnamed,unnamed,unnamed,unnamed,unnamed,unnamed,unnamed,unnamed,unnamed,unnamed,unnamed,unnamed,unnamed,unnamed,unnamed,unnamed,unnamed,unnamed,unnamed,unnamed,unnamed,unnamed,unnamed,unnamed,unnamed,unnamed,unnamed,unnamed,unnamed,unnamed,unnamed,unnamed,unnamed,unnamed,unnamed,unnamed,unnamed,unnamed,unnamed,unnamed,unnamed,unnamed,unnamed,unnamed,unnamed,unnamed…	Adcy1,Arc,Btbd9,C1qa,Cacna1a,Cacna1b,Cacng2,Cacng3,Cacng8,Cadps,Cadps2,Caprin1,Cd44,Chrm1,Clstn3,Cnih2,Cnih3,Cplx2,Cyfip2,Dact1,Dnm1,Dnm3,Doc2a,Emx1,Epha4,Ext1,Gria1,Grin1,Grin2a,Grin2b,Homer1,Kalrn,Lgi1,Lrfn2,Lrrtm4,Lzts1,Madd,Mapk8ip2,Mapt,Nbea,Nlgn3,Npas4,Nptn,Nr3c2,Nrn1,Nrxn3,Pacsin1,Pfn2,Pip5k1c,Plppr4,Ppp1r9a,Prrt2,Pten,Rbfox3,Rnf112,Rps6ka5,Scn1a,Sh3gl2,Sh3gl3,Shank2,Shank3,Slc12a5,Slc17a7…
Mouse Phenotype	MP:0001516	abnormal motor coordination/ balance	9	1.367e-49	1.29182e-45	1.43535e-46	1.41283	1266.25	1789	0.10967	0.154945	10	6.67261e-28	6.30561e-24	6.30561e-25	1.47259	326.635	481	854	0.0628923	0.563232	unnamed,unnamed,unnamed,unnamed,unnamed,unnamed,unnamed,unnamed,unnamed,unnamed,unnamed,unnamed,unnamed,unnamed,unnamed,unnamed,unnamed,unnamed,unnamed,unnamed,unnamed,unnamed,unnamed,unnamed,unnamed,unnamed,unnamed,unnamed,unnamed,unnamed,unnamed,unnamed,unnamed,unnamed,unnamed,unnamed,unnamed,unnamed,unnamed,unnamed,unnamed,unnamed,unnamed,unnamed,unnamed,unnamed,unnamed,unnamed,unnamed,unnamed…	3110043O21Rik,Aaas,Abcd2,Abl1,Abl2,Abr,Acot7,Adam11,Adam22,Adamts7,Adarb1,Adcy5,Adgrg6,Adra1d,Aff1,Afg3l1,Aga,Agrn,Agtpbp1,Akap5,Alpl,Ank1,Ank2,Ank3,Ankfn1,Anp32e,Apba1,Apba2,Apc2,Aplp2,App,Arhgap10,Arhgap32,Arntl,Arsa,Astn1,Atf2,Atg7,Atp1a3,Atp2a2,Atp2b2,Atp6v0a4,Atp8a2,Atxn1,Atxn2,Auts2,Avil,B3galt2,B4galnt1,B4galt2,Barhl2,Bcr,Bdnf,Bhlhe22,Bid,Bmp7,Brinp1,Bsn,Cacna1a,Cacna1g,Cacna1i,Cacna2d2,Ca…
Mouse Phenotype	MP:0003492	abnormal involuntary movement	10	2.34635e-49	2.21731e-45	2.21731e-46	1.38785	1398.57	1941	0.12113	0.16811	4	5.03119e-32	4.75448e-28	1.18862e-28	1.47993	364.883	540	954	0.0706067	0.566038	unnamed,unnamed,unnamed,unnamed,unnamed,unnamed,unnamed,unnamed,unnamed,unnamed,unnamed,unnamed,unnamed,unnamed,unnamed,unnamed,unnamed,unnamed,unnamed,unnamed,unnamed,unnamed,unnamed,unnamed,unnamed,unnamed,unnamed,unnamed,unnamed,unnamed,unnamed,unnamed,unnamed,unnamed,unnamed,unnamed,unnamed,unnamed,unnamed,unnamed,unnamed,unnamed,unnamed,unnamed,unnamed,unnamed,unnamed,unnamed,unnamed,unnamed…	2700060E02Rik,Abcd2,Abl2,Actg1,Adcy1,Adipor2,Adra1d,Adra2a,Adra2c,Aebp2,Afap1l2,Agap1,Agrn,Agtpbp1,Ajap1,Ank1,Ank3,Ankfn1,Ankrd1,Ankrd11,Anp32e,Ap2a2,Aplp2,App,Arhgap32,Arhgef4,Arntl,Arsa,Ass1,Atf2,Atg7,Atn1,Atp1a3,Atp2a2,Atp2b2,Atp6v0a4,Atp8a2,Atrn,Atxn1,Auts2,Avil,B3galt2,B4galnt1,B4galnt2,B9d1,Bag3,Barhl1,Bdnf,Bend3,Bmp4,Bmp7,Brd7,Brsk2,Bsn,Btg2,Cacna1a,Cacna1b,Cacna1d,Cacna1g,Cacna1i,Cacna1s,…
Mouse Phenotype	MP:0002910	abnormal excitatory postsynaptic currents	11	9.38951e-49	8.87309e-45	8.06645e-46	1.98152	278.069	551	0.0240836	0.0477221	36	5.10383e-20	4.82312e-16	1.33975e-17	1.97906	55.0766	109	144	0.0142521	0.756944	unnamed,unnamed,unnamed,unnamed,unnamed,unnamed,unnamed,unnamed,unnamed,unnamed,unnamed,unnamed,unnamed,unnamed,unnamed,unnamed,unnamed,unnamed,unnamed,unnamed,unnamed,unnamed,unnamed,unnamed,unnamed,unnamed,unnamed,unnamed,unnamed,unnamed,unnamed,unnamed,unnamed,unnamed,unnamed,unnamed,unnamed,unnamed,unnamed,unnamed,unnamed,unnamed,unnamed,unnamed,unnamed,unnamed,unnamed,unnamed,unnamed,unnamed…	Adcy1,Adora1,Anks1b,Apba1,Apba2,Bcl11a,C1qa,Cacna1a,Cacng2,Cacng3,Cacng4,Cacng8,Cadps,Cadps2,Camk2a,Camk4,Cbln1,Cckbr,Chrm1,Chrna2,Clcn3,Clstn1,Cplx2,Cspg5,Dagla,Dlg2,Dlg3,Dnm1,Dnm3,Dscaml1,Elfn1,Emx1,Eps8,Ext1,Fgf13,Fstl1,Gabbr1,Gabbr2,Gabrd,Gad2,Gria2,Grid2,Grik4,Grik5,Grin1,Grin2a,Grin2b,Grm1,Grm7,Igsf11,Inpp4a,Itpr1,Kalrn,Kcnj10,Lep,Lin7a,Lrfn2,Lzts1,Madd,Mapk8ip2,Napa,Napb,Nbea,Neto1,Nlgn1,N…
Mouse Phenotype	MP:0008143	abnormal dendrite morphology	12	3.11897e-48	2.94743e-44	2.45619e-45	1.89217	325.024	615	0.0281503	0.0532652	101	7.5589e-14	7.14316e-10	7.07244e-12	1.66724	79.1726	132	207	0.0172594	0.637681	unnamed,unnamed,unnamed,unnamed,unnamed,unnamed,unnamed,unnamed,unnamed,unnamed,unnamed,unnamed,unnamed,unnamed,unnamed,unnamed,unnamed,unnamed,unnamed,unnamed,unnamed,unnamed,unnamed,unnamed,unnamed,unnamed,unnamed,unnamed,unnamed,unnamed,unnamed,unnamed,unnamed,unnamed,unnamed,unnamed,unnamed,unnamed,unnamed,unnamed,unnamed,unnamed,unnamed,unnamed,unnamed,unnamed,unnamed,unnamed,unnamed,unnamed…	Agtpbp1,Arhgap33,Arhgef15,Arhgef6,Arpc3,Atg7,Atxn1,Bdnf,Brd7,Cacna1a,Cadps2,Camk1g,Camk2a,Camk4,Camkk1,Camkk2,Caprin1,Cd47,Cend1,Cers1,Ckap5,Clstn1,Cntn1,Cpeb3,Cpeb4,Cpt1c,Crmp1,Ctnnb1,Cyfip2,Dab2ip,Dact1,Dbn1,Dlg1,Dlg4,Dnm1,Dpysl2,Dpysl5,Dusp1,Dync1li1,Elfn1,Emx1,En1,Fos,Foxo6,Gas1,Gnb5,Gria1,Grid2,Grik4,Grin2b,Grn,Homer1,Itpr1,Kalrn,Kcnj6,Kidins220,Kif14,Lrfn2,Lrp1,Lrrc7,Lrrk2,Lrrtm1,Lzts1,Map1…
Mouse Phenotype	MP:0001900	impaired synaptic plasticity	13	4.93956e-47	4.66789e-43	3.59068e-44	3.04982	75.7423	231	0.00656005	0.0200069	237	3.94239e-09	3.72556e-05	1.57197e-07	2.08096	18.7414	39	49	0.00509937	0.795918	unnamed,unnamed,unnamed,unnamed,unnamed,unnamed,unnamed,unnamed,unnamed,unnamed,unnamed,unnamed,unnamed,unnamed,unnamed,unnamed,unnamed,unnamed,unnamed,unnamed,unnamed,unnamed,unnamed,unnamed,unnamed,unnamed,unnamed,unnamed,unnamed,unnamed,unnamed,unnamed,unnamed,unnamed,unnamed,unnamed,unnamed,unnamed,unnamed,unnamed,unnamed,unnamed,unnamed,unnamed,unnamed,unnamed,unnamed,unnamed,unnamed,unnamed…	Adcy1,Add2,Anks1b,Bdnf,Camk2a,Cdk5r1,Clcn3,Clip2,Cplx2,Dbn1,Dpysl4,Elfn1,Gria1,Gria2,Grin1,Grin2b,Grn,Itga8,Ksr1,Map6,Mbnl2,Nlgn3,Nrgn,Ntrk2,Pick1,Pip5k1c,Plat,Psen1,Rasgrf1,Rbfox3,Rims1,Shank3,Srcin1,Stx1a,Syngap1,Syngr1,Syp,Thrb,Vldlr
Mouse Phenotype	MP:0002064	seizures	14	7.17594e-47	6.78126e-43	4.84376e-44	1.63946	566.041	928	0.0490249	0.0803742	28	1.19377e-21	1.12811e-17	4.02898e-19	1.62142	148.018	240	387	0.0313807	0.620155	unnamed,unnamed,unnamed,unnamed,unnamed,unnamed,unnamed,unnamed,unnamed,unnamed,unnamed,unnamed,unnamed,unnamed,unnamed,unnamed,unnamed,unnamed,unnamed,unnamed,unnamed,unnamed,unnamed,unnamed,unnamed,unnamed,unnamed,unnamed,unnamed,unnamed,unnamed,unnamed,unnamed,unnamed,unnamed,unnamed,unnamed,unnamed,unnamed,unnamed,unnamed,unnamed,unnamed,unnamed,unnamed,unnamed,unnamed,unnamed,unnamed,unnamed…	Adam22,Adarb1,Adk,Adora1,Adora2b,Adra2a,Akap5,Akt3,Alpl,Amph,Ank3,Ap3m2,Apc2,Arhgap32,Atp1a3,Atrn,B4galnt1,Bdnf,Bhlhe40,Bid,Bsn,C1qa,Cacna1a,Cacna1g,Cacna2d2,Cacnb4,Cacng2,Cacng4,Camk2a,Car7,Ccm2,Cdk5r1,Cdkn2a,Celf4,Cers1,Chn1,Chrna4,Chrnb2,Cit,Ckb,Clcn3,Cln8,Cnp,Cnr1,Cntn2,Cntn5,Cntnap2,Col1a1,Col4a1,Crebbp,Ctnnb1,Dclk2,Dgkd,Dnm1,Drd1,Dst,Elavl3,Elfn1,Eml1,Emx1,Faim2,Fgf13,Fosb,Foxa2,Fyn,Fzd9,Ga…
Mouse Phenotype	MP:0001393	ataxia	15	6.16595e-46	5.82682e-42	3.88455e-43	1.70531	467.363	797	0.0404784	0.0690282	134	2.17311e-12	2.05359e-08	1.53253e-10	1.49517	125.07	187	327	0.0244508	0.571865	unnamed,unnamed,unnamed,unnamed,unnamed,unnamed,unnamed,unnamed,unnamed,unnamed,unnamed,unnamed,unnamed,unnamed,unnamed,unnamed,unnamed,unnamed,unnamed,unnamed,unnamed,unnamed,unnamed,unnamed,unnamed,unnamed,unnamed,unnamed,unnamed,unnamed,unnamed,unnamed,unnamed,unnamed,unnamed,unnamed,unnamed,unnamed,unnamed,unnamed,unnamed,unnamed,unnamed,unnamed,unnamed,unnamed,unnamed,unnamed,unnamed,unnamed…	Abcd2,Adam22,Aff1,Aga,Agtpbp1,Ank3,Apba1,Apba2,Aplp2,App,Arhgap10,Arsa,Atf2,Atg7,Atp2b2,Atp8a2,Atxn1,B4galnt1,Bdnf,Bid,Bsn,Cacna1a,Cacna2d2,Cacnb4,Cacng2,Cacng3,Calb1,Camk2b,Camk4,Camta1,Cbln1,Ccm2,Cdh23,Cers1,Cit,Cln8,Cnp,Cntn1,Csf1r,Ctnna2,Dab1,Dao,Dcc,Dnm1,Dock3,Dst,E2f6,Egr3,En1,Epb41l3,Ercc3,F3,Fbxo41,Fdft1,Fgf12,Gal3st1,Galc,Gja1,Gjb1,Gjc2,Gldn,Glra1,Gnaq,Gnb5,Gpm6b,Gria3,Grid2,Grin1,Grm1,H…
Mouse Phenotype	MP:0003312	abnormal locomotor coordination	16	7.40025e-45	6.99324e-41	4.37077e-42	1.46051	958.571	1400	0.0830219	0.121254	65	3.85385e-16	3.64189e-12	5.60291e-14	1.39365	260.466	363	681	0.0474634	0.53304	unnamed,unnamed,unnamed,unnamed,unnamed,unnamed,unnamed,unnamed,unnamed,unnamed,unnamed,unnamed,unnamed,unnamed,unnamed,unnamed,unnamed,unnamed,unnamed,unnamed,unnamed,unnamed,unnamed,unnamed,unnamed,unnamed,unnamed,unnamed,unnamed,unnamed,unnamed,unnamed,unnamed,unnamed,unnamed,unnamed,unnamed,unnamed,unnamed,unnamed,unnamed,unnamed,unnamed,unnamed,unnamed,unnamed,unnamed,unnamed,unnamed,unnamed…	Abcd2,Abr,Adam22,Adgrg6,Aff1,Aga,Agrn,Agtpbp1,Ank,Ank3,Ankfn1,Apba1,Apba2,Apc2,Aplp2,App,Arhgap10,Arntl,Arsa,Arsb,Ass1,Atf2,Atg7,Atl1,Atn1,Atp1a3,Atp2b2,Atp8a2,Atrn,Atxn1,B4galnt1,Babam2,Bahcc1,Bcr,Bdnf,Bid,Bsn,Cacna1a,Cacna1b,Cacna2d2,Cacnb4,Cacng2,Cacng3,Calb1,Camk2b,Camk4,Camta1,Cast,Cbln1,Ccm2,Cdh23,Cdk4,Cend1,Cerk,Cers1,Cftr,Chd7,Chn1,Cit,Ciz1,Clcn3,Cldn19,Clic5,Cln8,Clstn3,Cmah,Cnp,Cntn1,Co…
Mouse Phenotype	MP:0001961	abnormal reflex	17	9.80532e-43	9.26603e-39	5.45061e-40	1.3943	1192.71	1663	0.103301	0.144033	12	1.37961e-26	1.30373e-22	1.08644e-23	1.48393	297.184	441	777	0.0576621	0.567568	unnamed,unnamed,unnamed,unnamed,unnamed,unnamed,unnamed,unnamed,unnamed,unnamed,unnamed,unnamed,unnamed,unnamed,unnamed,unnamed,unnamed,unnamed,unnamed,unnamed,unnamed,unnamed,unnamed,unnamed,unnamed,unnamed,unnamed,unnamed,unnamed,unnamed,unnamed,unnamed,unnamed,unnamed,unnamed,unnamed,unnamed,unnamed,unnamed,unnamed,unnamed,unnamed,unnamed,unnamed,unnamed,unnamed,unnamed,unnamed,unnamed,unnamed…	Abl2,Actg1,Adcy1,Adipor2,Adra1d,Adra2a,Adra2c,Aebp2,Afap1l2,Agap1,Agrn,Ajap1,Ankrd1,Ankrd11,Anp32e,Ap2a2,Aplp2,App,Arhgap32,Arhgef4,Arntl,Atg7,Atn1,Atp1a3,Atp2a2,Atp2b2,Atp6v0a4,Atp8a2,Atxn1,Auts2,Avil,B3galt2,B4galnt1,B4galnt2,B9d1,Barhl1,Bdnf,Bend3,Bmp4,Brsk2,Bsn,Btg2,Cacna1a,Cacna1b,Cacna1d,Cacna1i,Cacna1s,Cacna2d2,Cacna2d3,Cacnb4,Cacng2,Cadm4,Cadps2,Calb1,Camk4,Cast,Cck,Cckbr,Ccl2,Ccl3,Ccnd1,…
Mouse Phenotype	MP:0002915	abnormal synaptic depression	18	2.58963e-41	2.4472e-37	1.35956e-38	1.91227	267.221	511	0.0231441	0.0442577	53	4.63504e-17	4.38012e-13	8.26437e-15	1.93164	51.2518	99	134	0.0129446	0.738806	unnamed,unnamed,unnamed,unnamed,unnamed,unnamed,unnamed,unnamed,unnamed,unnamed,unnamed,unnamed,unnamed,unnamed,unnamed,unnamed,unnamed,unnamed,unnamed,unnamed,unnamed,unnamed,unnamed,unnamed,unnamed,unnamed,unnamed,unnamed,unnamed,unnamed,unnamed,unnamed,unnamed,unnamed,unnamed,unnamed,unnamed,unnamed,unnamed,unnamed,unnamed,unnamed,unnamed,unnamed,unnamed,unnamed,unnamed,unnamed,unnamed,unnamed…	Adgrb3,Adora1,Akap5,Anks1b,Arhgef6,Arhgef9,Bsn,C1ql1,Camk2a,Camk2b,Camk4,Cbln1,Cdk5r1,Chrm1,Chrm4,Cnr1,Cpeb3,Cspg5,Dagla,Disc1,Dpysl5,Efnb2,Elfn1,Emx1,Gnaq,Gria1,Gria2,Gria3,Grid2,Grin1,Grin2b,Grip1,Grip2,Grm1,Grm2,Gsk3a,Gsk3b,Iqsec1,Itpr1,Kcnma1,Lmx1b,Lrrc7,Mapt,Myo5a,Ncam1,Ncdn,Neurod6,Nlgn3,Nos1,Nr3c1,Nrgn,Nrxn2,Nrxn3,Pacsin1,Park7,Pcdh17,Pde4b,Pick1,Pip5k1c,Plat,Plcb4,Ppp1r9b,Ppp3r1,Prex1,Prk…
Mouse Phenotype	MP:0001765	abnormal ion homeostasis	19	5.46794e-40	5.1672e-36	2.71958e-37	1.52102	692.954	1054	0.0600168	0.091287	224	2.15904e-09	2.04029e-05	9.10845e-08	1.29894	240.195	312	628	0.040795	0.496815	unnamed,unnamed,unnamed,unnamed,unnamed,unnamed,unnamed,unnamed,unnamed,unnamed,unnamed,unnamed,unnamed,unnamed,unnamed,unnamed,unnamed,unnamed,unnamed,unnamed,unnamed,unnamed,unnamed,unnamed,unnamed,unnamed,unnamed,unnamed,unnamed,unnamed,unnamed,unnamed,unnamed,unnamed,unnamed,unnamed,unnamed,unnamed,unnamed,unnamed,unnamed,unnamed,unnamed,unnamed,unnamed,unnamed,unnamed,unnamed,unnamed,unnamed…	2010300C02Rik,A1cf,Abcb10,Abcb11,Abcc4,Aco1,Acvr1b,Adcy3,Adcy9,Add2,Adgrb1,Adgrf5,Agt,Ajap1,Alb,Aldh1b1,Alk,Ank,Ank1,Anxa6,Anxa7,Ar,Arhgap22,Arhgef7,Arntl,Asxl1,Atp2a2,Atp2b1,Atp2b2,Atp6v0a4,Atp6v1h,BC048403,Bach1,Bicdl1,Boc,Brms1,Brpf3,Btbd9,C9,Cacna1b,Cacna1d,Cacna1i,Cacna1s,Cacna2d3,Cacnb3,Camkmt,Car2,Cast,Ccdc57,Cckbr,Cd84,Cdca8,Cdkal1,Cebpb,Cenpo,Cers5,Cftr,Chek2,Chn1,Cldn10,Clvs1,Cnnm4,Cp,C…
Mouse Phenotype	MP:0001458	abnormal object recognition memory	20	2.21916e-39	2.09711e-35	1.04855e-36	2.43662	115.324	281	0.00998821	0.0243374	355	2.09796e-07	0.00198257	5.5847e-06	1.73253	31.7456	55	83	0.00719142	0.662651	unnamed,unnamed,unnamed,unnamed,unnamed,unnamed,unnamed,unnamed,unnamed,unnamed,unnamed,unnamed,unnamed,unnamed,unnamed,unnamed,unnamed,unnamed,unnamed,unnamed,unnamed,unnamed,unnamed,unnamed,unnamed,unnamed,unnamed,unnamed,unnamed,unnamed,unnamed,unnamed,unnamed,unnamed,unnamed,unnamed,unnamed,unnamed,unnamed,unnamed,unnamed,unnamed,unnamed,unnamed,unnamed,unnamed,unnamed,unnamed,unnamed,unnamed…	App,Arc,Arpc3,Baiap2,Brd7,Cacnb3,Camk2a,Camk2b,Crebbp,Ctnnb1,Dcdc2a,Dtnbp1,Egr1,Emx1,Fgf13,Foxo6,Gabbr1,Gal,Gnai1,Grin1,Grin2b,Itm2b,Jph3,Kcnh3,Kcnn2,Kl,Lmx1a,Lmx1b,Lzts1,Mapt,Ncor1,Npy2r,Pcdh9,Pde4b,Prnp,Psen1,Rbfox3,Rcan1,Rgs4,Shank3,Slc17a7,Slc18a1,Slc6a1,Slc6a3,Slc8a2,Snap25,Sorbs2,Sorl1,Srcin1,Srgap3,Syn2,Thra,Tnik,Wasf1,Ywhaz
Mouse Phenotype	MP:0001399	hyperactivity	21	6.9257e-39	6.54479e-35	3.11657e-36	1.48612	761.044	1131	0.0659141	0.097956	20	1.46678e-22	1.38611e-18	6.93055e-20	1.56764	184.354	289	482	0.0377877	0.599585	unnamed,unnamed,unnamed,unnamed,unnamed,unnamed,unnamed,unnamed,unnamed,unnamed,unnamed,unnamed,unnamed,unnamed,unnamed,unnamed,unnamed,unnamed,unnamed,unnamed,unnamed,unnamed,unnamed,unnamed,unnamed,unnamed,unnamed,unnamed,unnamed,unnamed,unnamed,unnamed,unnamed,unnamed,unnamed,unnamed,unnamed,unnamed,unnamed,unnamed,unnamed,unnamed,unnamed,unnamed,unnamed,unnamed,unnamed,unnamed,unnamed,unnamed…	Abcd2,Abcg1,Abr,Acot7,Adam11,Adcy3,Adcyap1,Adcyap1r1,Adgrb2,Adgrl3,Adipor2,Agt,Ankfn1,Anks1b,Ap2b1,Apaf1,App,Appl1,Arhgef11,Arpc3,Arrdc3,Arsa,Atf2,Atg7,Atmin,Atp1a3,Atrn,Atxn2,B3galt2,Basp1,Bcr,Bdnf,Bex6,Brinp1,Btbd9,Cacna1b,Cacna1g,Cacna2d2,Cacna2d3,Cacng2,Cadps2,Camk2a,Ccdc7a,Cckbr,Cdh23,Cdk4,Cdk5r1,Celf4,Cers1,Cers6,Chd7,Chn1,Chrm1,Chrm4,Chrnb2,Ciz1,Ckap5,Clcn3,Cnr1,Cntnap2,Cox4i1,Cpe,Cplx2,Cr…
Mouse Phenotype	MP:0012006	abnormal hippocampus physiology	22	9.97545e-38	9.4268e-34	4.28491e-35	10.4562	5.45131	57	0.000472139	0.00493678	4587	0.159583	1	0.328769	1.9609	1.52991	3	4	0.000392259	0.75	unnamed,unnamed,unnamed,unnamed,unnamed,unnamed,unnamed,unnamed,unnamed,unnamed,unnamed,unnamed,unnamed,unnamed,unnamed,unnamed,unnamed,unnamed,unnamed,unnamed,unnamed,unnamed,unnamed,unnamed,unnamed,unnamed,unnamed,unnamed,unnamed,unnamed,unnamed,unnamed,unnamed,unnamed,unnamed,unnamed,unnamed,unnamed,unnamed,unnamed,unnamed,unnamed,unnamed,unnamed,unnamed,unnamed,unnamed,unnamed,unnamed,unnamed…	Gabbr2,Rbfox3,Syn2
Mouse Phenotype	MP:0002067	abnormal sensory capabilities/reflexes/nociception	23	1.35191e-37	1.27755e-33	5.55458e-35	1.32642	1454.29	1929	0.125956	0.167071	7	1.19155e-30	1.12601e-26	1.60859e-27	1.46931	364.118	535	952	0.0699529	0.561975	unnamed,unnamed,unnamed,unnamed,unnamed,unnamed,unnamed,unnamed,unnamed,unnamed,unnamed,unnamed,unnamed,unnamed,unnamed,unnamed,unnamed,unnamed,unnamed,unnamed,unnamed,unnamed,unnamed,unnamed,unnamed,unnamed,unnamed,unnamed,unnamed,unnamed,unnamed,unnamed,unnamed,unnamed,unnamed,unnamed,unnamed,unnamed,unnamed,unnamed,unnamed,unnamed,unnamed,unnamed,unnamed,unnamed,unnamed,unnamed,unnamed,unnamed…	Abcc3,Abcc4,Abl2,Acsm4,Actg1,Adcy1,Adgrg1,Adipor2,Adora1,Adra1d,Adra2a,Adra2c,Aebp2,Afap1l2,Aff2,Agap1,Agrn,Ajap1,Ankrd1,Ankrd11,Anp32e,Ap2a2,Aplp2,App,Arhgap32,Arhgef4,Arntl,Atg7,Atn1,Atp1a3,Atp2a2,Atp2b2,Atp6v0a4,Atp8a2,Atxn1,Auts2,Avil,B3galt2,B4galnt1,B4galnt2,B9d1,Barhl1,Bdnf,Bend3,Bhlhe22,Bmp4,Brsk2,Bsn,Btbd9,Btg2,Cacna1a,Cacna1b,Cacna1d,Cacna1e,Cacna1i,Cacna1s,Cacna2d2,Cacna2d3,Cacnb4,Cacn…
Mouse Phenotype	MP:0000801	abnormal temporal lobe morphology	24	1.73143e-36	1.6362e-32	6.81749e-34	1.53329	607.845	932	0.0526455	0.0807206	21	1.51247e-22	1.42928e-18	6.80611e-20	1.65279	140.369	232	367	0.0303347	0.632153	unnamed,unnamed,unnamed,unnamed,unnamed,unnamed,unnamed,unnamed,unnamed,unnamed,unnamed,unnamed,unnamed,unnamed,unnamed,unnamed,unnamed,unnamed,unnamed,unnamed,unnamed,unnamed,unnamed,unnamed,unnamed,unnamed,unnamed,unnamed,unnamed,unnamed,unnamed,unnamed,unnamed,unnamed,unnamed,unnamed,unnamed,unnamed,unnamed,unnamed,unnamed,unnamed,unnamed,unnamed,unnamed,unnamed,unnamed,unnamed,unnamed,unnamed…	Abi2,Agt,Agtpbp1,Akt3,Ank3,Ap3m2,Apbb1,Apbb2,Apc2,Arhgap33,Arl6,Arpc3,Arsg,Atg7,Atp1a3,Atp2b2,Bad,Basp1,Bcan,Bcl2l11,Bdnf,Bid,Brinp1,Brsk2,Btg1,C1qa,Cacng2,Cacng8,Cadm1,Cadps,Cd81,Cdk5r1,Cdk5r2,Cdk5rap2,Cers6,Chd7,Chl1,Chn2,Chrm1,Cit,Ckap5,Ckb,Clcn3,Clstn3,Col4a1,Cox10,Cpeb3,Cplx2,Crmp1,Csf1,Ctnna2,Ctnnb1,Ctnnd1,Ctsb,Cxcr4,D430042O09Rik,Dab1,Dag1,Dbn1,Dclk1,Dclk2,Disc1,Dlg4,Dmrta2,Dpysl4,Drd1,Dyr…
Mouse Phenotype	MP:0000878	abnormal Purkinje cell number	25	2.94888e-36	2.78669e-32	1.11468e-33	2.33301	120.445	281	0.0104318	0.0243374	478	1.94297e-06	0.0183611	3.84123e-05	1.67847	30.9806	52	81	0.00679916	0.641975	unnamed,unnamed,unnamed,unnamed,unnamed,unnamed,unnamed,unnamed,unnamed,unnamed,unnamed,unnamed,unnamed,unnamed,unnamed,unnamed,unnamed,unnamed,unnamed,unnamed,unnamed,unnamed,unnamed,unnamed,unnamed,unnamed,unnamed,unnamed,unnamed,unnamed,unnamed,unnamed,unnamed,unnamed,unnamed,unnamed,unnamed,unnamed,unnamed,unnamed,unnamed,unnamed,unnamed,unnamed,unnamed,unnamed,unnamed,unnamed,unnamed,unnamed…	Agtpbp1,Ank3,Arsg,Atf2,Atg7,Atp2b2,Atxn1,B4galt2,Cacna1a,Cacna1g,Cacna2d2,Cadps2,Camk4,Cers1,Crybb2,Ebf2,En1,Erbb3,Fbxw7,Gabra1,Gba,Grid2,Herc1,Kcnj6,Kl,Ldb1,Ldlr,Lhx1,Lhx5,Lyst,Mycn,Naglu,Neurod1,Numb,Pdss2,Pi4k2a,Prnp,Psap,Pten,Pura,Rbfox2,Rora,Scn8a,Scyl1,Shh,Skor2,Stxbp1,Sumf1,Thrb,Trim2,Tsc1,Zfp423
Mouse Phenotype	MP:0000877	abnormal Purkinje cell morphology	26	8.21872e-36	7.76669e-32	2.98719e-33	1.77353	308.989	548	0.0267616	0.0474623	208	7.17576e-10	6.7811e-06	3.26014e-08	1.5131	89.882	136	235	0.0177824	0.578723	unnamed,unnamed,unnamed,unnamed,unnamed,unnamed,unnamed,unnamed,unnamed,unnamed,unnamed,unnamed,unnamed,unnamed,unnamed,unnamed,unnamed,unnamed,unnamed,unnamed,unnamed,unnamed,unnamed,unnamed,unnamed,unnamed,unnamed,unnamed,unnamed,unnamed,unnamed,unnamed,unnamed,unnamed,unnamed,unnamed,unnamed,unnamed,unnamed,unnamed,unnamed,unnamed,unnamed,unnamed,unnamed,unnamed,unnamed,unnamed,unnamed,unnamed…	Abcd2,Abl1,Abl2,Aff1,Aga,Agtpbp1,Ank1,Ank3,Apc2,App,Arsa,Arsg,Atf2,Atg7,Atp2b2,Atxn1,Atxn2,B4galnt1,B4galt2,Cacna1a,Cacna1g,Cacna2d2,Cadps2,Calb1,Camk4,Camta1,Ccnd1,Cdk5r1,Cend1,Cers1,Cnp,Cntn1,Cp,Crybb2,Ctnna2,Ctsb,Cxcr4,Dab1,Dab2ip,Dnajc3,Dnm1,Dpysl5,Ebf2,Eef1a2,En1,Erbb3,Fa2h,Fbxw7,Fgf8,Gabra1,Gas1,Gba,Gjc2,Gnb5,Gpr37l1,Grid2,Herc1,Hexb,Inpp4a,Itpr1,Kcnj6,Kif14,Kl,Ldb1,Ldlr,Lhx1,Lhx5,Lrp8,Lyst…
Mouse Phenotype	MP:0002912	abnormal excitatory postsynaptic potential	27	9.71012e-36	9.17606e-32	3.39854e-33	1.96497	208.655	410	0.0180716	0.0355101	110	1.97725e-13	1.8685e-09	1.69864e-11	1.90148	42.0724	80	110	0.0104603	0.727273	unnamed,unnamed,unnamed,unnamed,unnamed,unnamed,unnamed,unnamed,unnamed,unnamed,unnamed,unnamed,unnamed,unnamed,unnamed,unnamed,unnamed,unnamed,unnamed,unnamed,unnamed,unnamed,unnamed,unnamed,unnamed,unnamed,unnamed,unnamed,unnamed,unnamed,unnamed,unnamed,unnamed,unnamed,unnamed,unnamed,unnamed,unnamed,unnamed,unnamed,unnamed,unnamed,unnamed,unnamed,unnamed,unnamed,unnamed,unnamed,unnamed,unnamed…	Adcy1,Adk,Adora1,Aff2,Akap5,Arhgef9,Asic1,Atxn1,Bdnf,Cacna1a,Cacna1b,Camk2a,Cd47,Cdk5r1,Chrm1,Chst10,Ckap5,Clcn3,Clstn1,Clstn3,Cnr1,Dlg2,Dlgap3,Efna3,Egr3,Esr2,Fyn,Gad1,Galr1,Grasp,Gria1,Gria2,Gria3,Grin2b,Grm2,Grm5,Grn,Itpr1,Jph3,Kcnn2,Lrrtm4,Mapk9,Mapt,Mbnl2,Myf5,Neurod6,Nlgn3,Nrgn,Ntrk2,Olig2,Ophn1,Oprm1,Plppr4,Plxnd1,Prnp,Rap1a,Rap1b,Rarb,Rasgrf1,Rbfox1,Rbfox3,Rims1,Rock2,Runx3,Shank2,Shank3,…
Mouse Phenotype	MP:0002886	abnormal glutamate-mediated receptor currents	28	1.37057e-35	1.29519e-31	4.62568e-33	2.51656	94.5735	238	0.00819102	0.0206132	280	2.14904e-08	0.000203084	7.25301e-07	1.90903	24.096	46	63	0.00601464	0.730159	unnamed,unnamed,unnamed,unnamed,unnamed,unnamed,unnamed,unnamed,unnamed,unnamed,unnamed,unnamed,unnamed,unnamed,unnamed,unnamed,unnamed,unnamed,unnamed,unnamed,unnamed,unnamed,unnamed,unnamed,unnamed,unnamed,unnamed,unnamed,unnamed,unnamed,unnamed,unnamed,unnamed,unnamed,unnamed,unnamed,unnamed,unnamed,unnamed,unnamed,unnamed,unnamed,unnamed,unnamed,unnamed,unnamed,unnamed,unnamed,unnamed,unnamed…	Adarb1,Akap5,Arc,Cacnb3,Cacng2,Cacng8,Clstn1,Cnih2,Cnih3,Dapk1,Dlg4,Dlgap3,Efna3,Emx1,Eps8,Ext1,Fosb,Gja10,Gnaq,Gria1,Gria2,Grik1,Grik4,Grin1,Grin2a,Grin2b,Kalrn,Lgi1,Lzts1,Mapk8ip1,Mapk8ip2,Neurod6,Nlgn3,Nrxn2,Nrxn3,Pip5k1c,Ppp1r9b,Rgs9,Shank3,Slc17a6,Slc6a9,Stx1b,Syngap1,Tnfrsf1a,Tyr,Wasf1
Mouse Phenotype	MP:0002572	abnormal emotion/affect behavior	29	4.77666e-35	4.51394e-31	1.55653e-32	1.39402	990.661	1381	0.0858013	0.119609	30	4.36232e-21	4.12239e-17	1.37413e-18	1.47402	242.873	358	635	0.0468096	0.563779	unnamed,unnamed,unnamed,unnamed,unnamed,unnamed,unnamed,unnamed,unnamed,unnamed,unnamed,unnamed,unnamed,unnamed,unnamed,unnamed,unnamed,unnamed,unnamed,unnamed,unnamed,unnamed,unnamed,unnamed,unnamed,unnamed,unnamed,unnamed,unnamed,unnamed,unnamed,unnamed,unnamed,unnamed,unnamed,unnamed,unnamed,unnamed,unnamed,unnamed,unnamed,unnamed,unnamed,unnamed,unnamed,unnamed,unnamed,unnamed,unnamed,unnamed…	9930012K11Rik,Aaas,Abca13,Abl2,Adamts7,Adcy1,Adcyap1,Adcyap1r1,Adgrb2,Adgrl3,Adora1,Adra2c,Akap11,Akap5,Aldob,Alk,Apba2,App,Arc,Arhgap32,Arhgef6,Arhgef9,Arid3a,Arsg,Asxl1,Atg7,Atmin,Atp1a1,Atp1a3,Atxn1,Avpr1a,B3galt2,B4galt5,Bcl7a,Bdnf,Brinp1,Btbd16,Cacna1b,Cacna1e,Cacna2d3,Cacnb4,Cadps2,Camk2a,Camk2b,Camk4,Camkmt,Car7,Cckbr,Cd47,Cdh23,Cdk5r1,Cer1,Cers1,Cers6,Chd6,Chl1,Chrna4,Chrnb2,Chst1,Chst14,…
Mouse Phenotype	MP:0005076	abnormal cell differentiation	30	5.571e-35	5.2646e-31	1.75487e-32	1.36747	1114.47	1524	0.0965242	0.131994	5	5.38571e-32	5.08949e-28	1.0179e-28	1.5543	277.296	431	725	0.0563546	0.594483	unnamed,unnamed,unnamed,unnamed,unnamed,unnamed,unnamed,unnamed,unnamed,unnamed,unnamed,unnamed,unnamed,unnamed,unnamed,unnamed,unnamed,unnamed,unnamed,unnamed,unnamed,unnamed,unnamed,unnamed,unnamed,unnamed,unnamed,unnamed,unnamed,unnamed,unnamed,unnamed,unnamed,unnamed,unnamed,unnamed,unnamed,unnamed,unnamed,unnamed,unnamed,unnamed,unnamed,unnamed,unnamed,unnamed,unnamed,unnamed,unnamed,unnamed…	Abcg1,Abcg5,Abhd5,Abl1,Abl2,Abr,Acvr1,Acvr1b,Adam10,Adgrg1,Adgrg6,Adrb2,Aldh1b1,Ank,Ank2,Apaf1,Apbb1,Apbb2,Apc,App,Arhgap32,Arhgef11,Ascl1,Atf2,Atp2a2,Atp2b2,Atp6v1h,Basp1,Batf3,Bcl11a,Bclaf1,Bcr,Bdnf,Bhlhe22,Bmp4,Bmp8b,Brinp1,Brsk2,Bscl2,Bub1b,Cacna1d,Cacng2,Camk4,Casp8,Ccr2,Cd40lg,Cd44,Cd47,Cdh2,Cdk5r1,Cdk5r2,Cebpb,Cebpe,Celsr3,Chn1,Chn2,Chst14,Cldn18,Clec11a,Cnr1,Cntn1,Col1a1,Cpeb4,Creb3l1,Cre…
Mouse Phenotype	MP:0002447	abnormal erythrocyte morphology	31	4.64212e-34	4.3868e-30	1.4151e-31	1.42987	828.747	1185	0.0717779	0.102633	328	1.00727e-07	0.000951874	2.90205e-06	1.22944	314.778	387	823	0.0506015	0.470231	unnamed,unnamed,unnamed,unnamed,unnamed,unnamed,unnamed,unnamed,unnamed,unnamed,unnamed,unnamed,unnamed,unnamed,unnamed,unnamed,unnamed,unnamed,unnamed,unnamed,unnamed,unnamed,unnamed,unnamed,unnamed,unnamed,unnamed,unnamed,unnamed,unnamed,unnamed,unnamed,unnamed,unnamed,unnamed,unnamed,unnamed,unnamed,unnamed,unnamed,unnamed,unnamed,unnamed,unnamed,unnamed,unnamed,unnamed,unnamed,unnamed,unnamed…	1810011O10Rik,3110043O21Rik,Abca4,Abcb10,Abcg5,Actl6a,Acvrl1,Adam10,Adamts7,Add2,Add3,Adgrf5,Agap1,Ago2,Angel1,Ank1,Anxa7,Ap2a2,Apbb2,Apc,Appl1,Appl2,Ar,Arf2,Arhgap25,Arhgef4,Arid3a,Arpc1b,Arpc2,Arrb1,Asxl1,Atg16l1,Atl2,Atmin,Atp6v1c1,Atp8a1,Avpi1,B4galt1,Bap1,Bcl11a,Bcl2l11,Bcl6b,Bdkrb2,Bend3,Bhlhe40,Bmp4,Bmp7,Brd1,Btg2,Btrc,Bub1b,Camkmt,Cand2,Casp8,Cbfa2t3,Cby1,Ccbe1,Ccdc57,Ccna1,Ccnd1,Ccnd3,Cd…
Mouse Phenotype	MP:0001405	impaired coordination	32	1.4164e-33	1.33849e-29	4.1828e-31	1.45846	730.225	1065	0.0632448	0.0922397	37	5.76196e-20	5.44506e-16	1.47164e-17	1.53961	178.617	275	467	0.0359571	0.588865	unnamed,unnamed,unnamed,unnamed,unnamed,unnamed,unnamed,unnamed,unnamed,unnamed,unnamed,unnamed,unnamed,unnamed,unnamed,unnamed,unnamed,unnamed,unnamed,unnamed,unnamed,unnamed,unnamed,unnamed,unnamed,unnamed,unnamed,unnamed,unnamed,unnamed,unnamed,unnamed,unnamed,unnamed,unnamed,unnamed,unnamed,unnamed,unnamed,unnamed,unnamed,unnamed,unnamed,unnamed,unnamed,unnamed,unnamed,unnamed,unnamed,unnamed…	3110043O21Rik,Abcd2,Abl1,Abl2,Abr,Acot7,Adam11,Adamts7,Adarb1,Adcy5,Afg3l1,Aga,Akap5,Alpl,Anp32e,Apc2,App,Arhgap10,Arhgap32,Arsa,Astn1,Atp2b2,Atxn1,Atxn2,Avil,B3galt2,B4galnt1,B4galt2,Barhl2,Bcr,Bdnf,Bmp7,Brinp1,Cacna1a,Cacna1g,Cacna2d2,Cacnb4,Cacng2,Cadm4,Cadps2,Calb2,Camk2b,Camk4,Camkmt,Camta1,Cbln1,Cckbr,Ccnd1,Cdk5r1,Celsr3,Cend1,Cers6,Chd6,Ciz1,Clcn3,Cldn11,Cldn19,Clip2,Cmah,Cnp,Cnr1,Cntn6,Co…
Mouse Phenotype	MP:0000875	abnormal cerebellar Purkinje cell layer	33	1.69982e-33	1.60633e-29	4.86766e-31	1.68109	361.67	608	0.0313243	0.0526589	164	3.81359e-11	3.60385e-07	2.19747e-09	1.52264	99.8264	152	261	0.0198745	0.582376	unnamed,unnamed,unnamed,unnamed,unnamed,unnamed,unnamed,unnamed,unnamed,unnamed,unnamed,unnamed,unnamed,unnamed,unnamed,unnamed,unnamed,unnamed,unnamed,unnamed,unnamed,unnamed,unnamed,unnamed,unnamed,unnamed,unnamed,unnamed,unnamed,unnamed,unnamed,unnamed,unnamed,unnamed,unnamed,unnamed,unnamed,unnamed,unnamed,unnamed,unnamed,unnamed,unnamed,unnamed,unnamed,unnamed,unnamed,unnamed,unnamed,unnamed…	Abcd2,Abl1,Abl2,Aff1,Aga,Agtpbp1,Ank1,Ank3,Apc2,App,Arsa,Arsg,Ass1,Astn1,Atf2,Atg7,Atp2b2,Atxn1,Atxn2,B4galnt1,B4galt2,Cacna1a,Cacna1g,Cacna2d2,Cadps2,Calb1,Camk4,Camta1,Ccnd1,Cdk5r1,Cdk5r2,Cend1,Cers1,Cit,Cnp,Cntn1,Cp,Crybb2,Ctnna2,Ctsb,Cxcr4,Dab1,Dab2ip,Dnajc3,Dnm1,Dpysl5,Ebf2,Eef1a2,En1,Erbb3,Fa2h,Fbxw7,Fgf8,Gabra1,Gas1,Gba,Gja1,Gjc2,Gli2,Gli3,Gnb5,Gpr37l1,Grid2,Herc1,Hexb,Inpp4a,Itgb1,Itpr1,K…
Mouse Phenotype	MP:0013659	abnormal erythroid lineage cell morphology	34	2.26702e-33	2.14234e-29	6.30099e-31	1.40525	900.196	1265	0.0779661	0.109562	261	9.08696e-09	8.58718e-05	3.29011e-07	1.23924	338.109	419	884	0.0547856	0.473982	unnamed,unnamed,unnamed,unnamed,unnamed,unnamed,unnamed,unnamed,unnamed,unnamed,unnamed,unnamed,unnamed,unnamed,unnamed,unnamed,unnamed,unnamed,unnamed,unnamed,unnamed,unnamed,unnamed,unnamed,unnamed,unnamed,unnamed,unnamed,unnamed,unnamed,unnamed,unnamed,unnamed,unnamed,unnamed,unnamed,unnamed,unnamed,unnamed,unnamed,unnamed,unnamed,unnamed,unnamed,unnamed,unnamed,unnamed,unnamed,unnamed,unnamed…	1810011O10Rik,3110043O21Rik,Abca4,Abcb10,Abcg5,Actl6a,Acvrl1,Adam10,Adamts7,Adar,Add2,Add3,Adgrf5,Agap1,Ago2,Angel1,Ank1,Anxa7,Ap2a2,Apbb2,Apc,Appl1,Appl2,Ar,Arf2,Arhgap25,Arhgef11,Arhgef12,Arhgef4,Arid3a,Arpc1b,Arpc2,Arrb1,Asxl1,Atg16l1,Atl2,Atmin,Atp6v1c1,Atp8a1,Avpi1,B4galt1,Bap1,Bcl11a,Bcl2l11,Bcl6b,Bdkrb2,Bend3,Bhlhe40,Bmp4,Bmp7,Brd1,Btg2,Btrc,Bub1b,Camkmt,Cand2,Casp8,Cbfa2t3,Cby1,Ccbe1,Ccdc…
Mouse Phenotype	MP:0001402	hypoactivity	35	3.3478e-33	3.16367e-29	9.03905e-31	1.48551	652.976	970	0.0565543	0.0840118	171	5.60864e-11	5.30016e-07	3.09951e-09	1.37002	191.238	262	500	0.0342573	0.524	unnamed,unnamed,unnamed,unnamed,unnamed,unnamed,unnamed,unnamed,unnamed,unnamed,unnamed,unnamed,unnamed,unnamed,unnamed,unnamed,unnamed,unnamed,unnamed,unnamed,unnamed,unnamed,unnamed,unnamed,unnamed,unnamed,unnamed,unnamed,unnamed,unnamed,unnamed,unnamed,unnamed,unnamed,unnamed,unnamed,unnamed,unnamed,unnamed,unnamed,unnamed,unnamed,unnamed,unnamed,unnamed,unnamed,unnamed,unnamed,unnamed,unnamed…	2700060E02Rik,3110079O15Rik,Aaas,Acot13,Acot7,Acta1,Actg1,Adarb1,Adcy5,Adgrl2,Afap1l2,Akap11,Alk,Ank3,Apba2,App,Arntl,Atp6v1c1,Atxn1,Bahcc1,Baz1a,Bdnf,Brsk2,Bsx,Cacna1a,Cacna1g,Cacnb4,Camk4,Cavin1,Cd28,Cd81,Cdc42,Cdc73,Cdo1,Cep19,Cer1,Cers1,Chd4,Chn1,Chst3,Chst8,Ciz1,Cmpk2,Cnp,Cnr1,Col1a1,Cops4,Cox10,Cpe,Cpeb3,Cplx2,Crebbp,Crhr1,Cry2,Cyb561,Cyp11a1,D630045J12Rik,Ddc,Dicer1,Dixdc1,Dlg4,Dll1,Dmd,Dn…
Mouse Phenotype	MP:0003506	acromegaly	36	6.74977e-33	6.37853e-29	1.77181e-30	13.8055	3.04227	42	0.000263491	0.00363762	6042	0.382476	1	0.598213	2.61454	0.382476	1	1	0.000130753	1	unnamed,unnamed,unnamed,unnamed,unnamed,unnamed,unnamed,unnamed,unnamed,unnamed,unnamed,unnamed,unnamed,unnamed,unnamed,unnamed,unnamed,unnamed,unnamed,unnamed,unnamed,unnamed,unnamed,unnamed,unnamed,unnamed,unnamed,unnamed,unnamed,unnamed,unnamed,unnamed,unnamed,unnamed,unnamed,unnamed,unnamed,unnamed,unnamed,unnamed,unnamed,unnamed	Kalrn
Mouse Phenotype	MP:0002123	abnormal definitive hematopoiesis	37	1.11914e-32	1.05758e-28	2.85833e-30	1.37595	1004.4	1382	0.0869909	0.119695	194	2.94447e-10	2.78253e-06	1.43429e-08	1.25161	368.325	461	963	0.0602772	0.478712	unnamed,unnamed,unnamed,unnamed,unnamed,unnamed,unnamed,unnamed,unnamed,unnamed,unnamed,unnamed,unnamed,unnamed,unnamed,unnamed,unnamed,unnamed,unnamed,unnamed,unnamed,unnamed,unnamed,unnamed,unnamed,unnamed,unnamed,unnamed,unnamed,unnamed,unnamed,unnamed,unnamed,unnamed,unnamed,unnamed,unnamed,unnamed,unnamed,unnamed,unnamed,unnamed,unnamed,unnamed,unnamed,unnamed,unnamed,unnamed,unnamed,unnamed…	1810011O10Rik,Abca1,Abcb10,Abcg1,Abl1,Actl6a,Acvrl1,Ada,Adam10,Adar,Adgrg3,Aff1,Ago2,Akap13,Akt3,Ank1,Apc,Ar,Arhgap17,Arhgef1,Arid3a,Arid3b,Arid5b,Arntl,Asxl1,Atf2,Atg7,Atmin,Avpr1a,B4galt1,B9d2,Bach2,Bad,Bap1,Batf,Bcl11a,Bcl11b,Bcl2,Bcl2l1,Bcl2l11,Bcr,Bhlhe40,Bin3,Birc3,Birc6,Blk,Brd1,Bub1b,C3ar1,Cacnb4,Cadm1,Casp8,Cbfa2t3,Cblb,Cbx4,Ccbe1,Ccna1,Ccnd1,Ccnd3,Ccr2,Cd180,Cd22,Cd24a,Cd28,Cd34,Cd37,Cd…
Mouse Phenotype	MP:0010745	abnormal pre-Botzinger complex morphology	38	1.34645e-32	1.27239e-28	3.3484e-30	12.9982	3.30815	43	0.000286519	0.00372423	3112	0.0559383	1	0.169864	2.61454	1.14743	3	3	0.000392259	1	unnamed,unnamed,unnamed,unnamed,unnamed,unnamed,unnamed,unnamed,unnamed,unnamed,unnamed,unnamed,unnamed,unnamed,unnamed,unnamed,unnamed,unnamed,unnamed,unnamed,unnamed,unnamed,unnamed,unnamed,unnamed,unnamed,unnamed,unnamed,unnamed,unnamed,unnamed,unnamed,unnamed,unnamed,unnamed,unnamed,unnamed,unnamed,unnamed,unnamed,unnamed,unnamed,unnamed	Dbx1,Kdm6b,Robo3
Mouse Phenotype	MP:0000813	abnormal hippocampus layer morphology	39	1.81331e-32	1.71358e-28	4.39379e-30	2.07276	156.796	325	0.0135801	0.0281483	236	3.88458e-09	3.67093e-05	1.55548e-07	1.71218	43.2198	74	113	0.00967573	0.654867	unnamed,unnamed,unnamed,unnamed,unnamed,unnamed,unnamed,unnamed,unnamed,unnamed,unnamed,unnamed,unnamed,unnamed,unnamed,unnamed,unnamed,unnamed,unnamed,unnamed,unnamed,unnamed,unnamed,unnamed,unnamed,unnamed,unnamed,unnamed,unnamed,unnamed,unnamed,unnamed,unnamed,unnamed,unnamed,unnamed,unnamed,unnamed,unnamed,unnamed,unnamed,unnamed,unnamed,unnamed,unnamed,unnamed,unnamed,unnamed,unnamed,unnamed…	Abi2,Agt,Apc2,Arpc3,Atg7,Atp1a3,C1qa,Cacng8,Cadps,Cd81,Cdk5r1,Cdk5r2,Ckap5,Clcn3,Clstn3,Cpeb3,Crmp1,Csf1,Ctnna2,Ctnnd1,Ctsb,Dab1,Dag1,Dclk1,Dclk2,Dlg4,Dpysl4,Efna3,Emx1,Epg5,Foxg1,Fyn,Islr2,Kalrn,Kcnj6,Kif2a,Klf7,Lmx1a,Lrp8,Lyst,Macf1,Map1b,Map2,Mapt,Mkl1,Mkl2,Ncam1,Ndel1,Neurod1,Neurod6,Nr4a3,Ppp1r9b,Prnp,Prox1,Psap,Psen1,Pten,Pura,Rac1,Rbfox3,Scn1a,Shank1,Slc1a2,Syn1,Syngap1,Tmem108,Tnr,Trib2,T…
Mouse Phenotype	MP:0003949	abnormal circulating lipid level	40	1.86425e-32	1.76171e-28	4.40428e-30	1.38669	950.464	1318	0.0823198	0.114152	82	4.62694e-15	4.37246e-11	5.33227e-13	1.32609	345.376	458	903	0.0598849	0.507198	unnamed,unnamed,unnamed,unnamed,unnamed,unnamed,unnamed,unnamed,unnamed,unnamed,unnamed,unnamed,unnamed,unnamed,unnamed,unnamed,unnamed,unnamed,unnamed,unnamed,unnamed,unnamed,unnamed,unnamed,unnamed,unnamed,unnamed,unnamed,unnamed,unnamed,unnamed,unnamed,unnamed,unnamed,unnamed,unnamed,unnamed,unnamed,unnamed,unnamed,unnamed,unnamed,unnamed,unnamed,unnamed,unnamed,unnamed,unnamed,unnamed,unnamed…	3110079O15Rik,4930402H24Rik,Abca1,Abcg5,Abcg8,Abhd5,Acaca,Acads,Acot13,Acot7,Acox1,Adar,Adcyap1,Adgrf5,Adipor2,Adora2b,Agap2,Agt,Ahcyl1,Alb,Angptl3,Ank2,Ankrd11,Ankrd26,Ap1m2,Ap2a2,Apc,Apoa1,Apoa2,Apob,Apobec1,App,Aqp11,Aqp9,Ar,Arhgef4,Arntl,Arrdc3,Asxl1,Atad2b,Atp1a1,Atp6ap2,Atxn2,Avpr1a,BC048403,Bag3,Brd7,Bscl2,Btbd9,Cacna1b,Cacna2d3,Cacng3,Cap2,Car7,Cavin1,Ccdc120,Ccdc80,Ccdc92,Ccl2,Ccr2,Cd84,…
Mouse Phenotype	MP:0002063	abnormal learning/memory/conditioning	41	2.18583e-32	2.06561e-28	5.03807e-30	1.35867	1079.73	1467	0.0935157	0.127057	13	1.0465e-25	9.88945e-22	7.60727e-23	1.50765	261.996	395	685	0.0516475	0.576642	unnamed,unnamed,unnamed,unnamed,unnamed,unnamed,unnamed,unnamed,unnamed,unnamed,unnamed,unnamed,unnamed,unnamed,unnamed,unnamed,unnamed,unnamed,unnamed,unnamed,unnamed,unnamed,unnamed,unnamed,unnamed,unnamed,unnamed,unnamed,unnamed,unnamed,unnamed,unnamed,unnamed,unnamed,unnamed,unnamed,unnamed,unnamed,unnamed,unnamed,unnamed,unnamed,unnamed,unnamed,unnamed,unnamed,unnamed,unnamed,unnamed,unnamed…	9930012K11Rik,Aaas,Abca13,Abi2,Abl2,Acsm4,Adam11,Adcy1,Adcyap1,Adcyap1r1,Add2,Adgrb3,Adk,Adra1d,Adra2c,Aff2,Aga,Akap5,Aldob,Amph,Ankfn1,Apba2,Apbb1,App,Arc,Arhgap32,Arhgef6,Arhgef9,Arpc3,Arsa,Arsg,Asic1,Atp1a1,Atp1a3,Atxn1,Avpr1a,B3gat1,B4galt2,Baiap2,Bcl7a,Bdnf,Brd7,Brinp1,Btbd16,Btbd9,Btg1,C1ql1,Cacna1b,Cacna1g,Cacnb3,Cadps2,Camk2a,Camk2b,Camk4,Camkk1,Camkk2,Camkmt,Car7,Cast,Ccl2,Ccl3,Ccr2,Cd47…
Mouse Phenotype	MP:0014114	abnormal cognition	42	2.58068e-32	2.43874e-28	5.80653e-30	1.35814	1080.15	1467	0.0935519	0.127057	15	1.54466e-25	1.45971e-21	9.73138e-23	1.50546	262.379	395	686	0.0516475	0.575802	unnamed,unnamed,unnamed,unnamed,unnamed,unnamed,unnamed,unnamed,unnamed,unnamed,unnamed,unnamed,unnamed,unnamed,unnamed,unnamed,unnamed,unnamed,unnamed,unnamed,unnamed,unnamed,unnamed,unnamed,unnamed,unnamed,unnamed,unnamed,unnamed,unnamed,unnamed,unnamed,unnamed,unnamed,unnamed,unnamed,unnamed,unnamed,unnamed,unnamed,unnamed,unnamed,unnamed,unnamed,unnamed,unnamed,unnamed,unnamed,unnamed,unnamed…	9930012K11Rik,Aaas,Abca13,Abi2,Abl2,Acsm4,Adam11,Adcy1,Adcyap1,Adcyap1r1,Add2,Adgrb3,Adk,Adra1d,Adra2c,Aff2,Aga,Akap5,Aldob,Amph,Ankfn1,Apba2,Apbb1,App,Arc,Arhgap32,Arhgef6,Arhgef9,Arpc3,Arsa,Arsg,Asic1,Atp1a1,Atp1a3,Atxn1,Avpr1a,B3gat1,B4galt2,Baiap2,Bcl7a,Bdnf,Brd7,Brinp1,Btbd16,Btbd9,Btg1,C1ql1,Cacna1b,Cacna1g,Cacnb3,Cadps2,Camk2a,Camk2b,Camk4,Camkk1,Camkk2,Camkmt,Car7,Cast,Ccl2,Ccl3,Ccr2,Cd47…
Mouse Phenotype	MP:0001362	abnormal anxiety-related response	43	2.58922e-32	2.44681e-28	5.69026e-30	1.52814	547.726	837	0.0474386	0.0724926	66	3.91858e-16	3.70306e-12	5.6107e-14	1.56872	128.13	201	335	0.0262814	0.6	unnamed,unnamed,unnamed,unnamed,unnamed,unnamed,unnamed,unnamed,unnamed,unnamed,unnamed,unnamed,unnamed,unnamed,unnamed,unnamed,unnamed,unnamed,unnamed,unnamed,unnamed,unnamed,unnamed,unnamed,unnamed,unnamed,unnamed,unnamed,unnamed,unnamed,unnamed,unnamed,unnamed,unnamed,unnamed,unnamed,unnamed,unnamed,unnamed,unnamed,unnamed,unnamed,unnamed,unnamed,unnamed,unnamed,unnamed,unnamed,unnamed,unnamed…	Adamts7,Adcyap1,Adcyap1r1,Adgrl3,Adora1,Akap11,Akap5,Alk,Apba2,App,Arhgef9,Arid3a,Atmin,Atp1a1,Atp1a3,Avpr1a,B3galt2,B4galt5,Bdnf,Brinp1,Cacna1b,Cacna1e,Cadps2,Camk2a,Camk2b,Camk4,Cckbr,Cer1,Cers1,Chd6,Chl1,Chrna4,Chrnb2,Chst14,Ckap5,Clcn6,Cnr1,Cpeb3,Cplx2,Crebbp,Crebrf,Crhr1,Crhr2,Csf1r,Csgalnact1,Csmd1,Ctnnb1,Cyfip2,Dao,Dcdc2a,Ddc,Ddr1,Disc1,Dixdc1,Dlg4,Dlgap3,Drd1,Dtnbp1,Dusp1,Dync1li1,Efna3,E…
Mouse Phenotype	MP:0009745	abnormal behavioral response to xenobiotic	44	5.37848e-32	5.08266e-28	1.15515e-29	1.55975	489.182	763	0.0423681	0.0660835	43	3.65012e-18	3.44936e-14	8.02178e-16	1.64619	113.596	187	297	0.0244508	0.62963	unnamed,unnamed,unnamed,unnamed,unnamed,unnamed,unnamed,unnamed,unnamed,unnamed,unnamed,unnamed,unnamed,unnamed,unnamed,unnamed,unnamed,unnamed,unnamed,unnamed,unnamed,unnamed,unnamed,unnamed,unnamed,unnamed,unnamed,unnamed,unnamed,unnamed,unnamed,unnamed,unnamed,unnamed,unnamed,unnamed,unnamed,unnamed,unnamed,unnamed,unnamed,unnamed,unnamed,unnamed,unnamed,unnamed,unnamed,unnamed,unnamed,unnamed…	Adcy5,Adgrl3,Adk,Adra1d,Akap5,Akt3,Alk,Amph,Anks1b,Ap3m2,Apba1,Aqp4,Arhgap32,Atp1a1,Atp1a3,Bdnf,Bhlhe40,Bsn,Cacna1a,Cacna1b,Cacna1g,Cacna2d1,Cacna2d2,Cacnb4,Camk4,Cckbr,Ccl2,Ccl3,Ccr2,Cd81,Cdk5r1,Chrm2,Chrm4,Chrna4,Chrnb2,Cit,Ckb,Clcn3,Cnr1,Cntn2,Crhr1,Ctnnb1,Cyfip2,Dao,Disc1,Dlg4,Dlgap3,Drd1,Drd4,Dtnbp1,Elfn1,Eml1,Emx1,En1,Eno2,Eps8,Faah,Faim2,Fyn,Fzd9,Gabbr1,Gabbr2,Gabra1,Gabra4,Gabrb1,Gabrd,Ga…
Mouse Phenotype	MP:0013693	abnormal hemopoiesis	45	1.4109e-31	1.3333e-27	2.9629e-29	1.36214	1036.6	1412	0.08978	0.122293	179	1.03757e-10	9.80504e-07	5.47767e-09	1.25445	378.652	475	990	0.0621077	0.479798	unnamed,unnamed,unnamed,unnamed,unnamed,unnamed,unnamed,unnamed,unnamed,unnamed,unnamed,unnamed,unnamed,unnamed,unnamed,unnamed,unnamed,unnamed,unnamed,unnamed,unnamed,unnamed,unnamed,unnamed,unnamed,unnamed,unnamed,unnamed,unnamed,unnamed,unnamed,unnamed,unnamed,unnamed,unnamed,unnamed,unnamed,unnamed,unnamed,unnamed,unnamed,unnamed,unnamed,unnamed,unnamed,unnamed,unnamed,unnamed,unnamed,unnamed…	1810011O10Rik,Abca1,Abcb10,Abcg1,Abl1,Actl6a,Acvrl1,Ada,Adam10,Adar,Adgrg3,Aff1,Ago2,Akap13,Akt3,Ank1,Apc,Ar,Arhgap17,Arhgef1,Arid3a,Arid3b,Arid5b,Arntl,Asxl1,Atf2,Atg7,Atmin,Avpr1a,B4galt1,B9d2,Bach2,Bad,Bap1,Batf,Bcl11a,Bcl11b,Bcl2,Bcl2l1,Bcl2l11,Bcr,Bhlhe40,Bin3,Birc3,Birc6,Blk,Brd1,Bub1b,C3ar1,Cacnb4,Cadm1,Casp8,Cbfa2t3,Cblb,Cbx4,Ccbe1,Ccna1,Ccnd1,Ccnd3,Ccr2,Cd180,Cd22,Cd24a,Cd28,Cd34,Cd37,Cd…
Mouse Phenotype	MP:0003996	clonic seizures	46	2.15792e-31	2.03923e-27	4.43311e-29	4.40553	21.5638	95	0.00186764	0.00822796	998	0.000360387	1	0.00341249	2.06411	7.26705	15	19	0.0019613	0.789474	unnamed,unnamed,unnamed,unnamed,unnamed,unnamed,unnamed,unnamed,unnamed,unnamed,unnamed,unnamed,unnamed,unnamed,unnamed,unnamed,unnamed,unnamed,unnamed,unnamed,unnamed,unnamed,unnamed,unnamed,unnamed,unnamed,unnamed,unnamed,unnamed,unnamed,unnamed,unnamed,unnamed,unnamed,unnamed,unnamed,unnamed,unnamed,unnamed,unnamed,unnamed,unnamed,unnamed,unnamed,unnamed,unnamed,unnamed,unnamed,unnamed,unnamed…	Bsn,Cacna1a,Cacnb4,Chrna4,Gabbr1,Gabbr2,Gnaq,Kcnq2,Lgi1,Mt1,Myo5a,Pcmt1,Scn1a,Sptbn2,Tyr
Mouse Phenotype	MP:0008251	abnormal phagocyte morphology	47	2.41278e-31	2.28008e-27	4.85123e-29	1.40136	861.305	1207	0.0745977	0.104538	80	3.67048e-15	3.4686e-11	4.33575e-13	1.33991	321.663	431	841	0.0563546	0.512485	unnamed,unnamed,unnamed,unnamed,unnamed,unnamed,unnamed,unnamed,unnamed,unnamed,unnamed,unnamed,unnamed,unnamed,unnamed,unnamed,unnamed,unnamed,unnamed,unnamed,unnamed,unnamed,unnamed,unnamed,unnamed,unnamed,unnamed,unnamed,unnamed,unnamed,unnamed,unnamed,unnamed,unnamed,unnamed,unnamed,unnamed,unnamed,unnamed,unnamed,unnamed,unnamed,unnamed,unnamed,unnamed,unnamed,unnamed,unnamed,unnamed,unnamed…	1700024P04Rik,1810011O10Rik,3110043O21Rik,4930404H24Rik,Abca1,Abcd2,Abcg1,Abcg5,Actl6a,Ada,Adam10,Adgrb1,Adgrf5,Adrb2,Afg3l1,Agap1,Akna,Ank,Ank1,Ankrd11,Ankrd27,Ap3b1,Apc,App,Ar,Arg1,Arhgap15,Arhgap22,Arhgap25,Arhgef1,Armc7,Arntl,Arsa,Arsg,Asxl1,Atg16l1,Atp1a3,Atp2a2,Atp6v1h,B4galnt1,B4galnt2,B4galt1,B9d2,Bach2,Bag3,Bap1,Batf3,Bcl2l11,Bcl6b,Bcr,Birc3,Bmp1,Bmp7,C3ar1,C4b,Camk4,Capn11,Cartpt,Casp8,…
Mouse Phenotype	MP:0000822	abnormal brain ventricle morphology	48	4.70951e-31	4.45049e-27	9.27185e-29	1.56803	462.365	725	0.0400454	0.0627923	78	2.71998e-15	2.57038e-11	3.29536e-13	1.56225	123.54	193	323	0.0252354	0.597523	unnamed,unnamed,unnamed,unnamed,unnamed,unnamed,unnamed,unnamed,unnamed,unnamed,unnamed,unnamed,unnamed,unnamed,unnamed,unnamed,unnamed,unnamed,unnamed,unnamed,unnamed,unnamed,unnamed,unnamed,unnamed,unnamed,unnamed,unnamed,unnamed,unnamed,unnamed,unnamed,unnamed,unnamed,unnamed,unnamed,unnamed,unnamed,unnamed,unnamed,unnamed,unnamed,unnamed,unnamed,unnamed,unnamed,unnamed,unnamed,unnamed,unnamed…	Acvrl1,Adamts3,Aga,Akt3,Ank2,Apaf1,Arhgap5,Arl6,Arnt2,Atf2,Atxn1,B4galt2,Basp1,Brsk2,Cables1,Ccm2,Cdc42,Cdk5r1,Cdk5rap2,Cdon,Celsr2,Cep120,Cfap54,Chd7,Chl1,Chn1,Clcn3,Clip2,Cntn2,Col18a1,Col4a1,Coro1c,Cp,Crb2,Csf1r,Ctnna1,Ctnnb1,D430042O09Rik,Dclk1,Dlg5,Dmrta2,Dnah5,Dnaic1,Drd1,Eml1,Emx1,Emx2,En1,Enah,Erbb3,Evl,Fgfr2,Fig4,Fkrp,Foxc1,Foxg1,Foxq1,Fuz,Fzd3,Gbx2,Gdf7,Gja1,Gldc,Gli3,Gpm6b,Gsx2,Hes1,He…
Mouse Phenotype	MP:0002229	neurodegeneration	49	6.0753e-31	5.74116e-27	1.17166e-28	1.46115	666.596	974	0.0577339	0.0843582	157	2.61933e-11	2.47526e-07	1.5766e-09	1.37858	189.326	261	495	0.0341266	0.527273	unnamed,unnamed,unnamed,unnamed,unnamed,unnamed,unnamed,unnamed,unnamed,unnamed,unnamed,unnamed,unnamed,unnamed,unnamed,unnamed,unnamed,unnamed,unnamed,unnamed,unnamed,unnamed,unnamed,unnamed,unnamed,unnamed,unnamed,unnamed,unnamed,unnamed,unnamed,unnamed,unnamed,unnamed,unnamed,unnamed,unnamed,unnamed,unnamed,unnamed,unnamed,unnamed,unnamed,unnamed,unnamed,unnamed,unnamed,unnamed,unnamed,unnamed…	Abca4,Abcd2,Acot7,Adarb1,Aff1,Afg3l1,Aga,Agtpbp1,Aipl1,Ank1,Ank3,Apaf1,App,Ar,Arsa,Arsb,Atg7,Atmin,Atn1,Atp2b2,Atp8a2,Atp8b1,Atrn,Atxn1,Avil,B4galnt1,Barhl1,Bbs10,Bcl2,Cacna1a,Cacna1d,Cacna2d2,Cacnb2,Camta1,Ccl2,Ccr2,Cd40lg,Cd46,Cdh23,Cers1,Chl1,Clcn2,Clcn3,Cldn11,Cldn14,Clic5,Cln8,Cmah,Cnga3,Cnp,Col1a1,Col25a1,Cox10,Cp,Crocc,Csf1r,Ctnna1,Ctsb,Cx3cr1,Dctn1,Dnajc3,Dock2,Dock3,Dst,Dync1h1,Ednrb,Eef…
Mouse Phenotype	MP:0001489	decreased startle reflex	50	7.70057e-31	7.27704e-27	1.45541e-28	1.94368	186.245	362	0.0161307	0.0313529	462	1.53899e-06	0.0145434	3.14792e-05	1.54402	48.5745	75	127	0.00980649	0.590551	unnamed,unnamed,unnamed,unnamed,unnamed,unnamed,unnamed,unnamed,unnamed,unnamed,unnamed,unnamed,unnamed,unnamed,unnamed,unnamed,unnamed,unnamed,unnamed,unnamed,unnamed,unnamed,unnamed,unnamed,unnamed,unnamed,unnamed,unnamed,unnamed,unnamed,unnamed,unnamed,unnamed,unnamed,unnamed,unnamed,unnamed,unnamed,unnamed,unnamed,unnamed,unnamed,unnamed,unnamed,unnamed,unnamed,unnamed,unnamed,unnamed,unnamed…	Abl2,Adra1d,Adra2a,Aebp2,Ankrd1,Ankrd11,Atp2b2,Atp8a2,Barhl1,Btg2,Cacna1b,Cacna2d3,Cacng2,Cast,Cdh23,Ckb,Colca2,Cox4i1,Cpt1c,Csmd1,Cyfip2,D1Ertd622e,Disc1,Dixdc1,Dlg4,Dst,Ednra,Efna3,Elmod1,Evl,Fbxo11,Fbxo2,Foxo3,Fzd3,Gas6,Gatm,Gipc3,Gnao1,Gria3,Htr1b,Kalrn,Kcne1,Kif3c,Loxhd1,Mag,Marveld2,Mbp,Myo6,Nav2,Ndufs4,Nedd4l,Nin,Nlgn3,Nptn,Park2,Peli1,Pex5l,Pip5k1c,Plcb1,Pou4f3,Pparg,Prune1,Ptprg,Scn8a,Sh…
Mouse Phenotype	MP:0006357	abnormal circulating mineral level	51	7.74621e-31	7.32017e-27	1.43533e-28	1.55031	485.709	753	0.0420673	0.0652174	322	9.30353e-08	0.000879183	2.73038e-06	1.32577	162.17	215	424	0.0281119	0.507076	unnamed,unnamed,unnamed,unnamed,unnamed,unnamed,unnamed,unnamed,unnamed,unnamed,unnamed,unnamed,unnamed,unnamed,unnamed,unnamed,unnamed,unnamed,unnamed,unnamed,unnamed,unnamed,unnamed,unnamed,unnamed,unnamed,unnamed,unnamed,unnamed,unnamed,unnamed,unnamed,unnamed,unnamed,unnamed,unnamed,unnamed,unnamed,unnamed,unnamed,unnamed,unnamed,unnamed,unnamed,unnamed,unnamed,unnamed,unnamed,unnamed,unnamed…	2010300C02Rik,Abcb11,Acvr1b,Adgrf5,Ajap1,Alb,Anxa6,Ar,Arhgap22,Arhgef7,Asxl1,Atp2b1,Atp6v0a4,Atp6v1h,BC048403,Bach1,Boc,Brms1,Brpf3,Btbd9,C9,Cacna1b,Cacna2d3,Camkmt,Car2,Cast,Ccdc57,Cckbr,Cd84,Cdkal1,Cenpo,Cers5,Chek2,Chn1,Cldn10,Cnnm4,Cp,Cpa2,Csf1,Cul3,Cyb561,Cyb5d1,Cyfip2,Cyp11a1,Cyp17a1,Cyp24a1,Cyp2c44,D1Ertd622e,Daam1,Dapk2,Dbn1,Ddhd1,Dnal4,Dpp9,Dusp4,Dync1i2,Dynlrb2,Edn1,Eef1akmt1,Eif4e3,Elk…
Mouse Phenotype	MP:0000807	abnormal hippocampus morphology	52	8.43812e-31	7.97402e-27	1.53346e-28	1.48701	602.549	896	0.0521869	0.0776026	27	1.1781e-21	1.11331e-17	4.12337e-19	1.64405	138.074	227	361	0.029681	0.628809	unnamed,unnamed,unnamed,unnamed,unnamed,unnamed,unnamed,unnamed,unnamed,unnamed,unnamed,unnamed,unnamed,unnamed,unnamed,unnamed,unnamed,unnamed,unnamed,unnamed,unnamed,unnamed,unnamed,unnamed,unnamed,unnamed,unnamed,unnamed,unnamed,unnamed,unnamed,unnamed,unnamed,unnamed,unnamed,unnamed,unnamed,unnamed,unnamed,unnamed,unnamed,unnamed,unnamed,unnamed,unnamed,unnamed,unnamed,unnamed,unnamed,unnamed…	Abi2,Agt,Agtpbp1,Akt3,Ank3,Ap3m2,Apbb1,Apbb2,Apc2,Arl6,Arpc3,Arsg,Atg7,Atp1a3,Bad,Basp1,Bcan,Bcl2l11,Bdnf,Bid,Brinp1,Brsk2,Btg1,C1qa,Cacng2,Cacng8,Cadm1,Cadps,Cd81,Cdk5r1,Cdk5r2,Cdk5rap2,Cers6,Chd7,Chl1,Chn2,Cit,Ckap5,Ckb,Clcn3,Clstn3,Col4a1,Cox10,Cpeb3,Cplx2,Crmp1,Csf1,Ctnna2,Ctnnb1,Ctnnd1,Ctsb,Cxcr4,D430042O09Rik,Dab1,Dag1,Dbn1,Dclk1,Dclk2,Dlg4,Dmrta2,Dpysl4,Drd1,Dyrk1a,Efna3,Emx1,Emx2,Eno2,Eom…
Mouse Phenotype	MP:0001468	abnormal temporal memory	53	1.44484e-30	1.36538e-26	2.57619e-28	1.67715	332.708	558	0.0288159	0.0483284	86	5.28451e-15	4.99386e-11	5.80681e-13	1.74303	69.9932	122	183	0.0159519	0.666667	unnamed,unnamed,unnamed,unnamed,unnamed,unnamed,unnamed,unnamed,unnamed,unnamed,unnamed,unnamed,unnamed,unnamed,unnamed,unnamed,unnamed,unnamed,unnamed,unnamed,unnamed,unnamed,unnamed,unnamed,unnamed,unnamed,unnamed,unnamed,unnamed,unnamed,unnamed,unnamed,unnamed,unnamed,unnamed,unnamed,unnamed,unnamed,unnamed,unnamed,unnamed,unnamed,unnamed,unnamed,unnamed,unnamed,unnamed,unnamed,unnamed,unnamed…	Abi2,Adcy1,Adcyap1r1,Add2,Adk,Amph,App,Arc,Arpc3,Bdnf,Brd7,Btbd9,Btg1,Cacnb3,Camk2a,Camk2b,Camk4,Camkk1,Chrm3,Clip2,Cpeb3,Crebbp,Ctnnb1,Ctnnd2,Dcdc2a,Disc1,Dlg4,Drd1,Dtnbp1,Dyrk1a,Efna3,Egr1,Emx1,Eno2,Epha6,Erbb4,Esr2,Fez1,Fos,Foxo6,Gabbr2,Gabrd,Gad2,Gnai1,Gpr85,Gria2,Grin1,Grin2a,Grin2b,Grm1,Grm5,Grm7,Gsk3a,Gsk3b,Homer1,Hspa4,Itm2b,Itsn1,Jph3,Kalrn,Kcnab2,Kcnh3,Kcnn2,Kl,Klf9,Ksr1,Lmx1a,Lmx1b,Lrf…
Mouse Phenotype	MP:0004166	abnormal limbic system morphology	54	1.61719e-30	1.52825e-26	2.83009e-28	1.45744	666.924	972	0.0577623	0.084185	24	6.85215e-22	6.47528e-18	2.69803e-19	1.60845	156.05	251	408	0.032819	0.615196	unnamed,unnamed,unnamed,unnamed,unnamed,unnamed,unnamed,unnamed,unnamed,unnamed,unnamed,unnamed,unnamed,unnamed,unnamed,unnamed,unnamed,unnamed,unnamed,unnamed,unnamed,unnamed,unnamed,unnamed,unnamed,unnamed,unnamed,unnamed,unnamed,unnamed,unnamed,unnamed,unnamed,unnamed,unnamed,unnamed,unnamed,unnamed,unnamed,unnamed,unnamed,unnamed,unnamed,unnamed,unnamed,unnamed,unnamed,unnamed,unnamed,unnamed…	Abi2,Agt,Agtpbp1,Akt3,Alk,Ank3,Ap3m2,Apaf1,Apbb1,Apbb2,Apc2,Arl6,Arnt2,Arpc3,Arsg,Atg7,Atp1a3,Bad,Basp1,Bcan,Bcl2l11,Bdnf,Bid,Brinp1,Brsk2,Btg1,C1qa,Cacng2,Cacng8,Cadm1,Cadps,Cd81,Cdk5r1,Cdk5r2,Cdk5rap2,Cers6,Chd7,Chl1,Chn2,Cit,Ckap5,Ckb,Clcn3,Clstn3,Col4a1,Cox10,Cpeb3,Cplx2,Crmp1,Csf1,Ctnna2,Ctnnb1,Ctnnd1,Ctsb,Cxcr4,Cycs,D430042O09Rik,Dab1,Dag1,Dbn1,Dclk1,Dclk2,Disc1,Dlg4,Dmrta2,Dmxl2,Dpysl4,Drd…
Mouse Phenotype	MP:0000841	abnormal hindbrain morphology	55	2.50605e-30	2.36822e-26	4.30586e-28	1.40012	838.501	1174	0.0726226	0.10168	23	2.99847e-22	2.83355e-18	1.23198e-19	1.52515	211.127	322	552	0.0421025	0.583333	unnamed,unnamed,unnamed,unnamed,unnamed,unnamed,unnamed,unnamed,unnamed,unnamed,unnamed,unnamed,unnamed,unnamed,unnamed,unnamed,unnamed,unnamed,unnamed,unnamed,unnamed,unnamed,unnamed,unnamed,unnamed,unnamed,unnamed,unnamed,unnamed,unnamed,unnamed,unnamed,unnamed,unnamed,unnamed,unnamed,unnamed,unnamed,unnamed,unnamed,unnamed,unnamed,unnamed,unnamed,unnamed,unnamed,unnamed,unnamed,unnamed,unnamed…	Abcd2,Abl1,Abl2,Abr,Adam10,Adamts3,Adgrg1,Aff1,Aga,Agtpbp1,Akt3,Ank1,Ank3,Apaf1,Apc2,App,Arsa,Arsg,Ascl1,Ass1,Astn1,Atf2,Atg7,Atp2b2,Atrn,Atxn1,Atxn2,B4galnt1,B4galt2,Bcl2,Bcl2l1,Bcr,Bdnf,Bhlhe22,Bid,Cacna1a,Cacna1d,Cacna1g,Cacna2d2,Cadps,Cadps2,Calb1,Camk4,Camta1,Cbln1,Ccm2,Ccnd1,Cdk5r1,Cdk5r2,Cend1,Cep120,Cers1,Cit,Clcn2,Cnp,Cntfr,Cntn1,Col18a1,Cp,Crybb2,Ctnna2,Ctnnb1,Ctsb,Cxcl12,Cxcr4,Cyfip2,C…
Mouse Phenotype	MP:0004631	abnormal auditory cortex morphology	56	2.93303e-30	2.77171e-26	4.94948e-28	12.8537	3.11194	40	0.000269525	0.0034644	1930	0.00817849	1	0.0400449	2.61454	1.91238	5	5	0.000653766	1	unnamed,unnamed,unnamed,unnamed,unnamed,unnamed,unnamed,unnamed,unnamed,unnamed,unnamed,unnamed,unnamed,unnamed,unnamed,unnamed,unnamed,unnamed,unnamed,unnamed,unnamed,unnamed,unnamed,unnamed,unnamed,unnamed,unnamed,unnamed,unnamed,unnamed,unnamed,unnamed,unnamed,unnamed,unnamed,unnamed,unnamed,unnamed,unnamed,unnamed	Arhgap33,Atp2b2,Chrm1,Sptbn4,Tuba1a
Mouse Phenotype	MP:0004097	abnormal cerebellar cortex morphology	57	4.47305e-30	4.22703e-26	7.41585e-28	1.5081	545.72	823	0.0472649	0.0712801	123	5.29622e-13	5.00493e-09	4.06905e-11	1.4867	136.544	203	357	0.0265429	0.568627	unnamed,unnamed,unnamed,unnamed,unnamed,unnamed,unnamed,unnamed,unnamed,unnamed,unnamed,unnamed,unnamed,unnamed,unnamed,unnamed,unnamed,unnamed,unnamed,unnamed,unnamed,unnamed,unnamed,unnamed,unnamed,unnamed,unnamed,unnamed,unnamed,unnamed,unnamed,unnamed,unnamed,unnamed,unnamed,unnamed,unnamed,unnamed,unnamed,unnamed,unnamed,unnamed,unnamed,unnamed,unnamed,unnamed,unnamed,unnamed,unnamed,unnamed…	Abcd2,Abl1,Abl2,Abr,Adgrg1,Aff1,Aga,Agtpbp1,Akt3,Ank1,Ank3,Apc2,App,Arsa,Arsg,Ass1,Astn1,Atf2,Atg7,Atp2b2,Atxn1,Atxn2,B4galnt1,B4galt2,Bcr,Bid,Cacna1a,Cacna1g,Cacna2d2,Cadps,Cadps2,Calb1,Camk4,Camta1,Cbln1,Ccnd1,Cdk5r1,Cdk5r2,Cend1,Cep120,Cers1,Cit,Cnp,Cntn1,Cp,Crybb2,Ctnna2,Ctsb,Cxcr4,Dab1,Dab2ip,Dag1,Dclk1,Dnajc3,Dnm1,Dpysl5,Ebf2,Eef1a2,Emx1,En1,En2,Eno2,Erbb3,Erbb4,Fa2h,Fbxo41,Fbxw7,Fgf13,Fgf8…
Mouse Phenotype	MP:0001475	reduced long term depression	58	4.61682e-30	4.3629e-26	7.52224e-28	2.46048	84.5364	208	0.00732171	0.0180149	615	1.46802e-05	0.138728	0.000225573	1.84206	16.829	31	44	0.00405335	0.704546	unnamed,unnamed,unnamed,unnamed,unnamed,unnamed,unnamed,unnamed,unnamed,unnamed,unnamed,unnamed,unnamed,unnamed,unnamed,unnamed,unnamed,unnamed,unnamed,unnamed,unnamed,unnamed,unnamed,unnamed,unnamed,unnamed,unnamed,unnamed,unnamed,unnamed,unnamed,unnamed,unnamed,unnamed,unnamed,unnamed,unnamed,unnamed,unnamed,unnamed,unnamed,unnamed,unnamed,unnamed,unnamed,unnamed,unnamed,unnamed,unnamed,unnamed…	Akap5,Anks1b,Arhgef9,Camk2a,Camk4,Cdk5r1,Chrm1,Cnr1,Cspg5,Emx1,Grid2,Grin2b,Grm1,Grm2,Lrrc7,Myo5a,Ncdn,Plcb4,Ppp1r9b,Ppp3r1,Prex1,Prkar1b,Ptpn4,Ralbp1,Rbfox3,Shank2,Shank3,Slc17a6,Srcin1,Wasf1,Wwc1
Mouse Phenotype	MP:0004811	abnormal neuron physiology	59	5.581e-30	5.27404e-26	8.93906e-28	1.35221	1034.61	1399	0.0896073	0.121167	42	6.50745e-19	6.14954e-15	1.46418e-16	1.42995	260.849	373	682	0.0487709	0.546921	unnamed,unnamed,unnamed,unnamed,unnamed,unnamed,unnamed,unnamed,unnamed,unnamed,unnamed,unnamed,unnamed,unnamed,unnamed,unnamed,unnamed,unnamed,unnamed,unnamed,unnamed,unnamed,unnamed,unnamed,unnamed,unnamed,unnamed,unnamed,unnamed,unnamed,unnamed,unnamed,unnamed,unnamed,unnamed,unnamed,unnamed,unnamed,unnamed,unnamed,unnamed,unnamed,unnamed,unnamed,unnamed,unnamed,unnamed,unnamed,unnamed,unnamed…	Aatk,Abl1,Abl2,Adcyap1,Adgrg1,Akt3,Amph,Apaf1,Apc2,Arfgef2,Ascl1,Ass1,Astn1,Atf1,Atg7,Atp1a3,Atp2b2,Avil,Basp1,Bcl2l1,Bdnf,Bsn,Btg1,Cacna1d,Cacna2d2,Cadps,Cadps2,Calb1,Caprin1,Cask,Cast,Ccdc7a,Ccl2,Cdc42,Cdh2,Cdh23,Cdk5rap2,Cdkn2a,Cdon,Celsr3,Cend1,Cep120,Cers1,Chd7,Chrm4,Chrna9,Cit,Ckap5,Cnr1,Cntnap2,Col25a1,Cpeb3,Cplx2,Crmp1,Ctnnb1,Ctsb,Cux2,Cx3cl1,Cx3cr1,Dab1,Dag1,Dagla,Daglb,Dapk1,Diaph1,Dmrt…
Mouse Phenotype	MP:0002200	abnormal brain ventricular system morphology	60	7.08414e-30	6.69451e-26	1.11575e-27	1.51896	522.067	793	0.0452163	0.0686818	94	2.6794e-14	2.53203e-10	2.69365e-12	1.49306	148.018	221	387	0.0288964	0.571059	unnamed,unnamed,unnamed,unnamed,unnamed,unnamed,unnamed,unnamed,unnamed,unnamed,unnamed,unnamed,unnamed,unnamed,unnamed,unnamed,unnamed,unnamed,unnamed,unnamed,unnamed,unnamed,unnamed,unnamed,unnamed,unnamed,unnamed,unnamed,unnamed,unnamed,unnamed,unnamed,unnamed,unnamed,unnamed,unnamed,unnamed,unnamed,unnamed,unnamed,unnamed,unnamed,unnamed,unnamed,unnamed,unnamed,unnamed,unnamed,unnamed,unnamed…	Acvrl1,Adamts3,Aga,Akt3,Ank2,Apaf1,Apob,Arhgap5,Arl5c,Arl6,Arnt2,Atf2,Atxn1,B4galt2,Basp1,Brsk2,Cables1,Ccm2,Cdc42,Cdk5r1,Cdk5rap2,Cdkn2a,Cdon,Celsr2,Cep120,Cfap54,Chd7,Chl1,Chn1,Clcn3,Clip2,Cntn2,Col10a1,Col18a1,Col1a1,Col4a1,Coro1c,Cp,Crb2,Csf1r,Ctnna1,Ctnnb1,Cycs,D430042O09Rik,Dclk1,Dlg5,Dmrta2,Dnah5,Dnaic1,Drd1,Egln1,Eml1,Emx1,Emx2,En1,Enah,Erbb3,Evl,Fgfr2,Fig4,Fkrp,Foxc1,Foxg1,Foxq1,Frem2,Fu…
Mouse Phenotype	MP:0000947	convulsive seizures	61	8.31177e-30	7.85463e-26	1.28764e-27	1.76427	261.298	461	0.0226311	0.0399272	116	2.71079e-13	2.5617e-09	2.20836e-11	1.70386	68.0808	116	178	0.0151674	0.651685	unnamed,unnamed,unnamed,unnamed,unnamed,unnamed,unnamed,unnamed,unnamed,unnamed,unnamed,unnamed,unnamed,unnamed,unnamed,unnamed,unnamed,unnamed,unnamed,unnamed,unnamed,unnamed,unnamed,unnamed,unnamed,unnamed,unnamed,unnamed,unnamed,unnamed,unnamed,unnamed,unnamed,unnamed,unnamed,unnamed,unnamed,unnamed,unnamed,unnamed,unnamed,unnamed,unnamed,unnamed,unnamed,unnamed,unnamed,unnamed,unnamed,unnamed…	Adam22,Adk,Adora2b,Akt3,Amph,Ank3,Atp1a3,B4galnt1,Bid,Bsn,Cacna1a,Cacna2d2,Cacnb4,Celf4,Chn1,Chrna4,Cit,Clcn3,Cnp,Cntn5,Dclk2,Dnm1,Drd1,Eml1,Emx1,Fosb,Fyn,Gabbr1,Gabbr2,Gabra1,Gad2,Gjb1,Gjc2,Glra1,Gnaq,Gnb5,Gng3,Gng7,Gria2,Grik4,Grin1,Grm5,Grm7,Hdac4,Hlf,Itpr1,Kcna1,Kcna2,Kcnc1,Kcnc2,Kcnj10,Kcnj6,Kcnq2,Kdm1a,Lgi1,Lhx6,Loxl1,Mag,Mbnl2,Mbp,Mcoln3,Msx2,Mt1,Myo3b,Myo5a,Ndufs4,Neurod1,Neurod2,Npas4,Nr…
Mouse Phenotype	MP:0005636	abnormal mineral homeostasis	62	7.78512e-29	7.35694e-25	1.1866e-26	1.50136	535.514	804	0.0463809	0.0696345	552	7.06597e-06	0.0667734	0.000120966	1.24952	190.473	238	498	0.0311193	0.477912	unnamed,unnamed,unnamed,unnamed,unnamed,unnamed,unnamed,unnamed,unnamed,unnamed,unnamed,unnamed,unnamed,unnamed,unnamed,unnamed,unnamed,unnamed,unnamed,unnamed,unnamed,unnamed,unnamed,unnamed,unnamed,unnamed,unnamed,unnamed,unnamed,unnamed,unnamed,unnamed,unnamed,unnamed,unnamed,unnamed,unnamed,unnamed,unnamed,unnamed,unnamed,unnamed,unnamed,unnamed,unnamed,unnamed,unnamed,unnamed,unnamed,unnamed…	2010300C02Rik,A1cf,Abcb10,Abcb11,Aco1,Acvr1b,Add2,Adgrf5,Ajap1,Alb,Ank1,Anxa6,Ap3b1,Ar,Arhgap22,Arhgef7,Asxl1,Atp2b1,Atp6v0a4,Atp6v1h,BC048403,Bach1,Boc,Brms1,Brpf3,Btbd9,C9,Cacna1b,Cacna2d3,Camkmt,Car2,Cast,Ccdc57,Cckbr,Cd84,Cdkal1,Cebpb,Cenpo,Cers5,Chek2,Chn1,Cldn10,Cnnm4,Cp,Cpa2,Csf1,Cul3,Cyb561,Cyb5d1,Cyfip2,Cyp11a1,Cyp17a1,Cyp24a1,Cyp2c44,D1Ertd622e,Daam1,Dapk2,Dbn1,Ddhd1,Dnal4,Dpp9,Dsel,Dus…
Mouse Phenotype	MP:0000192	abnormal mineral level	63	9.00557e-29	8.51027e-25	1.35084e-26	1.50716	523.501	789	0.0453404	0.0683354	598	1.28115e-05	0.121069	0.000202456	1.24528	185.501	231	485	0.030204	0.476289	unnamed,unnamed,unnamed,unnamed,unnamed,unnamed,unnamed,unnamed,unnamed,unnamed,unnamed,unnamed,unnamed,unnamed,unnamed,unnamed,unnamed,unnamed,unnamed,unnamed,unnamed,unnamed,unnamed,unnamed,unnamed,unnamed,unnamed,unnamed,unnamed,unnamed,unnamed,unnamed,unnamed,unnamed,unnamed,unnamed,unnamed,unnamed,unnamed,unnamed,unnamed,unnamed,unnamed,unnamed,unnamed,unnamed,unnamed,unnamed,unnamed,unnamed…	2010300C02Rik,A1cf,Abcb10,Abcb11,Acvr1b,Add2,Adgrf5,Ajap1,Alb,Ank1,Anxa6,Ar,Arhgap22,Arhgef7,Asxl1,Atp2b1,Atp6v0a4,Atp6v1h,BC048403,Bach1,Boc,Brms1,Brpf3,Btbd9,C9,Cacna1b,Cacna2d3,Camkmt,Car2,Cast,Ccdc57,Cckbr,Cd84,Cdkal1,Cebpb,Cenpo,Cers5,Chek2,Chn1,Cldn10,Cnnm4,Cp,Cpa2,Csf1,Cul3,Cyb561,Cyb5d1,Cyfip2,Cyp11a1,Cyp17a1,Cyp24a1,Cyp2c44,D1Ertd622e,Daam1,Dapk2,Dbn1,Ddhd1,Dnal4,Dpp9,Dsel,Dusp4,Dync1i2,…
Mouse Phenotype	MP:0009538	abnormal synapse morphology	64	1.60918e-28	1.52068e-24	2.37606e-26	1.62405	358.364	582	0.0310379	0.0504071	111	2.08127e-13	1.9668e-09	1.77189e-11	1.66498	76.8778	128	201	0.0167364	0.636816	unnamed,unnamed,unnamed,unnamed,unnamed,unnamed,unnamed,unnamed,unnamed,unnamed,unnamed,unnamed,unnamed,unnamed,unnamed,unnamed,unnamed,unnamed,unnamed,unnamed,unnamed,unnamed,unnamed,unnamed,unnamed,unnamed,unnamed,unnamed,unnamed,unnamed,unnamed,unnamed,unnamed,unnamed,unnamed,unnamed,unnamed,unnamed,unnamed,unnamed,unnamed,unnamed,unnamed,unnamed,unnamed,unnamed,unnamed,unnamed,unnamed,unnamed…	Adarb1,Agrn,Ap3m2,Aplp2,App,Arhgef6,Arpc3,Basp1,Bsn,Cacna1a,Cacna2d2,Cacnb4,Cacng2,Cadps,Camk2a,Caprin1,Cbln1,Chrna1,Clcn3,Col13a1,Colq,Cpeb4,Dact1,Dag1,Dctn1,Dlg3,Dmd,Dnajc6,Dnm1,Dnm3,Dnmt3a,Dst,Dtna,Ednrb,Eef1a2,Egr2,En1,Erc2,Fat1,Fbxo45,Fgfr2,Gabbr2,Gabra1,Gabrg2,Gars,Gas7,Gdap1,Gpt2,Grid2,Grik4,Grin2b,Grm7,Itgb1,Kalrn,Kif1a,Kif1b,Ldlr,Lmx1a,Lmx1b,Lrfn2,Lrp1,Lrp4,Lrrtm1,Madd,Map6,Mapt,Mbnl1,Mb…
Mouse Phenotype	MP:0009956	abnormal cerebellar layer morphology	65	2.43831e-28	2.3042e-24	3.54492e-26	1.53574	467.527	718	0.0404926	0.062186	158	2.64431e-11	2.49887e-07	1.58157e-09	1.47529	122.01	180	319	0.0235356	0.564263	unnamed,unnamed,unnamed,unnamed,unnamed,unnamed,unnamed,unnamed,unnamed,unnamed,unnamed,unnamed,unnamed,unnamed,unnamed,unnamed,unnamed,unnamed,unnamed,unnamed,unnamed,unnamed,unnamed,unnamed,unnamed,unnamed,unnamed,unnamed,unnamed,unnamed,unnamed,unnamed,unnamed,unnamed,unnamed,unnamed,unnamed,unnamed,unnamed,unnamed,unnamed,unnamed,unnamed,unnamed,unnamed,unnamed,unnamed,unnamed,unnamed,unnamed…	Abcd2,Abl1,Abl2,Abr,Aff1,Aga,Agtpbp1,Akt3,Ank1,Ank3,Apc2,App,Arsa,Arsg,Ass1,Astn1,Atf2,Atg7,Atp2b2,Atxn1,Atxn2,B4galnt1,B4galt2,Bcr,Bid,Cacna1a,Cacna1g,Cacna2d2,Cadps,Cadps2,Calb1,Camk4,Camta1,Cbln1,Ccnd1,Cdk5r1,Cdk5r2,Cend1,Cers1,Cit,Cnp,Cntn1,Cp,Crybb2,Ctnna2,Ctsb,Cxcr4,Dab1,Dab2ip,Dnajc3,Dnm1,Dpysl5,Ebf2,Eef1a2,En1,En2,Eno2,Erbb3,Erbb4,Fa2h,Fbxo41,Fbxw7,Fgf13,Fgf8,Gabra1,Gas1,Gba,Gja1,Gjc2,Gli…
Mouse Phenotype	MP:0002885	abnormal AMPA-mediated synaptic currents	66	9.32445e-28	8.81161e-24	1.33509e-25	2.81251	53.6887	151	0.00464999	0.0130781	470	1.71079e-06	0.0161669	3.43978e-05	2.1085	11.8568	25	31	0.00326883	0.806452	unnamed,unnamed,unnamed,unnamed,unnamed,unnamed,unnamed,unnamed,unnamed,unnamed,unnamed,unnamed,unnamed,unnamed,unnamed,unnamed,unnamed,unnamed,unnamed,unnamed,unnamed,unnamed,unnamed,unnamed,unnamed,unnamed,unnamed,unnamed,unnamed,unnamed,unnamed,unnamed,unnamed,unnamed,unnamed,unnamed,unnamed,unnamed,unnamed,unnamed,unnamed,unnamed,unnamed,unnamed,unnamed,unnamed,unnamed,unnamed,unnamed,unnamed…	Adarb1,Akap5,Arc,Cacng2,Cacng8,Cnih2,Cnih3,Dlg4,Ext1,Gria1,Gria2,Grin1,Grin2b,Kalrn,Lgi1,Mapk8ip2,Neurod6,Nlgn3,Nrxn2,Nrxn3,Ppp1r9b,Slc17a6,Stx1b,Syngap1,Tyr
Mouse Phenotype	MP:0001898	abnormal long term depression	67	1.4578e-27	1.37762e-23	2.05615e-25	1.853	198.057	367	0.0171537	0.0317859	140	6.05018e-12	5.71742e-08	4.08387e-10	1.89421	37.4827	71	98	0.00928347	0.72449	unnamed,unnamed,unnamed,unnamed,unnamed,unnamed,unnamed,unnamed,unnamed,unnamed,unnamed,unnamed,unnamed,unnamed,unnamed,unnamed,unnamed,unnamed,unnamed,unnamed,unnamed,unnamed,unnamed,unnamed,unnamed,unnamed,unnamed,unnamed,unnamed,unnamed,unnamed,unnamed,unnamed,unnamed,unnamed,unnamed,unnamed,unnamed,unnamed,unnamed,unnamed,unnamed,unnamed,unnamed,unnamed,unnamed,unnamed,unnamed,unnamed,unnamed…	Adgrb3,Akap5,Anks1b,Arhgef6,Arhgef9,C1ql1,Camk2a,Camk2b,Camk4,Cbln1,Cdk5r1,Chrm1,Cnr1,Cpeb3,Cspg5,Dagla,Dpysl5,Efnb2,Emx1,Gnaq,Gria1,Gria2,Gria3,Grid2,Grin1,Grin2b,Grip1,Grip2,Grm1,Grm2,Gsk3a,Gsk3b,Iqsec1,Itpr1,Lmx1b,Lrrc7,Myo5a,Ncam1,Ncdn,Nlgn3,Nos1,Nr3c1,Nrgn,Park7,Pick1,Plat,Plcb4,Ppp1r9b,Ppp3r1,Prex1,Prkacb,Prkar1b,Prkg1,Ptpn4,Ralbp1,Rarb,Rbfox3,Rgs9,Rims1,Shank2,Shank3,Slc17a6,Slc24a2,Slc8a2…
Mouse Phenotype	MP:0002207	abnormal long term potentiation	68	3.27411e-27	3.09403e-23	4.55005e-25	1.53507	449.49	690	0.0389304	0.059761	26	1.15233e-21	1.08895e-17	4.18827e-19	1.79408	91.4119	164	239	0.0214435	0.686192	unnamed,unnamed,unnamed,unnamed,unnamed,unnamed,unnamed,unnamed,unnamed,unnamed,unnamed,unnamed,unnamed,unnamed,unnamed,unnamed,unnamed,unnamed,unnamed,unnamed,unnamed,unnamed,unnamed,unnamed,unnamed,unnamed,unnamed,unnamed,unnamed,unnamed,unnamed,unnamed,unnamed,unnamed,unnamed,unnamed,unnamed,unnamed,unnamed,unnamed,unnamed,unnamed,unnamed,unnamed,unnamed,unnamed,unnamed,unnamed,unnamed,unnamed…	Adcy1,Adcyap1r1,Add2,Adk,Aff2,Akap5,Ap3m2,App,Arc,Arhgef6,Arhgef9,Asic1,Atxn1,B3gat1,Baiap2,Bcan,Bdnf,Btbd9,Cacna1b,Cacnb3,Cacng8,Calb2,Camk2a,Camk2b,Camkk2,Cdk5r1,Chrna2,Chst10,Ckap5,Clstn1,Cnih2,Cnih3,Cnr1,Cplx2,Crmp1,Ctnnb1,Ctnnd2,Dag1,Disc1,Dlg3,Dlg4,Doc2a,Dpp6,Dpysl4,Drd1,Efna3,Efnb2,Elfn1,Emx1,Epha4,Erbb4,Esr2,Fos,Fyn,Gabbr1,Gal,Gnai1,Grasp,Gria1,Gria2,Gria3,Grik1,Grik3,Grik4,Grin1,Grin2a,G…
Mouse Phenotype	MP:0005195	abnormal posterior eye segment morphology	69	3.36352e-27	3.17852e-23	4.60656e-25	1.33122	1047.16	1394	0.0906946	0.120734	85	4.99126e-15	4.71674e-11	5.54911e-13	1.35051	300.627	406	786	0.0530858	0.516539	unnamed,unnamed,unnamed,unnamed,unnamed,unnamed,unnamed,unnamed,unnamed,unnamed,unnamed,unnamed,unnamed,unnamed,unnamed,unnamed,unnamed,unnamed,unnamed,unnamed,unnamed,unnamed,unnamed,unnamed,unnamed,unnamed,unnamed,unnamed,unnamed,unnamed,unnamed,unnamed,unnamed,unnamed,unnamed,unnamed,unnamed,unnamed,unnamed,unnamed,unnamed,unnamed,unnamed,unnamed,unnamed,unnamed,unnamed,unnamed,unnamed,unnamed…	2900026A02Rik,Abca1,Abca4,Abcb11,Actn4,Adam9,Adamts3,Adgrf5,Adrb2,Agap1,Agtpbp1,Ahcyl1,Aipl1,Alcam,Aldh1a1,Angpt2,Ank2,Ankrd11,Ankrd27,Anxa3,Apaf1,Apob,Arf3,Arhgap25,Arhgap33,Arhgef11,Arhgef15,Arl3,Arl6,Ascc2,Ascl1,Asic2,Asxl1,Atoh7,Atp5g2,Atp8a2,Barhl2,Bbs10,Bcar3,Bcl2,Bdnf,Best1,Bhlhe22,Bhlhe23,Bmp4,Bmp7,Bmper,Bsn,Cacna2d4,Cacnb2,Casq2,Ccl2,Ccm2,Ccnd1,Ccnd3,Ccr2,Cd46,Cd82,Cdh13,Cdh5,Cdkn1c,Cdkn…
Mouse Phenotype	MP:0000920	abnormal myelination	70	3.53955e-27	3.34488e-23	4.7784e-25	1.74303	249.566	435	0.0216149	0.0376754	162	3.23068e-11	3.05299e-07	1.88456e-09	1.60288	76.1128	122	199	0.0159519	0.613065	unnamed,unnamed,unnamed,unnamed,unnamed,unnamed,unnamed,unnamed,unnamed,unnamed,unnamed,unnamed,unnamed,unnamed,unnamed,unnamed,unnamed,unnamed,unnamed,unnamed,unnamed,unnamed,unnamed,unnamed,unnamed,unnamed,unnamed,unnamed,unnamed,unnamed,unnamed,unnamed,unnamed,unnamed,unnamed,unnamed,unnamed,unnamed,unnamed,unnamed,unnamed,unnamed,unnamed,unnamed,unnamed,unnamed,unnamed,unnamed,unnamed,unnamed…	Adam22,Adgrg6,Afg3l1,App,Arsa,Atp8a2,Atrn,C3ar1,Cacna2d2,Cadm3,Cadm4,Ccl2,Cln8,Cnp,Col1a1,Cp,Csf1,Csf1r,Cx3cr1,Dag1,Ddit4,Dlg1,Dst,Eef1a2,Egr2,Emx1,Epb41l3,Erbb3,Erbb4,Erbin,Fa2h,Fasl,Fdft1,Fig4,Foxg1,Fyn,Gabbr1,Gal3st1,Galc,Gars,Gdap1,Gjb1,Gjc2,Gjc3,Gpm6b,Gpr17,Grid2,Hexb,Hpn,Igf1r,Il1b,Itgb1,Kcnj10,Kif14,Lamc1,Large1,Lbr,Lingo1,Lmna,Lpin1,Mag,Mal,Map1b,Mbp,Mgat5b,Mobp,Mog,Mtmr2,Myrf,Nab1,Nab2,N…
Mouse Phenotype	MP:0002888	abnormal NMDA-mediated synaptic currents	71	5.72012e-27	5.40551e-23	7.6134e-25	3.16755	38.5155	122	0.00333583	0.0105664	821	0.000101314	0.957413	0.00116615	1.91733	11.4743	22	30	0.00287657	0.733333	unnamed,unnamed,unnamed,unnamed,unnamed,unnamed,unnamed,unnamed,unnamed,unnamed,unnamed,unnamed,unnamed,unnamed,unnamed,unnamed,unnamed,unnamed,unnamed,unnamed,unnamed,unnamed,unnamed,unnamed,unnamed,unnamed,unnamed,unnamed,unnamed,unnamed,unnamed,unnamed,unnamed,unnamed,unnamed,unnamed,unnamed,unnamed,unnamed,unnamed,unnamed,unnamed,unnamed,unnamed,unnamed,unnamed,unnamed,unnamed,unnamed,unnamed…	Cacnb3,Clstn1,Dapk1,Dlg4,Dlgap3,Emx1,Eps8,Fosb,Grik4,Grin1,Grin2a,Grin2b,Lgi1,Mapk8ip1,Mapk8ip2,Nrxn2,Nrxn3,Rgs9,Shank3,Slc6a9,Tyr,Wasf1
Mouse Phenotype	MP:0001490	abnormal vibrissae reflex	72	6.04501e-27	5.71254e-23	7.93408e-25	6.80966	7.92992	54	0.000686811	0.00467694	3380	0.0742355	1	0.207552	2.09163	1.91238	4	5	0.000523013	0.8	unnamed,unnamed,unnamed,unnamed,unnamed,unnamed,unnamed,unnamed,unnamed,unnamed,unnamed,unnamed,unnamed,unnamed,unnamed,unnamed,unnamed,unnamed,unnamed,unnamed,unnamed,unnamed,unnamed,unnamed,unnamed,unnamed,unnamed,unnamed,unnamed,unnamed,unnamed,unnamed,unnamed,unnamed,unnamed,unnamed,unnamed,unnamed,unnamed,unnamed,unnamed,unnamed,unnamed,unnamed,unnamed,unnamed,unnamed,unnamed,unnamed,unnamed…	Atp2b2,Hoxb1,Ntrk2,Pparg
Mouse Phenotype	MP:0001473	reduced long term potentiation	73	6.20308e-27	5.86191e-23	8.03002e-25	1.68267	287.637	484	0.0249123	0.0419193	45	1.53487e-17	1.45046e-13	3.22324e-15	1.87711	59.6663	112	156	0.0146444	0.717949	unnamed,unnamed,unnamed,unnamed,unnamed,unnamed,unnamed,unnamed,unnamed,unnamed,unnamed,unnamed,unnamed,unnamed,unnamed,unnamed,unnamed,unnamed,unnamed,unnamed,unnamed,unnamed,unnamed,unnamed,unnamed,unnamed,unnamed,unnamed,unnamed,unnamed,unnamed,unnamed,unnamed,unnamed,unnamed,unnamed,unnamed,unnamed,unnamed,unnamed,unnamed,unnamed,unnamed,unnamed,unnamed,unnamed,unnamed,unnamed,unnamed,unnamed…	Adcy1,Adcyap1r1,Add2,Akap5,App,Arc,Arhgef6,Atxn1,B3gat1,Bdnf,Cacna1b,Cacng8,Calb2,Camk2a,Camk2b,Cdk5r1,Chst10,Ckap5,Cnih2,Cnih3,Cplx2,Ctnnb1,Dag1,Disc1,Doc2a,Dpysl4,Efna3,Efnb2,Elfn1,Emx1,Epha4,Esr2,Fos,Fyn,Gabbr1,Grasp,Gria1,Grik3,Grik4,Grin1,Grin2a,Grin2b,Grm1,Grm5,Grn,Igsf11,Itga3,Itga8,Itm2b,Jph3,Kalrn,Kcnn2,Ksr1,Lrp1,Lrp8,Mapk3,Mapk9,Mapt,Mbnl2,Ncam1,Ncdn,Ncf1,Neto1,Neurod6,Nos1,Nrxn3,Ntrk2,…
Mouse Phenotype	MP:0008250	abnormal myeloid leukocyte morphology	74	8.78786e-27	8.30453e-23	1.12223e-24	1.33642	1004.18	1342	0.0869718	0.116231	87	1.05327e-14	9.95341e-11	1.14407e-12	1.30727	376.357	492	984	0.0643305	0.5	unnamed,unnamed,unnamed,unnamed,unnamed,unnamed,unnamed,unnamed,unnamed,unnamed,unnamed,unnamed,unnamed,unnamed,unnamed,unnamed,unnamed,unnamed,unnamed,unnamed,unnamed,unnamed,unnamed,unnamed,unnamed,unnamed,unnamed,unnamed,unnamed,unnamed,unnamed,unnamed,unnamed,unnamed,unnamed,unnamed,unnamed,unnamed,unnamed,unnamed,unnamed,unnamed,unnamed,unnamed,unnamed,unnamed,unnamed,unnamed,unnamed,unnamed…	1700024P04Rik,1810011O10Rik,3110043O21Rik,4930404H24Rik,Abca1,Abcd2,Abcg1,Abcg5,Abhd5,Actl6a,Ada,Adam10,Adgrb1,Adgrf5,Adrb2,Afg3l1,Agap1,Agr2,Akna,Alg13,Ank,Ank1,Ankrd11,Ankrd27,Ap3b1,Apc,App,Ar,Arg1,Arhgap15,Arhgap22,Arhgap25,Arhgef1,Armc7,Arntl,Arsa,Arsg,Asxl1,Atg16l1,Atp1a3,Atp2a2,Atp6v1h,B4galnt1,B4galnt2,B4galt1,B9d2,Bach2,Bag3,Bap1,Batf3,Bcl2l11,Bcl6b,Bcr,Birc3,Bmp1,Bmp7,C3ar1,C4b,Camk4,Cap…
Mouse Phenotype	MP:0002918	abnormal paired-pulse facilitation	75	1.08791e-26	1.02807e-22	1.37076e-24	2.08445	125.213	261	0.0108447	0.0226052	272	1.35357e-08	0.000127912	4.70264e-07	1.83357	29.4507	54	77	0.00706067	0.701299	unnamed,unnamed,unnamed,unnamed,unnamed,unnamed,unnamed,unnamed,unnamed,unnamed,unnamed,unnamed,unnamed,unnamed,unnamed,unnamed,unnamed,unnamed,unnamed,unnamed,unnamed,unnamed,unnamed,unnamed,unnamed,unnamed,unnamed,unnamed,unnamed,unnamed,unnamed,unnamed,unnamed,unnamed,unnamed,unnamed,unnamed,unnamed,unnamed,unnamed,unnamed,unnamed,unnamed,unnamed,unnamed,unnamed,unnamed,unnamed,unnamed,unnamed…	Add2,Apba1,Apba2,Atxn1,Cacna1a,Cadps2,Camk2a,Chrm1,Cnr1,Cspg5,Dlg4,Emx1,Gria2,Grik3,Grik4,Grik5,Grm4,Kcna1,Mapk9,Mapt,Mef2a,Mef2c,Mef2d,Pfn2,Psen1,Ptn,Ptprd,Rab3a,Rab3c,Rab3gap1,Rap1a,Rap1b,Rbfox3,Rims1,Rnf112,Rock2,Sirpa,Slc8a2,Snap25,Snph,Spred1,Ston2,Stx1a,Stxbp5,Syn1,Syngr1,Syp,Syt2,Tnik,Uchl1,Unc13c,Vamp2,Vdac1,Vdac3
Mouse Phenotype	MP:0003224	neuron degeneration	76	1.09568e-26	1.03542e-22	1.3624e-24	1.48153	531.883	788	0.0460665	0.0682487	267	1.06476e-08	0.00010062	3.76854e-07	1.36855	146.871	201	384	0.0262814	0.523438	unnamed,unnamed,unnamed,unnamed,unnamed,unnamed,unnamed,unnamed,unnamed,unnamed,unnamed,unnamed,unnamed,unnamed,unnamed,unnamed,unnamed,unnamed,unnamed,unnamed,unnamed,unnamed,unnamed,unnamed,unnamed,unnamed,unnamed,unnamed,unnamed,unnamed,unnamed,unnamed,unnamed,unnamed,unnamed,unnamed,unnamed,unnamed,unnamed,unnamed,unnamed,unnamed,unnamed,unnamed,unnamed,unnamed,unnamed,unnamed,unnamed,unnamed…	Abca4,Abcd2,Adarb1,Aff1,Aga,Agtpbp1,Aipl1,Ank1,Ank3,Apaf1,App,Ar,Arsa,Atg7,Atp2b2,Atp8a2,Atp8b1,Atxn1,B4galnt1,Barhl1,Bbs10,Bcl2,Cacna1a,Cacna1d,Cacna2d2,Cacnb2,Camta1,Ccl2,Ccr2,Cd46,Cdh23,Cers1,Clcn2,Clcn3,Cldn11,Cldn14,Clic5,Cln8,Cmah,Cnga3,Col25a1,Cox10,Cp,Crocc,Csf1r,Ctnna1,Ctsb,Cx3cr1,Dctn1,Dnajc3,Dock2,Dst,Dync1h1,Ednrb,Eef1a2,Egr3,Elovl4,Emx1,En1,Erbb3,Esr2,Faah,Fasl,Fbxo2,Fig4,Flt1,Foxg1,…
Mouse Phenotype	MP:0000788	abnormal cerebral cortex morphology	77	1.6589e-26	1.56766e-22	2.03593e-24	1.43541	631.878	907	0.054727	0.0785553	73	1.79777e-15	1.69889e-11	2.32725e-13	1.52056	145.341	221	380	0.0288964	0.581579	unnamed,unnamed,unnamed,unnamed,unnamed,unnamed,unnamed,unnamed,unnamed,unnamed,unnamed,unnamed,unnamed,unnamed,unnamed,unnamed,unnamed,unnamed,unnamed,unnamed,unnamed,unnamed,unnamed,unnamed,unnamed,unnamed,unnamed,unnamed,unnamed,unnamed,unnamed,unnamed,unnamed,unnamed,unnamed,unnamed,unnamed,unnamed,unnamed,unnamed,unnamed,unnamed,unnamed,unnamed,unnamed,unnamed,unnamed,unnamed,unnamed,unnamed…	Abi2,Abl1,Abl2,Adcy1,Adgrg1,Ap3b1,Apaf1,Apbb1,Apbb2,Apc2,Arfgef2,Arhgap33,Arhgap5,Arl6,Atg7,Atp2b2,Atrn,B4galt2,Basp1,Bdnf,Bhlhe22,Brinp1,Brsk2,Cadm1,Cd40lg,Cd81,Cdc42,Cdh2,Cdk5r1,Cdk5r2,Cdk5rap2,Cdon,Celsr3,Cep120,Cfap54,Chd7,Chek2,Chl1,Chn1,Clcn3,Cnr1,Cntn6,Col4a1,Cox10,Crmp1,Ctnna1,Ctnnb1,Cux2,Cxcr4,Cycs,Dab1,Dag1,Dbx1,Dclk1,Diaph1,Disc1,Dlg3,Dmrta2,Dnah5,Dock3,Dpysl2,Drd1,Dyrk1a,Eml1,Emx1,Emx…
Mouse Phenotype	MP:0002065	abnormal fear/anxiety-related behavior	78	1.87155e-26	1.76861e-22	2.26745e-24	1.43579	629.617	904	0.0545312	0.0782955	46	1.70681e-17	1.61294e-13	3.50639e-15	1.56312	142.664	223	373	0.0291579	0.597855	unnamed,unnamed,unnamed,unnamed,unnamed,unnamed,unnamed,unnamed,unnamed,unnamed,unnamed,unnamed,unnamed,unnamed,unnamed,unnamed,unnamed,unnamed,unnamed,unnamed,unnamed,unnamed,unnamed,unnamed,unnamed,unnamed,unnamed,unnamed,unnamed,unnamed,unnamed,unnamed,unnamed,unnamed,unnamed,unnamed,unnamed,unnamed,unnamed,unnamed,unnamed,unnamed,unnamed,unnamed,unnamed,unnamed,unnamed,unnamed,unnamed,unnamed…	Adamts7,Adcy1,Adcyap1,Adcyap1r1,Adgrl3,Adora1,Akap11,Akap5,Alk,Apba2,App,Arc,Arhgef9,Arid3a,Arsg,Atmin,Atp1a1,Atp1a3,Avpr1a,B3galt2,B4galt5,Bdnf,Brinp1,Cacna1b,Cacna1e,Cacnb4,Cadps2,Camk2a,Camk2b,Camk4,Camkmt,Cckbr,Cdk5r1,Cer1,Cers1,Chd6,Chl1,Chrna4,Chrnb2,Chst14,Ckap5,Clcn6,Cnr1,Cpeb3,Cplx2,Crebbp,Crebrf,Crhr1,Crhr2,Csf1r,Csgalnact1,Csmd1,Ctnnb1,Cyfip2,Dao,Dcdc2a,Ddc,Ddr1,Deaf1,Disc1,Dixdc1,Dlg4…
Mouse Phenotype	MP:0002752	abnormal somatic nervous system morphology	79	2.40674e-26	2.27437e-22	2.87894e-24	1.26705	1464.82	1856	0.126868	0.160748	9	7.73725e-29	7.3117e-25	8.12412e-26	1.44748	374.445	542	979	0.0708682	0.553626	unnamed,unnamed,unnamed,unnamed,unnamed,unnamed,unnamed,unnamed,unnamed,unnamed,unnamed,unnamed,unnamed,unnamed,unnamed,unnamed,unnamed,unnamed,unnamed,unnamed,unnamed,unnamed,unnamed,unnamed,unnamed,unnamed,unnamed,unnamed,unnamed,unnamed,unnamed,unnamed,unnamed,unnamed,unnamed,unnamed,unnamed,unnamed,unnamed,unnamed,unnamed,unnamed,unnamed,unnamed,unnamed,unnamed,unnamed,unnamed,unnamed,unnamed…	Abca4,Abcd2,Acsm4,Actg1,Actn4,Acvr1b,Adamts3,Adarb1,Adcy3,Adgrg6,Adrb2,Afg3l1,Agrn,Agtpbp1,Aipl1,Alcam,Alpl,Ank2,Ankrd6,Apaf1,Aplp2,App,Ar,Arl3,Arl6,Arsa,Ascl1,Atf2,Atg16l1,Atg7,Atoh7,Atp2b2,Atp8a2,Atp8b1,Avil,Barhl1,Barhl2,Basp1,Bbs10,Bcar3,Bcl11a,Bcl2,Bcl2l11,Bdnf,Bhlhe22,Bhlhe23,Bmp4,Brsk2,Bsn,Cacna1d,Cacna1s,Cacna2d2,Cacnb2,Cacnb3,Cacnb4,Cacng2,Camk2a,Ccl2,Ccr2,Cd44,Cd46,Cd5,Cdh23,Cdkn2a,Cfh,…
Mouse Phenotype	MP:0010025	decreased total body fat amount	80	2.5213e-26	2.38263e-22	2.97828e-24	1.5567	404.702	630	0.0350513	0.0545643	166	4.96027e-11	4.68745e-07	2.82377e-09	1.42736	145.724	208	381	0.0271966	0.545932	unnamed,unnamed,unnamed,unnamed,unnamed,unnamed,unnamed,unnamed,unnamed,unnamed,unnamed,unnamed,unnamed,unnamed,unnamed,unnamed,unnamed,unnamed,unnamed,unnamed,unnamed,unnamed,unnamed,unnamed,unnamed,unnamed,unnamed,unnamed,unnamed,unnamed,unnamed,unnamed,unnamed,unnamed,unnamed,unnamed,unnamed,unnamed,unnamed,unnamed,unnamed,unnamed,unnamed,unnamed,unnamed,unnamed,unnamed,unnamed,unnamed,unnamed…	2300002M23Rik,Adcy3,Adgrf5,Adpgk,Afap1l2,Agt,Ahcyl1,Aldob,Alpl,Angptl2,Ankrd9,Anks1b,Aplp2,Arntl,Arpc2,Arrb1,Atn1,Atp6v0a1,Atp8b2,Atrn,Baz1a,Bhlhe40,Bscl2,Bub1b,Bub3,Bzw2,Camkk2,Cd84,Cers6,Chd2,Chd7,Chn1,Cldn19,Cmtm5,Cnr1,Col1a1,Commd9,Cp,Crhr2,Crtc3,Cry2,Ctsk,Cux1,Cyb5d1,Cyp20a1,Cyp7b1,D630045J12Rik,Dbn1,Dio2,Dlg3,Dll1,Dnajc7,Dusp1,Dync1i2,E2f1,Edn2,Elmod1,Enc1,Esco1,Esyt3,Far2,Fasn,Fech,Foxa2,F…
Mouse Phenotype	MP:0002062	abnormal associative learning	81	3.65898e-26	3.45773e-22	4.2688e-24	1.48248	519.399	770	0.0449852	0.0666898	68	5.24634e-16	4.95779e-12	7.29087e-14	1.6002	114.361	183	299	0.0239278	0.61204	unnamed,unnamed,unnamed,unnamed,unnamed,unnamed,unnamed,unnamed,unnamed,unnamed,unnamed,unnamed,unnamed,unnamed,unnamed,unnamed,unnamed,unnamed,unnamed,unnamed,unnamed,unnamed,unnamed,unnamed,unnamed,unnamed,unnamed,unnamed,unnamed,unnamed,unnamed,unnamed,unnamed,unnamed,unnamed,unnamed,unnamed,unnamed,unnamed,unnamed,unnamed,unnamed,unnamed,unnamed,unnamed,unnamed,unnamed,unnamed,unnamed,unnamed…	Abi2,Adcy1,Adcyap1r1,Add2,Adk,Aff2,Amph,Ankfn1,Apbb1,App,Arc,Arsa,Arsg,Asic1,Atp1a3,Atxn1,Bdnf,Btbd9,Btg1,Cacna1b,Cacnb3,Camk2a,Camk2b,Camk4,Camkk1,Camkmt,Ccl2,Ccl3,Ccr2,Cd47,Chrm3,Chrna4,Chrnb2,Clip2,Cnr1,Cpeb3,Ctnna2,Ctnnb1,Ctnnd2,Dbn1,Disc1,Dlg4,Doc2a,Drd1,Dtnbp1,Dyrk1a,Efna3,Emx1,Eno2,Epha6,Erbb4,Esr1,Esr2,Fam20c,Fez1,Fgf13,Fos,Fyn,Fzd3,Gabbr1,Gabbr2,Gabra1,Gabrb1,Gabrd,Gad2,Galr1,Ghsr,Gnai1,…
Mouse Phenotype	MP:0005404	abnormal axon morphology	82	4.10809e-26	3.88215e-22	4.73433e-24	1.61762	333.207	539	0.028859	0.0466828	173	6.79945e-11	6.42548e-07	3.71415e-09	1.56163	84.5273	132	221	0.0172594	0.597285	unnamed,unnamed,unnamed,unnamed,unnamed,unnamed,unnamed,unnamed,unnamed,unnamed,unnamed,unnamed,unnamed,unnamed,unnamed,unnamed,unnamed,unnamed,unnamed,unnamed,unnamed,unnamed,unnamed,unnamed,unnamed,unnamed,unnamed,unnamed,unnamed,unnamed,unnamed,unnamed,unnamed,unnamed,unnamed,unnamed,unnamed,unnamed,unnamed,unnamed,unnamed,unnamed,unnamed,unnamed,unnamed,unnamed,unnamed,unnamed,unnamed,unnamed…	Aatk,Abcd2,Adgrg6,Aga,Agrn,Ank2,Ank3,Arsa,Basp1,Bcl11a,C1qa,Cacna1a,Cacna2d2,Cadm4,Cadps,Camkk1,Camkk2,Cd47,Cdc42,Chl1,Clcn2,Clcn6,Cldn11,Cnp,Dag1,Dclk1,Dlg3,Dst,Efnb2,Egln3,Egr2,Emx1,En1,Epb41l3,Epha4,Epha7,Ephb2,Ephb3,Erbb3,Erbin,Fa2h,Fezf2,Fgf13,Fig4,Gabbr1,Gal3st1,Galc,Gap43,Gars,Gjb1,Gldn,Gpm6b,Grm7,Hepacam,Isl1,Islr2,Kidins220,Kif2a,Klc1,Ldlr,Lmna,Lmx1a,Lmx1b,Lpin1,Lrrk2,Maf,Mag,Map1a,Map1b…
Mouse Phenotype	MP:0008248	abnormal mononuclear phagocyte morphology	83	4.56589e-26	4.31476e-22	5.19851e-24	1.41188	685.611	968	0.0593808	0.0838386	121	3.88419e-13	3.67056e-09	3.03352e-11	1.35452	253.964	344	664	0.0449791	0.518072	unnamed,unnamed,unnamed,unnamed,unnamed,unnamed,unnamed,unnamed,unnamed,unnamed,unnamed,unnamed,unnamed,unnamed,unnamed,unnamed,unnamed,unnamed,unnamed,unnamed,unnamed,unnamed,unnamed,unnamed,unnamed,unnamed,unnamed,unnamed,unnamed,unnamed,unnamed,unnamed,unnamed,unnamed,unnamed,unnamed,unnamed,unnamed,unnamed,unnamed,unnamed,unnamed,unnamed,unnamed,unnamed,unnamed,unnamed,unnamed,unnamed,unnamed…	1700024P04Rik,1810011O10Rik,4930404H24Rik,Abca1,Abcd2,Abcg1,Actl6a,Ada,Adgrb1,Adgrf5,Adrb2,Afg3l1,Agap1,Ank,Ankrd11,Ap3b1,Apc,App,Ar,Arg1,Arhgap15,Arhgap22,Arhgef1,Armc7,Arntl,Arsa,Arsg,Asxl1,Atg16l1,Atp1a3,Atp2a2,Atp6v1h,B4galnt1,B9d2,Bach2,Bap1,Batf3,Bcl2l11,Bcl6b,Bcr,Birc3,Bmp1,Bmp7,C3ar1,C4b,Camk4,Capn11,Cartpt,Casp8,Cast,Ccbe1,Ccl2,Ccm2,Ccr2,Ccr3,Cd40,Cd40lg,Cd44,Cd47,Cd74,Cd81,Cd9,Cdkn2b,Ce…
Mouse Phenotype	MP:0008503	abnormal spinal cord grey matter morphology	84	3.3399e-25	3.15621e-21	3.75739e-23	1.57779	361.898	571	0.031344	0.0494544	77	2.28783e-15	2.162e-11	2.80779e-13	1.66481	89.4995	149	234	0.0194822	0.636752	unnamed,unnamed,unnamed,unnamed,unnamed,unnamed,unnamed,unnamed,unnamed,unnamed,unnamed,unnamed,unnamed,unnamed,unnamed,unnamed,unnamed,unnamed,unnamed,unnamed,unnamed,unnamed,unnamed,unnamed,unnamed,unnamed,unnamed,unnamed,unnamed,unnamed,unnamed,unnamed,unnamed,unnamed,unnamed,unnamed,unnamed,unnamed,unnamed,unnamed,unnamed,unnamed,unnamed,unnamed,unnamed,unnamed,unnamed,unnamed,unnamed,unnamed…	3110043O21Rik,Adarb1,Alcam,Apaf1,Ar,Ascl1,Atg7,Atp8a2,Bcl11a,Bcl2,Bhlhe22,Cacna1s,Cacna2d2,Cacnb4,Cacng2,Cdk5r1,Cdk5r2,Chn1,Chrna1,Cln8,Cntfr,Cntn2,Col25a1,Cp,Cpeb4,Crlf1,Ctnnb1,Cux2,Dbx1,Dctn1,Dll1,Dnmt3a,Dync1h1,Dync2h1,Eef1a2,Egr2,Egr3,En1,Epg5,Epha4,Erbb3,Erbb4,Etv4,Evx1,Faah,Fbxo45,Fgfr1,Fig4,Frzb,Fuz,Gars,Gas7,Gbx1,Gbx2,Gdap1,Gdf7,Gdnf,Gdpd5,Gemin2,Gfra1,Gigyf2,Gli1,Gli2,Gli3,Gria2,Grm7,Hex…
Mouse Phenotype	MP:0005452	abnormal adipose tissue amount	85	3.70625e-25	3.5024e-21	4.12047e-23	1.36584	815.615	1114	0.0706405	0.0964836	83	4.79501e-15	4.53129e-11	5.45938e-13	1.37254	268.116	368	701	0.0481171	0.524964	unnamed,unnamed,unnamed,unnamed,unnamed,unnamed,unnamed,unnamed,unnamed,unnamed,unnamed,unnamed,unnamed,unnamed,unnamed,unnamed,unnamed,unnamed,unnamed,unnamed,unnamed,unnamed,unnamed,unnamed,unnamed,unnamed,unnamed,unnamed,unnamed,unnamed,unnamed,unnamed,unnamed,unnamed,unnamed,unnamed,unnamed,unnamed,unnamed,unnamed,unnamed,unnamed,unnamed,unnamed,unnamed,unnamed,unnamed,unnamed,unnamed,unnamed…	2300002M23Rik,Acot13,Acot7,Acta1,Adcy3,Adcyap1,Adgrf5,Adpgk,Adrb1,Adrb2,Adrb3,Afap1l2,Agpat4,Agt,Ahcyl1,Aldob,Alg13,Alpl,Angptl2,Ank2,Ankrd26,Ankrd9,Anks1b,Aplp2,Ar,Arhgap5,Arid5b,Arntl,Arpc2,Arrb1,Atf2,Atl2,Atn1,Atp6v0a1,Atp8b2,Atrn,B4galt1,Bag3,Baz1a,Bdkrb2,Bhlhe40,Bscl2,Bub1b,Bub3,Bzw2,Cacna1s,Camkk2,Car7,Cartpt,Casq2,Cby1,Ccdc3,Ccdc80,Ccl25,Cd84,Cdc73,Cdkal1,Cdkn1c,Cebpb,Cep19,Cers6,Chd2,Chd7…
Mouse Phenotype	MP:0000880	decreased Purkinje cell number	86	3.91234e-25	3.69716e-21	4.29903e-23	2.08761	116.88	244	0.010123	0.0211329	576	9.3292e-06	0.088161	0.000153057	1.64247	29.8332	49	78	0.0064069	0.628205	unnamed,unnamed,unnamed,unnamed,unnamed,unnamed,unnamed,unnamed,unnamed,unnamed,unnamed,unnamed,unnamed,unnamed,unnamed,unnamed,unnamed,unnamed,unnamed,unnamed,unnamed,unnamed,unnamed,unnamed,unnamed,unnamed,unnamed,unnamed,unnamed,unnamed,unnamed,unnamed,unnamed,unnamed,unnamed,unnamed,unnamed,unnamed,unnamed,unnamed,unnamed,unnamed,unnamed,unnamed,unnamed,unnamed,unnamed,unnamed,unnamed,unnamed…	Agtpbp1,Ank3,Arsg,Atf2,Atg7,Atxn1,B4galt2,Cacna1a,Cacna1g,Cacna2d2,Cadps2,Camk4,Cers1,Ebf2,En1,Erbb3,Fbxw7,Gabra1,Gba,Grid2,Herc1,Kcnj6,Kl,Ldb1,Ldlr,Lhx1,Lhx5,Lyst,Mycn,Naglu,Neurod1,Numb,Pdss2,Pi4k2a,Prnp,Psap,Pten,Pura,Rora,Scn8a,Scyl1,Shh,Skor2,Stxbp1,Sumf1,Thrb,Trim2,Tsc1,Zfp423
Mouse Phenotype	MP:0003983	decreased cholesterol level	87	7.55306e-25	7.13764e-21	8.20418e-23	1.56771	368.054	577	0.0318771	0.049974	222	1.46285e-09	1.38239e-05	6.22697e-08	1.4218	126.6	180	331	0.0235356	0.543807	unnamed,unnamed,unnamed,unnamed,unnamed,unnamed,unnamed,unnamed,unnamed,unnamed,unnamed,unnamed,unnamed,unnamed,unnamed,unnamed,unnamed,unnamed,unnamed,unnamed,unnamed,unnamed,unnamed,unnamed,unnamed,unnamed,unnamed,unnamed,unnamed,unnamed,unnamed,unnamed,unnamed,unnamed,unnamed,unnamed,unnamed,unnamed,unnamed,unnamed,unnamed,unnamed,unnamed,unnamed,unnamed,unnamed,unnamed,unnamed,unnamed,unnamed…	4930402H24Rik,Abca1,Abcg5,Abcg8,Acads,Acot13,Adgrf5,Adipor2,Agap2,Ahcyl1,Alb,Angptl3,Apoa1,Apoa2,Apob,Apobec1,Arntl,Atad2b,BC048403,Bag3,Brd7,Ccdc92,Cd44,Cel,Chn1,Col1a1,Crhr2,Ctage5,Ctss,Cx3cl1,Cxcl14,Cyb561,Cygb,Cyp8b1,Dbn1,Dclk1,Dhcr24,Dhx40,Dll1,Dnmt3a,Dusp1,Dync1i2,Eif4e3,Elk4,Elmod1,Elovl6,Enc1,Esco1,Fa2h,Fabp5,Fam234b,Far2,Fasl,Fasn,Fbf1,Fgl1,Fn1,Foxo1,Foxo6,Frrs1l,Fto,G6pc3,Gatm,Gba,Gc,Gh…
Mouse Phenotype	MP:0002401	abnormal lymphopoiesis	88	7.56529e-25	7.1492e-21	8.12409e-23	1.39433	705.718	984	0.0611223	0.0852243	304	5.52657e-08	0.000522261	1.71796e-06	1.26667	246.315	312	644	0.040795	0.484472	unnamed,unnamed,unnamed,unnamed,unnamed,unnamed,unnamed,unnamed,unnamed,unnamed,unnamed,unnamed,unnamed,unnamed,unnamed,unnamed,unnamed,unnamed,unnamed,unnamed,unnamed,unnamed,unnamed,unnamed,unnamed,unnamed,unnamed,unnamed,unnamed,unnamed,unnamed,unnamed,unnamed,unnamed,unnamed,unnamed,unnamed,unnamed,unnamed,unnamed,unnamed,unnamed,unnamed,unnamed,unnamed,unnamed,unnamed,unnamed,unnamed,unnamed…	Abl1,Ada,Adam10,Adgrg3,Aff1,Akap13,Akt3,Apc,Ar,Arhgap17,Arid3a,Arid3b,Arid5b,Arntl,Asxl1,Atmin,Avpr1a,B9d2,Bach2,Bad,Batf,Bcl11a,Bcl11b,Bcl2,Bcl2l1,Bcl2l11,Bhlhe40,Birc3,Blk,C3ar1,Cacnb4,Cadm1,Cbfa2t3,Cblb,Cbx4,Ccnd1,Ccnd3,Cd180,Cd22,Cd24a,Cd28,Cd37,Cd40,Cd40lg,Cd5,Cd74,Cd81,Cd83,Cdh17,Cdkn2a,Chd4,Chek2,Cish,Col10a1,Col1a1,Crebbp,Ctcf,Ctla4,Ctnnbl1,Cux1,Cxcl12,Cxcr4,Cycs,Cyld,Dck,Def6,Dgkz,Dicer1…
Mouse Phenotype	MP:0001570	abnormal circulating enzyme level	89	8.29452e-25	7.83832e-21	8.8071e-23	1.44324	572.322	826	0.0495689	0.0715399	254	7.18833e-09	6.79297e-05	2.6744e-07	1.30965	209.98	275	549	0.0359571	0.500911	unnamed,unnamed,unnamed,unnamed,unnamed,unnamed,unnamed,unnamed,unnamed,unnamed,unnamed,unnamed,unnamed,unnamed,unnamed,unnamed,unnamed,unnamed,unnamed,unnamed,unnamed,unnamed,unnamed,unnamed,unnamed,unnamed,unnamed,unnamed,unnamed,unnamed,unnamed,unnamed,unnamed,unnamed,unnamed,unnamed,unnamed,unnamed,unnamed,unnamed,unnamed,unnamed,unnamed,unnamed,unnamed,unnamed,unnamed,unnamed,unnamed,unnamed…	Abcb11,Abhd5,Acaca,Acox1,Adar,Adora2b,Afap1l2,Agpat3,Agt,Alb,Aldob,Alk,Alpl,Amfr,Ank,Ank1,Ano10,Ap2a2,Apc,Aqp11,Arhgef4,Arntl,Asgr1,Asxl1,Atg7,Atp6v1h,Atp8b1,B4galnt2,Bap1,Bcr,Boc,Btbd9,Cacna1b,Capn3,Casp8,Cav3,Ccdc92,Ccr2,Cd33,Cd84,Cdca8,Cdipt,Celf4,Chd9,Chn1,Cog2,Col18a1,Col1a1,Col4a1,Creb3l1,Ctss,Cyb561,Cyb5d1,Cyp17a1,Cystm1,Daam2,Dag1,Dbn1,Dclk1,Degs1,Dmd,Dpp9,Dusp1,Dynll1,Egr1,Eif4e3,Eif4g2,…
Mouse Phenotype	MP:0001486	abnormal startle reflex	90	1.42703e-24	1.34855e-20	1.49839e-22	1.53215	408.576	626	0.0353868	0.0542179	180	1.23555e-10	1.1676e-06	6.48666e-09	1.50534	100.974	152	264	0.0198745	0.575758	unnamed,unnamed,unnamed,unnamed,unnamed,unnamed,unnamed,unnamed,unnamed,unnamed,unnamed,unnamed,unnamed,unnamed,unnamed,unnamed,unnamed,unnamed,unnamed,unnamed,unnamed,unnamed,unnamed,unnamed,unnamed,unnamed,unnamed,unnamed,unnamed,unnamed,unnamed,unnamed,unnamed,unnamed,unnamed,unnamed,unnamed,unnamed,unnamed,unnamed,unnamed,unnamed,unnamed,unnamed,unnamed,unnamed,unnamed,unnamed,unnamed,unnamed…	Abl2,Adra1d,Adra2a,Adra2c,Aebp2,Afap1l2,Ajap1,Ankrd1,Ankrd11,Atp1a3,Atp2b2,Atp8a2,B3galt2,B4galnt2,B9d1,Barhl1,Bend3,Btg2,Cacna1b,Cacna2d3,Cacng2,Cast,Cck,Cdh23,Ckb,Clic5,Cmah,Colca2,Cox4i1,Cpe,Cplx2,Cpt1c,Csmd1,Ctnna2,Cyfip2,D1Ertd622e,Disc1,Dixdc1,Dlg4,Dock2,Drd1,Dst,Ednra,Efna3,Elmod1,Esrrb,Esrrg,Evl,Fbxo11,Fbxo2,Fbxo41,Fgf9,Fign,Fos,Foxo3,Fyn,Fzd3,Gabra1,Gas6,Gatm,Gipc3,Glra1,Gnao1,Gng7,Gria3…
Mouse Phenotype	MP:0005018	decreased T cell number	91	3.93425e-24	3.71786e-20	4.08556e-22	1.36326	792.219	1080	0.0686142	0.0935389	415	6.71976e-07	0.00635017	1.53016e-05	1.22909	275.001	338	719	0.0441946	0.470097	unnamed,unnamed,unnamed,unnamed,unnamed,unnamed,unnamed,unnamed,unnamed,unnamed,unnamed,unnamed,unnamed,unnamed,unnamed,unnamed,unnamed,unnamed,unnamed,unnamed,unnamed,unnamed,unnamed,unnamed,unnamed,unnamed,unnamed,unnamed,unnamed,unnamed,unnamed,unnamed,unnamed,unnamed,unnamed,unnamed,unnamed,unnamed,unnamed,unnamed,unnamed,unnamed,unnamed,unnamed,unnamed,unnamed,unnamed,unnamed,unnamed,unnamed…	2010300C02Rik,Abca4,Abl1,Acaca,Actl10,Ada,Adam10,Adpgk,Aff1,Akt3,Alg13,Ankrd9,Apc,Arhgef1,Arhgef4,Arhgef6,Arid1b,Arid3b,Arid5b,Armc7,Asxl1,Atf2,Atg7,B9d2,Bach2,Batf,Batf3,Bcl11a,Bcl11b,Bcl2,Bcl2l1,Bcl2l11,Bcl6b,Bclaf1,Bhlhe40,Cacnb4,Cacybp,Cadm1,Casp8,Cblb,Cbx4,Ccdc88b,Ccl25,Ccnd3,Ccr2,Cd180,Cd28,Cd40lg,Cd47,Cd5,Cd74,Cd83,Cd84,Cdkal1,Cdkn2a,Cflar,Chd4,Chd9,Chek2,Chst3,Cnot4,Cog6,Col10a1,Col24a1,C…
Mouse Phenotype	MP:0000226	abnormal mean corpuscular volume	92	4.63022e-24	4.37556e-20	4.75604e-22	1.76629	207.78	367	0.0179958	0.0317859	2016	0.0103531	1	0.04853	1.1943	92.9418	111	243	0.0145136	0.45679	unnamed,unnamed,unnamed,unnamed,unnamed,unnamed,unnamed,unnamed,unnamed,unnamed,unnamed,unnamed,unnamed,unnamed,unnamed,unnamed,unnamed,unnamed,unnamed,unnamed,unnamed,unnamed,unnamed,unnamed,unnamed,unnamed,unnamed,unnamed,unnamed,unnamed,unnamed,unnamed,unnamed,unnamed,unnamed,unnamed,unnamed,unnamed,unnamed,unnamed,unnamed,unnamed,unnamed,unnamed,unnamed,unnamed,unnamed,unnamed,unnamed,unnamed…	1810011O10Rik,Abcb10,Add2,Add3,Adgrf5,Ago2,Ank1,Ap2a2,Appl1,Appl2,Arrb1,Bcl11a,Bend3,Bhlhe40,Bmp7,Btg2,Btrc,Cd300lg,Cd74,Cdk5rap2,Chn1,Clstn1,Col1a1,Cp,Cyb5d1,Dact2,Dbn1,Diaph3,Dkk3,Dmtn,Elmod1,Enc1,Epb41,Esyt3,Exoc6,Fam210a,Fam53b,Fancc,Fbxo7,Fgg,Fkbp10,Foxo3,Gba,Gimap6,Gpi1,Hfe2,Hk1,Hpcal4,Irf8,Itch,Itgb3,Jak1,Kcnb1,Kcne2,Kdm5c,Kit,Kitl,Klf13,Ldha,Lmo2,Lyst,Mamstr,Nprl3,Nptn,Nsun2,Osm,Pa2g4,Pac…
Mouse Phenotype	MP:0003088	abnormal prepulse inhibition	93	4.89279e-24	4.62369e-20	4.97171e-22	1.62146	302.197	490	0.0261733	0.0424389	580	9.76908e-06	0.0923178	0.000159169	1.40259	73.4355	103	192	0.0134676	0.536458	unnamed,unnamed,unnamed,unnamed,unnamed,unnamed,unnamed,unnamed,unnamed,unnamed,unnamed,unnamed,unnamed,unnamed,unnamed,unnamed,unnamed,unnamed,unnamed,unnamed,unnamed,unnamed,unnamed,unnamed,unnamed,unnamed,unnamed,unnamed,unnamed,unnamed,unnamed,unnamed,unnamed,unnamed,unnamed,unnamed,unnamed,unnamed,unnamed,unnamed,unnamed,unnamed,unnamed,unnamed,unnamed,unnamed,unnamed,unnamed,unnamed,unnamed…	Acot7,Acvr1b,Adra1d,Adra2a,Anks1b,Arpc3,Arrb1,Atp1a3,Atp2a2,Atp2b2,Atp6v1c1,Avpr1a,Bend3,C9,Cck,Chst3,Clvs1,Cpe,Ctnna2,Ctnnb1,Ctsk,Cyfip2,Dars,Disc1,Dnajb12,Dtnbp1,Ednra,Efna3,Elmod1,Eno2,Erbb4,Fam20c,Fam53b,Fkbp10,Foxo3,Foxq1,Frmd5,Fzd3,Gabbr1,Gad2,Gipc3,Grid2,Grin1,Grin2b,Grm4,Gsk3b,Herc3,Hmgn3,Irf8,Kalrn,Kcnq2,Klhl29,Lpar1,Lrfn2,Lrrc7,Mag,Map6,Marveld2,Mdk,Mta3,Ncdn,Nedd4l,Nin,Npas3,Nptn,Nrcam…
Mouse Phenotype	MP:0005319	abnormal enzyme/coenzyme level	94	1.75763e-23	1.66096e-19	1.76698e-21	1.4002	649.195	909	0.0562269	0.0787286	332	1.15704e-07	0.0010934	3.29337e-06	1.26349	239.813	303	627	0.0396182	0.483254	unnamed,unnamed,unnamed,unnamed,unnamed,unnamed,unnamed,unnamed,unnamed,unnamed,unnamed,unnamed,unnamed,unnamed,unnamed,unnamed,unnamed,unnamed,unnamed,unnamed,unnamed,unnamed,unnamed,unnamed,unnamed,unnamed,unnamed,unnamed,unnamed,unnamed,unnamed,unnamed,unnamed,unnamed,unnamed,unnamed,unnamed,unnamed,unnamed,unnamed,unnamed,unnamed,unnamed,unnamed,unnamed,unnamed,unnamed,unnamed,unnamed,unnamed…	Abcb11,Abhd5,Acaca,Acox1,Ada,Adar,Adora2b,Afap1l2,Agpat3,Agt,Alb,Aldob,Alk,Alpl,Amfr,Ank,Ank1,Ano10,Ap2a2,Ap3b1,Apc,Aqp11,Arhgef4,Arntl,Asgr1,Asxl1,Atg7,Atp6v1h,Atp8a2,Atp8b1,B4galnt2,Bap1,Bcr,Boc,Btbd9,Cacna1b,Capn3,Casp8,Cav3,Ccdc92,Cck,Ccr2,Cd33,Cd84,Cdca8,Cdipt,Cebpb,Celf4,Chd9,Chn1,Cog2,Col18a1,Col1a1,Col4a1,Creb3l1,Ctss,Cyb561,Cyb5d1,Cyp17a1,Cystm1,Daam2,Dag1,Dbn1,Dclk1,Degs1,Dmd,Dpp9,Dusp1…
Mouse Phenotype	MP:0004090	abnormal sarcomere morphology	95	2.54285e-23	2.40299e-19	2.52946e-21	2.42695	67.1625	163	0.00581695	0.0141174	556	7.5392e-06	0.0712454	0.000128139	1.74303	22.9486	40	60	0.00523013	0.666667	unnamed,unnamed,unnamed,unnamed,unnamed,unnamed,unnamed,unnamed,unnamed,unnamed,unnamed,unnamed,unnamed,unnamed,unnamed,unnamed,unnamed,unnamed,unnamed,unnamed,unnamed,unnamed,unnamed,unnamed,unnamed,unnamed,unnamed,unnamed,unnamed,unnamed,unnamed,unnamed,unnamed,unnamed,unnamed,unnamed,unnamed,unnamed,unnamed,unnamed,unnamed,unnamed,unnamed,unnamed,unnamed,unnamed,unnamed,unnamed,unnamed,unnamed…	A1cf,Acta1,Actc1,Akap13,Ankrd1,Bag3,Bin1,Cacna1s,Cap2,Capn3,Casz1,Col1a1,Cxadr,Daam1,Dicer1,Dmpk,Esrrb,Flnc,Foxp1,Gaa,Hnrnpu,Kalrn,Klhl40,Lmna,Lmod3,Mapt,Med30,Myocd,Neb,Nkx2-5,Rbm20,Rheb,Ryr1,Stac3,Tcap,Tln2,Tmod1,Tnnt2,Vegfa,Xirp1
Mouse Phenotype	MP:0012224	abnormal sterol level	96	2.65197e-23	2.50611e-19	2.61054e-21	1.399	647.606	906	0.0560892	0.0784687	205	6.43169e-10	6.07795e-06	2.96485e-08	1.31596	230.251	303	602	0.0396182	0.503322	unnamed,unnamed,unnamed,unnamed,unnamed,unnamed,unnamed,unnamed,unnamed,unnamed,unnamed,unnamed,unnamed,unnamed,unnamed,unnamed,unnamed,unnamed,unnamed,unnamed,unnamed,unnamed,unnamed,unnamed,unnamed,unnamed,unnamed,unnamed,unnamed,unnamed,unnamed,unnamed,unnamed,unnamed,unnamed,unnamed,unnamed,unnamed,unnamed,unnamed,unnamed,unnamed,unnamed,unnamed,unnamed,unnamed,unnamed,unnamed,unnamed,unnamed…	4930402H24Rik,Abca1,Abcb11,Abcg1,Abcg5,Abcg8,Abhd5,Acads,Acot13,Adar,Adcyap1,Adgrf5,Adipor2,Adora2b,Agap2,Ahcyl1,Alb,Angptl3,Ankrd11,Ap1m2,Ap2a2,Apc,Apoa1,Apoa2,Apob,Apobec1,App,Aqp11,Aqp12,Arntl,Atad2b,Atp6ap2,Atxn2,BC048403,Bag3,Bdnf,Brd7,Bscl2,Btbd9,Cacng3,Ccdc92,Ccl2,Ccr2,Cd44,Cdca8,Cel,Chn1,Cmpk2,Col1a1,Cpe,Crhr2,Csf1,Ctage5,Ctss,Cx3cl1,Cxcl14,Cyb561,Cygb,Cyp17a1,Cyp24a1,Cyp8b1,Dab2,Dbi,Dbn1…
Mouse Phenotype	MP:0002183	gliosis	97	2.86033e-23	2.70301e-19	2.78661e-21	1.73204	217.663	377	0.0188518	0.032652	502	2.8982e-06	0.0273879	5.45576e-05	1.40593	81.085	114	212	0.0149059	0.537736	unnamed,unnamed,unnamed,unnamed,unnamed,unnamed,unnamed,unnamed,unnamed,unnamed,unnamed,unnamed,unnamed,unnamed,unnamed,unnamed,unnamed,unnamed,unnamed,unnamed,unnamed,unnamed,unnamed,unnamed,unnamed,unnamed,unnamed,unnamed,unnamed,unnamed,unnamed,unnamed,unnamed,unnamed,unnamed,unnamed,unnamed,unnamed,unnamed,unnamed,unnamed,unnamed,unnamed,unnamed,unnamed,unnamed,unnamed,unnamed,unnamed,unnamed…	Abcd2,Abr,Acot7,Aff1,Afg3l1,Aga,App,Arsa,Arsg,Atg7,Atmin,Atp1a3,Atrn,Avil,Bad,Bcl2l11,Bcr,Bid,Cast,Ccm2,Cd40lg,Cers1,Cers6,Clcn3,Cln8,Cnp,Cntn1,Cntnap2,Col4a1,Cox10,Cryba1,Csf1r,Ctsb,Cx3cr1,Dag1,Dnaic1,Drd1,Dst,Dync1h1,Eef1a2,Emx1,En1,Epg5,Esr2,Fig4,Fshr,Galc,Gba,Gjb1,Gjc2,Gnaq,Gpm6b,Grn,Hexb,Inpp4a,Jam3,Kcnj10,Kcnq3,Lbr,Lgi1,Lrp1,Lrpap1,Lrrk2,Mapk1,Mapt,Mgat5b,Mlc1,Mog,Mt1,Nat8l,Ndufs4,Nf1,Npas4…
Mouse Phenotype	MP:0006387	abnormal T cell number	98	3.10562e-23	2.93481e-19	2.99471e-21	1.3121	995.352	1306	0.0862075	0.113113	310	6.04015e-08	0.000570795	1.84127e-06	1.21881	356.086	434	931	0.0567469	0.466165	unnamed,unnamed,unnamed,unnamed,unnamed,unnamed,unnamed,unnamed,unnamed,unnamed,unnamed,unnamed,unnamed,unnamed,unnamed,unnamed,unnamed,unnamed,unnamed,unnamed,unnamed,unnamed,unnamed,unnamed,unnamed,unnamed,unnamed,unnamed,unnamed,unnamed,unnamed,unnamed,unnamed,unnamed,unnamed,unnamed,unnamed,unnamed,unnamed,unnamed,unnamed,unnamed,unnamed,unnamed,unnamed,unnamed,unnamed,unnamed,unnamed,unnamed…	2010300C02Rik,Abca4,Abcg1,Abl1,Acaca,Actl10,Ada,Adam10,Adcyap1,Adgrb1,Adpgk,Aff1,Akt3,Alg13,Ankrd9,Anxa5,Anxa6,Apc,Arap2,Arhgef1,Arhgef4,Arhgef6,Arid1b,Arid3b,Arid5b,Armc7,Arntl,Asxl1,Atf2,Atg7,B9d2,Bach2,Bap1,Batf,Batf3,Bcl11a,Bcl11b,Bcl2,Bcl2l1,Bcl2l11,Bcl6b,Bclaf1,Bhlhe40,Birc3,Cacnb4,Cacybp,Cadm1,Casp8,Cblb,Cbx4,Ccdc88b,Ccl2,Ccl25,Ccnd3,Ccr2,Cd180,Cd28,Cd40lg,Cd47,Cd5,Cd74,Cd83,Cd84,Cdkal1,Cd…
Mouse Phenotype	MP:0013560	abnormal endocrine gland morphology	99	3.35044e-23	3.16617e-19	3.19815e-21	1.2834	1174.23	1507	0.1017	0.130521	63	2.37518e-16	2.24454e-12	3.56276e-14	1.3273	374.445	497	979	0.0649843	0.507661	unnamed,unnamed,unnamed,unnamed,unnamed,unnamed,unnamed,unnamed,unnamed,unnamed,unnamed,unnamed,unnamed,unnamed,unnamed,unnamed,unnamed,unnamed,unnamed,unnamed,unnamed,unnamed,unnamed,unnamed,unnamed,unnamed,unnamed,unnamed,unnamed,unnamed,unnamed,unnamed,unnamed,unnamed,unnamed,unnamed,unnamed,unnamed,unnamed,unnamed,unnamed,unnamed,unnamed,unnamed,unnamed,unnamed,unnamed,unnamed,unnamed,unnamed…	Abca1,Abcb9,Abcc10,Abcc4,Abcc8,Abcd2,Abl1,Actn4,Acvr1b,Ada,Adam10,Adam19,Adamts3,Adipor2,Aff1,Ago2,Akap5,Akt3,Aldh1b1,Alpl,Ank1,Anxa1,Anxa7,Ap2b1,Apc,Apoa1,Ar,Arfgef3,Arhgap5,Arid5b,Arnt2,Arntl,Ascl1,Asxl1,Atg16l1,Atmin,Atxn2,Avpr1a,B4galt1,Bad,Bag3,Bcl11a,Bcl11b,Bcl2,Bcl2l1,Bcl2l11,Bhlhe40,Bid,Bmp10,Bmp4,Cacna1a,Cacna1d,Cacna1e,Cacna2d2,Cacnb4,Cacybp,Cadm1,Cadps,Cadps2,Casp8,Cbx4,Ccdc80,Cckbr,Cc…
Mouse Phenotype	MP:0002106	abnormal muscle physiology	100	5.01574e-23	4.73988e-19	4.73988e-21	1.26592	1299.45	1645	0.112545	0.142474	29	2.35215e-21	2.22278e-17	7.66476e-19	1.38116	372.15	514	973	0.0672071	0.528263	unnamed,unnamed,unnamed,unnamed,unnamed,unnamed,unnamed,unnamed,unnamed,unnamed,unnamed,unnamed,unnamed,unnamed,unnamed,unnamed,unnamed,unnamed,unnamed,unnamed,unnamed,unnamed,unnamed,unnamed,unnamed,unnamed,unnamed,unnamed,unnamed,unnamed,unnamed,unnamed,unnamed,unnamed,unnamed,unnamed,unnamed,unnamed,unnamed,unnamed,unnamed,unnamed,unnamed,unnamed,unnamed,unnamed,unnamed,unnamed,unnamed,unnamed…	A1cf,Abca1,Abcg5,Abhd5,Abl1,Acadm,Acta1,Actc1,Actg1,Acvrl1,Ada,Adra1a,Adra1d,Adrb1,Adrb2,Agrn,Agxt2,Ak1,Akap13,Akap6,Alb,Ank1,Ank2,Ankrd1,Anxa6,Apob,Apobec2,App,Appl1,Appl2,Ar,Arfgef3,Arhgap26,Arhgef1,Arhgef12,Arid2,Arntl,Arrb1,Arsb,Asic2,Asph,Atp1a1,Atp1a3,Atp1b1,Atp2a2,Atp2a3,Atp2b1,Atp6ap2,Atrn,Atrnl1,Avpr1a,Bach1,Bag3,Bcl2,Bcl9l,Bex1,Bid,Bin1,Birc3,Bmp10,Bnip3,Bsn,Bves,C1qtnf9,Cacna1a,Cacna1h…
Mouse Phenotype	MP:0009936	abnormal dendritic spine morphology	101	5.02352e-23	4.74722e-19	4.70022e-21	2.0329	116.582	237	0.0100972	0.0205266	252	6.80993e-09	6.43538e-05	2.55372e-07	1.91213	25.6259	49	67	0.0064069	0.731343	unnamed,unnamed,unnamed,unnamed,unnamed,unnamed,unnamed,unnamed,unnamed,unnamed,unnamed,unnamed,unnamed,unnamed,unnamed,unnamed,unnamed,unnamed,unnamed,unnamed,unnamed,unnamed,unnamed,unnamed,unnamed,unnamed,unnamed,unnamed,unnamed,unnamed,unnamed,unnamed,unnamed,unnamed,unnamed,unnamed,unnamed,unnamed,unnamed,unnamed,unnamed,unnamed,unnamed,unnamed,unnamed,unnamed,unnamed,unnamed,unnamed,unnamed…	Arhgef15,Arhgef6,Arpc3,Atg7,Bdnf,Ckap5,Clstn1,Cpeb3,Cpeb4,Cpt1c,Cyfip2,Dact1,Dbn1,Dlg4,Elfn1,Emx1,Foxo6,Grin2b,Grn,Kidins220,Lrfn2,Lrp1,Lrrc7,Lrrtm1,Lzts1,Nptn,Nrp2,Pcdh9,Pde4b,Prss12,Pten,Rbfox1,Rbfox3,Rnf112,Rock2,Rps6ka5,Scn1a,Shank2,Shank3,Slc12a5,Slc17a6,Spire1,Srcin1,Srgap3,Syngap1,Tanc1,Tmem108,Tsc2,Zdhhc8
Mouse Phenotype	MP:0013229	abnormal brain ventricle size	102	5.86503e-23	5.54245e-19	5.43377e-21	1.65346	263.084	435	0.0227858	0.0376754	543	5.63294e-06	0.0532313	9.80318e-05	1.43426	66.9334	96	175	0.0125523	0.548571	unnamed,unnamed,unnamed,unnamed,unnamed,unnamed,unnamed,unnamed,unnamed,unnamed,unnamed,unnamed,unnamed,unnamed,unnamed,unnamed,unnamed,unnamed,unnamed,unnamed,unnamed,unnamed,unnamed,unnamed,unnamed,unnamed,unnamed,unnamed,unnamed,unnamed,unnamed,unnamed,unnamed,unnamed,unnamed,unnamed,unnamed,unnamed,unnamed,unnamed,unnamed,unnamed,unnamed,unnamed,unnamed,unnamed,unnamed,unnamed,unnamed,unnamed…	Aga,Ank2,Arnt2,Atf2,Atxn1,B4galt2,Basp1,Brsk2,Cables1,Cdc42,Cdk5rap2,Cdon,Chl1,Chn1,Clcn3,Cntn2,Col18a1,Col4a1,Csf1r,D430042O09Rik,Dclk1,Dnah5,Drd1,Eml1,Emx1,Enah,Evl,Fgfr2,Fig4,Fzd3,Gja1,Gldc,Gpm6b,Hsf2,Id2,Id3,Id4,Jhy,Kidins220,Kif20b,Kif2a,Lbr,Luzp1,Macf1,Map1b,Mapk8ip3,Mkks,Mycbp2,Myh10,Nfib,Nfix,Npas3,Nr2e1,Numb,Numbl,Pdcd6ip,Pde11a,Phgdh,Plp1,Pou3f3,Prickle1,Prnp,Pros1,Psen1,Ptbp2,Rb1,Rgs4,…
Mouse Phenotype	MP:0005277	abnormal brainstem morphology	103	2.54102e-22	2.40126e-18	2.33132e-20	1.51263	395.337	598	0.0342402	0.0517928	99	5.05701e-14	4.77888e-10	4.82715e-12	1.62058	92.5593	150	242	0.019613	0.619835	unnamed,unnamed,unnamed,unnamed,unnamed,unnamed,unnamed,unnamed,unnamed,unnamed,unnamed,unnamed,unnamed,unnamed,unnamed,unnamed,unnamed,unnamed,unnamed,unnamed,unnamed,unnamed,unnamed,unnamed,unnamed,unnamed,unnamed,unnamed,unnamed,unnamed,unnamed,unnamed,unnamed,unnamed,unnamed,unnamed,unnamed,unnamed,unnamed,unnamed,unnamed,unnamed,unnamed,unnamed,unnamed,unnamed,unnamed,unnamed,unnamed,unnamed…	Agtpbp1,Ap3b1,Apaf1,Apc,Ascl1,Asic2,Atg7,Atp2b2,Atrn,Bcl2,Bcl2l1,Bdnf,Bhlhe22,Cacna1a,Cacna1d,Cacna2d2,Cdc42,Cdkn1c,Chrnb2,Cit,Clcn2,Cntfr,Ctnnb1,Cycs,Cyp26a1,Cyp26c1,D430042O09Rik,Dbx1,Dcc,Dclk1,Dkk1,Dlg5,Dst,Dyrk1a,Egr2,Emx2,En1,En2,Eno2,Erbb3,Erf,Esr2,Ext1,Fbxw7,Fgf8,Fgfr1,Fkrp,Foxc1,Fuz,Galc,Gata3,Gbx2,Gdf7,Gdnf,Gli3,Gpr37,Grid2,Grin1,Hes1,Hes3,Hhat,Hoxa1,Hoxb1,Hoxb2,Hsd11b1,Igf1r,Il17rd,Kat6…
Mouse Phenotype	MP:0005164	abnormal response to injury	104	4.21947e-22	3.9874e-18	3.83404e-20	1.39035	637.971	887	0.0552547	0.0768231	127	8.22577e-13	7.77336e-09	6.12075e-11	1.38197	214.187	296	560	0.0387029	0.528571	unnamed,unnamed,unnamed,unnamed,unnamed,unnamed,unnamed,unnamed,unnamed,unnamed,unnamed,unnamed,unnamed,unnamed,unnamed,unnamed,unnamed,unnamed,unnamed,unnamed,unnamed,unnamed,unnamed,unnamed,unnamed,unnamed,unnamed,unnamed,unnamed,unnamed,unnamed,unnamed,unnamed,unnamed,unnamed,unnamed,unnamed,unnamed,unnamed,unnamed,unnamed,unnamed,unnamed,unnamed,unnamed,unnamed,unnamed,unnamed,unnamed,unnamed…	A1cf,Abcb10,Abhd2,Abra,Acvrl1,Adam9,Adamts7,Adora1,Adora2b,Adra1a,Ak1,Akap13,Ankrd1,Anxa1,Apoa1,Aqp4,Arntl,Arpc3,Asph,Atp1b1,Atp2a2,B4galt1,Bach1,Bid,Bnc1,Bnip3,Bub1b,Bves,C6,Cacna1a,Camk2a,Camk2d,Camk2g,Capn9,Casp8,Casq2,Cavin4,Ccl2,Ccm2l,Ccr2,Cd40,Cd40lg,Cd44,Cd6,Cd82,Cdc42,Cdkn2a,Ceacam1,Chrnb2,Chst14,Clec11a,Clic4,Cmah,Cnr1,Col13a1,Col1a1,Col9a1,Comp,Cp,Csrp1,Csrp2,Csrp3,Ctnnb1,Cx3cl1,Cx3cr1,…
Mouse Phenotype	MP:0000849	abnormal cerebellum morphology	105	5.17556e-22	4.89091e-18	4.65801e-20	1.37038	697.617	956	0.0604207	0.0827992	59	1.35326e-16	1.27883e-12	2.16751e-14	1.49568	172.497	258	451	0.0337343	0.572062	unnamed,unnamed,unnamed,unnamed,unnamed,unnamed,unnamed,unnamed,unnamed,unnamed,unnamed,unnamed,unnamed,unnamed,unnamed,unnamed,unnamed,unnamed,unnamed,unnamed,unnamed,unnamed,unnamed,unnamed,unnamed,unnamed,unnamed,unnamed,unnamed,unnamed,unnamed,unnamed,unnamed,unnamed,unnamed,unnamed,unnamed,unnamed,unnamed,unnamed,unnamed,unnamed,unnamed,unnamed,unnamed,unnamed,unnamed,unnamed,unnamed,unnamed…	Abcd2,Abl1,Abl2,Abr,Adgrg1,Aff1,Aga,Agtpbp1,Akt3,Ank1,Ank3,Apc2,App,Arsa,Arsg,Ass1,Astn1,Atf2,Atg7,Atp2b2,Atrn,Atxn1,Atxn2,B4galnt1,B4galt2,Bcr,Bdnf,Bid,Cacna1a,Cacna1g,Cacna2d2,Cadps,Cadps2,Calb1,Camk4,Camta1,Cbln1,Ccm2,Ccnd1,Cdk5r1,Cdk5r2,Cend1,Cep120,Cers1,Cit,Clcn2,Cnp,Cntn1,Cp,Crybb2,Ctnna2,Ctnnb1,Ctsb,Cxcl12,Cxcr4,Dab1,Dab2ip,Dag1,Dclk1,Disc1,Dnah5,Dnajc3,Dnm1,Dock3,Dpysl5,E2f6,Ebf2,Eef1a2,…
Mouse Phenotype	MP:0001993	abnormal blinking	106	5.24888e-22	4.96019e-18	4.67942e-20	4.46917	14.3203	64	0.00124029	0.00554304	1766	0.00636428	1	0.0340557	2.28772	3.05981	7	8	0.000915272	0.875	unnamed,unnamed,unnamed,unnamed,unnamed,unnamed,unnamed,unnamed,unnamed,unnamed,unnamed,unnamed,unnamed,unnamed,unnamed,unnamed,unnamed,unnamed,unnamed,unnamed,unnamed,unnamed,unnamed,unnamed,unnamed,unnamed,unnamed,unnamed,unnamed,unnamed,unnamed,unnamed,unnamed,unnamed,unnamed,unnamed,unnamed,unnamed,unnamed,unnamed,unnamed,unnamed,unnamed,unnamed,unnamed,unnamed,unnamed,unnamed,unnamed,unnamed…	Atp2b2,Hdac4,Hoxb1,Kcna1,Kcnma1,Pparg,Tnfrsf14
Mouse Phenotype	MP:0008428	abnormal spatial working memory	107	6.45177e-22	6.09693e-18	5.69806e-20	1.85483	154.731	287	0.0134013	0.0248571	512	3.24721e-06	0.0306861	5.99338e-05	1.67599	29.8332	50	78	0.00653766	0.641026	unnamed,unnamed,unnamed,unnamed,unnamed,unnamed,unnamed,unnamed,unnamed,unnamed,unnamed,unnamed,unnamed,unnamed,unnamed,unnamed,unnamed,unnamed,unnamed,unnamed,unnamed,unnamed,unnamed,unnamed,unnamed,unnamed,unnamed,unnamed,unnamed,unnamed,unnamed,unnamed,unnamed,unnamed,unnamed,unnamed,unnamed,unnamed,unnamed,unnamed,unnamed,unnamed,unnamed,unnamed,unnamed,unnamed,unnamed,unnamed,unnamed,unnamed…	Adra1d,Adra2c,App,Arpc3,Atxn1,Brinp1,Cers1,Chl1,Dcdc2a,Disc1,Dlg4,Emx1,Eno2,Fgf13,Gria1,Gria2,Grin1,Grin2a,Grin2b,Grm7,Itga3,Itm2b,Kalrn,Kcnh3,Ldlr,Lrrtm1,Lzts1,Mapt,Nr3c2,Ntrk2,Pde4b,Ppp3r1,Psen1,Ptprz1,Rai1,Shank1,Slc6a1,Sorcs3,Spred1,Srgap3,Stx1a,Syngap1,Tanc1,Tbx1,Tlr3,Tmem108,Tuba1a,Wwc1,Ywhaz,Zic2
Mouse Phenotype	MP:0000847	abnormal metencephalon morphology	108	6.55041e-22	6.19014e-18	5.73161e-20	1.35278	756.959	1024	0.0655603	0.0886887	34	1.77551e-20	1.67786e-16	4.93488e-18	1.53544	186.266	286	487	0.0373954	0.587269	unnamed,unnamed,unnamed,unnamed,unnamed,unnamed,unnamed,unnamed,unnamed,unnamed,unnamed,unnamed,unnamed,unnamed,unnamed,unnamed,unnamed,unnamed,unnamed,unnamed,unnamed,unnamed,unnamed,unnamed,unnamed,unnamed,unnamed,unnamed,unnamed,unnamed,unnamed,unnamed,unnamed,unnamed,unnamed,unnamed,unnamed,unnamed,unnamed,unnamed,unnamed,unnamed,unnamed,unnamed,unnamed,unnamed,unnamed,unnamed,unnamed,unnamed…	Abcd2,Abl1,Abl2,Abr,Adgrg1,Aff1,Aga,Agtpbp1,Akt3,Ank1,Ank3,Apc2,App,Arsa,Arsg,Ascl1,Ass1,Astn1,Atf2,Atg7,Atp2b2,Atrn,Atxn1,Atxn2,B4galnt1,B4galt2,Bcl2,Bcl2l1,Bcr,Bdnf,Bid,Cacna1a,Cacna1d,Cacna1g,Cacna2d2,Cadps,Cadps2,Calb1,Camk4,Camta1,Cbln1,Ccm2,Ccnd1,Cdk5r1,Cdk5r2,Cend1,Cep120,Cers1,Cit,Clcn2,Cnp,Cntfr,Cntn1,Cp,Crybb2,Ctnna2,Ctnnb1,Ctsb,Cxcl12,Cxcr4,Dab1,Dab2ip,Dag1,Dcc,Dclk1,Disc1,Dnah5,Dnajc3…
Mouse Phenotype	MP:0009357	abnormal seizure response to inducing agent	109	9.28846e-22	8.77759e-18	8.05284e-20	1.54117	349.085	538	0.0302343	0.0465962	62	2.04746e-16	1.93485e-12	3.12073e-14	1.75643	74.5829	131	195	0.0171287	0.671795	unnamed,unnamed,unnamed,unnamed,unnamed,unnamed,unnamed,unnamed,unnamed,unnamed,unnamed,unnamed,unnamed,unnamed,unnamed,unnamed,unnamed,unnamed,unnamed,unnamed,unnamed,unnamed,unnamed,unnamed,unnamed,unnamed,unnamed,unnamed,unnamed,unnamed,unnamed,unnamed,unnamed,unnamed,unnamed,unnamed,unnamed,unnamed,unnamed,unnamed,unnamed,unnamed,unnamed,unnamed,unnamed,unnamed,unnamed,unnamed,unnamed,unnamed…	Adk,Adora1,Akap5,Akt3,Amph,Ap3m2,Arhgap32,Atp1a3,B4galnt1,Bdnf,Bhlhe40,Bsn,Cacna1a,Cacna1g,Cacna2d2,Car7,Cdk5r1,Celf4,Chrna4,Chrnb2,Cit,Ckb,Clcn3,Cnr1,Cntn2,Cntn5,Cntnap2,Ctnnb1,Dnm1,Elfn1,Eml1,Emx1,Faim2,Fgf13,Fosb,Fyn,Fzd9,Gabbr1,Gabra1,Gabrd,Gabrg2,Gad2,Gal,Gfra2,Glra1,Gnao1,Gng3,Gng7,Gria3,Grik4,Grik5,Grin1,Grin2a,Grm5,Grm7,Hdac4,Hexb,Hlf,Hrh2,Htr4,Htr7,Impa1,Kcna1,Kcna2,Kcnc2,Kcnh3,Kcnj6,Kcn…
Mouse Phenotype	MP:0005375	adipose tissue phenotype	110	1.13205e-21	1.06979e-17	9.72534e-20	1.27872	1130.81	1446	0.0979399	0.125238	74	1.90296e-15	1.7983e-11	2.43014e-13	1.32094	365.647	483	956	0.0631538	0.50523	unnamed,unnamed,unnamed,unnamed,unnamed,unnamed,unnamed,unnamed,unnamed,unnamed,unnamed,unnamed,unnamed,unnamed,unnamed,unnamed,unnamed,unnamed,unnamed,unnamed,unnamed,unnamed,unnamed,unnamed,unnamed,unnamed,unnamed,unnamed,unnamed,unnamed,unnamed,unnamed,unnamed,unnamed,unnamed,unnamed,unnamed,unnamed,unnamed,unnamed,unnamed,unnamed,unnamed,unnamed,unnamed,unnamed,unnamed,unnamed,unnamed,unnamed…	2300002M23Rik,Abcg1,Acot13,Acot7,Acta1,Adcy3,Adcyap1,Adgrf5,Adipor2,Adpgk,Adrb1,Adrb2,Adrb3,Afap1l2,Afg3l1,Agpat4,Agr2,Agt,Ahcyl1,Aldob,Alg13,Alpl,Angptl2,Angptl3,Ank2,Ankrd26,Ankrd9,Anks1b,Anxa1,Aplp2,Appl1,Ar,Arhgap5,Arhgef11,Arid5b,Arl6,Arntl,Arpc2,Arrb1,Arrdc3,Arsb,Atf2,Atl2,Atn1,Atp6v0a1,Atp8b2,Atrn,Atxn2,B4galt1,Bag3,Baz1a,Bcl2,Bdkrb2,Bhlhe40,Bmp1,Bscl2,Bsx,Bub1b,Bub3,Bzw2,C1qtnf9,C3ar1,Cac…
Mouse Phenotype	MP:0000745	tremors	111	1.33179e-21	1.25854e-17	1.13383e-19	1.48126	428.014	634	0.0370704	0.0549108	124	5.41018e-13	5.11262e-09	4.12308e-11	1.51892	120.48	183	315	0.0239278	0.580952	unnamed,unnamed,unnamed,unnamed,unnamed,unnamed,unnamed,unnamed,unnamed,unnamed,unnamed,unnamed,unnamed,unnamed,unnamed,unnamed,unnamed,unnamed,unnamed,unnamed,unnamed,unnamed,unnamed,unnamed,unnamed,unnamed,unnamed,unnamed,unnamed,unnamed,unnamed,unnamed,unnamed,unnamed,unnamed,unnamed,unnamed,unnamed,unnamed,unnamed,unnamed,unnamed,unnamed,unnamed,unnamed,unnamed,unnamed,unnamed,unnamed,unnamed…	2700060E02Rik,Abcd2,Agrn,Agtpbp1,Ank1,Ank3,Ankfn1,Arsa,Ass1,Atf2,Atg7,Atp2b2,Atp8a2,Atrn,Avil,Bag3,Bmp7,Brd7,Cacna1a,Cacna1g,Cacna2d2,Camk4,Cdh23,Cers1,Cit,Clcn3,Cldn11,Clstn3,Cnp,Col13a1,Col1a1,Colq,Cpe,Csf1,Ctnnb1,Ctsb,Cyb561,Cys1,Dab1,Ddc,Degs1,Dmd,Dnm1,Dst,Ect2,Eef1a2,Egr2,Egr3,Elmod1,En1,Entpd1,Ercc3,Fbxo41,Fdft1,Fgfr2,Fig4,Gabra1,Gabrg2,Gal3st1,Galc,Gars,Gjb1,Gjc2,Gli2,Glra1,Gnao1,Golga1,Gp…
Mouse Phenotype	MP:0013561	abnormal endocrine gland physiology	112	1.37367e-21	1.29811e-17	1.15903e-19	1.42998	523.784	749	0.045365	0.0648709	369	2.95571e-07	0.00279315	7.56951e-06	1.32382	151.078	200	395	0.0261506	0.506329	unnamed,unnamed,unnamed,unnamed,unnamed,unnamed,unnamed,unnamed,unnamed,unnamed,unnamed,unnamed,unnamed,unnamed,unnamed,unnamed,unnamed,unnamed,unnamed,unnamed,unnamed,unnamed,unnamed,unnamed,unnamed,unnamed,unnamed,unnamed,unnamed,unnamed,unnamed,unnamed,unnamed,unnamed,unnamed,unnamed,unnamed,unnamed,unnamed,unnamed,unnamed,unnamed,unnamed,unnamed,unnamed,unnamed,unnamed,unnamed,unnamed,unnamed…	Abcc8,Adrb2,Ago2,Akap5,Alb,Aldh1b1,Ank2,Anxa1,Anxa7,Arfgef3,Arnt2,Arntl,Atxn2,Bad,Bcl11b,Bcl2,Bcl2l11,Birc6,C1qtnf9,Cacna1d,Cacna1e,Cacna2d2,Cacnb4,Cadm1,Cadps,Cadps2,Cartpt,Casp7,Casp8,Cbx4,Ccdc80,Cd28,Cdkal1,Cebpb,Cflar,Cftr,Chga,Chgb,Chrm3,Clec16a,Col1a1,Coro1a,Cyp11a1,Ddo,Dgkz,Dicer1,Dpp4,Dtx1,E2f1,Efnb2,Egln3,Egr1,Esr1,Esr2,Extl3,Fasn,Fem1b,Ffar2,Ffar3,Foxa2,Foxo1,Foxo3,Fyn,Gadd45gip1,Gal,Ga…
Mouse Phenotype	MP:0003091	abnormal cell migration	113	1.49777e-21	1.41539e-17	1.25256e-19	1.348	762.614	1028	0.0660501	0.0890352	16	1.3591e-23	1.28435e-19	8.02716e-21	1.55486	201.948	314	528	0.0410565	0.594697	unnamed,unnamed,unnamed,unnamed,unnamed,unnamed,unnamed,unnamed,unnamed,unnamed,unnamed,unnamed,unnamed,unnamed,unnamed,unnamed,unnamed,unnamed,unnamed,unnamed,unnamed,unnamed,unnamed,unnamed,unnamed,unnamed,unnamed,unnamed,unnamed,unnamed,unnamed,unnamed,unnamed,unnamed,unnamed,unnamed,unnamed,unnamed,unnamed,unnamed,unnamed,unnamed,unnamed,unnamed,unnamed,unnamed,unnamed,unnamed,unnamed,unnamed…	Abhd2,Actn4,Acvr1,Adam9,Adamts20,Adamts7,Adgrg1,Adora2b,Ajuba,Angptl2,Anxa1,Apaf1,Apc2,Appl1,Appl2,Arfgef2,Arhgap25,Arhgef28,Arhgef4,Arid1a,Arid5b,Arntl,Arpc3,Ascl1,Ass1,Astn1,Atp2a2,B4galt1,Cadps2,Ccl17,Ccl2,Ccr2,Ccr3,Cd22,Cd40lg,Cd44,Cd47,Cd82,Cdh2,Cdh5,Cdkn2a,Celsr3,Cend1,Chd7,Chst1,Chst2,Clasp2,Clic4,Cmklr1,Cntnap2,Coro1a,Crmp1,Csf1,Csf2,Csf3r,Ctnnb1,Ctss,Cttn,Cux2,Cx3cl1,Cx3cr1,Cxcl12,Cxcr4,…
Mouse Phenotype	MP:0000913	abnormal brain development	114	1.60685e-21	1.51847e-17	1.332e-19	1.27407	1156.14	1473	0.100133	0.127577	11	2.4681e-27	2.33236e-23	2.12033e-24	1.48375	305.981	454	800	0.0593619	0.5675	unnamed,unnamed,unnamed,unnamed,unnamed,unnamed,unnamed,unnamed,unnamed,unnamed,unnamed,unnamed,unnamed,unnamed,unnamed,unnamed,unnamed,unnamed,unnamed,unnamed,unnamed,unnamed,unnamed,unnamed,unnamed,unnamed,unnamed,unnamed,unnamed,unnamed,unnamed,unnamed,unnamed,unnamed,unnamed,unnamed,unnamed,unnamed,unnamed,unnamed,unnamed,unnamed,unnamed,unnamed,unnamed,unnamed,unnamed,unnamed,unnamed,unnamed…	Abl1,Abl2,Abr,Acvr1b,Adam10,Adgrg1,Ago2,Alx1,Apaf1,Apbb1,Apbb2,Apc,Apob,Ar,Arfgef2,Arl5c,Arl6,Ascl1,Ass1,Astn1,Atmin,Atp2c1,Axin2,B4galt2,B9d1,Bcl2l1,Bcor,Bcr,Bdnf,Bmp4,Bmp7,Bmper,Boc,Brsk2,Btaf1,Cacna1a,Cacna2d2,Cacnb2,Cadps2,Casp7,Ccnd1,Cdc42,Cdh2,Cdk5r1,Cdk5r2,Cdk5rap2,Cdkn2a,Cdon,Celsr3,Cend1,Cep120,Cer1,Cers1,Cfap54,Chd7,Chn2,Cnn3,Cntn2,Cobl,Col10a1,Col18a1,Col1a1,Coro1c,Cox4i1,Crb2,Crebbp,C…
Mouse Phenotype	MP:0000003	abnormal adipose tissue morphology	115	2.06603e-21	1.9524e-17	1.69774e-19	1.27976	1110.37	1421	0.096169	0.123073	72	1.77784e-15	1.68006e-11	2.33342e-13	1.32549	356.851	473	933	0.0618462	0.506967	unnamed,unnamed,unnamed,unnamed,unnamed,unnamed,unnamed,unnamed,unnamed,unnamed,unnamed,unnamed,unnamed,unnamed,unnamed,unnamed,unnamed,unnamed,unnamed,unnamed,unnamed,unnamed,unnamed,unnamed,unnamed,unnamed,unnamed,unnamed,unnamed,unnamed,unnamed,unnamed,unnamed,unnamed,unnamed,unnamed,unnamed,unnamed,unnamed,unnamed,unnamed,unnamed,unnamed,unnamed,unnamed,unnamed,unnamed,unnamed,unnamed,unnamed…	2300002M23Rik,Abcg1,Acot13,Acot7,Acta1,Adcy3,Adcyap1,Adgrf5,Adipor2,Adpgk,Adrb1,Adrb2,Adrb3,Afap1l2,Afg3l1,Agpat4,Agr2,Agt,Ahcyl1,Aldob,Alg13,Alpl,Angptl2,Angptl3,Ank2,Ankrd26,Ankrd9,Anks1b,Anxa1,Aplp2,Ar,Arhgap5,Arhgef11,Arid5b,Arl6,Arntl,Arpc2,Arrb1,Arrdc3,Arsb,Atf2,Atl2,Atn1,Atp6v0a1,Atp8b2,Atrn,Atxn2,B4galt1,Bag3,Baz1a,Bcl2,Bdkrb2,Bhlhe40,Bmp1,Bscl2,Bsx,Bub1b,Bub3,Bzw2,C1qtnf9,C3ar1,Cacna1s,C…
Mouse Phenotype	MP:0008872	abnormal physiological response to xenobiotic	116	2.44058e-21	2.30634e-17	1.98823e-19	1.34154	780.445	1047	0.0675944	0.0906808	183	1.4363e-10	1.3573e-06	7.41694e-09	1.32191	239.048	316	625	0.041318	0.5056	unnamed,unnamed,unnamed,unnamed,unnamed,unnamed,unnamed,unnamed,unnamed,unnamed,unnamed,unnamed,unnamed,unnamed,unnamed,unnamed,unnamed,unnamed,unnamed,unnamed,unnamed,unnamed,unnamed,unnamed,unnamed,unnamed,unnamed,unnamed,unnamed,unnamed,unnamed,unnamed,unnamed,unnamed,unnamed,unnamed,unnamed,unnamed,unnamed,unnamed,unnamed,unnamed,unnamed,unnamed,unnamed,unnamed,unnamed,unnamed,unnamed,unnamed…	Abcc10,Abl1,Acvrl1,Adcyap1,Adora2b,Adrb1,Adrb2,Adrb3,Agtr1b,Akt3,Amfr,Ank2,Anxa1,Apc,Aqp4,Ar,Arhgef1,Arhgef4,Atf6,Atp1b1,Bap1,Bcl2l11,Bdkrb2,Bin1,Bub3,Cacna1a,Cacna1e,Cacna1g,Cast,Cckbr,Ccl2,Ccr2,Cd34,Cdk5r1,Cdkn2a,Cdkn2b,Ceacam1,Cebpb,Ces1c,Cftr,Chek2,Chordc1,Chrm1,Chrm2,Chrm3,Chrna2,Cnr1,Col1a1,Cox15,Cradd,Csf1,Cul9,Cx3cl1,Cx3cr1,Cygb,Cyld,Cyp3a13,Dab2ip,Dclre1a,Dmd,Dnah11,Dnajc27,Dock2,Drd1,Du…
Mouse Phenotype	MP:0000771	abnormal brain size	117	3.88352e-21	3.66993e-17	3.13669e-19	1.45116	469.968	682	0.040704	0.0590681	230	3.16292e-09	2.98896e-05	1.29955e-07	1.40038	134.249	188	351	0.0245816	0.535613	unnamed,unnamed,unnamed,unnamed,unnamed,unnamed,unnamed,unnamed,unnamed,unnamed,unnamed,unnamed,unnamed,unnamed,unnamed,unnamed,unnamed,unnamed,unnamed,unnamed,unnamed,unnamed,unnamed,unnamed,unnamed,unnamed,unnamed,unnamed,unnamed,unnamed,unnamed,unnamed,unnamed,unnamed,unnamed,unnamed,unnamed,unnamed,unnamed,unnamed,unnamed,unnamed,unnamed,unnamed,unnamed,unnamed,unnamed,unnamed,unnamed,unnamed…	Aatk,Adipor2,Akap13,Akt3,Apaf1,App,Arhgap33,Arid1a,Ass1,Atf2,Atxn1,B4galt2,Bcl2l1,Bdnf,Bhlhe22,Brsk2,Cacna2d2,Ccdc124,Cd81,Cdk5rap2,Cers1,Cit,Ckb,Clcn3,Cnp,Col1a1,Cox10,Ctnna1,Ctnnb1,Cux2,Cycs,Cyp26a1,Cyp26c1,Dag1,Dagla,Disc1,Dkk1,Dlg5,Drd1,Dst,Dync2li1,Dyrk1a,E2f1,E2f3,Efna5,Emx1,En1,En2,Eomes,Epb41l1,Erf,Esr2,Fbxo41,Fbxo45,Fbxw8,Fgfr2,Foxa2,Foxg1,Gad1,Gba,Gcm2,Gdf7,Gpc1,Gpr85,Gpt2,Grhl2,Gsc,Hhe…
Mouse Phenotype	MP:0000879	increased Purkinje cell number	118	5.45158e-21	5.15174e-17	4.36588e-19	6.47519	6.64073	43	0.000575154	0.00372423	2373	0.0213899	1	0.085181	2.61454	1.52991	4	4	0.000523013	1	unnamed,unnamed,unnamed,unnamed,unnamed,unnamed,unnamed,unnamed,unnamed,unnamed,unnamed,unnamed,unnamed,unnamed,unnamed,unnamed,unnamed,unnamed,unnamed,unnamed,unnamed,unnamed,unnamed,unnamed,unnamed,unnamed,unnamed,unnamed,unnamed,unnamed,unnamed,unnamed,unnamed,unnamed,unnamed,unnamed,unnamed,unnamed,unnamed,unnamed,unnamed,unnamed,unnamed	Atp2b2,Crybb2,Kcnj6,Rbfox2
Mouse Phenotype	MP:0005460	abnormal leukopoiesis	119	7.161e-21	6.76714e-17	5.68668e-19	1.33012	810.454	1078	0.0701935	0.0933657	292	3.92857e-08	0.00037125	1.2714e-06	1.24952	285.71	357	747	0.0466789	0.477912	unnamed,unnamed,unnamed,unnamed,unnamed,unnamed,unnamed,unnamed,unnamed,unnamed,unnamed,unnamed,unnamed,unnamed,unnamed,unnamed,unnamed,unnamed,unnamed,unnamed,unnamed,unnamed,unnamed,unnamed,unnamed,unnamed,unnamed,unnamed,unnamed,unnamed,unnamed,unnamed,unnamed,unnamed,unnamed,unnamed,unnamed,unnamed,unnamed,unnamed,unnamed,unnamed,unnamed,unnamed,unnamed,unnamed,unnamed,unnamed,unnamed,unnamed…	1810011O10Rik,Abcg1,Abl1,Ada,Adam10,Adgrg3,Aff1,Akap13,Akt3,Ank1,Apc,Ar,Arhgap17,Arid3a,Arid3b,Arid5b,Arntl,Asxl1,Atmin,Avpr1a,B9d2,Bach2,Bad,Bap1,Batf,Bcl11a,Bcl11b,Bcl2,Bcl2l1,Bcl2l11,Bhlhe40,Birc3,Blk,C3ar1,Cacnb4,Cadm1,Casp8,Cbfa2t3,Cblb,Cbx4,Ccnd1,Ccnd3,Cd180,Cd22,Cd24a,Cd28,Cd37,Cd40,Cd40lg,Cd5,Cd74,Cd81,Cd83,Cdh17,Cdkn2a,Cdkn2b,Cebpe,Cflar,Chd4,Chek2,Chordc1,Chrnb2,Cish,Col10a1,Col1a1,Creb…
Mouse Phenotype	MP:0011380	enlarged brain ventricles	120	8.10976e-21	7.66372e-17	6.38643e-19	1.63631	248.73	407	0.0215425	0.0352503	534	4.96674e-06	0.0469357	8.78945e-05	1.44902	63.4911	92	166	0.0120293	0.554217	unnamed,unnamed,unnamed,unnamed,unnamed,unnamed,unnamed,unnamed,unnamed,unnamed,unnamed,unnamed,unnamed,unnamed,unnamed,unnamed,unnamed,unnamed,unnamed,unnamed,unnamed,unnamed,unnamed,unnamed,unnamed,unnamed,unnamed,unnamed,unnamed,unnamed,unnamed,unnamed,unnamed,unnamed,unnamed,unnamed,unnamed,unnamed,unnamed,unnamed,unnamed,unnamed,unnamed,unnamed,unnamed,unnamed,unnamed,unnamed,unnamed,unnamed…	Aga,Ank2,Arnt2,Atf2,Atxn1,B4galt2,Basp1,Brsk2,Cables1,Cdc42,Cdk5rap2,Cdon,Chl1,Chn1,Clcn3,Cntn2,Col18a1,Col4a1,Csf1r,D430042O09Rik,Dclk1,Dnah5,Drd1,Eml1,Emx1,Enah,Evl,Fgfr2,Fig4,Fzd3,Gja1,Gldc,Gpm6b,Hsf2,Id2,Id3,Jhy,Kidins220,Kif20b,Kif2a,Lbr,Luzp1,Map1b,Mapk8ip3,Mkks,Mycbp2,Myh10,Nfib,Nfix,Npas3,Nr2e1,Numb,Numbl,Pdcd6ip,Pde11a,Phgdh,Plp1,Pou3f3,Prickle1,Prnp,Pros1,Psen1,Ptbp2,Rb1,Rgs4,Rhot1,Rnd3…
Mouse Phenotype	MP:0004716	abnormal cochlear nerve morphology	121	8.1402e-21	7.69249e-17	6.35743e-19	2.98265	33.8625	101	0.00293283	0.00874762	2029	0.0109402	1	0.0509535	1.9609	4.58972	9	12	0.00117678	0.75	unnamed,unnamed,unnamed,unnamed,unnamed,unnamed,unnamed,unnamed,unnamed,unnamed,unnamed,unnamed,unnamed,unnamed,unnamed,unnamed,unnamed,unnamed,unnamed,unnamed,unnamed,unnamed,unnamed,unnamed,unnamed,unnamed,unnamed,unnamed,unnamed,unnamed,unnamed,unnamed,unnamed,unnamed,unnamed,unnamed,unnamed,unnamed,unnamed,unnamed,unnamed,unnamed,unnamed,unnamed,unnamed,unnamed,unnamed,unnamed,unnamed,unnamed…	Adgrg6,Atp2b2,Cacna1d,Hoxa1,Kcnj10,Ntrk2,Ntrk3,Pax2,Sod1
Mouse Phenotype	MP:0003947	abnormal cholesterol level	122	1.90334e-20	1.79865e-16	1.47431e-18	1.37728	625.873	862	0.0542069	0.0746579	221	1.41171e-09	1.33407e-05	6.03651e-08	1.31397	223.749	294	585	0.0384414	0.502564	unnamed,unnamed,unnamed,unnamed,unnamed,unnamed,unnamed,unnamed,unnamed,unnamed,unnamed,unnamed,unnamed,unnamed,unnamed,unnamed,unnamed,unnamed,unnamed,unnamed,unnamed,unnamed,unnamed,unnamed,unnamed,unnamed,unnamed,unnamed,unnamed,unnamed,unnamed,unnamed,unnamed,unnamed,unnamed,unnamed,unnamed,unnamed,unnamed,unnamed,unnamed,unnamed,unnamed,unnamed,unnamed,unnamed,unnamed,unnamed,unnamed,unnamed…	4930402H24Rik,Abca1,Abcb11,Abcg1,Abcg5,Abcg8,Abhd5,Acads,Acot13,Adar,Adcyap1,Adgrf5,Adipor2,Adora2b,Agap2,Ahcyl1,Alb,Angptl3,Ankrd11,Ap1m2,Ap2a2,Apc,Apoa1,Apoa2,Apob,Apobec1,App,Aqp11,Aqp12,Arntl,Atad2b,Atp6ap2,Atxn2,BC048403,Bag3,Bdnf,Brd7,Bscl2,Btbd9,Cacng3,Ccdc92,Ccl2,Ccr2,Cd44,Cdca8,Cel,Chn1,Cmpk2,Col1a1,Cpe,Crhr2,Csf1,Ctage5,Ctss,Cx3cl1,Cxcl14,Cyb561,Cygb,Cyp17a1,Cyp8b1,Dab2,Dbi,Dbn1,Dclk1,D…
Mouse Phenotype	MP:0005278	abnormal cholesterol homeostasis	123	2.1431e-20	2.02523e-16	1.64653e-18	1.37349	635.608	873	0.0550501	0.0756106	211	8.7745e-10	8.2919e-06	3.92981e-08	1.3161	226.426	298	592	0.0389644	0.503378	unnamed,unnamed,unnamed,unnamed,unnamed,unnamed,unnamed,unnamed,unnamed,unnamed,unnamed,unnamed,unnamed,unnamed,unnamed,unnamed,unnamed,unnamed,unnamed,unnamed,unnamed,unnamed,unnamed,unnamed,unnamed,unnamed,unnamed,unnamed,unnamed,unnamed,unnamed,unnamed,unnamed,unnamed,unnamed,unnamed,unnamed,unnamed,unnamed,unnamed,unnamed,unnamed,unnamed,unnamed,unnamed,unnamed,unnamed,unnamed,unnamed,unnamed…	4930402H24Rik,Abca1,Abcb11,Abcg1,Abcg5,Abcg8,Abhd5,Acads,Acot13,Adar,Adcyap1,Adgrf5,Adipor2,Adora2b,Agap2,Ahcyl1,Alb,Angptl3,Ankrd11,Ap1m2,Ap2a2,Apc,Apoa1,Apoa2,Apob,Apobec1,App,Aqp11,Aqp12,Arntl,Atad2b,Atp6ap2,Atxn2,BC048403,Bag3,Bcl2,Bdnf,Brd7,Bscl2,Btbd9,Cacng3,Ccdc92,Ccl2,Ccr2,Cd44,Cdca8,Cel,Chn1,Cmpk2,Col1a1,Cpe,Crhr2,Csf1,Ctage5,Ctss,Cx3cl1,Cxcl14,Cyb561,Cygb,Cyp17a1,Cyp46a1,Cyp7b1,Cyp8b1,D…
Mouse Phenotype	MP:0009937	abnormal neuron differentiation	124	2.27665e-20	2.15144e-16	1.73503e-18	1.3623	670.19	913	0.0580452	0.079075	22	2.49056e-22	2.35358e-18	1.06981e-19	1.65395	138.457	229	362	0.0299425	0.632597	unnamed,unnamed,unnamed,unnamed,unnamed,unnamed,unnamed,unnamed,unnamed,unnamed,unnamed,unnamed,unnamed,unnamed,unnamed,unnamed,unnamed,unnamed,unnamed,unnamed,unnamed,unnamed,unnamed,unnamed,unnamed,unnamed,unnamed,unnamed,unnamed,unnamed,unnamed,unnamed,unnamed,unnamed,unnamed,unnamed,unnamed,unnamed,unnamed,unnamed,unnamed,unnamed,unnamed,unnamed,unnamed,unnamed,unnamed,unnamed,unnamed,unnamed…	Abl1,Abl2,Abr,Adgrg1,Adgrg6,Apaf1,Apbb1,Apbb2,App,Arhgap32,Ascl1,Atp2b2,Basp1,Bcl11a,Bcr,Bdnf,Bhlhe22,Brinp1,Brsk2,Cacng2,Cdh2,Cdk5r1,Cdk5r2,Celsr3,Chn1,Chn2,Chst14,Cnr1,Cntn1,Cpeb4,Crtac1,Ctnna1,Ctnnb1,Dag1,Dcc,Dclk1,Dlg5,Dll1,Ebf2,Efnb2,Egr2,Elavl4,Eml1,Emx1,Emx2,En1,Enah,Enpp2,Eomes,Epha4,Epha8,Ephb2,Ephb3,Erbb3,Evl,Ext1,Fbxo45,Fbxw7,Fezf1,Fezf2,Fgfr1,Fkrp,Foxa2,Foxc1,Foxg1,Fst,Gap43,Gata2,Gat…
Mouse Phenotype	MP:0010330	abnormal circulating lipoprotein level	125	2.41988e-20	2.28679e-16	1.82943e-18	1.50775	364.782	550	0.0315938	0.0476355	359	2.20397e-07	0.00208275	5.80155e-06	1.36411	123.157	168	322	0.0219665	0.521739	unnamed,unnamed,unnamed,unnamed,unnamed,unnamed,unnamed,unnamed,unnamed,unnamed,unnamed,unnamed,unnamed,unnamed,unnamed,unnamed,unnamed,unnamed,unnamed,unnamed,unnamed,unnamed,unnamed,unnamed,unnamed,unnamed,unnamed,unnamed,unnamed,unnamed,unnamed,unnamed,unnamed,unnamed,unnamed,unnamed,unnamed,unnamed,unnamed,unnamed,unnamed,unnamed,unnamed,unnamed,unnamed,unnamed,unnamed,unnamed,unnamed,unnamed…	Abca1,Acads,Adar,Adgrf5,Adipor2,Adora2b,Ahcyl1,Angptl3,Ankrd11,Ap2a2,Apoa1,Apoa2,Apob,Apobec1,Aqp11,Arntl,BC048403,Brd7,Bscl2,Btbd9,Cacng3,Ccl2,Cdca8,Chn1,Cmpk2,Cpe,Ctage5,Ctss,Cx3cl1,Cyb561,Cyp17a1,Dab2,Dbn1,Dclk1,Dicer1,Dnase2b,Dnmt3a,Dntt,Eif4e3,Elk4,Elmod1,Enc1,Esco1,Esr1,Esr2,Fam234b,Far2,Fasl,Fbf1,Fgg,Fgl1,Fn1,Fndc7,Foxo1,Frrs1l,Fto,Gatm,Gba,Gc,Ghrhr,Gimap6,Gpam,Gpr12,Grm3,Hif1an,Hmgcr,Hpn,…
Mouse Phenotype	MP:0005402	abnormal action potential	126	2.43555e-20	2.3016e-16	1.82666e-18	1.66262	225.548	375	0.0195348	0.0324788	381	3.90534e-07	0.00369055	9.68648e-06	1.56872	49.7219	78	130	0.0101987	0.6	unnamed,unnamed,unnamed,unnamed,unnamed,unnamed,unnamed,unnamed,unnamed,unnamed,unnamed,unnamed,unnamed,unnamed,unnamed,unnamed,unnamed,unnamed,unnamed,unnamed,unnamed,unnamed,unnamed,unnamed,unnamed,unnamed,unnamed,unnamed,unnamed,unnamed,unnamed,unnamed,unnamed,unnamed,unnamed,unnamed,unnamed,unnamed,unnamed,unnamed,unnamed,unnamed,unnamed,unnamed,unnamed,unnamed,unnamed,unnamed,unnamed,unnamed…	Ank3,Atp2b2,Bdnf,Bsn,Cacna1a,Cacna1d,Cacna1g,Ccl2,Cdh23,Chd7,Chrna9,Col1a1,Dag1,Dbx1,Dync1li1,Emx1,Emx2,Fgfr1,Fig4,Fstl1,Gabbr1,Gabrd,Gad2,Gdap1,Gria1,Grid2,Grm7,Hcn1,Hcn3,Kalrn,Kcna1,Kcna2,Kcnab1,Kcnc2,Kcne3,Kcnk3,Kcnk9,Kcnma1,Kcnmb2,Kcnmb4,Kcnn2,Kcnn3,Kcnq2,Kcnt1,Kit,Lpin1,Lrrk2,Madd,Mbp,Myo6,Neurod1,Neurod6,Nf2,Nfasc,Nfkb1,Nrcam,Oprm1,Otoa,Park7,Pax8,Pcdh15,Pde10a,Pmp22,S1pr2,Scn1a,Scn1b,Scn8a…
Mouse Phenotype	MP:0008282	enlarged hippocampus	127	3.28926e-20	3.10835e-16	2.44752e-18	5.32226	9.20661	49	0.000797385	0.00424389	2203	0.0147156	1	0.0631241	2.24103	2.67733	6	7	0.000784519	0.857143	unnamed,unnamed,unnamed,unnamed,unnamed,unnamed,unnamed,unnamed,unnamed,unnamed,unnamed,unnamed,unnamed,unnamed,unnamed,unnamed,unnamed,unnamed,unnamed,unnamed,unnamed,unnamed,unnamed,unnamed,unnamed,unnamed,unnamed,unnamed,unnamed,unnamed,unnamed,unnamed,unnamed,unnamed,unnamed,unnamed,unnamed,unnamed,unnamed,unnamed,unnamed,unnamed,unnamed,unnamed,unnamed,unnamed,unnamed,unnamed,unnamed	Agtpbp1,Akt3,Cd81,Kcna1,Mapt,Pacsin1
Mouse Phenotype	MP:0001056	abnormal cranial nerve morphology	128	5.0749e-20	4.79578e-16	3.7467e-18	1.44576	453.74	656	0.0392985	0.0568162	89	1.78765e-14	1.68933e-10	1.89812e-12	1.60438	100.974	162	264	0.021182	0.613636	unnamed,unnamed,unnamed,unnamed,unnamed,unnamed,unnamed,unnamed,unnamed,unnamed,unnamed,unnamed,unnamed,unnamed,unnamed,unnamed,unnamed,unnamed,unnamed,unnamed,unnamed,unnamed,unnamed,unnamed,unnamed,unnamed,unnamed,unnamed,unnamed,unnamed,unnamed,unnamed,unnamed,unnamed,unnamed,unnamed,unnamed,unnamed,unnamed,unnamed,unnamed,unnamed,unnamed,unnamed,unnamed,unnamed,unnamed,unnamed,unnamed,unnamed…	Actn4,Adamts3,Adarb1,Adcy3,Adgrg6,Ank2,Atg16l1,Atoh7,Atp2b2,Atp8a2,Barhl2,Bcl2,Bdnf,Bmp4,Cacna1d,Chd7,Cir1,Cln8,Cmip,Cog6,Col4a1,Ctnnb1,Cyp11a1,Cyp26a1,Dbn1,Dcc,Dlx1,Dlx2,Dst,Ebf2,Ednra,Egr1,Egr2,En1,Eomes,Erbb3,Erbb4,Fa2h,Fgf8,Fgfr1,Fkrp,Fyn,Gap43,Gbx2,Gfra1,Gjb1,Gjc2,Gli3,Grb2,Grin1,Gucy1a3,H13,Hes1,Hes3,Hoxa1,Hoxb1,Hoxb2,Hoxb3,Hoxd3,Hrk,Isl1,Itgb1,Kcnj10,Kif14,Klf7,Kmt2a,Lhx3,Lmo4,Lmx1a,Lmx1b,…
Mouse Phenotype	MP:0004098	abnormal cerebellar granule cell morphology	129	7.20348e-20	6.80729e-16	5.27697e-18	1.92447	121.072	233	0.0104861	0.0201802	776	6.94391e-05	0.6562	0.000845618	1.59777	27.5383	44	72	0.00575314	0.611111	unnamed,unnamed,unnamed,unnamed,unnamed,unnamed,unnamed,unnamed,unnamed,unnamed,unnamed,unnamed,unnamed,unnamed,unnamed,unnamed,unnamed,unnamed,unnamed,unnamed,unnamed,unnamed,unnamed,unnamed,unnamed,unnamed,unnamed,unnamed,unnamed,unnamed,unnamed,unnamed,unnamed,unnamed,unnamed,unnamed,unnamed,unnamed,unnamed,unnamed,unnamed,unnamed,unnamed,unnamed,unnamed,unnamed,unnamed,unnamed,unnamed,unnamed…	Abl1,Abl2,Abr,Akt3,Apc2,Astn1,Atp2b2,Bcr,Bid,Cacna1a,Cdk5r1,Cntn1,Eno2,Fgf13,Gja1,Grid2,Itgb1,Kcnj6,Lgi1,Lyst,Mdm2,Mdm4,Mycn,Nfia,Nfib,Nr1d1,Pax6,Pdyn,Plxna2,Pomk,Prkab1,Pten,Pura,Rb1,Ric8a,Rora,Scn8a,Sema6a,Shh,Slc12a5,Smad2,Sorcs2,Tnik,Trio
Mouse Phenotype	MP:0001469	abnormal contextual conditioning behavior	130	9.04198e-20	8.54467e-16	6.57283e-18	1.56378	292.88	458	0.0253664	0.0396674	114	2.65808e-13	2.51189e-09	2.20341e-11	1.76012	58.5189	103	153	0.0134676	0.673203	unnamed,unnamed,unnamed,unnamed,unnamed,unnamed,unnamed,unnamed,unnamed,unnamed,unnamed,unnamed,unnamed,unnamed,unnamed,unnamed,unnamed,unnamed,unnamed,unnamed,unnamed,unnamed,unnamed,unnamed,unnamed,unnamed,unnamed,unnamed,unnamed,unnamed,unnamed,unnamed,unnamed,unnamed,unnamed,unnamed,unnamed,unnamed,unnamed,unnamed,unnamed,unnamed,unnamed,unnamed,unnamed,unnamed,unnamed,unnamed,unnamed,unnamed…	Abi2,Adcy1,Adcyap1r1,Add2,Adk,Amph,App,Arc,Bdnf,Btbd9,Btg1,Cacnb3,Camk2a,Camk2b,Camk4,Camkk1,Chrm3,Clip2,Cpeb3,Ctnnb1,Ctnnd2,Disc1,Dlg4,Drd1,Dyrk1a,Efna3,Emx1,Eno2,Epha6,Erbb4,Esr2,Fez1,Fos,Gabbr2,Gabrd,Gad2,Gnai1,Gpr85,Gria2,Grin1,Grin2a,Grm1,Grm5,Grm7,Gsk3a,Gsk3b,Homer1,Hspa4,Itm2b,Itsn1,Kalrn,Kcnab2,Kcnn2,Kl,Klf9,Ksr1,Lmx1b,Lrfn2,Lrp1,Lrp8,Lrrtm1,Map2,Mapk1,Mapt,Nbea,Nlgn2,Nlgn3,Npas2,Nrep,Nrg…
Mouse Phenotype	MP:0001364	decreased anxiety-related response	131	1.33138e-19	1.25815e-15	9.6042e-18	1.60194	257.812	413	0.0223291	0.03577	243	4.8493e-09	4.58259e-05	1.88584e-07	1.60632	58.5189	94	153	0.0122908	0.614379	unnamed,unnamed,unnamed,unnamed,unnamed,unnamed,unnamed,unnamed,unnamed,unnamed,unnamed,unnamed,unnamed,unnamed,unnamed,unnamed,unnamed,unnamed,unnamed,unnamed,unnamed,unnamed,unnamed,unnamed,unnamed,unnamed,unnamed,unnamed,unnamed,unnamed,unnamed,unnamed,unnamed,unnamed,unnamed,unnamed,unnamed,unnamed,unnamed,unnamed,unnamed,unnamed,unnamed,unnamed,unnamed,unnamed,unnamed,unnamed,unnamed,unnamed…	Adamts7,Adcyap1,Adcyap1r1,Adgrl3,Akap5,Apba2,Arid3a,Atp1a3,Avpr1a,B3galt2,Brinp1,Cacna1b,Camk2a,Camk2b,Camk4,Cckbr,Chl1,Chrnb2,Chst14,Ckap5,Clcn6,Crebbp,Crebrf,Crhr1,Csgalnact1,Ddr1,Disc1,Dlg4,Dtnbp1,Dusp1,Efna3,Elfn1,En1,Erbb4,Ext1,Faah,Fos,Fosb,Foxq1,Gabrd,Gria1,Grin2a,Grin2b,Gtf2ird1,Htr1b,Itpr3,Jakmip1,Kalrn,Ldlr,Lmtk3,Lmx1b,Lsamp,Mapk1,Mapk8ip2,Mapt,Mchr1,Ndst3,Neurod6,Nfatc2,Nlgn2,Npas3,Npy…
Mouse Phenotype	MP:0008226	decreased anterior commissure size	132	1.49275e-19	1.41065e-15	1.06868e-17	2.94923	32.5509	96	0.00281923	0.00831457	600	1.30509e-05	0.123331	0.000205552	2.32403	6.88458	16	18	0.00209205	0.888889	unnamed,unnamed,unnamed,unnamed,unnamed,unnamed,unnamed,unnamed,unnamed,unnamed,unnamed,unnamed,unnamed,unnamed,unnamed,unnamed,unnamed,unnamed,unnamed,unnamed,unnamed,unnamed,unnamed,unnamed,unnamed,unnamed,unnamed,unnamed,unnamed,unnamed,unnamed,unnamed,unnamed,unnamed,unnamed,unnamed,unnamed,unnamed,unnamed,unnamed,unnamed,unnamed,unnamed,unnamed,unnamed,unnamed,unnamed,unnamed,unnamed,unnamed…	App,Arhgap5,Cables1,Dclk1,Emx1,Emx2,Gpm6b,Itpr3,Itsn1,Map1b,Map2,Map2k4,Nr2e1,Plp1,Plxna4,Rac1
Mouse Phenotype	MP:0001732	postnatal growth retardation	133	1.54521e-19	1.46022e-15	1.09791e-17	1.24125	1309.16	1625	0.113387	0.140741	33	1.01732e-20	9.61366e-17	2.91323e-18	1.37424	373.297	513	976	0.0670764	0.525615	unnamed,unnamed,unnamed,unnamed,unnamed,unnamed,unnamed,unnamed,unnamed,unnamed,unnamed,unnamed,unnamed,unnamed,unnamed,unnamed,unnamed,unnamed,unnamed,unnamed,unnamed,unnamed,unnamed,unnamed,unnamed,unnamed,unnamed,unnamed,unnamed,unnamed,unnamed,unnamed,unnamed,unnamed,unnamed,unnamed,unnamed,unnamed,unnamed,unnamed,unnamed,unnamed,unnamed,unnamed,unnamed,unnamed,unnamed,unnamed,unnamed,unnamed…	Abcb11,Acox1,Actn4,Acvr1b,Adam22,Adcyap1,Adgrg6,Adk,Agt,Alk,Ank1,Ap1m2,Apc,Apc2,Apobec2,Aqp11,Aqp4,Ar,Arid5b,Arntl,Asxl2,Atp2b2,Atp8a2,Atp8b1,Atrn,Atxn1,B4galt1,Bag3,Barhl2,Bcl2,Bcl2l11,Bcl6b,Bdnf,Bmp1,Bmp5,Bmp6,Brinp1,Bub1b,Cacna2d2,Cacnb4,Cacng2,Cacng8,Camk2b,Cap2,Car2,Cask,Casp8,Cby1,Ccnd1,Cdc42,Cdkn1c,Cdo1,Celf1,Cep120,Cftr,Chd2,Chd7,Chga,Chrm2,Chrm3,Chrnb2,Ckb,Clcn3,Clip2,Cnp,Col10a1,Col13a1…
Mouse Phenotype	MP:0002802	abnormal discrimination learning	134	1.59471e-19	1.507e-15	1.12463e-17	2.4903	51.3993	128	0.0044517	0.0110861	283	2.62875e-08	0.000248417	8.77798e-07	2.27718	11.8568	27	31	0.00353033	0.870968	unnamed,unnamed,unnamed,unnamed,unnamed,unnamed,unnamed,unnamed,unnamed,unnamed,unnamed,unnamed,unnamed,unnamed,unnamed,unnamed,unnamed,unnamed,unnamed,unnamed,unnamed,unnamed,unnamed,unnamed,unnamed,unnamed,unnamed,unnamed,unnamed,unnamed,unnamed,unnamed,unnamed,unnamed,unnamed,unnamed,unnamed,unnamed,unnamed,unnamed,unnamed,unnamed,unnamed,unnamed,unnamed,unnamed,unnamed,unnamed,unnamed,unnamed…	Acsm4,Arhgap32,Cacna1b,Cacnb3,Camkk2,Dlg4,Eno2,Gria2,Grid2,Grin1,Grin2b,Itpr3,Kcnab1,Neurl1a,Nf1,Nptx2,Nrep,Rasgrf1,Spred1,Syn1,Syn3,Syngap1,Syt4,Tbr1,Tnik,Tshz1,Ubr1
Mouse Phenotype	MP:0005419	decreased circulating serum albumin level	135	2.06792e-19	1.95419e-15	1.44754e-17	1.96824	108.727	214	0.00941684	0.0185346	853	0.000127332	1	0.00141066	1.46318	41.6899	61	109	0.00797594	0.559633	unnamed,unnamed,unnamed,unnamed,unnamed,unnamed,unnamed,unnamed,unnamed,unnamed,unnamed,unnamed,unnamed,unnamed,unnamed,unnamed,unnamed,unnamed,unnamed,unnamed,unnamed,unnamed,unnamed,unnamed,unnamed,unnamed,unnamed,unnamed,unnamed,unnamed,unnamed,unnamed,unnamed,unnamed,unnamed,unnamed,unnamed,unnamed,unnamed,unnamed,unnamed,unnamed,unnamed,unnamed,unnamed,unnamed,unnamed,unnamed,unnamed,unnamed…	Ada,Adpgk,Aff3,Agr2,Alb,Ap1m2,Ap2a2,Arl5c,Arpc1b,Atad2b,Atn1,Atp6ap2,Atp8b2,Boc,Camkmt,Cand2,Chd9,Commd9,Cyb561,Cyb5d1,Dbn1,Dclk1,Elk4,Esco1,Fgf23,Galnt18,Gatm,Gse1,Hlx,Hpse2,Jak1,Kif21b,Kl,Klf7,Ltbp1,Miga2,Nek10,Neurog3,Peli1,Pex3,Pgam5,Rcc2,Relb,Rhpn1,Rnf10,Rrm2b,Rsad1,Rspo1,Sdc4,Sez6l,Sgsm1,Slc38a10,Sptbn1,St18,Tbc1d2b,Tdp1,Tmem167,Ubr1,Wbp2,Wwox,Zmynd8
Mouse Phenotype	MP:0011085	postnatal lethality, complete penetrance	136	2.3262e-19	2.19826e-15	1.61637e-17	1.2749	1036.16	1321	0.089742	0.114412	31	5.20737e-21	4.92097e-17	1.58741e-18	1.46398	252.052	369	659	0.0482479	0.559939	unnamed,unnamed,unnamed,unnamed,unnamed,unnamed,unnamed,unnamed,unnamed,unnamed,unnamed,unnamed,unnamed,unnamed,unnamed,unnamed,unnamed,unnamed,unnamed,unnamed,unnamed,unnamed,unnamed,unnamed,unnamed,unnamed,unnamed,unnamed,unnamed,unnamed,unnamed,unnamed,unnamed,unnamed,unnamed,unnamed,unnamed,unnamed,unnamed,unnamed,unnamed,unnamed,unnamed,unnamed,unnamed,unnamed,unnamed,unnamed,unnamed,unnamed…	Acta1,Actc1,Ada,Adam22,Adar,Adarb1,Adcy3,Adcyap1,Adk,Akap8,Alpl,Angpt2,Ank1,Ank2,Ank3,Apaf1,Apc,Aplp2,App,Aqp11,Arg1,Arl3,Arnt2,Atp1b1,Atp6ap2,Atp8a2,Atxn1,Avil,Bag3,Barhl2,Bclaf1,Bdnf,Bicc1,Birc3,Bmp4,Bmp7,Cacna1a,Camta1,Casc3,Casp7,Ccm2,Cdc42,Cdkn1c,Cftr,Chd2,Chrnb2,Cit,Cnp,Cntn1,Col1a1,Col4a2,Crebbp,Crim1,Csf1r,Ctnna1,Ctnnb1,Ctnnd1,Cyfip2,Cys1,Dab1,Dclk1,Dicer1,Dlx1,Dlx2,Dnm1,Dnmt3a,Dpp9,Drd1,…
Mouse Phenotype	MP:0012317	impaired conditioning behavior	137	2.79637e-19	2.64257e-15	1.92889e-17	1.76729	163.528	289	0.0141631	0.0250303	450	1.14269e-06	0.0107985	2.39966e-05	1.58248	43.6023	69	114	0.00902197	0.605263	unnamed,unnamed,unnamed,unnamed,unnamed,unnamed,unnamed,unnamed,unnamed,unnamed,unnamed,unnamed,unnamed,unnamed,unnamed,unnamed,unnamed,unnamed,unnamed,unnamed,unnamed,unnamed,unnamed,unnamed,unnamed,unnamed,unnamed,unnamed,unnamed,unnamed,unnamed,unnamed,unnamed,unnamed,unnamed,unnamed,unnamed,unnamed,unnamed,unnamed,unnamed,unnamed,unnamed,unnamed,unnamed,unnamed,unnamed,unnamed,unnamed,unnamed…	Adk,Ankfn1,Bdnf,Cacna1b,Camk2a,Camk2b,Camk4,Chrm3,Chrna4,Cnr1,Ctnnb1,Dbn1,Drd1,Dyrk1a,Efna3,Emx1,Eno2,Erbb4,Esr2,Fgf13,Fos,Fzd3,Gabbr2,Gad2,Galr1,Gng7,Grasp,Gria2,Grin1,Grin2a,Gsk3a,Gsk3b,Homer1,Hspa4,Itm2b,Itsn1,Kcnab2,Klf9,Ksr1,Lrp1,Mapk1,Mapt,Ncf1,Nlgn2,Nlgn3,Nrep,Nrn1,Oprm1,Pde10a,Pde4b,Pdyn,Plat,Pomc,Pomk,Rai1,Rasgrf1,Rgs4,Slc17a6,Slc6a1,Slc6a3,Sorbs2,Sp4,Stx1a,Syngap1,Tmem108,Ube3a,Uhrf2,Ww…
Mouse Phenotype	MP:0011100	preweaning lethality, complete penetrance	138	4.55846e-19	4.30775e-15	3.12156e-17	1.31447	805.649	1059	0.0697773	0.0917201	1260	0.00129714	1	0.00972858	1.13382	311.336	353	814	0.0461559	0.433661	unnamed,unnamed,unnamed,unnamed,unnamed,unnamed,unnamed,unnamed,unnamed,unnamed,unnamed,unnamed,unnamed,unnamed,unnamed,unnamed,unnamed,unnamed,unnamed,unnamed,unnamed,unnamed,unnamed,unnamed,unnamed,unnamed,unnamed,unnamed,unnamed,unnamed,unnamed,unnamed,unnamed,unnamed,unnamed,unnamed,unnamed,unnamed,unnamed,unnamed,unnamed,unnamed,unnamed,unnamed,unnamed,unnamed,unnamed,unnamed,unnamed,unnamed…	9130011E15Rik,Aars2,Abca1,Ackr3,Acvr1,Acvr1b,Adamts3,Adar,Adgrg6,Ahcy,Ank1,Ankrd11,Anks6,Anp32a,Anp32e,Apc,Arhgef11,Arhgef12,Arhgef7,Arid3a,Arpc3,Ascc2,Asf1a,Atad3a,Atl2,Atmin,Atp1a1,Atp1a3,Atp2a2,Atp5b,Atp6v0a1,Atp6v0a4,Atp8a2,Atxn10,Axin2,B4galt5,B9d1,B9d2,Bag3,Bap1,Bbs10,Bcl7a,Bclaf1,Bmp10,Bmp7,Cacna1a,Cacna1s,Cald1,Casq2,Casz1,Cbx4,Cdipt,Cdk8,Cdkn1c,Cdkn2a,Cds2,Celf4,Cenpo,Cep164,Cftr,Chd4,Ch…
Mouse Phenotype	MP:0005291	abnormal glucose tolerance	139	4.89598e-19	4.6267e-15	3.32856e-17	1.35505	647.944	878	0.0561185	0.0760437	220	1.3566e-09	1.28199e-05	5.82721e-08	1.32649	208.067	276	544	0.0360879	0.507353	unnamed,unnamed,unnamed,unnamed,unnamed,unnamed,unnamed,unnamed,unnamed,unnamed,unnamed,unnamed,unnamed,unnamed,unnamed,unnamed,unnamed,unnamed,unnamed,unnamed,unnamed,unnamed,unnamed,unnamed,unnamed,unnamed,unnamed,unnamed,unnamed,unnamed,unnamed,unnamed,unnamed,unnamed,unnamed,unnamed,unnamed,unnamed,unnamed,unnamed,unnamed,unnamed,unnamed,unnamed,unnamed,unnamed,unnamed,unnamed,unnamed,unnamed…	Abcc8,Abhd5,Acot13,Adcyap1r1,Adgrf5,Adipor2,Adra2a,Afap1l2,Agap2,Ago2,Akap5,Akt3,Alb,Aldh1b1,Angptl2,Ank2,Apob,Appl1,Appl2,Ar,Arfgef3,Arhgap24,Arhgef15,Arntl,Atf2,Bad,Baiap2l1,Bbs10,Bcl2,Bmp10,Bscl2,Bves,Cacna1b,Cacna1d,Cacna1e,Cadps,Cadps2,Camkk2,Cartpt,Cavin1,Ccdc80,Ccl2,Cdkal1,Celf4,Cep19,Cers6,Chgb,Chrm3,Clec16a,Col1a1,Commd9,Cox4i2,Cpe,Crat,Creb5,Crebbp,Crtc1,Cry2,Csf2,Csmd1,Ctdspl,Cxcl14,Cy…
Mouse Phenotype	MP:0005179	decreased circulating cholesterol level	140	6.2162e-19	5.87431e-15	4.19594e-17	1.49824	349.745	524	0.0302914	0.0453837	259	8.81091e-09	8.32631e-05	3.21479e-07	1.41982	115.508	164	302	0.0214435	0.543046	unnamed,unnamed,unnamed,unnamed,unnamed,unnamed,unnamed,unnamed,unnamed,unnamed,unnamed,unnamed,unnamed,unnamed,unnamed,unnamed,unnamed,unnamed,unnamed,unnamed,unnamed,unnamed,unnamed,unnamed,unnamed,unnamed,unnamed,unnamed,unnamed,unnamed,unnamed,unnamed,unnamed,unnamed,unnamed,unnamed,unnamed,unnamed,unnamed,unnamed,unnamed,unnamed,unnamed,unnamed,unnamed,unnamed,unnamed,unnamed,unnamed,unnamed…	4930402H24Rik,Abca1,Abcg5,Abcg8,Acads,Adgrf5,Adipor2,Ahcyl1,Angptl3,Apoa1,Apoa2,Apob,Apobec1,Arntl,Atad2b,BC048403,Bag3,Brd7,Ccdc92,Cel,Chn1,Col1a1,Crhr2,Ctage5,Ctss,Cx3cl1,Cxcl14,Cyb561,Cygb,Cyp8b1,Dbn1,Dclk1,Dhcr24,Dhx40,Dll1,Dnmt3a,Dusp1,Dync1i2,Eif4e3,Elk4,Elmod1,Elovl6,Enc1,Esco1,Fabp5,Fam234b,Far2,Fasl,Fasn,Fbf1,Fgl1,Fn1,Foxo1,Foxo6,Frrs1l,Fto,G6pc3,Gatm,Gba,Gc,Ghrhr,Gpam,Gpat3,Hif1an,Hmgcr…
Mouse Phenotype	MP:0002727	decreased circulating insulin level	141	6.53026e-19	6.1711e-15	4.37667e-17	1.46333	398.407	583	0.0345061	0.0504937	370	3.10844e-07	0.00293748	7.93913e-06	1.35481	126.217	171	330	0.0223588	0.518182	unnamed,unnamed,unnamed,unnamed,unnamed,unnamed,unnamed,unnamed,unnamed,unnamed,unnamed,unnamed,unnamed,unnamed,unnamed,unnamed,unnamed,unnamed,unnamed,unnamed,unnamed,unnamed,unnamed,unnamed,unnamed,unnamed,unnamed,unnamed,unnamed,unnamed,unnamed,unnamed,unnamed,unnamed,unnamed,unnamed,unnamed,unnamed,unnamed,unnamed,unnamed,unnamed,unnamed,unnamed,unnamed,unnamed,unnamed,unnamed,unnamed,unnamed…	A430005L14Rik,Abhd5,Adcy3,Adcyap1r1,Adipor2,Afap1l2,Agap1,Ago2,Akap5,Ank2,Anks1b,Apbb2,Apoa2,Arntl,Arrdc3,Bach2,Bad,Bag3,Baiap2,Cacna1b,Cacna1d,Caskin1,Caskin2,Ccdc80,Ccl2,Cdk4,Cdkal1,Cebpb,Cel,Cers6,Chn1,Chrm3,Cldn19,Cnr1,Col1a1,Col4a3bp,Cpe,Crtc3,Csf2,Cxcl14,Daam2,Dixdc1,E2f1,Elovl6,Emx1,Eogt,Extl3,Fabp5,Fasn,Ffar2,Fgf23,Foxa2,Foxo1,Foxo3,Foxo6,Fto,G0s2,Gab1,Gatm,Gcg,Gipr,Glis3,Glp1r,Golga7,Gpa…
Mouse Phenotype	MP:0000585	kinked tail	142	7.62827e-19	7.20872e-15	5.07656e-17	1.72449	176.864	305	0.0153182	0.0264161	602	1.30783e-05	0.12359	0.000205299	1.49703	47.4271	71	124	0.00928347	0.572581	unnamed,unnamed,unnamed,unnamed,unnamed,unnamed,unnamed,unnamed,unnamed,unnamed,unnamed,unnamed,unnamed,unnamed,unnamed,unnamed,unnamed,unnamed,unnamed,unnamed,unnamed,unnamed,unnamed,unnamed,unnamed,unnamed,unnamed,unnamed,unnamed,unnamed,unnamed,unnamed,unnamed,unnamed,unnamed,unnamed,unnamed,unnamed,unnamed,unnamed,unnamed,unnamed,unnamed,unnamed,unnamed,unnamed,unnamed,unnamed,unnamed,unnamed…	Apaf1,Apc,Axin2,Bmp4,Bmp7,Cask,Chst14,Csf1r,Ctnnb1,Cyld,Cyp26a1,Dkk1,Dlg1,Dmrt2,Dst,Edar,Egr2,Etl4,Fgf9,Fgfr3,Fn1,Fos,Igf2bp1,Igf2r,Itpr3,Kntc1,Lasp1,Lfng,Lmna,Lmx1a,Lrp2,Lrp6,Mdfi,Mdm2,Mdm4,Mthfr,Mycn,Ndc1,Nov,Npr3,Pa2g4,Pax1,Pax3,Pgap3,Prickle1,Prkra,Psen1,Pstpip2,Pxdn,Ror2,Rpl31,Rpl38,Sall4,Sc5d,Sfrp2,Smurf2,Sox10,Sox11,Sp8,Spred1,Sulf2,T,Taf4,Tbx1,Tfpi,Tgif1,Traf6,Wnt3,Zbtb16,Zic2,Zic3
Mouse Phenotype	MP:0001901	absence of NMDA-mediated synaptic currents	143	1.275e-18	1.20488e-14	8.42571e-17	5.56582	7.72572	43	0.000669125	0.00372423	3112	0.0559383	1	0.169864	2.61454	1.14743	3	3	0.000392259	1	unnamed,unnamed,unnamed,unnamed,unnamed,unnamed,unnamed,unnamed,unnamed,unnamed,unnamed,unnamed,unnamed,unnamed,unnamed,unnamed,unnamed,unnamed,unnamed,unnamed,unnamed,unnamed,unnamed,unnamed,unnamed,unnamed,unnamed,unnamed,unnamed,unnamed,unnamed,unnamed,unnamed,unnamed,unnamed,unnamed,unnamed,unnamed,unnamed,unnamed,unnamed,unnamed,unnamed	Grik4,Grin1,Grin2b
Mouse Phenotype	MP:0009644	uremia	144	1.6051e-18	1.51682e-14	1.05335e-16	1.55666	279.445	435	0.0242028	0.0376754	406	5.38627e-07	0.00509003	1.2537e-05	1.41207	90.6469	128	237	0.0167364	0.540084	unnamed,unnamed,unnamed,unnamed,unnamed,unnamed,unnamed,unnamed,unnamed,unnamed,unnamed,unnamed,unnamed,unnamed,unnamed,unnamed,unnamed,unnamed,unnamed,unnamed,unnamed,unnamed,unnamed,unnamed,unnamed,unnamed,unnamed,unnamed,unnamed,unnamed,unnamed,unnamed,unnamed,unnamed,unnamed,unnamed,unnamed,unnamed,unnamed,unnamed,unnamed,unnamed,unnamed,unnamed,unnamed,unnamed,unnamed,unnamed,unnamed,unnamed…	Adgrf5,Adora1,Agt,Ank1,Apc,App,Aqp11,Ar,Arid5b,Arl8b,Arntl,Atp6ap2,Atp6v0a4,Atp8a1,BC048403,Baz1a,Bcl2,Bcl2l11,Bcr,Bdkrb2,Bicc1,Bphl,Cacna1b,Camkmt,Car7,Ccni,Cfh,Chd2,Cldn10,Col18a1,Col4a1,Col4a4,Cux1,Cyp17a1,Cys1,D7Ertd443e,Daam1,Dbn1,Dctn1,Ddc,Dlg5,Dusp1,Edn2,Elmod1,Fgf23,Gcnt2,Gimap6,Glis2,Gm13547,Gnao1,Gne,Gpr22,Gpsm1,Gria1,Hnrnpd,Htr4,Ifng,Ikzf3,Itgb1,Jag1,Jarid2,Kdm4b,Kif3a,Large1,Lat,Lep,L…
Mouse Phenotype	MP:0000516	abnormal renal/urinary system morphology	145	1.96231e-18	1.85439e-14	1.27889e-16	1.23784	1267.53	1569	0.109781	0.135891	93	2.26361e-14	2.13911e-10	2.30012e-12	1.30459	373.297	487	976	0.0636768	0.498975	unnamed,unnamed,unnamed,unnamed,unnamed,unnamed,unnamed,unnamed,unnamed,unnamed,unnamed,unnamed,unnamed,unnamed,unnamed,unnamed,unnamed,unnamed,unnamed,unnamed,unnamed,unnamed,unnamed,unnamed,unnamed,unnamed,unnamed,unnamed,unnamed,unnamed,unnamed,unnamed,unnamed,unnamed,unnamed,unnamed,unnamed,unnamed,unnamed,unnamed,unnamed,unnamed,unnamed,unnamed,unnamed,unnamed,unnamed,unnamed,unnamed,unnamed…	A830005F24Rik,Abca1,Acot4,Actn4,Ada,Adamts3,Add2,Adra1a,Aga,Agrn,Agt,Agtr1b,Akap11,Ank1,Ank3,Ankrd26,Ap3b1,Apc,Aqp11,Ar,Arid5b,Arl3,Arntl,Arsg,Atad2b,Atmin,Atp2a2,Atp6ap2,Atp6v0a4,B4galnt1,B9d1,Bbs10,Bcl2,Bcl2l11,Bcr,Bdkrb2,Bhlhe40,Bicc1,Bmp10,Bmp4,Bmp5,Bmp7,Bmper,Boc,Bscl2,C1qa,C4b,Cacna2d1,Cald1,Car2,Caskin1,Casp8,Cavin1,Cck,Cckbr,Ccni,Ccr2,Cd180,Cd40,Cd40lg,Cdc42,Cdc73,Cdh4,Cdh6,Cdkn1c,Cdkn2b,…
Mouse Phenotype	MP:0002444	abnormal T cell physiology	146	3.05276e-18	2.88486e-14	1.97593e-16	1.32948	708.549	942	0.0613675	0.0815867	475	1.8383e-06	0.017372	3.65725e-05	1.22629	259.319	318	678	0.0415795	0.469027	unnamed,unnamed,unnamed,unnamed,unnamed,unnamed,unnamed,unnamed,unnamed,unnamed,unnamed,unnamed,unnamed,unnamed,unnamed,unnamed,unnamed,unnamed,unnamed,unnamed,unnamed,unnamed,unnamed,unnamed,unnamed,unnamed,unnamed,unnamed,unnamed,unnamed,unnamed,unnamed,unnamed,unnamed,unnamed,unnamed,unnamed,unnamed,unnamed,unnamed,unnamed,unnamed,unnamed,unnamed,unnamed,unnamed,unnamed,unnamed,unnamed,unnamed…	Abi2,Acaca,Adcyap1,Akt3,Apc,Appl1,Arhgef1,Arhgef12,Arhgef6,Art2b,B9d2,Bad,Batf3,Bcat1,Bcl11b,Bcl2,Bcl2l1,Bcl2l11,Bcl6b,Bclaf1,Bhlhe40,Birc3,Birc6,C3ar1,Cacnb3,Cacnb4,Cadm1,Casp7,Casp8,Cblb,Ccdc88b,Ccl1,Ccl2,Ccnd3,Ccr2,Cd22,Cd276,Cd28,Cd40lg,Cd44,Cd5,Cd74,Cd81,Cd83,Cd84,Ceacam1,Cebpb,Cflar,Chd4,Chrm1,Chst3,Cish,Clnk,Cmah,Col1a1,Cops8,Coro1a,Cry2,Ctla4,Ctss,Cyp11a1,Dck,Def6,Dgkz,Diaph1,Dicer1,Dlg1,…
Mouse Phenotype	MP:0000876	Purkinje cell degeneration	147	3.31685e-18	3.13443e-14	2.13226e-16	1.97412	100.298	198	0.00868681	0.0171488	1668	0.00461597	1	0.0261517	1.38797	30.9806	43	81	0.00562238	0.530864	unnamed,unnamed,unnamed,unnamed,unnamed,unnamed,unnamed,unnamed,unnamed,unnamed,unnamed,unnamed,unnamed,unnamed,unnamed,unnamed,unnamed,unnamed,unnamed,unnamed,unnamed,unnamed,unnamed,unnamed,unnamed,unnamed,unnamed,unnamed,unnamed,unnamed,unnamed,unnamed,unnamed,unnamed,unnamed,unnamed,unnamed,unnamed,unnamed,unnamed,unnamed,unnamed,unnamed,unnamed,unnamed,unnamed,unnamed,unnamed,unnamed,unnamed…	Abcd2,Aff1,Aga,Agtpbp1,Ank1,Ank3,App,Arsa,Atg7,B4galnt1,Cacna1a,Cacna2d2,Camta1,Cers1,Ctsb,Dnajc3,Eef1a2,En1,Gjc2,Grid2,Herc1,Hexb,Inpp4a,Kl,Map1a,Naglu,Ndufs4,Pdss2,Ppt1,Prnp,Psap,Pten,Qk,Rora,Sacs,Scn8a,Sil1,Slc9a1,Smpd1,Sptbn2,Tsc2,Ube4b,Ugcg
Mouse Phenotype	MP:0000951	sporadic seizures	148	3.42019e-18	3.23208e-14	2.18384e-16	2.6061	41.8249	109	0.00362246	0.0094405	855	0.000131641	1	0.00145498	1.84556	13.0042	24	34	0.00313808	0.705882	unnamed,unnamed,unnamed,unnamed,unnamed,unnamed,unnamed,unnamed,unnamed,unnamed,unnamed,unnamed,unnamed,unnamed,unnamed,unnamed,unnamed,unnamed,unnamed,unnamed,unnamed,unnamed,unnamed,unnamed,unnamed,unnamed,unnamed,unnamed,unnamed,unnamed,unnamed,unnamed,unnamed,unnamed,unnamed,unnamed,unnamed,unnamed,unnamed,unnamed,unnamed,unnamed,unnamed,unnamed,unnamed,unnamed,unnamed,unnamed,unnamed,unnamed…	Akt3,Cacna1a,Camk2a,Cntn2,Emx1,Gabbr1,Gjb1,Gjc2,Gnao1,Hexb,Kcnab2,Kcnc2,Kif5a,Mbp,Neurod1,Neurod2,Nid1,Npy,Numb,Numbl,Pten,Sox10,Tsc1,Unc13b
Mouse Phenotype	MP:0012556	increased cell death	149	3.97173e-18	3.75329e-14	2.51898e-16	1.26089	1062.74	1340	0.092044	0.116057	95	3.35095e-14	3.16665e-10	3.33331e-12	1.32237	331.225	438	866	0.0572699	0.505774	unnamed,unnamed,unnamed,unnamed,unnamed,unnamed,unnamed,unnamed,unnamed,unnamed,unnamed,unnamed,unnamed,unnamed,unnamed,unnamed,unnamed,unnamed,unnamed,unnamed,unnamed,unnamed,unnamed,unnamed,unnamed,unnamed,unnamed,unnamed,unnamed,unnamed,unnamed,unnamed,unnamed,unnamed,unnamed,unnamed,unnamed,unnamed,unnamed,unnamed,unnamed,unnamed,unnamed,unnamed,unnamed,unnamed,unnamed,unnamed,unnamed,unnamed…	4930447C04Rik,A1cf,Abl1,Abl2,Actc1,Acvr1,Adar,Adcyap1,Adgrg3,Agr2,Akap6,Akt3,Aldh1b1,Amn,Antxr2,Apaf1,Apc,Apc2,Arid3b,Astn1,Asxl1,Atf2,Atg7,Atmin,Atp6ap2,Avil,Babam2,Bag3,Bcl11a,Bcl11b,Bcl2,Bcl2l1,Bcl2l11,Bdnf,Birc6,Bmp4,Brd1,Btg1,Btrc,Bub1b,C1qa,Cacna1a,Caprin1,Cask,Casp8,Cast,Ccbe1,Ccni,Ccr2,Cd22,Cd28,Cd44,Cdc42,Cdc73,Cdca8,Cdh4,Cdh5,Cdk12,Cdk5rap2,Cdkn1c,Cdkn2a,Cebpb,Cers1,Cflar,Chd4,Chd7,Cit,…
Mouse Phenotype	MP:0002590	increased mean corpuscular volume	150	3.98408e-18	3.76496e-14	2.50997e-16	1.85952	124.763	232	0.0108058	0.0200935	3962	0.121361	1	0.289464	1.13061	56.6065	64	148	0.0083682	0.432432	unnamed,unnamed,unnamed,unnamed,unnamed,unnamed,unnamed,unnamed,unnamed,unnamed,unnamed,unnamed,unnamed,unnamed,unnamed,unnamed,unnamed,unnamed,unnamed,unnamed,unnamed,unnamed,unnamed,unnamed,unnamed,unnamed,unnamed,unnamed,unnamed,unnamed,unnamed,unnamed,unnamed,unnamed,unnamed,unnamed,unnamed,unnamed,unnamed,unnamed,unnamed,unnamed,unnamed,unnamed,unnamed,unnamed,unnamed,unnamed,unnamed,unnamed…	Appl1,Appl2,Arrb1,Bhlhe40,Bmp7,Btg2,Btrc,Cd300lg,Cd74,Cdk5rap2,Chn1,Clstn1,Col1a1,Cyb5d1,Dact2,Dkk3,Elmod1,Enc1,Esyt3,Exoc6,Fam210a,Fam53b,Fancc,Fbxo7,Foxo3,Gpi1,Hfe2,Hk1,Hpcal4,Irf8,Itch,Itgb3,Kcnb1,Kit,Kitl,Klf13,Ldha,Lmo2,Lyst,Mamstr,Nptn,Osm,Pa2g4,Pdgfb,Piezo1,Pklr,Polg,Prkg1,Rad18,Rhou,Rpa1,Rps6kl1,Sdc4,Serpinb5,Slc38a10,Smap1,Sod1,Sorbs2,Tbc1d4,Tet2,Timp3,Trrap,Xbp1,Zscan2
Mouse Phenotype	MP:0001776	abnormal circulating sodium level	151	4.1258e-18	3.89888e-14	2.58204e-16	1.87906	119.741	225	0.0103707	0.0194873	887	0.000179933	1	0.00191699	1.44988	42.0724	61	110	0.00797594	0.554546	unnamed,unnamed,unnamed,unnamed,unnamed,unnamed,unnamed,unnamed,unnamed,unnamed,unnamed,unnamed,unnamed,unnamed,unnamed,unnamed,unnamed,unnamed,unnamed,unnamed,unnamed,unnamed,unnamed,unnamed,unnamed,unnamed,unnamed,unnamed,unnamed,unnamed,unnamed,unnamed,unnamed,unnamed,unnamed,unnamed,unnamed,unnamed,unnamed,unnamed,unnamed,unnamed,unnamed,unnamed,unnamed,unnamed,unnamed,unnamed,unnamed,unnamed…	Ajap1,Anxa6,Bach1,Brms1,C9,Cacna1b,Cacna2d3,Camkmt,Ccdc57,Cd84,Cers5,Chek2,Chn1,Cpa2,Cyb5d1,Cyp11a1,Cyp2c44,D1Ertd622e,Dusp4,Dync1i2,Edn1,Elk4,Entpd1,Fam49b,Fkbp9,Gad2,Grin2d,Guca2b,Gys2,H1fx,Hsf2,Irf8,Itga8,Kcne1,Kcnj1,Kif1b,Leprotl1,Myl12b,Nacad,Ncald,Ndufa8,Nedd4l,Nfkb1,Nr3c2,Pex26,Pnmt,Pola2,Ramp1,Rnf10,Rxfp2,Scnn1b,Sesn3,Slc24a5,Slc38a10,Slc4a4,Slc5a2,Slc6a3,Slc8a3,Slco1b2,Txnip,Wwox
Mouse Phenotype	MP:0012762	abnormal alpha-beta T cell morphology	152	4.2597e-18	4.02542e-14	2.6483e-16	1.29772	841.477	1092	0.0728804	0.0945782	520	3.42929e-06	0.0324068	6.23207e-05	1.20464	297.184	358	777	0.0468096	0.460747	unnamed,unnamed,unnamed,unnamed,unnamed,unnamed,unnamed,unnamed,unnamed,unnamed,unnamed,unnamed,unnamed,unnamed,unnamed,unnamed,unnamed,unnamed,unnamed,unnamed,unnamed,unnamed,unnamed,unnamed,unnamed,unnamed,unnamed,unnamed,unnamed,unnamed,unnamed,unnamed,unnamed,unnamed,unnamed,unnamed,unnamed,unnamed,unnamed,unnamed,unnamed,unnamed,unnamed,unnamed,unnamed,unnamed,unnamed,unnamed,unnamed,unnamed…	2010300C02Rik,Abca4,Abcg1,Actl10,Ada,Adam10,Adcyap1,Adpgk,Aff1,Akt3,Alg13,Ankrd9,Apc,Arap2,Arhgef1,Arhgef6,Arid1b,Arid3b,Arid5b,Armc7,Asxl1,Atf2,Atg7,B9d2,Bach2,Bap1,Batf,Bcl11a,Bcl11b,Bcl2,Bcl2l1,Bcl2l11,Bcl6b,Bclaf1,Bhlhe40,C3ar1,Cacnb4,Cadm1,Casp8,Cblb,Cbx4,Ccdc88b,Ccl2,Ccl25,Ccnd3,Ccr2,Cd180,Cd28,Cd40lg,Cd44,Cd47,Cd5,Cd74,Cd83,Cd84,Cdkal1,Cdkn2a,Cflar,Chd2,Chd4,Chd9,Cish,Cnot4,Cog6,Col10a1,Co…
Mouse Phenotype	MP:0002920	decreased paired-pulse facilitation	153	5.18215e-18	4.89713e-14	3.20074e-16	2.4383	50.0349	122	0.00433353	0.0105664	838	0.000116999	1	0.00131938	1.8792	12.2393	23	32	0.00300732	0.71875	unnamed,unnamed,unnamed,unnamed,unnamed,unnamed,unnamed,unnamed,unnamed,unnamed,unnamed,unnamed,unnamed,unnamed,unnamed,unnamed,unnamed,unnamed,unnamed,unnamed,unnamed,unnamed,unnamed,unnamed,unnamed,unnamed,unnamed,unnamed,unnamed,unnamed,unnamed,unnamed,unnamed,unnamed,unnamed,unnamed,unnamed,unnamed,unnamed,unnamed,unnamed,unnamed,unnamed,unnamed,unnamed,unnamed,unnamed,unnamed,unnamed,unnamed…	Atxn1,Camk2a,Chrm1,Emx1,Grik3,Grik4,Grik5,Grm4,Mapk9,Pfn2,Psen1,Rap1a,Rap1b,Rbfox3,Rims1,Rnf112,Rock2,Snap25,Syngr1,Syp,Uchl1,Vdac1,Vdac3
Mouse Phenotype	MP:0008284	abnormal hippocampus pyramidal cell layer	154	5.45477e-18	5.15476e-14	3.34724e-16	1.87125	120.775	226	0.0104603	0.0195739	384	4.06557e-07	0.00384197	1.00051e-05	1.69351	33.6579	57	88	0.00745293	0.647727	unnamed,unnamed,unnamed,unnamed,unnamed,unnamed,unnamed,unnamed,unnamed,unnamed,unnamed,unnamed,unnamed,unnamed,unnamed,unnamed,unnamed,unnamed,unnamed,unnamed,unnamed,unnamed,unnamed,unnamed,unnamed,unnamed,unnamed,unnamed,unnamed,unnamed,unnamed,unnamed,unnamed,unnamed,unnamed,unnamed,unnamed,unnamed,unnamed,unnamed,unnamed,unnamed,unnamed,unnamed,unnamed,unnamed,unnamed,unnamed,unnamed,unnamed…	Abi2,Apc2,Arpc3,Atg7,Atp1a3,C1qa,Cacng8,Cadps,Cd81,Cdk5r1,Ckap5,Clcn3,Clstn3,Cpeb3,Crmp1,Csf1,Ctnna2,Ctnnd1,Ctsb,Dab1,Dclk2,Dlg4,Dpysl4,Efna3,Emx1,Epg5,Foxg1,Fyn,Islr2,Kalrn,Kcnj6,Klf7,Lmx1a,Lrp8,Lyst,Macf1,Mapt,Mkl1,Mkl2,Ncam1,Ndel1,Neurod6,Nr4a3,Psen1,Pten,Rac1,Shank1,Slc1a2,Syn1,Syngap1,Tnr,Trib2,Tsc1,Tsc2,Tuba1a,Ywhaz,Zbtb18
Mouse Phenotype	MP:0006042	increased apoptosis	155	7.48947e-18	7.07755e-14	4.56616e-16	1.25893	1060.43	1335	0.0918437	0.115625	91	1.87211e-14	1.76914e-10	1.94411e-12	1.32705	328.547	436	859	0.0570084	0.507567	unnamed,unnamed,unnamed,unnamed,unnamed,unnamed,unnamed,unnamed,unnamed,unnamed,unnamed,unnamed,unnamed,unnamed,unnamed,unnamed,unnamed,unnamed,unnamed,unnamed,unnamed,unnamed,unnamed,unnamed,unnamed,unnamed,unnamed,unnamed,unnamed,unnamed,unnamed,unnamed,unnamed,unnamed,unnamed,unnamed,unnamed,unnamed,unnamed,unnamed,unnamed,unnamed,unnamed,unnamed,unnamed,unnamed,unnamed,unnamed,unnamed,unnamed…	4930447C04Rik,A1cf,Abl1,Abl2,Actc1,Acvr1,Adar,Adcyap1,Adgrg3,Agr2,Akap6,Akt3,Aldh1b1,Amn,Antxr2,Apaf1,Apc,Apc2,Arid3b,Astn1,Asxl1,Atf2,Atg7,Atmin,Atp6ap2,Avil,Babam2,Bag3,Bcl11a,Bcl11b,Bcl2,Bcl2l1,Bcl2l11,Bdnf,Birc6,Bmp4,Brd1,Btg1,Btrc,Bub1b,C1qa,Cacna1a,Caprin1,Cask,Casp8,Cast,Ccbe1,Ccni,Ccr2,Cd22,Cd28,Cd44,Cdc42,Cdc73,Cdca8,Cdh4,Cdh5,Cdk12,Cdk5rap2,Cdkn1c,Cdkn2a,Cebpb,Cers1,Cflar,Chd4,Chd7,Cit,…
Mouse Phenotype	MP:0002272	abnormal nervous system electrophysiology	156	8.73247e-18	8.25219e-14	5.28986e-16	1.36022	588.14	800	0.0509389	0.0692881	40	1.84052e-19	1.73929e-15	4.34822e-17	1.62361	131.189	213	343	0.0278504	0.620991	unnamed,unnamed,unnamed,unnamed,unnamed,unnamed,unnamed,unnamed,unnamed,unnamed,unnamed,unnamed,unnamed,unnamed,unnamed,unnamed,unnamed,unnamed,unnamed,unnamed,unnamed,unnamed,unnamed,unnamed,unnamed,unnamed,unnamed,unnamed,unnamed,unnamed,unnamed,unnamed,unnamed,unnamed,unnamed,unnamed,unnamed,unnamed,unnamed,unnamed,unnamed,unnamed,unnamed,unnamed,unnamed,unnamed,unnamed,unnamed,unnamed,unnamed…	Abcd2,Adgrb3,Adora1,Ank3,Ap3m2,Arc,Asic2,Atp2b2,Bdnf,Bid,Bsn,C1ql1,Cacna1a,Cacna1b,Cacna1d,Cacna1g,Cacna2d2,Cacnb4,Cacng2,Cadm4,Calb1,Calb2,Ccl2,Cdh23,Chd7,Chn1,Chrm1,Chrm2,Chrm3,Chrm4,Chrna4,Chrna9,Chrnb2,Clcn2,Cnp,Cntnap2,Col1a1,Dag1,Dagla,Dbx1,Dnm1,Dpp6,Drd1,Drd4,Dync1li1,Ebf2,Egr2,Egr3,Elavl3,Elfn1,Emx1,Emx2,En1,Epb41l3,Epha4,Erbb3,Erbin,Fgfr1,Fig4,Fos,Foxo6,Fstl1,Gabbr1,Gabbr2,Gabrb1,Gabrd,G…
Mouse Phenotype	MP:0013661	abnormal myeloid cell number	157	9.23463e-18	8.72672e-14	5.55842e-16	1.3533	608.145	823	0.0526715	0.0712801	929	0.000243384	1	0.00247576	1.18843	214.569	255	561	0.033342	0.454545	unnamed,unnamed,unnamed,unnamed,unnamed,unnamed,unnamed,unnamed,unnamed,unnamed,unnamed,unnamed,unnamed,unnamed,unnamed,unnamed,unnamed,unnamed,unnamed,unnamed,unnamed,unnamed,unnamed,unnamed,unnamed,unnamed,unnamed,unnamed,unnamed,unnamed,unnamed,unnamed,unnamed,unnamed,unnamed,unnamed,unnamed,unnamed,unnamed,unnamed,unnamed,unnamed,unnamed,unnamed,unnamed,unnamed,unnamed,unnamed,unnamed,unnamed…	1810011O10Rik,Abca1,Abcb10,Abcg5,Actl6a,Adam10,Adamts7,Add2,Add3,Agap1,Ago2,Ank1,Anxa7,Arntl,Arrb1,Arsg,Asxl1,Atmin,Atp6v1c1,Atp8a1,B4galt1,Bach2,Bap1,Bcl11a,Bcl2l1,Bcl2l11,Bcl6b,Bcr,Bmp4,Bmp7,Brd1,Btg2,Bub1b,Casp8,Cbfa2t3,Ccbe1,Ccdc88b,Ccna1,Ccnd1,Ccnd3,Cd33,Cd40lg,Cd47,Cd74,Cdc42,Cdk4,Cdk5rap2,Cdkn1c,Cdkn2b,Cfh,Cflar,Chd2,Chordc1,Chrnb2,Col1a1,Col4a1,Col4a2,Cpeb4,Csf1,Csf2,Csf3r,Csnk1a1,Ctnna2,…
Mouse Phenotype	MP:0003008	enhanced long term potentiation	158	1.09772e-17	1.03735e-13	6.56548e-16	1.83159	128.85	236	0.0111597	0.02044	566	8.49123e-06	0.0802421	0.000141771	1.70341	25.2434	43	66	0.00562238	0.651515	unnamed,unnamed,unnamed,unnamed,unnamed,unnamed,unnamed,unnamed,unnamed,unnamed,unnamed,unnamed,unnamed,unnamed,unnamed,unnamed,unnamed,unnamed,unnamed,unnamed,unnamed,unnamed,unnamed,unnamed,unnamed,unnamed,unnamed,unnamed,unnamed,unnamed,unnamed,unnamed,unnamed,unnamed,unnamed,unnamed,unnamed,unnamed,unnamed,unnamed,unnamed,unnamed,unnamed,unnamed,unnamed,unnamed,unnamed,unnamed,unnamed,unnamed…	Adk,Aff2,Akap5,Ap3m2,Arc,Arhgef9,Baiap2,Btbd9,Cacnb3,Camk2a,Clstn1,Cnr1,Dlg4,Erbb4,Gal,Gria2,Gria3,Grik1,Grin2b,Itpka,Kcnab1,Kcnj10,Lmx1a,Lmx1b,Lrfn2,Mas1,Nbea,Ncf1,Nell2,Nrg1,Nrgn,Pde4b,Ptn,Ptprd,Ptprz1,Rin1,Shank2,Slc6a3,Slc8a2,Syngap1,Tsc2,Tyrobp,Wasf1
Mouse Phenotype	MP:0003107	abnormal response to novelty	159	1.5598e-17	1.47401e-13	9.27051e-16	1.41113	456.371	644	0.0395263	0.0557769	223	1.96281e-09	1.85486e-05	8.31774e-08	1.44558	112.066	162	293	0.021182	0.552901	unnamed,unnamed,unnamed,unnamed,unnamed,unnamed,unnamed,unnamed,unnamed,unnamed,unnamed,unnamed,unnamed,unnamed,unnamed,unnamed,unnamed,unnamed,unnamed,unnamed,unnamed,unnamed,unnamed,unnamed,unnamed,unnamed,unnamed,unnamed,unnamed,unnamed,unnamed,unnamed,unnamed,unnamed,unnamed,unnamed,unnamed,unnamed,unnamed,unnamed,unnamed,unnamed,unnamed,unnamed,unnamed,unnamed,unnamed,unnamed,unnamed,unnamed…	9930012K11Rik,Aaas,Abca13,Abl2,Adcyap1,Aldob,Apba2,App,Arhgap32,Arhgef6,Arhgef9,Arsg,Atg7,Atp1a1,Atp1a3,Atxn1,Bcl7a,Bdnf,Brinp1,Btbd16,Cadps2,Car7,Cdh23,Cers1,Cers6,Chl1,Chrna4,Chrnb2,Ckap5,Ckb,Clcn3,Cnr1,Cntnap2,Cplx2,Ctnnb1,Cxadr,Cyb561,Dact2,Dbx1,Disc1,Dmxl2,Dnmt3a,Drd4,Dst,Dtnbp1,Dync1li1,Dyrk1a,Efna3,Elfn1,Eml2,Emx1,Eno2,Erc2,Esr2,Fgf12,Fosb,Frmd4b,Gabbr1,Gdpd5,Gnal,Gria1,Gria2,Grid2,Grin1,G…
Mouse Phenotype	MP:0000774	decreased brain size	160	1.92392e-17	1.8181e-13	1.13631e-15	1.45145	383.065	556	0.0331772	0.0481552	347	1.7672e-07	0.00167	4.81269e-06	1.38897	110.153	153	288	0.0200052	0.53125	unnamed,unnamed,unnamed,unnamed,unnamed,unnamed,unnamed,unnamed,unnamed,unnamed,unnamed,unnamed,unnamed,unnamed,unnamed,unnamed,unnamed,unnamed,unnamed,unnamed,unnamed,unnamed,unnamed,unnamed,unnamed,unnamed,unnamed,unnamed,unnamed,unnamed,unnamed,unnamed,unnamed,unnamed,unnamed,unnamed,unnamed,unnamed,unnamed,unnamed,unnamed,unnamed,unnamed,unnamed,unnamed,unnamed,unnamed,unnamed,unnamed,unnamed…	Aatk,Akap13,Akt3,App,Arhgap33,Arid1a,Ass1,Atf2,Atxn1,B4galt2,Bcl2l1,Bdnf,Bhlhe22,Brsk2,Cacna2d2,Ccdc124,Cdk5rap2,Cers1,Cit,Ckb,Clcn3,Col1a1,Cox10,Ctnnb1,Cycs,Cyp26a1,Cyp26c1,Dagla,Disc1,Dkk1,Drd1,Dst,Dync2li1,Dyrk1a,Emx1,En1,En2,Eomes,Epb41l1,Erf,Esr2,Fbxo41,Fbxo45,Fgfr2,Foxa2,Foxg1,Gad1,Gba,Gcm2,Gdf7,Gpc1,Gpt2,Grhl2,Gsc,Hhex,Id3,Id4,Igf1r,Igf2bp1,Itpr1,Itsn1,Kat6b,Kcnj10,Khdrbs1,Khdrbs2,Kidins22…
Mouse Phenotype	MP:0001752	abnormal hypothalamus secretion	161	2.30711e-17	2.18022e-13	1.35417e-15	3.18818	23.5244	75	0.00203745	0.00649576	2067	0.0122967	1	0.0562187	1.86753	5.35467	10	14	0.00130753	0.714286	unnamed,unnamed,unnamed,unnamed,unnamed,unnamed,unnamed,unnamed,unnamed,unnamed,unnamed,unnamed,unnamed,unnamed,unnamed,unnamed,unnamed,unnamed,unnamed,unnamed,unnamed,unnamed,unnamed,unnamed,unnamed,unnamed,unnamed,unnamed,unnamed,unnamed,unnamed,unnamed,unnamed,unnamed,unnamed,unnamed,unnamed,unnamed,unnamed,unnamed,unnamed,unnamed,unnamed,unnamed,unnamed,unnamed,unnamed,unnamed,unnamed,unnamed…	Alk,Cacna1b,Cpe,Dbx1,Dmxl2,Ebf2,Gsx1,Nos1,Nr3c1,Stx1a
Mouse Phenotype	MP:0013835	absent hypoglossal nerve	162	2.45845e-17	2.32323e-13	1.43409e-15	4.99718	8.80497	44	0.000762599	0.00381084	4783	0.173811	1	0.343406	1.39442	5.73715	8	15	0.00104602	0.533333	unnamed,unnamed,unnamed,unnamed,unnamed,unnamed,unnamed,unnamed,unnamed,unnamed,unnamed,unnamed,unnamed,unnamed,unnamed,unnamed,unnamed,unnamed,unnamed,unnamed,unnamed,unnamed,unnamed,unnamed,unnamed,unnamed,unnamed,unnamed,unnamed,unnamed,unnamed,unnamed,unnamed,unnamed,unnamed,unnamed,unnamed,unnamed,unnamed,unnamed,unnamed,unnamed,unnamed,unnamed	Actn4,Atg16l1,Cmip,Dbn1,H13,Nsun2,Prrc2b,Sh3pxd2a
Mouse Phenotype	MP:0008414	abnormal spatial reference memory	163	2.61523e-17	2.4714e-13	1.51619e-15	1.91894	105.267	202	0.00911716	0.0174952	1039	0.000456336	1	0.00415051	1.53797	26.0084	40	68	0.00523013	0.588235	unnamed,unnamed,unnamed,unnamed,unnamed,unnamed,unnamed,unnamed,unnamed,unnamed,unnamed,unnamed,unnamed,unnamed,unnamed,unnamed,unnamed,unnamed,unnamed,unnamed,unnamed,unnamed,unnamed,unnamed,unnamed,unnamed,unnamed,unnamed,unnamed,unnamed,unnamed,unnamed,unnamed,unnamed,unnamed,unnamed,unnamed,unnamed,unnamed,unnamed,unnamed,unnamed,unnamed,unnamed,unnamed,unnamed,unnamed,unnamed,unnamed,unnamed…	App,Asic1,Avpr1a,Brinp1,Cacna1b,Cadps2,Camk2a,Ccl3,Cpeb3,Cplx2,Ctnnb1,Emx1,Eno2,Gabbr2,Gabra1,Gabrg2,Gria1,Gria2,Grin2b,Gsk3b,Homer1,Kcnh3,Ksr1,Ldlr,Lmx1b,Lrp8,Lrrc7,Mbnl2,Nos2,Nr2e1,Psen1,Rasgrf1,Shank1,Shank3,Slc17a6,Sp4,Srgap3,Srr,Tlr3,Uhrf2
Mouse Phenotype	MP:0000184	abnormal circulating HDL cholesterol level	164	2.74271e-17	2.59186e-13	1.5804e-15	1.52577	287.724	439	0.0249198	0.0380218	375	3.45879e-07	0.00326855	8.71614e-06	1.40544	96.7665	136	253	0.0177824	0.537549	unnamed,unnamed,unnamed,unnamed,unnamed,unnamed,unnamed,unnamed,unnamed,unnamed,unnamed,unnamed,unnamed,unnamed,unnamed,unnamed,unnamed,unnamed,unnamed,unnamed,unnamed,unnamed,unnamed,unnamed,unnamed,unnamed,unnamed,unnamed,unnamed,unnamed,unnamed,unnamed,unnamed,unnamed,unnamed,unnamed,unnamed,unnamed,unnamed,unnamed,unnamed,unnamed,unnamed,unnamed,unnamed,unnamed,unnamed,unnamed,unnamed,unnamed…	Abca1,Acads,Adar,Adgrf5,Adipor2,Adora2b,Ahcyl1,Angptl3,Ankrd11,Ap2a2,Apoa1,Apoa2,Apob,Apobec1,Aqp11,Arntl,BC048403,Bscl2,Btbd9,Cacng3,Cdca8,Chn1,Cmpk2,Cpe,Ctage5,Cyp17a1,Dbn1,Dclk1,Dicer1,Dnase2b,Dnmt3a,Dntt,Eif4e3,Elk4,Elmod1,Enc1,Esr1,Esr2,Far2,Fasl,Fbf1,Fgl1,Fndc7,Foxo1,Frrs1l,Fto,Gatm,Gba,Gc,Ghrhr,Gimap6,Gpam,Gpr12,Grm3,Hif1an,Hpn,Hsd11b1,Irs1,Irs2,Itch,Kcne3,Kcnh3,Kif13b,Kif26b,Kit,Klf14,Ldh…
Mouse Phenotype	MP:0002135	abnormal kidney morphology	165	2.84879e-17	2.69211e-13	1.63158e-15	1.24376	1139.29	1417	0.098674	0.122727	131	1.37531e-12	1.29967e-08	9.92112e-11	1.29557	341.934	443	894	0.0579236	0.495526	unnamed,unnamed,unnamed,unnamed,unnamed,unnamed,unnamed,unnamed,unnamed,unnamed,unnamed,unnamed,unnamed,unnamed,unnamed,unnamed,unnamed,unnamed,unnamed,unnamed,unnamed,unnamed,unnamed,unnamed,unnamed,unnamed,unnamed,unnamed,unnamed,unnamed,unnamed,unnamed,unnamed,unnamed,unnamed,unnamed,unnamed,unnamed,unnamed,unnamed,unnamed,unnamed,unnamed,unnamed,unnamed,unnamed,unnamed,unnamed,unnamed,unnamed…	A830005F24Rik,Abca1,Acot4,Actn4,Ada,Add2,Adra1a,Aga,Agrn,Agt,Agtr1b,Akap11,Ank1,Ank3,Ankrd26,Ap3b1,Apc,Aqp11,Arid5b,Arl3,Arntl,Arsg,Atad2b,Atmin,Atp6ap2,Atp6v0a4,B4galnt1,B9d1,Bbs10,Bcl2,Bcl2l11,Bcr,Bdkrb2,Bhlhe40,Bicc1,Bmp10,Bmp4,Bmp5,Bmp7,Bmper,Boc,Bscl2,C1qa,C4b,Car2,Casp8,Cck,Cckbr,Ccni,Ccr2,Cd180,Cd40,Cd40lg,Cdc42,Cdc73,Cdh4,Cdh6,Cdkn1c,Cdkn2b,Cebpb,Cfh,Chd2,Chrm3,Chst14,Cir1,Cldn10,Clmp,Col…
Mouse Phenotype	MP:0001363	increased anxiety-related response	166	2.88289e-17	2.72433e-13	1.64116e-15	1.49312	322.815	482	0.027959	0.0417461	266	1.04808e-08	9.90433e-05	3.72343e-07	1.51643	76.4953	116	200	0.0151674	0.58	unnamed,unnamed,unnamed,unnamed,unnamed,unnamed,unnamed,unnamed,unnamed,unnamed,unnamed,unnamed,unnamed,unnamed,unnamed,unnamed,unnamed,unnamed,unnamed,unnamed,unnamed,unnamed,unnamed,unnamed,unnamed,unnamed,unnamed,unnamed,unnamed,unnamed,unnamed,unnamed,unnamed,unnamed,unnamed,unnamed,unnamed,unnamed,unnamed,unnamed,unnamed,unnamed,unnamed,unnamed,unnamed,unnamed,unnamed,unnamed,unnamed,unnamed…	Adora1,Akap11,Alk,Apba2,App,Arhgef9,Atmin,Atp1a1,B4galt5,Bdnf,Cacna1e,Cadps2,Cckbr,Cer1,Chd6,Chrna4,Cnr1,Cpeb3,Cplx2,Crhr1,Crhr2,Csf1r,Csmd1,Ctnnb1,Dao,Dcdc2a,Ddc,Disc1,Dixdc1,Dlg4,Dlgap3,Drd1,Dync1li1,Efna3,Emx1,Eno2,Esr2,Fgf13,Fosb,Foxq1,Fshr,Gabbr1,Gabbr2,Gabrd,Gabrg2,Gad2,Gbx1,Gjb6,Gpr26,Gria1,Gria2,Grin1,Grin2b,Grn,Gsk3a,Gsk3b,Gtf2i,Gtf2ird1,Hcn1,Htr4,Igf2bp1,Kcnc2,Kcnh5,Kif13a,Lrrc7,Lrrtm1,…
Mouse Phenotype	MP:0000202	abnormal circulating alkaline phosphatase level	167	3.00468e-17	2.83942e-13	1.70025e-15	1.57423	244.564	385	0.0211817	0.0333449	792	7.217e-05	0.682006	0.000861119	1.31807	92.5593	122	242	0.0159519	0.504132	unnamed,unnamed,unnamed,unnamed,unnamed,unnamed,unnamed,unnamed,unnamed,unnamed,unnamed,unnamed,unnamed,unnamed,unnamed,unnamed,unnamed,unnamed,unnamed,unnamed,unnamed,unnamed,unnamed,unnamed,unnamed,unnamed,unnamed,unnamed,unnamed,unnamed,unnamed,unnamed,unnamed,unnamed,unnamed,unnamed,unnamed,unnamed,unnamed,unnamed,unnamed,unnamed,unnamed,unnamed,unnamed,unnamed,unnamed,unnamed,unnamed,unnamed…	Abcb11,Acox1,Adar,Adora2b,Afap1l2,Aldob,Alk,Alpl,Amfr,Ank,Ap2a2,Arhgef4,Asgr1,Asxl1,Atg7,Atp6v1h,Atp8b1,B4galnt2,Bap1,Btbd9,Casp8,Cdca8,Chd9,Chn1,Col1a1,Creb3l1,Cyb5d1,Cyp17a1,Cystm1,Daam2,Dclk1,Degs1,Dpp9,Dynll1,Eif4g2,Elk4,Elmod1,Elovl6,Fam20c,Fech,Fgf23,Galnt3,Gas6,Gatm,Gmds,Gse1,Hpn,Hpse2,Insr,Iqce,Itch,Jag1,Jak1,Kctd15,Kptn,Ldha,Leprotl1,Lhx1,Lmna,Lmnb1,Map3k7,Mt1,Mta3,Mtmr3,Mtss1,Myh10,Ncal…
Mouse Phenotype	MP:0005265	abnormal blood urea nitrogen level	168	3.09991e-17	2.92941e-13	1.7437e-15	1.52216	290.377	442	0.0251496	0.0382817	721	4.00201e-05	0.37819	0.000524536	1.33508	89.882	120	235	0.0156904	0.510638	unnamed,unnamed,unnamed,unnamed,unnamed,unnamed,unnamed,unnamed,unnamed,unnamed,unnamed,unnamed,unnamed,unnamed,unnamed,unnamed,unnamed,unnamed,unnamed,unnamed,unnamed,unnamed,unnamed,unnamed,unnamed,unnamed,unnamed,unnamed,unnamed,unnamed,unnamed,unnamed,unnamed,unnamed,unnamed,unnamed,unnamed,unnamed,unnamed,unnamed,unnamed,unnamed,unnamed,unnamed,unnamed,unnamed,unnamed,unnamed,unnamed,unnamed…	Abca13,Actn4,Acvr1,Adgrf5,Ank1,Apc,App,Aqp11,Ar,Arid5b,Arl5c,Arl8b,Arntl,Atp6ap2,Atp6v0a4,Atp8a1,BC048403,Baz1a,Bcl2,Bcl2l11,Bcr,Bdkrb2,Bend3,Bicc1,Cacna1b,Car7,Cd180,Cd44,Cfh,Chd2,Cldn10,Col4a1,Col4a4,Cux1,Cys1,D7Ertd443e,Daam1,Diaph3,Dlg5,Dusp1,Edn2,Elmod1,Enc1,Fam110b,Fgf23,Gcnt2,Gimap6,Glis2,Gm13547,Gnao1,Gne,Gpsm1,Gria1,Hnrnpd,Htr4,Ifng,Ikzf3,Itgb1,Jag1,Kif3a,Lat,Lep,Ltbp1,Lypd6b,Magi2,Mt1,M…
Mouse Phenotype	MP:0003634	abnormal glial cell morphology	169	3.25633e-17	3.07723e-13	1.82085e-15	1.36929	543.347	744	0.0470593	0.0644379	117	2.80771e-13	2.65329e-09	2.26777e-11	1.45461	159.493	232	417	0.0303347	0.556355	unnamed,unnamed,unnamed,unnamed,unnamed,unnamed,unnamed,unnamed,unnamed,unnamed,unnamed,unnamed,unnamed,unnamed,unnamed,unnamed,unnamed,unnamed,unnamed,unnamed,unnamed,unnamed,unnamed,unnamed,unnamed,unnamed,unnamed,unnamed,unnamed,unnamed,unnamed,unnamed,unnamed,unnamed,unnamed,unnamed,unnamed,unnamed,unnamed,unnamed,unnamed,unnamed,unnamed,unnamed,unnamed,unnamed,unnamed,unnamed,unnamed,unnamed…	Abcd2,Abl1,Abl2,Abr,Acot7,Adam22,Adgrg1,Adgrg6,Adrb2,Aff1,Afg3l1,Aga,Aipl1,App,Arsa,Arsg,Ascl1,Atg7,Atmin,Atoh7,Atp1a3,Atrn,Avil,Bad,Basp1,Bcl2l11,Bcr,Bid,Cables1,Cacna2d2,Cadm1,Cast,Ccl2,Ccm2,Cd40lg,Cd81,Cdc42,Cdh2,Cers1,Cers6,Chst14,Clcn3,Cldn19,Cln8,Cnp,Cntn1,Cntnap2,Col4a1,Cox10,Cp,Crb2,Cryba1,Csf1,Csf1r,Ctsb,Cx3cr1,Dag1,Dmd,Dnaic1,Drd1,Dst,Dync1h1,Eef1a2,Egr2,Eml1,Emx1,Emx2,En1,Enah,Epg5,Erb…
Mouse Phenotype	MP:0013826	absent hypoglossal canal	170	3.77387e-17	3.5663e-13	2.09783e-15	7.7488	3.87157	30	0.000335317	0.0025983	2800	0.0397695	1	0.134222	1.9609	3.05981	6	8	0.000784519	0.75	unnamed,unnamed,unnamed,unnamed,unnamed,unnamed,unnamed,unnamed,unnamed,unnamed,unnamed,unnamed,unnamed,unnamed,unnamed,unnamed,unnamed,unnamed,unnamed,unnamed,unnamed,unnamed,unnamed,unnamed,unnamed,unnamed,unnamed,unnamed,unnamed,unnamed	Actn4,Dbn1,H13,Nsun2,Prrc2b,Sh3pxd2a
Mouse Phenotype	MP:0008026	abnormal brain white matter morphology	171	5.45609e-17	5.156e-13	3.01521e-15	1.43382	400.33	574	0.0346726	0.0497142	57	8.18949e-17	7.73907e-13	1.35773e-14	1.70514	87.9696	150	230	0.019613	0.652174	unnamed,unnamed,unnamed,unnamed,unnamed,unnamed,unnamed,unnamed,unnamed,unnamed,unnamed,unnamed,unnamed,unnamed,unnamed,unnamed,unnamed,unnamed,unnamed,unnamed,unnamed,unnamed,unnamed,unnamed,unnamed,unnamed,unnamed,unnamed,unnamed,unnamed,unnamed,unnamed,unnamed,unnamed,unnamed,unnamed,unnamed,unnamed,unnamed,unnamed,unnamed,unnamed,unnamed,unnamed,unnamed,unnamed,unnamed,unnamed,unnamed,unnamed…	Abi2,Abl1,Abl2,Afg3l1,Akt3,Ank2,Ap3b1,Apbb1,Apbb2,App,Arhgap5,Arsa,Atoh7,Atrn,Bhlhe22,Cables1,Cacnb3,Cd81,Cdk5r1,Celsr3,Cfap54,Chd7,Clcn2,Clip2,Cnp,Cntn2,Cntnap2,Csf1r,Ctnnb1,Dbn1,Dcc,Dclk1,Dmrta2,Ebf1,Efnb2,Egr2,Emx1,Emx2,En1,Enah,Eomes,Epha4,Ephb2,Ephb3,Evl,Ext1,Fbxo45,Fezf2,Fgfr1,Fgfr2,Foxc1,Foxg1,Fyn,Fzd3,Galc,Gap43,Gjc2,Gli3,Gpm6b,H13,Isl1,Islr2,Itpr3,Itsn1,Kcnn2,Kif1b,Kif3a,Klc1,Klf7,Ldlr,L…
Mouse Phenotype	MP:0002694	abnormal pancreas secretion	172	5.5596e-17	5.25383e-13	3.05455e-15	1.57477	240.035	378	0.0207895	0.0327386	763	6.31376e-05	0.59665	0.000781979	1.36174	73.4355	100	192	0.0130753	0.520833	unnamed,unnamed,unnamed,unnamed,unnamed,unnamed,unnamed,unnamed,unnamed,unnamed,unnamed,unnamed,unnamed,unnamed,unnamed,unnamed,unnamed,unnamed,unnamed,unnamed,unnamed,unnamed,unnamed,unnamed,unnamed,unnamed,unnamed,unnamed,unnamed,unnamed,unnamed,unnamed,unnamed,unnamed,unnamed,unnamed,unnamed,unnamed,unnamed,unnamed,unnamed,unnamed,unnamed,unnamed,unnamed,unnamed,unnamed,unnamed,unnamed,unnamed…	Abcc8,Adrb2,Akap5,Alb,Aldh1b1,Ank2,Anxa7,Arfgef3,Arntl,Atxn2,Bad,Bhlha15,C1qtnf9,Cacna1d,Cacna1e,Cadps,Cadps2,Cartpt,Ccdc80,Cdkal1,Cebpb,Chgb,Chrm3,Clec16a,Col1a1,Dpp4,E2f1,Esr2,Extl3,Fem1b,Ffar2,Ffar3,Foxa2,Foxo1,Foxo3,Gadd45gip1,Gal,Gipr,Glis3,Glp1r,Gnao1,Gper1,Gpr68,Grb10,Hipk3,Hmga1,Il6ra,Insr,Irs1,Irs2,Itpr1,Itpr2,Itpr3,Kcnb1,Kl,Lep,Lpin1,Madd,Mafa,Mapk8,Mapk9,Nampt,Nkx2-2,Nkx6-1,Nr2f2,Opa1,…
Mouse Phenotype	MP:0000186	decreased circulating HDL cholesterol level	173	7.2063e-17	6.80995e-13	3.93639e-15	1.67712	177.089	297	0.0153377	0.0257232	612	1.45274e-05	0.137284	0.00022432	1.44488	58.1364	84	152	0.0109833	0.552632	unnamed,unnamed,unnamed,unnamed,unnamed,unnamed,unnamed,unnamed,unnamed,unnamed,unnamed,unnamed,unnamed,unnamed,unnamed,unnamed,unnamed,unnamed,unnamed,unnamed,unnamed,unnamed,unnamed,unnamed,unnamed,unnamed,unnamed,unnamed,unnamed,unnamed,unnamed,unnamed,unnamed,unnamed,unnamed,unnamed,unnamed,unnamed,unnamed,unnamed,unnamed,unnamed,unnamed,unnamed,unnamed,unnamed,unnamed,unnamed,unnamed,unnamed…	Abca1,Acads,Adgrf5,Adipor2,Ahcyl1,Angptl3,Apoa1,Apoa2,Apob,Apobec1,Arntl,BC048403,Chn1,Ctage5,Dbn1,Dclk1,Dnmt3a,Eif4e3,Elk4,Elmod1,Enc1,Far2,Fasl,Fgl1,Foxo1,Frrs1l,Gatm,Gba,Gc,Ghrhr,Gpam,Hif1an,Hpn,Irs1,Irs2,Itch,Kcne3,Kit,Klf14,Ldha,Ldhb,Ldlr,Lep,Lpl,Ltbp1,March9,Miga2,Nab2,Ncald,Ncoa3,Ncor1,Ndst3,Neurog3,Nfil3,Nipa1,Nsf,Nsun2,P2ry13,Pabpc4,Pcsk9,Pex2,Pex3,Pigh,Plg,Ppard,Prkab1,Prkci,Rag2,Rnf10,…
Mouse Phenotype	MP:0000937	abnormal motor neuron morphology	174	7.56682e-17	7.15065e-13	4.10957e-15	1.49985	306.697	460	0.0265631	0.0398406	104	1.04233e-13	9.85004e-10	9.47119e-12	1.69667	71.9056	122	188	0.0159519	0.648936	unnamed,unnamed,unnamed,unnamed,unnamed,unnamed,unnamed,unnamed,unnamed,unnamed,unnamed,unnamed,unnamed,unnamed,unnamed,unnamed,unnamed,unnamed,unnamed,unnamed,unnamed,unnamed,unnamed,unnamed,unnamed,unnamed,unnamed,unnamed,unnamed,unnamed,unnamed,unnamed,unnamed,unnamed,unnamed,unnamed,unnamed,unnamed,unnamed,unnamed,unnamed,unnamed,unnamed,unnamed,unnamed,unnamed,unnamed,unnamed,unnamed,unnamed…	Adarb1,Alcam,Apaf1,Ar,Atg7,Atp8a2,Bcl2,Bhlhe22,Cacna2d2,Cacnb4,Cacng2,Cdk5r1,Cdk5r2,Chn1,Chrna1,Cln8,Cntfr,Col25a1,Cp,Cpeb4,Crlf1,Ctnnb1,Dctn1,Dll1,Dnmt3a,Dync1h1,Dync2h1,Eef1a2,Egr2,Egr3,Epg5,Epha4,Erbb3,Erbb4,Etv4,Faah,Fbxo45,Fgfr1,Fig4,Fuz,Gars,Gas7,Gbx1,Gbx2,Gdap1,Gdnf,Gdpd5,Gemin2,Gfra1,Gigyf2,Gli1,Gli2,Gli3,Gria2,Grm7,Hhat,Hoxb1,Ift122,Intu,Isl1,Islr2,Kidins220,Kif5a,Kif5c,Lhx3,Lifr,Lmnb1,L…
Mouse Phenotype	MP:0005565	increased blood urea nitrogen level	175	7.81399e-17	7.38422e-13	4.21956e-15	1.59518	223.173	356	0.019329	0.0308332	656	2.339e-05	0.221035	0.000336944	1.39253	70.3757	98	184	0.0128138	0.532609	unnamed,unnamed,unnamed,unnamed,unnamed,unnamed,unnamed,unnamed,unnamed,unnamed,unnamed,unnamed,unnamed,unnamed,unnamed,unnamed,unnamed,unnamed,unnamed,unnamed,unnamed,unnamed,unnamed,unnamed,unnamed,unnamed,unnamed,unnamed,unnamed,unnamed,unnamed,unnamed,unnamed,unnamed,unnamed,unnamed,unnamed,unnamed,unnamed,unnamed,unnamed,unnamed,unnamed,unnamed,unnamed,unnamed,unnamed,unnamed,unnamed,unnamed…	Adgrf5,Ank1,Apc,App,Aqp11,Ar,Arid5b,Arl8b,Arntl,Atp6ap2,Atp6v0a4,Atp8a1,BC048403,Baz1a,Bcl2,Bcl2l11,Bcr,Bdkrb2,Bicc1,Cacna1b,Car7,Cfh,Chd2,Cldn10,Col4a1,Col4a4,Cux1,Cys1,D7Ertd443e,Daam1,Dlg5,Dusp1,Edn2,Elmod1,Fgf23,Gcnt2,Gimap6,Glis2,Gm13547,Gnao1,Gne,Gpsm1,Gria1,Hnrnpd,Htr4,Ifng,Itgb1,Jag1,Kif3a,Lat,Lep,Ltbp1,Lypd6b,Magi2,Mt1,Myl12b,Ndrg4,Nek1,Neurog3,Nos1,Nos2,Notch2,Nphp3,Nphs2,Ntrk2,Pak1,Pcm…
Mouse Phenotype	MP:0004645	decreased vertebrae number	176	1.06501e-16	1.00644e-12	5.71839e-15	1.71926	157.044	270	0.0136016	0.0233847	1692	0.00519352	1	0.0290063	1.26058	64.2561	81	168	0.010591	0.482143	unnamed,unnamed,unnamed,unnamed,unnamed,unnamed,unnamed,unnamed,unnamed,unnamed,unnamed,unnamed,unnamed,unnamed,unnamed,unnamed,unnamed,unnamed,unnamed,unnamed,unnamed,unnamed,unnamed,unnamed,unnamed,unnamed,unnamed,unnamed,unnamed,unnamed,unnamed,unnamed,unnamed,unnamed,unnamed,unnamed,unnamed,unnamed,unnamed,unnamed,unnamed,unnamed,unnamed,unnamed,unnamed,unnamed,unnamed,unnamed,unnamed,unnamed…	Actl10,Aff3,Ap2a2,Arl4d,Arl8b,Asxl1,Atp5b,Bmp7,Brd7,Btbd9,Ccdc33,Cdk14,Chd7,Cir1,Cmip,Cnot4,Coa5,Col4a3bp,Dact1,Dbn1,Dcbld2,Dctn1,Dll1,Dusp4,Efna1,Elmo1,Entpd1,Fam212b,Fgfr1,Frmd5,Fst,Glt8d2,Gsk3a,Hibadh,Hmga1,Hoxd11,Ift140,Il20ra,Kat6a,Lasp1,Lfng,Lypd6b,Map3k10,Mfng,Mllt3,Mstn,Mta1,Mybphl,Nacad,Ndc1,Nmur1,Nr1d1,Nxn,Panx2,Pex3,Pfkfb4,Polr1e,Prrg2,Prrt2,Psip1,Rab15,Rpl38,Sfrp1,Sfrp2,Sh3gl2,Sp5,Stx…
Mouse Phenotype	MP:0004994	abnormal brain wave pattern	177	1.20269e-16	1.13654e-12	6.42115e-15	1.87612	109.801	206	0.00950988	0.0178417	193	2.91366e-10	2.75341e-06	1.42663e-08	1.94324	28.3033	55	74	0.00719142	0.743243	unnamed,unnamed,unnamed,unnamed,unnamed,unnamed,unnamed,unnamed,unnamed,unnamed,unnamed,unnamed,unnamed,unnamed,unnamed,unnamed,unnamed,unnamed,unnamed,unnamed,unnamed,unnamed,unnamed,unnamed,unnamed,unnamed,unnamed,unnamed,unnamed,unnamed,unnamed,unnamed,unnamed,unnamed,unnamed,unnamed,unnamed,unnamed,unnamed,unnamed,unnamed,unnamed,unnamed,unnamed,unnamed,unnamed,unnamed,unnamed,unnamed,unnamed…	Ank3,Bid,Bsn,Cacna1a,Cacna2d2,Cacnb4,Cacng2,Chrm2,Chrm3,Chrm4,Chrna4,Cntnap2,Dnm1,Drd1,Elavl3,Elfn1,Emx1,Foxo6,Gabbr2,Gabrg2,Gad1,Gng3,Gng7,Grik4,Grin1,Hlf,Kcna1,Kcna2,Kcnc2,Kcnq2,Kdm1a,Lgi1,Neurod1,Nos1,Nos2,Npas2,Pcmt1,Per1,Per2,Per3,Rai1,Ryr2,S1pr2,Scn1a,Scn1b,Senp2,Sik3,Slc1a2,Slc2a3,Syn1,Syn2,Syn3,Tnfrsf1a,Tsc1,Ube3a
Mouse Phenotype	MP:0002145	abnormal T cell differentiation	178	1.23146e-16	1.16373e-12	6.53778e-15	1.38062	496.154	685	0.0429719	0.0593279	690	2.98796e-05	0.282362	0.000409221	1.24937	164.082	205	429	0.0268044	0.477855	unnamed,unnamed,unnamed,unnamed,unnamed,unnamed,unnamed,unnamed,unnamed,unnamed,unnamed,unnamed,unnamed,unnamed,unnamed,unnamed,unnamed,unnamed,unnamed,unnamed,unnamed,unnamed,unnamed,unnamed,unnamed,unnamed,unnamed,unnamed,unnamed,unnamed,unnamed,unnamed,unnamed,unnamed,unnamed,unnamed,unnamed,unnamed,unnamed,unnamed,unnamed,unnamed,unnamed,unnamed,unnamed,unnamed,unnamed,unnamed,unnamed,unnamed…	Ada,Adam10,Aff1,Akt3,Apc,Arid5b,Asxl1,B9d2,Bad,Batf,Bcl11a,Bcl11b,Bcl2,Bcl2l1,Bcl2l11,Bhlhe40,C3ar1,Cacnb4,Cadm1,Cblb,Cbx4,Ccnd3,Cd180,Cd28,Cd40lg,Cd5,Cd74,Cd83,Cdkn2a,Chd4,Chek2,Cish,Col10a1,Crebbp,Ctcf,Ctla4,Cux1,Cxcr4,Cyld,Dck,Dgkz,Dicer1,Dnase2a,Dock2,Drosha,Dyrk1a,E2f1,E2f6,Efnb2,Elk4,Eomes,Esr1,Esr2,Fasl,Fbxw7,Fcer1g,Fos,Foxo1,Fyn,Gadd45b,Gadd45g,Gata3,Gba,Gimap5,Git2,Gpr15,Grap2,Grb2,Havcr…
Mouse Phenotype	MP:0000794	abnormal parietal lobe morphology	179	1.24482e-16	1.17636e-12	6.57182e-15	1.94266	96.2597	187	0.00833706	0.0161961	507	3.01959e-06	0.0285351	5.62823e-05	1.92978	16.064	31	42	0.00405335	0.738095	unnamed,unnamed,unnamed,unnamed,unnamed,unnamed,unnamed,unnamed,unnamed,unnamed,unnamed,unnamed,unnamed,unnamed,unnamed,unnamed,unnamed,unnamed,unnamed,unnamed,unnamed,unnamed,unnamed,unnamed,unnamed,unnamed,unnamed,unnamed,unnamed,unnamed,unnamed,unnamed,unnamed,unnamed,unnamed,unnamed,unnamed,unnamed,unnamed,unnamed,unnamed,unnamed,unnamed,unnamed,unnamed,unnamed,unnamed,unnamed,unnamed,unnamed…	Adcy1,Apbb1,Apbb2,Arhgap33,Bdnf,Bhlhe22,Cdc42,Chd7,Dlg3,Dyrk1a,Emx1,Epha4,Esr2,Fyn,Gap43,Grin1,Grin2b,Lef1,Lmo4,Map1b,Mapk8ip3,Mapt,Neurod6,Nf1,Nr2f1,Ntrk2,Plxna4,Rac1,Rims1,Tuba1a,Wdfy3
Mouse Phenotype	MP:0001361	social withdrawal	180	1.33331e-16	1.25998e-12	6.99987e-15	2.78313	31.6191	88	0.00273853	0.00762169	1191	0.000930097	1	0.00737987	1.9609	7.64953	15	20	0.0019613	0.75	unnamed,unnamed,unnamed,unnamed,unnamed,unnamed,unnamed,unnamed,unnamed,unnamed,unnamed,unnamed,unnamed,unnamed,unnamed,unnamed,unnamed,unnamed,unnamed,unnamed,unnamed,unnamed,unnamed,unnamed,unnamed,unnamed,unnamed,unnamed,unnamed,unnamed,unnamed,unnamed,unnamed,unnamed,unnamed,unnamed,unnamed,unnamed,unnamed,unnamed,unnamed,unnamed,unnamed,unnamed,unnamed,unnamed,unnamed,unnamed,unnamed,unnamed…	Cntnap2,Efna3,Emx1,Grin1,Grin2b,Lrfn2,Map6,Mapk1,Neurod6,Nlgn2,Numb,Numbl,Ppp3r1,Shank3,Syngap1
Mouse Phenotype	MP:0006108	abnormal hindbrain development	181	1.67413e-16	1.58206e-12	8.74064e-15	1.45895	350.252	511	0.0303354	0.0442577	106	1.32272e-13	1.24997e-09	1.17922e-11	1.65259	81.085	134	212	0.0175209	0.632076	unnamed,unnamed,unnamed,unnamed,unnamed,unnamed,unnamed,unnamed,unnamed,unnamed,unnamed,unnamed,unnamed,unnamed,unnamed,unnamed,unnamed,unnamed,unnamed,unnamed,unnamed,unnamed,unnamed,unnamed,unnamed,unnamed,unnamed,unnamed,unnamed,unnamed,unnamed,unnamed,unnamed,unnamed,unnamed,unnamed,unnamed,unnamed,unnamed,unnamed,unnamed,unnamed,unnamed,unnamed,unnamed,unnamed,unnamed,unnamed,unnamed,unnamed…	Abl1,Abl2,Abr,Adam10,Apc,Ass1,Astn1,B4galt2,Bcr,Bdnf,Cacna1a,Cacna2d2,Cadps2,Ccnd1,Cdk5r1,Cdk5r2,Cend1,Cep120,Cers1,Cox4i1,Ctnna2,Ctnnb1,Cxcl12,Cxcr4,Cyp26a1,Cyp26c1,Dab1,Dag1,Dclk1,Dlc1,Dync2li1,Egr1,Egr2,En1,En2,Erbb3,Fbxo41,Fbxw7,Fgf8,Fgfr1,Fign,Fkrp,Foxc1,Gas1,Gbx2,Gja1,Gli1,Gli2,Gli3,Gpr37l1,Grid2,Gsx2,Hk2,Hoxa1,Hoxb1,Hoxb2,Id2,Id3,Inpp4a,Itgb1,Itpr1,Kcnj6,Khdrbs1,Khdrbs2,Kitl,Ldb1,Lgi1,Lhx1…
Mouse Phenotype	MP:0009142	decreased prepulse inhibition	182	1.68984e-16	1.5969e-12	8.77418e-15	1.6259	199.274	324	0.0172591	0.0280617	546	6.42486e-06	0.060715	0.0001112	1.48596	53.1642	79	139	0.0103295	0.568345	unnamed,unnamed,unnamed,unnamed,unnamed,unnamed,unnamed,unnamed,unnamed,unnamed,unnamed,unnamed,unnamed,unnamed,unnamed,unnamed,unnamed,unnamed,unnamed,unnamed,unnamed,unnamed,unnamed,unnamed,unnamed,unnamed,unnamed,unnamed,unnamed,unnamed,unnamed,unnamed,unnamed,unnamed,unnamed,unnamed,unnamed,unnamed,unnamed,unnamed,unnamed,unnamed,unnamed,unnamed,unnamed,unnamed,unnamed,unnamed,unnamed,unnamed…	Acot7,Adra2a,Anks1b,Arpc3,Arrb1,Atp1a3,Atp2a2,Atp6v1c1,Avpr1a,Bend3,C9,Cck,Chst3,Clvs1,Cpe,Ctnna2,Ctnnb1,Ctsk,Dars,Disc1,Dtnbp1,Ednra,Elmod1,Eno2,Erbb4,Fam53b,Fkbp10,Foxo3,Foxq1,Frmd5,Fzd3,Gad2,Gipc3,Grin1,Gsk3b,Hmgn3,Kalrn,Kcnq2,Lpar1,Lrfn2,Lrrc7,Mag,Map6,Marveld2,Mdk,Mta3,Ncdn,Nedd4l,Nin,Nptn,Nrcam,Ntrk2,Olig1,Otoa,Pcdh9,Plcb1,Pomk,Prep,Pten,Rnf10,Slc12a6,Slc24a5,Slc2a3,Slc6a1,Snap25,Sorbs2,Srg…
Mouse Phenotype	MP:0001588	abnormal hemoglobin	183	2.04434e-16	1.9319e-12	1.05568e-14	1.41671	415.046	588	0.0359471	0.0509267	437	9.55988e-07	0.00903408	2.0673e-05	1.298	161.788	210	423	0.0274582	0.496454	unnamed,unnamed,unnamed,unnamed,unnamed,unnamed,unnamed,unnamed,unnamed,unnamed,unnamed,unnamed,unnamed,unnamed,unnamed,unnamed,unnamed,unnamed,unnamed,unnamed,unnamed,unnamed,unnamed,unnamed,unnamed,unnamed,unnamed,unnamed,unnamed,unnamed,unnamed,unnamed,unnamed,unnamed,unnamed,unnamed,unnamed,unnamed,unnamed,unnamed,unnamed,unnamed,unnamed,unnamed,unnamed,unnamed,unnamed,unnamed,unnamed,unnamed…	1810011O10Rik,3110043O21Rik,Abca4,Abcb10,Actl6a,Adam10,Add2,Adgrf5,Ago2,Angel1,Ank1,Apbb2,Appl1,Appl2,Arhgap25,Arhgef4,Arid3a,Arpc2,Arrb1,Asxl1,Atg16l1,Atl2,Atp6v1c1,Atp8a1,B4galt1,Bcl11a,Bhlhe40,Btg2,Ccdc57,Cd47,Cd74,Cdk5rap2,Cfh,Chd2,Chn1,Chordc1,Chsy1,Col1a1,Col4a1,Col4a2,Cops4,Cp,Cpt1c,Csf1,Csf2,Cyb561,Cyb5d1,Ddrgk1,Diaph3,Disc1,Dkk3,Dlg5,Dnajc10,Dock10,Dph6,Dpy19l3,Dusp3,Egln1,Egln3,Eif2b2,E…
Mouse Phenotype	MP:0009454	impaired contextual conditioning behavior	184	2.48198e-16	2.34548e-12	1.27471e-14	1.86545	109.893	205	0.00951787	0.0177551	674	2.56548e-05	0.242438	0.0003597	1.65331	26.0084	43	68	0.00562238	0.632353	unnamed,unnamed,unnamed,unnamed,unnamed,unnamed,unnamed,unnamed,unnamed,unnamed,unnamed,unnamed,unnamed,unnamed,unnamed,unnamed,unnamed,unnamed,unnamed,unnamed,unnamed,unnamed,unnamed,unnamed,unnamed,unnamed,unnamed,unnamed,unnamed,unnamed,unnamed,unnamed,unnamed,unnamed,unnamed,unnamed,unnamed,unnamed,unnamed,unnamed,unnamed,unnamed,unnamed,unnamed,unnamed,unnamed,unnamed,unnamed,unnamed,unnamed…	Adk,Camk2a,Camk2b,Camk4,Chrm3,Ctnnb1,Drd1,Dyrk1a,Efna3,Emx1,Erbb4,Esr2,Gabbr2,Gad2,Gria2,Grin2a,Gsk3a,Gsk3b,Homer1,Hspa4,Itm2b,Itsn1,Kcnab2,Klf9,Ksr1,Lrp1,Mapk1,Mapt,Nlgn2,Nlgn3,Nrep,Nrn1,Rai1,Rasgrf1,Slc17a6,Sorbs2,Sp4,Stx1a,Tmem108,Ube3a,Uhrf2,Wwc1,Zic2
Mouse Phenotype	MP:0004091	abnormal Z lines	185	3.37138e-16	3.18596e-12	1.72214e-14	2.44408	44.1884	108	0.00382716	0.00935389	665	2.46505e-05	0.232947	0.000350296	1.84931	15.6815	29	41	0.00379184	0.707317	unnamed,unnamed,unnamed,unnamed,unnamed,unnamed,unnamed,unnamed,unnamed,unnamed,unnamed,unnamed,unnamed,unnamed,unnamed,unnamed,unnamed,unnamed,unnamed,unnamed,unnamed,unnamed,unnamed,unnamed,unnamed,unnamed,unnamed,unnamed,unnamed,unnamed,unnamed,unnamed,unnamed,unnamed,unnamed,unnamed,unnamed,unnamed,unnamed,unnamed,unnamed,unnamed,unnamed,unnamed,unnamed,unnamed,unnamed,unnamed,unnamed,unnamed…	A1cf,Acta1,Actg1,Bin1,Cacna1s,Casz1,Col13a1,Col1a1,Des,Dmpk,Dst,Epg5,Flnc,Gaa,Kalrn,Klhl40,Ldb3,Lmod3,Med30,Myl2,Myoz2,Neb,Ppp2r5c,Ryr1,Slc8a1,Srf,Stac3,Trim63,Xirp1
Mouse Phenotype	MP:0002058	neonatal lethality	186	3.38689e-16	3.20062e-12	1.72076e-14	1.195	1564.02	1869	0.13546	0.161874	6	7.80459e-31	7.37534e-27	1.22922e-27	1.46287	375.974	550	983	0.0719142	0.559512	unnamed,unnamed,unnamed,unnamed,unnamed,unnamed,unnamed,unnamed,unnamed,unnamed,unnamed,unnamed,unnamed,unnamed,unnamed,unnamed,unnamed,unnamed,unnamed,unnamed,unnamed,unnamed,unnamed,unnamed,unnamed,unnamed,unnamed,unnamed,unnamed,unnamed,unnamed,unnamed,unnamed,unnamed,unnamed,unnamed,unnamed,unnamed,unnamed,unnamed,unnamed,unnamed,unnamed,unnamed,unnamed,unnamed,unnamed,unnamed,unnamed,unnamed…	Abhd5,Abl1,Abr,Ackr3,Acvr1,Ada,Adam22,Adam9,Adamts20,Adamts9,Adamtsl2,Ago2,Agrn,Akap6,Akap8,Aldh1a1,Alk,Alox12b,Alx1,Ank1,Ank2,Ano6,Ap3b1,Apba1,Apba2,Apc,Ar,Arid1a,Arid5b,Arrb1,Ascl1,Ass1,Asxl1,Atf2,Atg16l1,Atg7,Atp1a3,Atp2a2,Atxn1,Azin1,B4galt1,Barx1,Bcl11a,Bcl11b,Bcr,Bdnf,Bicc1,Bin1,Birc6,Bmp7,Bmper,Bnc2,Brsk2,Bub1b,Cacna1a,Cadps,Cadps2,Cald1,Caprin1,Cask,Casp7,Cbx4,Ccnd1,Ccnd3,Cd44,Cdc42,Cdh2,…
Mouse Phenotype	MP:0009746	enhanced behavioral response to xenobiotic	187	5.54666e-16	5.24159e-12	2.80299e-14	1.7931	125.481	225	0.0108679	0.0194873	443	1.0714e-06	0.0101247	2.28549e-05	1.70951	29.8332	51	78	0.00666841	0.653846	unnamed,unnamed,unnamed,unnamed,unnamed,unnamed,unnamed,unnamed,unnamed,unnamed,unnamed,unnamed,unnamed,unnamed,unnamed,unnamed,unnamed,unnamed,unnamed,unnamed,unnamed,unnamed,unnamed,unnamed,unnamed,unnamed,unnamed,unnamed,unnamed,unnamed,unnamed,unnamed,unnamed,unnamed,unnamed,unnamed,unnamed,unnamed,unnamed,unnamed,unnamed,unnamed,unnamed,unnamed,unnamed,unnamed,unnamed,unnamed,unnamed,unnamed…	Adgrl3,Alk,Anks1b,Atp1a1,Atp1a3,Cacna1a,Cacna1b,Camk4,Cckbr,Chrm4,Chrna4,Clcn3,Cyfip2,Dlg4,Dlgap3,Drd4,En1,Fyn,Gabrb1,Gabrg2,Gnaz,Homer1,Homer2,Htr6,Kcnc1,Lmo4,Lmtk3,Lyst,Ncdn,Nos1,Nr4a2,Ntrk2,Oprk1,Oprm1,Pde11a,Per2,Pnoc,Pomc,Por,Ppp1r9a,Ppp1r9b,Prkaa2,Prkar2b,Prkcg,Ryr1,Scn8a,Slc6a1,Slc6a3,Slitrk5,Sod1,Unc79
Mouse Phenotype	MP:0000950	abnormal seizure response to pharmacological agent	188	5.94965e-16	5.62242e-12	2.99065e-14	1.55446	239.311	372	0.0207267	0.032219	189	1.99927e-10	1.88931e-06	9.99634e-09	1.6985	52.3993	89	137	0.011637	0.649635	unnamed,unnamed,unnamed,unnamed,unnamed,unnamed,unnamed,unnamed,unnamed,unnamed,unnamed,unnamed,unnamed,unnamed,unnamed,unnamed,unnamed,unnamed,unnamed,unnamed,unnamed,unnamed,unnamed,unnamed,unnamed,unnamed,unnamed,unnamed,unnamed,unnamed,unnamed,unnamed,unnamed,unnamed,unnamed,unnamed,unnamed,unnamed,unnamed,unnamed,unnamed,unnamed,unnamed,unnamed,unnamed,unnamed,unnamed,unnamed,unnamed,unnamed…	Adk,Akap5,Akt3,Amph,Ap3m2,Arhgap32,Bhlhe40,Bsn,Cacna1a,Cacna1g,Cacna2d2,Cdk5r1,Chrna4,Cit,Ckb,Clcn3,Cnr1,Cntn2,Ctnnb1,Elfn1,Eml1,Emx1,Faim2,Fzd9,Gabra1,Gabrd,Gabrg2,Gad2,Gal,Glra1,Gria3,Grik4,Grik5,Grin1,Grm5,Grm7,Htr4,Htr7,Impa1,Kcna1,Kcna2,Kcnc2,Kcnh3,Kcnj6,Kcnk2,Kcnq2,Kdm1a,Lgi1,Lhx6,Mapk10,Mapt,Mbnl2,Mbp,Mc2r,Mt1,Neurod2,Neurod6,Nos2,Npy,Npy2r,Nr4a3,Nrp2,Oprd1,P2rx6,Panx1,Pcmt1,Pdyn,Plaur,Plc…
Mouse Phenotype	MP:0004939	abnormal B cell morphology	189	7.79707e-16	7.36823e-12	3.89853e-14	1.28337	800.234	1027	0.0693084	0.0889486	119	3.52374e-13	3.32994e-09	2.79827e-11	1.34677	265.821	358	695	0.0468096	0.515108	unnamed,unnamed,unnamed,unnamed,unnamed,unnamed,unnamed,unnamed,unnamed,unnamed,unnamed,unnamed,unnamed,unnamed,unnamed,unnamed,unnamed,unnamed,unnamed,unnamed,unnamed,unnamed,unnamed,unnamed,unnamed,unnamed,unnamed,unnamed,unnamed,unnamed,unnamed,unnamed,unnamed,unnamed,unnamed,unnamed,unnamed,unnamed,unnamed,unnamed,unnamed,unnamed,unnamed,unnamed,unnamed,unnamed,unnamed,unnamed,unnamed,unnamed…	1700029H14Rik,2310022B05Rik,Abcg1,Abl1,Ackr3,Actl6a,Adam10,Adgrb1,Adgrg3,Adpgk,Aff1,Akap13,Alg13,Ano10,Anxa5,Anxa6,Ar,Arhgap17,Arhgap22,Arhgef1,Arhgef4,Arhgef6,Arid3a,Arid3b,Arid5b,Arntl,Arsg,Asxl1,Atg7,Atmin,Avpr1a,B4galnt2,Bach2,Bad,Bank1,Batf,Bcl11a,Bcl11b,Bcl2,Bcl2l11,Bclaf1,Birc3,Blk,Camkmt,Casp8,Cbfa2t3,Ccdc171,Ccnd3,Ccr2,Cd180,Cd22,Cd24a,Cd28,Cd37,Cd40,Cd40lg,Cd5,Cd6,Cd74,Cd81,Cd83,Cd84,Cd…
Mouse Phenotype	MP:0011285	increased circulating erythropoietin level	190	7.79989e-16	7.3709e-12	3.87942e-14	3.39625	18.2554	62	0.0015811	0.00536982	2589	0.02454	1	0.0895724	1.69176	6.5021	11	17	0.00143829	0.647059	unnamed,unnamed,unnamed,unnamed,unnamed,unnamed,unnamed,unnamed,unnamed,unnamed,unnamed,unnamed,unnamed,unnamed,unnamed,unnamed,unnamed,unnamed,unnamed,unnamed,unnamed,unnamed,unnamed,unnamed,unnamed,unnamed,unnamed,unnamed,unnamed,unnamed,unnamed,unnamed,unnamed,unnamed,unnamed,unnamed,unnamed,unnamed,unnamed,unnamed,unnamed,unnamed,unnamed,unnamed,unnamed,unnamed,unnamed,unnamed,unnamed,unnamed…	Ank1,Bcl11a,Edn2,Egln1,Epas1,Epor,Kcne2,Kras,Picalm,Prkab1,Vhl
Mouse Phenotype	MP:0005418	abnormal circulating hormone level	191	9.6928e-16	9.1597e-12	4.79565e-14	1.23147	1135.23	1398	0.0983224	0.121081	113	2.44807e-13	2.31343e-09	2.04728e-11	1.3002	353.791	460	925	0.0601464	0.497297	unnamed,unnamed,unnamed,unnamed,unnamed,unnamed,unnamed,unnamed,unnamed,unnamed,unnamed,unnamed,unnamed,unnamed,unnamed,unnamed,unnamed,unnamed,unnamed,unnamed,unnamed,unnamed,unnamed,unnamed,unnamed,unnamed,unnamed,unnamed,unnamed,unnamed,unnamed,unnamed,unnamed,unnamed,unnamed,unnamed,unnamed,unnamed,unnamed,unnamed,unnamed,unnamed,unnamed,unnamed,unnamed,unnamed,unnamed,unnamed,unnamed,unnamed…	A1cf,A430005L14Rik,Abca1,Abhd5,Acaca,Acvrl1,Adcy3,Adcyap1,Adcyap1r1,Adipor2,Adrb1,Adrb2,Adrb3,Afap1l2,Agap1,Agap2,Ago2,Agt,Akap5,Akt3,Alk,Ank1,Ank2,Ankrd11,Ankrd26,Anks1b,Anxa1,Apbb2,Apoa2,Apob,App,Appl1,Ar,Arfgef3,Arntl,Arrdc3,Atp1a1,Atp2a2,Atxn2,Avpr1a,B4galt1,Bach2,Bad,Bag3,Baiap2,Baiap2l1,Bbs10,Bcl11a,Bcl2,Bdnf,Bscl2,Bsx,C1qtnf9,Cacna1b,Cacna1d,Cacna1e,Camkk2,Cartpt,Caskin1,Caskin2,Cavin1,Ccd…
Mouse Phenotype	MP:0003997	tonic-clonic seizures	192	1.02604e-15	9.69607e-12	5.05004e-14	1.80618	119.589	216	0.0103576	0.0187078	285	2.76211e-08	0.000261019	9.15856e-07	1.81007	29.8332	54	78	0.00706067	0.692308	unnamed,unnamed,unnamed,unnamed,unnamed,unnamed,unnamed,unnamed,unnamed,unnamed,unnamed,unnamed,unnamed,unnamed,unnamed,unnamed,unnamed,unnamed,unnamed,unnamed,unnamed,unnamed,unnamed,unnamed,unnamed,unnamed,unnamed,unnamed,unnamed,unnamed,unnamed,unnamed,unnamed,unnamed,unnamed,unnamed,unnamed,unnamed,unnamed,unnamed,unnamed,unnamed,unnamed,unnamed,unnamed,unnamed,unnamed,unnamed,unnamed,unnamed…	Akt3,B4galnt1,Celf4,Clcn3,Dclk2,Dnm1,Emx1,Fosb,Gabbr1,Gabbr2,Gabra1,Gad2,Glra1,Gnaq,Gng3,Gng7,Gria2,Grik4,Grin1,Hlf,Itpr1,Kcna1,Kcnc2,Kcnj10,Kcnj6,Kcnq2,Kdm1a,Lgi1,Lhx6,Mbnl2,Mt1,Ndufs4,Neurod1,Neurod2,Nr4a3,Pacsin1,Pcmt1,Plp1,Plppr4,Pten,Rai1,Rbfox1,Ryr2,S1pr2,Scn1a,Scn1b,Slc12a5,Slc7a10,Slc9a1,St8sia1,Syn1,Syn2,Syn3,Ube3a
Mouse Phenotype	MP:0005645	abnormal hypothalamus physiology	193	1.38157e-15	1.30559e-11	6.76469e-14	2.63606	34.1418	90	0.00295703	0.00779491	1903	0.00801931	1	0.0398226	1.64619	10.3269	17	27	0.0022228	0.62963	unnamed,unnamed,unnamed,unnamed,unnamed,unnamed,unnamed,unnamed,unnamed,unnamed,unnamed,unnamed,unnamed,unnamed,unnamed,unnamed,unnamed,unnamed,unnamed,unnamed,unnamed,unnamed,unnamed,unnamed,unnamed,unnamed,unnamed,unnamed,unnamed,unnamed,unnamed,unnamed,unnamed,unnamed,unnamed,unnamed,unnamed,unnamed,unnamed,unnamed,unnamed,unnamed,unnamed,unnamed,unnamed,unnamed,unnamed,unnamed,unnamed,unnamed…	Alk,C1qtnf9,Cacna1b,Col1a1,Cpe,Dbx1,Dmxl2,Drd1,Ebf2,Fasn,Gsx1,Nf1,Nos1,Nr3c1,Otp,Prokr2,Stx1a
Mouse Phenotype	MP:0011284	abnormal circulating erythropoietin level	194	1.56979e-15	1.48346e-11	7.64668e-14	3.34278	18.5474	62	0.0016064	0.00536982	2867	0.0415836	1	0.137065	1.59777	6.88458	11	18	0.00143829	0.611111	unnamed,unnamed,unnamed,unnamed,unnamed,unnamed,unnamed,unnamed,unnamed,unnamed,unnamed,unnamed,unnamed,unnamed,unnamed,unnamed,unnamed,unnamed,unnamed,unnamed,unnamed,unnamed,unnamed,unnamed,unnamed,unnamed,unnamed,unnamed,unnamed,unnamed,unnamed,unnamed,unnamed,unnamed,unnamed,unnamed,unnamed,unnamed,unnamed,unnamed,unnamed,unnamed,unnamed,unnamed,unnamed,unnamed,unnamed,unnamed,unnamed,unnamed…	Ank1,Bcl11a,Edn2,Egln1,Epas1,Epor,Kcne2,Kras,Picalm,Prkab1,Vhl
Mouse Phenotype	MP:0003989	abnormal barrel cortex morphology	195	1.68123e-15	1.58877e-11	8.14752e-14	2.18328	59.5435	130	0.00515707	0.0112593	541	5.54992e-06	0.0524467	9.6944e-05	2.33933	7.26705	17	19	0.0022228	0.894737	unnamed,unnamed,unnamed,unnamed,unnamed,unnamed,unnamed,unnamed,unnamed,unnamed,unnamed,unnamed,unnamed,unnamed,unnamed,unnamed,unnamed,unnamed,unnamed,unnamed,unnamed,unnamed,unnamed,unnamed,unnamed,unnamed,unnamed,unnamed,unnamed,unnamed,unnamed,unnamed,unnamed,unnamed,unnamed,unnamed,unnamed,unnamed,unnamed,unnamed,unnamed,unnamed,unnamed,unnamed,unnamed,unnamed,unnamed,unnamed,unnamed,unnamed…	Adcy1,Bdnf,Bhlhe22,Dlg3,Emx1,Epha4,Gap43,Grin1,Grin2b,Lef1,Lmo4,Neurod6,Nr2f1,Ntrk2,Plxna4,Rac1,Rims1
Mouse Phenotype	MP:0000180	abnormal circulating cholesterol level	196	1.68516e-15	1.59248e-11	8.12489e-14	1.33325	585.037	780	0.0506701	0.0675559	226	2.33727e-09	2.20872e-05	9.77308e-08	1.32437	204.625	271	535	0.0354341	0.506542	unnamed,unnamed,unnamed,unnamed,unnamed,unnamed,unnamed,unnamed,unnamed,unnamed,unnamed,unnamed,unnamed,unnamed,unnamed,unnamed,unnamed,unnamed,unnamed,unnamed,unnamed,unnamed,unnamed,unnamed,unnamed,unnamed,unnamed,unnamed,unnamed,unnamed,unnamed,unnamed,unnamed,unnamed,unnamed,unnamed,unnamed,unnamed,unnamed,unnamed,unnamed,unnamed,unnamed,unnamed,unnamed,unnamed,unnamed,unnamed,unnamed,unnamed…	4930402H24Rik,Abca1,Abcg5,Abcg8,Acads,Adar,Adcyap1,Adgrf5,Adipor2,Adora2b,Ahcyl1,Alb,Angptl3,Ankrd11,Ap1m2,Ap2a2,Apc,Apoa1,Apoa2,Apob,Apobec1,Aqp11,Arntl,Atad2b,Atp6ap2,Atxn2,BC048403,Bag3,Brd7,Bscl2,Btbd9,Cacng3,Ccdc92,Ccl2,Ccr2,Cdca8,Cel,Chn1,Cmpk2,Col1a1,Cpe,Crhr2,Csf1,Ctage5,Ctss,Cx3cl1,Cxcl14,Cyb561,Cygb,Cyp17a1,Cyp8b1,Dab2,Dbi,Dbn1,Dclk1,Dhcr24,Dhx40,Dicer1,Dlk1,Dll1,Dnajc7,Dnase2b,Dnmt3a,D…
Mouse Phenotype	MP:0006335	abnormal hearing electrophysiology	197	1.6939e-15	1.60073e-11	8.12555e-14	1.35116	532.135	719	0.0460883	0.0622726	260	8.90982e-09	8.41978e-05	3.23838e-07	1.3676	149.166	204	390	0.0266736	0.523077	unnamed,unnamed,unnamed,unnamed,unnamed,unnamed,unnamed,unnamed,unnamed,unnamed,unnamed,unnamed,unnamed,unnamed,unnamed,unnamed,unnamed,unnamed,unnamed,unnamed,unnamed,unnamed,unnamed,unnamed,unnamed,unnamed,unnamed,unnamed,unnamed,unnamed,unnamed,unnamed,unnamed,unnamed,unnamed,unnamed,unnamed,unnamed,unnamed,unnamed,unnamed,unnamed,unnamed,unnamed,unnamed,unnamed,unnamed,unnamed,unnamed,unnamed…	9930012K11Rik,Aak1,Actg1,Adgrb1,Aff3,Agtpbp1,Aldob,Ankrd11,Ankrd53,Aqp4,Arsa,Arsb,Ascc2,Asic2,Atad2b,Atf6b,Atp2b2,Atp6v0a4,Atp8a2,Atp8b1,Barhl1,Blk,Bmp4,Bphl,Bsn,Cacna1d,Cacng2,Ccdc92,Cdh23,Chd7,Chrna9,Ckap4,Cldn11,Cldn14,Clec16a,Clic5,Coch,Col11a1,Col4a4,Col9a1,Colca2,Csf1,Cys1,Dfna5,Dlx1,Dmd,Dnm1,Dtnbp1,Dusp6,Ednra,Egr2,Elmod1,Emx1,Emx2,Enox1,Epb41l4b,Esr2,Esrrb,Esrrg,Fbxo11,Fbxo2,Fbxo41,Fgf8,F…
Mouse Phenotype	MP:0014195	abnormal endocrine pancreas secretion	198	1.70216e-15	1.60854e-11	8.12394e-14	1.55375	232.342	361	0.0201231	0.0312662	920	0.000210465	1	0.00216184	1.34338	69.2283	93	181	0.01216	0.513812	unnamed,unnamed,unnamed,unnamed,unnamed,unnamed,unnamed,unnamed,unnamed,unnamed,unnamed,unnamed,unnamed,unnamed,unnamed,unnamed,unnamed,unnamed,unnamed,unnamed,unnamed,unnamed,unnamed,unnamed,unnamed,unnamed,unnamed,unnamed,unnamed,unnamed,unnamed,unnamed,unnamed,unnamed,unnamed,unnamed,unnamed,unnamed,unnamed,unnamed,unnamed,unnamed,unnamed,unnamed,unnamed,unnamed,unnamed,unnamed,unnamed,unnamed…	Abcc8,Adrb2,Akap5,Alb,Aldh1b1,Ank2,Anxa7,Arfgef3,Arntl,Atxn2,Bad,C1qtnf9,Cacna1d,Cacna1e,Cadps,Cadps2,Cartpt,Ccdc80,Cdkal1,Cebpb,Chgb,Chrm3,Clec16a,Col1a1,Dpp4,E2f1,Esr2,Extl3,Fem1b,Ffar2,Ffar3,Foxa2,Foxo1,Foxo3,Gadd45gip1,Gal,Glis3,Gnao1,Gper1,Gpr68,Grb10,Hipk3,Hmga1,Il6ra,Insr,Irs1,Irs2,Itpr1,Kcnb1,Kl,Lep,Lpin1,Madd,Mafa,Mapk8,Mapk9,Nampt,Nkx2-2,Nkx6-1,Nr2f2,Opa1,Oprm1,Pbx1,Pcsk2,Pdx1,Pparg,Prk…
Mouse Phenotype	MP:0003838	abnormal milk ejection	199	1.85367e-15	1.75171e-11	8.80258e-14	3.45447	17.0793	59	0.00147924	0.00510999	2451	0.0219193	1	0.0845114	1.90148	4.20724	8	11	0.00104602	0.727273	unnamed,unnamed,unnamed,unnamed,unnamed,unnamed,unnamed,unnamed,unnamed,unnamed,unnamed,unnamed,unnamed,unnamed,unnamed,unnamed,unnamed,unnamed,unnamed,unnamed,unnamed,unnamed,unnamed,unnamed,unnamed,unnamed,unnamed,unnamed,unnamed,unnamed,unnamed,unnamed,unnamed,unnamed,unnamed,unnamed,unnamed,unnamed,unnamed,unnamed,unnamed,unnamed,unnamed,unnamed,unnamed,unnamed,unnamed,unnamed,unnamed,unnamed…	Gja1,Inhbb,Kalrn,Mkl1,Ptprf,Rb1,Stat5a,Stat5b
Mouse Phenotype	MP:0010522	calcified aorta	200	1.87087e-15	1.76797e-11	8.83986e-14	4.83801	8.26786	40	0.00071608	0.0034644	1930	0.00817849	1	0.0400449	2.61454	1.91238	5	5	0.000653766	1	unnamed,unnamed,unnamed,unnamed,unnamed,unnamed,unnamed,unnamed,unnamed,unnamed,unnamed,unnamed,unnamed,unnamed,unnamed,unnamed,unnamed,unnamed,unnamed,unnamed,unnamed,unnamed,unnamed,unnamed,unnamed,unnamed,unnamed,unnamed,unnamed,unnamed,unnamed,unnamed,unnamed,unnamed,unnamed,unnamed,unnamed,unnamed,unnamed,unnamed	Ank,Enpp1,Galnt3,Kl,Lmna
Mouse Phenotype	MP:0009434	paraparesis	201	1.94599e-15	1.83896e-11	9.14905e-14	2.5881	35.5473	92	0.00307876	0.00796813	1463	0.00266396	1	0.0172074	1.71297	11.0918	19	29	0.00248431	0.655172	unnamed,unnamed,unnamed,unnamed,unnamed,unnamed,unnamed,unnamed,unnamed,unnamed,unnamed,unnamed,unnamed,unnamed,unnamed,unnamed,unnamed,unnamed,unnamed,unnamed,unnamed,unnamed,unnamed,unnamed,unnamed,unnamed,unnamed,unnamed,unnamed,unnamed,unnamed,unnamed,unnamed,unnamed,unnamed,unnamed,unnamed,unnamed,unnamed,unnamed,unnamed,unnamed,unnamed,unnamed,unnamed,unnamed,unnamed,unnamed,unnamed,unnamed…	Agrn,Agtpbp1,Arhgap10,Cnp,Eef1a2,Galc,Gria2,Lamc1,Lyst,Mapt,Ndrg1,Plp1,Prnp,Psap,Qk,Scn8a,Slc12a6,Spg20,Sptbn4
Mouse Phenotype	MP:0000188	abnormal circulating glucose level	202	2.25791e-15	2.13372e-11	1.0563e-13	1.2603	902.166	1137	0.0781366	0.0984757	250	6.3739e-09	6.02334e-05	2.40934e-07	1.25617	303.304	381	793	0.0498169	0.480454	unnamed,unnamed,unnamed,unnamed,unnamed,unnamed,unnamed,unnamed,unnamed,unnamed,unnamed,unnamed,unnamed,unnamed,unnamed,unnamed,unnamed,unnamed,unnamed,unnamed,unnamed,unnamed,unnamed,unnamed,unnamed,unnamed,unnamed,unnamed,unnamed,unnamed,unnamed,unnamed,unnamed,unnamed,unnamed,unnamed,unnamed,unnamed,unnamed,unnamed,unnamed,unnamed,unnamed,unnamed,unnamed,unnamed,unnamed,unnamed,unnamed,unnamed…	Abcc8,Abcg1,Abhd5,Acaca,Acadm,Acads,Adar,Adcy3,Adcyap1,Adgrf5,Adipor2,Adora2b,Adra2a,Adrb2,Agap2,Ago2,Agpat4,Akt3,Alb,Aldh1b1,Ank2,Ap1m2,Apoa2,Apob,Appl1,Aqp9,Ar,Arfgef3,Arntl,Arrdc3,Asxl1,Atp5g2,Atp8a2,Atxn2,Avpi1,Bach1,Bad,Bag3,Baiap2l1,Bcl2,Bdnf,Bhlhe40,Bmp4,Brpf3,Bscl2,Bsx,Btg2,Bzw2,C1qa,Cabp1,Cacna1b,Cacna1e,Cacna2d3,Cand2,Cast,Ccdc120,Ccdc3,Ccdc57,Ccdc80,Ccl2,Cdk4,Cdkal1,Cdo1,Cebpb,Cep19,Ch…
Mouse Phenotype	MP:0003731	abnormal retinal outer nuclear layer morphology	203	2.30922e-15	2.18221e-11	1.07498e-13	1.66468	165.197	275	0.0143077	0.0238178	2003	0.00975938	1	0.046044	1.25427	56.6065	71	148	0.00928347	0.47973	unnamed,unnamed,unnamed,unnamed,unnamed,unnamed,unnamed,unnamed,unnamed,unnamed,unnamed,unnamed,unnamed,unnamed,unnamed,unnamed,unnamed,unnamed,unnamed,unnamed,unnamed,unnamed,unnamed,unnamed,unnamed,unnamed,unnamed,unnamed,unnamed,unnamed,unnamed,unnamed,unnamed,unnamed,unnamed,unnamed,unnamed,unnamed,unnamed,unnamed,unnamed,unnamed,unnamed,unnamed,unnamed,unnamed,unnamed,unnamed,unnamed,unnamed…	Abca4,Agtpbp1,Aipl1,Angpt2,Arl3,Arl6,Ascc2,Atoh7,Atp8a2,Bbs10,Cacna2d4,Cacnb2,Ccl2,Ccr2,Cd46,Clcn2,Cln8,Crb2,Cry2,Ctnna1,Cx3cr1,E2f1,Elovl4,Erc2,Fkrp,Fos,Large1,Lgr4,Lmo7,Lpcat1,Mab21l1,Map1b,Mdm1,Mef2d,Mertk,Mfrp,Mfsd2a,Naglu,Neurod1,Nos1ap,Nphp4,Nr2e1,Nr2e3,Nrl,Otx2,Pde6a,Pde6b,Pomgnt1,Prdm14,Prph2,Rb1,Rbp3,Rd3,Rho,Rp1,Rpe65,Rras2,Rs1,Rxra,Sdccag8,Sema4a,Slc24a1,Slc7a14,Spata7,Syne2,Tgfbr2,Tmem…
Mouse Phenotype	MP:0005377	hearing/vestibular/ear phenotype	204	2.51696e-15	2.37853e-11	1.16595e-13	1.2372	1058.84	1310	0.0917063	0.113459	48	2.2865e-17	2.16075e-13	4.50155e-15	1.39161	284.562	396	744	0.0517782	0.532258	unnamed,unnamed,unnamed,unnamed,unnamed,unnamed,unnamed,unnamed,unnamed,unnamed,unnamed,unnamed,unnamed,unnamed,unnamed,unnamed,unnamed,unnamed,unnamed,unnamed,unnamed,unnamed,unnamed,unnamed,unnamed,unnamed,unnamed,unnamed,unnamed,unnamed,unnamed,unnamed,unnamed,unnamed,unnamed,unnamed,unnamed,unnamed,unnamed,unnamed,unnamed,unnamed,unnamed,unnamed,unnamed,unnamed,unnamed,unnamed,unnamed,unnamed…	9930012K11Rik,Aak1,Abr,Actg1,Actn4,Acvr1,Adamts3,Adcy9,Adgrb1,Aff3,Agtpbp1,Aldob,Ank,Ankfn1,Ankrd11,Ankrd53,Ankrd6,Ap3b1,Apaf1,Apc,Aqp4,Arid1a,Arsa,Arsb,Ascc2,Asic2,Atad2b,Atf2,Atf6b,Atp2b2,Atp6v0a4,Atp8a2,Atp8b1,Barhl1,Bcl2,Bcr,Bdnf,Bhlhe22,Blk,Bmp4,Bmp5,Bmp7,Bmper,Bphl,Bsn,Cacna1d,Cacng2,Calb1,Cby1,Ccdc92,Cdh23,Cdo1,Chd7,Chrna9,Chrnb2,Ckap4,Cldn11,Cldn14,Clec16a,Clic5,Cmah,Coch,Col11a1,Col1a1,C…
Mouse Phenotype	MP:0012440	abnormal neutrophil cell number	205	2.55836e-15	2.41765e-11	1.17934e-13	1.4591	322.801	471	0.0279578	0.0407933	825	0.000105204	0.994182	0.00120507	1.25801	131.954	166	345	0.021705	0.481159	unnamed,unnamed,unnamed,unnamed,unnamed,unnamed,unnamed,unnamed,unnamed,unnamed,unnamed,unnamed,unnamed,unnamed,unnamed,unnamed,unnamed,unnamed,unnamed,unnamed,unnamed,unnamed,unnamed,unnamed,unnamed,unnamed,unnamed,unnamed,unnamed,unnamed,unnamed,unnamed,unnamed,unnamed,unnamed,unnamed,unnamed,unnamed,unnamed,unnamed,unnamed,unnamed,unnamed,unnamed,unnamed,unnamed,unnamed,unnamed,unnamed,unnamed…	1810011O10Rik,3110043O21Rik,Abca1,Abcg1,Adam10,Akna,Ank1,Ankrd27,Arhgap15,Arhgap25,Armc7,Arntl,Asxl1,B4galnt2,B4galt1,Bach2,Bag3,Bap1,Bcl6b,Bcr,C3ar1,C4b,Ccl2,Ccl3,Ccr2,Cd40,Cd47,Cdh5,Cerk,Cflar,Cftr,Chst3,Ciz1,Cmklr1,Col17a1,Col1a1,Col4a3bp,Coro1a,Csf1,Csf2,Csf3r,Ctnnb1,Ctss,Cxcl12,Diaph1,Dmd,Dot1l,Eomes,Esr2,Etv6,F3,Fancc,Fasl,Fcgr3,Foxa2,Fut4,Fzd9,G6pc3,Galnt18,Gcnt1,Gcnt4,Gimap5,Gmds,Gpr65,Gs…
Mouse Phenotype	MP:0008874	decreased physiological sensitivity to xenobiotic	206	2.59873e-15	2.4558e-11	1.19213e-13	1.45199	331.958	482	0.0287509	0.0417461	1279	0.00137111	1	0.0101306	1.22984	109.771	135	287	0.0176517	0.470383	unnamed,unnamed,unnamed,unnamed,unnamed,unnamed,unnamed,unnamed,unnamed,unnamed,unnamed,unnamed,unnamed,unnamed,unnamed,unnamed,unnamed,unnamed,unnamed,unnamed,unnamed,unnamed,unnamed,unnamed,unnamed,unnamed,unnamed,unnamed,unnamed,unnamed,unnamed,unnamed,unnamed,unnamed,unnamed,unnamed,unnamed,unnamed,unnamed,unnamed,unnamed,unnamed,unnamed,unnamed,unnamed,unnamed,unnamed,unnamed,unnamed,unnamed…	Abl1,Adora2b,Apc,Aqp4,Ar,Arhgef1,Arhgef4,Atf6,Atp1b1,Bcl2l11,Bdkrb2,Cacna1e,Cacna1g,Ccl2,Cd34,Cdkn2a,Cebpb,Ces1c,Chrm2,Chrm3,Chrna2,Csf1,Dab2ip,Dmd,Dnajc27,Drd1,Eef2k,En1,Ephx1,Epn1,Epn2,Esr1,Esr2,Fcer1g,Ffar3,Foxa2,Foxo3,Gabbr1,Gabbr2,Gabra1,Gabrg2,Gpbar1,Gpr37,Grik4,Grik5,Grin1,Grin2b,Grk2,Grm2,Hcst,Homer1,Ifng,Ift122,Il6ra,Itga3,Itgb1,Kalrn,Kcna5,Kcnk2,Kcnn2,Kdm4c,Keap1,Kif13a,Kif26a,Kit,Kras,…
Mouse Phenotype	MP:0008572	abnormal Purkinje cell dendrite morphology	207	2.68782e-15	2.53999e-11	1.22705e-13	1.84114	107.542	198	0.00931424	0.0171488	1187	0.000927927	1	0.00738745	1.48393	28.3033	42	74	0.00549163	0.567568	unnamed,unnamed,unnamed,unnamed,unnamed,unnamed,unnamed,unnamed,unnamed,unnamed,unnamed,unnamed,unnamed,unnamed,unnamed,unnamed,unnamed,unnamed,unnamed,unnamed,unnamed,unnamed,unnamed,unnamed,unnamed,unnamed,unnamed,unnamed,unnamed,unnamed,unnamed,unnamed,unnamed,unnamed,unnamed,unnamed,unnamed,unnamed,unnamed,unnamed,unnamed,unnamed,unnamed,unnamed,unnamed,unnamed,unnamed,unnamed,unnamed,unnamed…	Agtpbp1,Atxn1,Cacna1a,Cadps2,Camk4,Cend1,Cers1,Dab2ip,Dnm1,Dpysl5,En1,Gas1,Gnb5,Grid2,Itpr1,Kcnj6,Kif14,Map1a,Map1b,Mapk8ip2,Myh10,Myo5a,Nr1d1,Ntrk2,Numb,Prex1,Prmt8,Pten,Robo2,Rora,Sacs,Scyl1,Skor2,Smad2,Sptbn2,Stk38l,Sun1,Sun2,Thra,Tsc1,Txnrd1,Zfp423
Mouse Phenotype	MP:0013840	absent segment of posterior cerebral artery	208	2.82924e-15	2.67363e-11	1.2854e-13	3.55825	15.7381	56	0.00136308	0.00485017	3966	0.123738	1	0.294836	1.36411	8.79696	12	23	0.00156904	0.521739	unnamed,unnamed,unnamed,unnamed,unnamed,unnamed,unnamed,unnamed,unnamed,unnamed,unnamed,unnamed,unnamed,unnamed,unnamed,unnamed,unnamed,unnamed,unnamed,unnamed,unnamed,unnamed,unnamed,unnamed,unnamed,unnamed,unnamed,unnamed,unnamed,unnamed,unnamed,unnamed,unnamed,unnamed,unnamed,unnamed,unnamed,unnamed,unnamed,unnamed,unnamed,unnamed,unnamed,unnamed,unnamed,unnamed,unnamed,unnamed,unnamed,unnamed…	Adcy9,Atg16l1,Cmip,Cyp11a1,H13,Mfsd7c,Mybphl,Nsun2,Prrc2b,Pth1r,Sh3pxd2a,Trappc9
Mouse Phenotype	MP:0001560	abnormal circulating insulin level	209	2.90574e-15	2.74592e-11	1.31384e-13	1.32059	617.147	815	0.0534512	0.0705872	330	1.09776e-07	0.00103738	3.14359e-06	1.29443	194.68	252	509	0.0329498	0.495088	unnamed,unnamed,unnamed,unnamed,unnamed,unnamed,unnamed,unnamed,unnamed,unnamed,unnamed,unnamed,unnamed,unnamed,unnamed,unnamed,unnamed,unnamed,unnamed,unnamed,unnamed,unnamed,unnamed,unnamed,unnamed,unnamed,unnamed,unnamed,unnamed,unnamed,unnamed,unnamed,unnamed,unnamed,unnamed,unnamed,unnamed,unnamed,unnamed,unnamed,unnamed,unnamed,unnamed,unnamed,unnamed,unnamed,unnamed,unnamed,unnamed,unnamed…	A430005L14Rik,Abhd5,Acaca,Adcy3,Adcyap1,Adcyap1r1,Adipor2,Adrb2,Afap1l2,Agap1,Agap2,Ago2,Akap5,Akt3,Ank2,Ankrd26,Anks1b,Anxa1,Apbb2,Apoa2,Apob,Appl1,Ar,Arfgef3,Arntl,Arrdc3,Atxn2,Bach2,Bad,Bag3,Baiap2,Baiap2l1,Bcl2,Bdnf,Bscl2,Bsx,C1qtnf9,Cacna1b,Cacna1d,Cartpt,Caskin1,Caskin2,Cavin1,Ccdc80,Ccl2,Cdk4,Cdkal1,Cebpb,Cel,Cers6,Chn1,Chrm3,Cldn19,Cnr1,Col1a1,Col4a3bp,Cpe,Cpt1c,Crebbp,Crtc1,Crtc3,Csf2,Cx…
Mouse Phenotype	MP:0000852	small cerebellum	210	2.98495e-15	2.82077e-11	1.34323e-13	1.48625	289.319	430	0.0250579	0.0372423	269	1.23796e-08	0.000116988	4.34899e-07	1.58559	59.2839	94	155	0.0122908	0.606452	unnamed,unnamed,unnamed,unnamed,unnamed,unnamed,unnamed,unnamed,unnamed,unnamed,unnamed,unnamed,unnamed,unnamed,unnamed,unnamed,unnamed,unnamed,unnamed,unnamed,unnamed,unnamed,unnamed,unnamed,unnamed,unnamed,unnamed,unnamed,unnamed,unnamed,unnamed,unnamed,unnamed,unnamed,unnamed,unnamed,unnamed,unnamed,unnamed,unnamed,unnamed,unnamed,unnamed,unnamed,unnamed,unnamed,unnamed,unnamed,unnamed,unnamed…	Abl1,Abl2,Agtpbp1,Ank3,App,Astn1,Atp2b2,Cacna1a,Cacna2d2,Camta1,Ccnd1,Cdk5r1,Cdk5r2,Cep120,Cers1,Cit,Cntn1,Ctnna2,Ctnnb1,Dab1,Dclk1,Disc1,Dnah5,Dock3,E2f6,Ebf2,En1,En2,Epb41l1,Erbb3,Fbxo41,Fbxw7,Fgf8,Gas1,Gja1,Gli2,Gli3,Grid2,Inpp4a,Itgb1,Jam3,Kcnj6,Khdrbs1,Khdrbs2,Kif14,Ldb1,Lhx1,Lhx5,Lmx1a,Lmx1b,Lrp8,Mdm2,Mdm4,Mib1,Mthfr,Mycn,Myh10,Neurod1,Neurod2,Nrcam,Numb,Pdss2,Pex2,Plcb4,Pnkp,Pomgnt1,Prkab1…
Mouse Phenotype	MP:0001539	decreased caudal vertebrae number	211	3.08544e-15	2.91574e-11	1.38187e-13	2.03796	73.6032	150	0.00637478	0.0129915	3542	0.0787078	1	0.209991	1.22238	29.4507	36	77	0.00470711	0.467533	unnamed,unnamed,unnamed,unnamed,unnamed,unnamed,unnamed,unnamed,unnamed,unnamed,unnamed,unnamed,unnamed,unnamed,unnamed,unnamed,unnamed,unnamed,unnamed,unnamed,unnamed,unnamed,unnamed,unnamed,unnamed,unnamed,unnamed,unnamed,unnamed,unnamed,unnamed,unnamed,unnamed,unnamed,unnamed,unnamed,unnamed,unnamed,unnamed,unnamed,unnamed,unnamed,unnamed,unnamed,unnamed,unnamed,unnamed,unnamed,unnamed,unnamed…	Aff3,Atp5b,Brd7,Ccdc33,Cnot4,Coa5,Dact1,Dctn1,Dusp4,Fam212b,Fgfr1,Hmga1,Hoxd11,Il20ra,Lfng,Lypd6b,Mfng,Mta1,Ndc1,Nmur1,Nr1d1,Panx2,Pex3,Pfkfb4,Rpl38,Sh3gl2,Sp5,T,Tcf4,Trappc10,Trappc9,Wnt10a,Zbtb16,Zhx3,Zic3,Zmynd8
Mouse Phenotype	MP:0002620	abnormal monocyte morphology	212	3.0973e-15	2.92695e-11	1.38064e-13	1.53278	244.654	375	0.0211895	0.0324788	688	2.9292e-05	0.276809	0.000402339	1.32786	97.149	129	254	0.0168672	0.507874	unnamed,unnamed,unnamed,unnamed,unnamed,unnamed,unnamed,unnamed,unnamed,unnamed,unnamed,unnamed,unnamed,unnamed,unnamed,unnamed,unnamed,unnamed,unnamed,unnamed,unnamed,unnamed,unnamed,unnamed,unnamed,unnamed,unnamed,unnamed,unnamed,unnamed,unnamed,unnamed,unnamed,unnamed,unnamed,unnamed,unnamed,unnamed,unnamed,unnamed,unnamed,unnamed,unnamed,unnamed,unnamed,unnamed,unnamed,unnamed,unnamed,unnamed…	1700024P04Rik,1810011O10Rik,4930404H24Rik,Abca1,Abcg1,Actl6a,Adgrb1,Agap1,Ap3b1,Arhgap15,Arhgap22,Arhgef1,Armc7,Arntl,Asxl1,Bach2,Bap1,Bcl2l11,Bcl6b,Bcr,Bmp7,Capn11,Ccl2,Ccr2,Ccr3,Cd40,Cd74,Cdkn2b,Cflar,Ciz1,Cmah,Cog6,Col17a1,Col4a3bp,Coro1a,Csf1,Csf1r,Csf3r,Cx3cl1,Cx3cr1,Dapk2,Dcbld2,Ddrgk1,Diaph1,Dmd,Dph6,En1,Epas1,Esr2,Fam160a1,Fam92a,Fli1,Fut4,Fzd9,Galnt18,Galnt3,Gimap6,Gmds,Gpr68,Hhex,Hps1,I…
Mouse Phenotype	MP:0004750	syndromic hearing loss	213	3.99317e-15	3.77355e-11	1.77162e-13	4.14847	11.0884	46	0.000960369	0.00398406	3380	0.0742355	1	0.207552	2.09163	1.91238	4	5	0.000523013	0.8	unnamed,unnamed,unnamed,unnamed,unnamed,unnamed,unnamed,unnamed,unnamed,unnamed,unnamed,unnamed,unnamed,unnamed,unnamed,unnamed,unnamed,unnamed,unnamed,unnamed,unnamed,unnamed,unnamed,unnamed,unnamed,unnamed,unnamed,unnamed,unnamed,unnamed,unnamed,unnamed,unnamed,unnamed,unnamed,unnamed,unnamed,unnamed,unnamed,unnamed,unnamed,unnamed,unnamed,unnamed,unnamed,unnamed	Atp2b2,Emx2,Lmx1a,Marveld2
Mouse Phenotype	MP:0001406	abnormal gait	214	4.31102e-15	4.07392e-11	1.9037e-13	1.30991	648.134	849	0.056135	0.073532	216	1.10927e-09	1.04826e-05	4.85303e-08	1.36669	168.29	230	440	0.0300732	0.522727	unnamed,unnamed,unnamed,unnamed,unnamed,unnamed,unnamed,unnamed,unnamed,unnamed,unnamed,unnamed,unnamed,unnamed,unnamed,unnamed,unnamed,unnamed,unnamed,unnamed,unnamed,unnamed,unnamed,unnamed,unnamed,unnamed,unnamed,unnamed,unnamed,unnamed,unnamed,unnamed,unnamed,unnamed,unnamed,unnamed,unnamed,unnamed,unnamed,unnamed,unnamed,unnamed,unnamed,unnamed,unnamed,unnamed,unnamed,unnamed,unnamed,unnamed…	Aga,Ank,Ank3,Apc2,Arntl,Arsa,Arsb,Ass1,Atg7,Atl1,Atn1,Atp1a3,Atp2b2,Atp8a2,Atrn,Atxn1,Babam2,Bahcc1,Cacna1a,Cacna1b,Cacna2d2,Cacnb4,Cacng2,Cast,Cbln1,Cdh23,Cend1,Cerk,Cftr,Chn1,Cit,Ciz1,Clcn3,Cldn19,Clstn3,Cmah,Cnp,Cntn1,Col1a1,Cp,Cpe,Cplx2,Cyb561,Dab1,Dapk1,Dcc,Dctn1,Dixdc1,Dlg5,Dmd,Dnah5,Dnm1,Dnmt3a,Dock3,Dst,Dync1li1,Ebf2,Efl1,Egr2,Egr3,Eif4e3,Elmod1,Emx1,En1,Enpp1,Epb41l3,Epha4,Ercc3,Errfi1,F…
Mouse Phenotype	MP:0005633	increased circulating sodium level	215	4.76871e-15	4.50643e-11	2.09602e-13	1.91879	90.1611	173	0.00780886	0.0149835	2009	0.00988808	1	0.0465119	1.33767	32.893	44	86	0.00575314	0.511628	unnamed,unnamed,unnamed,unnamed,unnamed,unnamed,unnamed,unnamed,unnamed,unnamed,unnamed,unnamed,unnamed,unnamed,unnamed,unnamed,unnamed,unnamed,unnamed,unnamed,unnamed,unnamed,unnamed,unnamed,unnamed,unnamed,unnamed,unnamed,unnamed,unnamed,unnamed,unnamed,unnamed,unnamed,unnamed,unnamed,unnamed,unnamed,unnamed,unnamed,unnamed,unnamed,unnamed,unnamed,unnamed,unnamed,unnamed,unnamed,unnamed,unnamed…	Ajap1,Anxa6,Bach1,Brms1,C9,Cacna1b,Cacna2d3,Camkmt,Ccdc57,Cd84,Cers5,Chek2,Chn1,Cyb5d1,Cyp2c44,D1Ertd622e,Dusp4,Entpd1,Gad2,Guca2b,Gys2,H1fx,Hsf2,Irf8,Itga8,Kcne1,Kcnj1,Kif1b,Leprotl1,Myl12b,Nacad,Ncald,Nedd4l,Pex26,Pnmt,Pola2,Rnf10,Rxfp2,Sesn3,Slc24a5,Slc5a2,Slc6a3,Slc8a3,Slco1b2
Mouse Phenotype	MP:0004703	abnormal vertebral column morphology	216	4.78303e-15	4.51996e-11	2.09257e-13	1.22987	1097.67	1350	0.0950697	0.116924	137	3.42525e-12	3.23686e-08	2.36267e-10	1.30407	312.866	408	818	0.0533473	0.498777	unnamed,unnamed,unnamed,unnamed,unnamed,unnamed,unnamed,unnamed,unnamed,unnamed,unnamed,unnamed,unnamed,unnamed,unnamed,unnamed,unnamed,unnamed,unnamed,unnamed,unnamed,unnamed,unnamed,unnamed,unnamed,unnamed,unnamed,unnamed,unnamed,unnamed,unnamed,unnamed,unnamed,unnamed,unnamed,unnamed,unnamed,unnamed,unnamed,unnamed,unnamed,unnamed,unnamed,unnamed,unnamed,unnamed,unnamed,unnamed,unnamed,unnamed…	Abca4,Acta1,Actl10,Acvr1,Adamts3,Aff3,Alpl,Ank,Ankrd11,Antxr1,Ap2a2,Apaf1,Apc,Arid5b,Arl4d,Arl8b,Arntl,Arpc1b,Asxl1,Asxl2,Atp2b1,Atp5b,Atxn1,Bdkrb2,Bmp1,Bmp4,Bmp5,Bmp7,Bmper,Boc,Brd7,Btbd9,Btg2,Bub1b,Bub3,Cacna1s,Cacna2d2,Cacnb1,Cask,Ccdc33,Cdk14,Cdk5rap2,Cdkn1c,Cdkn2a,Cdo1,Cdon,Chd2,Chd7,Chrna1,Chst11,Cir1,Clcn3,Cmip,Cnot4,Cnp,Coa5,Cog6,Col10a1,Col12a1,Col1a1,Col4a3bp,Cox10,Crebbp,Crtc3,Ctbp2,Ct…
Mouse Phenotype	MP:0000948	nonconvulsive seizures	217	4.85851e-15	4.59129e-11	2.1158e-13	1.95244	84.5098	165	0.0073194	0.0142907	341	1.50924e-07	0.00142623	4.1825e-06	2.02033	16.829	34	44	0.00444561	0.772727	unnamed,unnamed,unnamed,unnamed,unnamed,unnamed,unnamed,unnamed,unnamed,unnamed,unnamed,unnamed,unnamed,unnamed,unnamed,unnamed,unnamed,unnamed,unnamed,unnamed,unnamed,unnamed,unnamed,unnamed,unnamed,unnamed,unnamed,unnamed,unnamed,unnamed,unnamed,unnamed,unnamed,unnamed,unnamed,unnamed,unnamed,unnamed,unnamed,unnamed,unnamed,unnamed,unnamed,unnamed,unnamed,unnamed,unnamed,unnamed,unnamed,unnamed…	Adra2a,Ap3m2,Atp1a3,C1qa,Cacna1a,Cacna1g,Cacna2d2,Cacng2,Cacng4,Celf4,Elavl3,Gabbr1,Gabra1,Gabrd,Gabrg2,Gnao1,Gria3,Hdac4,Hlf,Kcnh3,Kcnmb4,Kdm1a,Lgi1,Lhx6,Mbp,Otx1,Pcnx2,Pten,Scn1a,Scn8a,Slc10a4,Slc9a1,Sox2,Ube3a
Mouse Phenotype	MP:0001463	abnormal spatial learning	218	5.40878e-15	5.11129e-11	2.34463e-13	1.40207	401.55	563	0.0347783	0.0487615	128	9.32111e-13	8.80845e-09	6.8816e-11	1.59289	91.0294	145	238	0.0189592	0.609244	unnamed,unnamed,unnamed,unnamed,unnamed,unnamed,unnamed,unnamed,unnamed,unnamed,unnamed,unnamed,unnamed,unnamed,unnamed,unnamed,unnamed,unnamed,unnamed,unnamed,unnamed,unnamed,unnamed,unnamed,unnamed,unnamed,unnamed,unnamed,unnamed,unnamed,unnamed,unnamed,unnamed,unnamed,unnamed,unnamed,unnamed,unnamed,unnamed,unnamed,unnamed,unnamed,unnamed,unnamed,unnamed,unnamed,unnamed,unnamed,unnamed,unnamed…	Adam11,Adcy1,Add2,Aff2,Aga,Akap5,Amph,Apbb1,App,Arc,Arhgef6,Arhgef9,Arsa,Arsg,Asic1,Atp1a3,Atxn1,B3gat1,B4galt2,Baiap2,Brd7,Btg1,Cacna1b,Camk2a,Camkk2,Ccl3,Cdk5r1,Chrnb2,Chst10,Ckb,Cplx2,Cpt1c,Crmp1,Ctnnb1,Ctnnd2,Dcdc2a,Deaf1,Disc1,Dlg3,Dlg4,Dlst,Drd1,Eml1,Emx1,En2,Eno2,Epha6,Esr2,Fa2h,Fgf13,Fos,Fosb,Fyn,Fzd9,Gria2,Grid2,Grin1,Grin2a,Grin2b,Grm1,Grm5,Grn,Hcn1,Hsd11b1,Htr1b,Itga3,Itga8,Itsn1,Kcnab…
Mouse Phenotype	MP:0002452	abnormal professional antigen presenting cell physiology	219	5.67406e-15	5.36198e-11	2.44839e-13	1.24554	973.07	1212	0.0842777	0.104971	263	9.68514e-09	9.15245e-05	3.48002e-07	1.22361	382.476	468	1000	0.0611925	0.468	unnamed,unnamed,unnamed,unnamed,unnamed,unnamed,unnamed,unnamed,unnamed,unnamed,unnamed,unnamed,unnamed,unnamed,unnamed,unnamed,unnamed,unnamed,unnamed,unnamed,unnamed,unnamed,unnamed,unnamed,unnamed,unnamed,unnamed,unnamed,unnamed,unnamed,unnamed,unnamed,unnamed,unnamed,unnamed,unnamed,unnamed,unnamed,unnamed,unnamed,unnamed,unnamed,unnamed,unnamed,unnamed,unnamed,unnamed,unnamed,unnamed,unnamed…	3110043O21Rik,Abca1,Abcg1,Abl1,Acod1,Ada,Adcy9,Adcyap1,Adgrg3,Adora2b,Adrb2,Aim2,Akap13,Angptl2,Anxa1,Apobec3,Aqp4,Arg1,Arhgef1,Arhgef2,Arhgef4,Arhgef6,Arid3a,Arntl,Atg16l1,Atmin,Atp6v1h,Avpr1a,B4galt1,Bach2,Bad,Bank1,Batf,Batf3,Bbx,Bcl11a,Bcl2,Bcl2l1,Bcl2l11,Bhlhe40,Birc3,Bub1b,C3ar1,Cabin1,Cacnb4,Camk2g,Casp8,Ccbe1,Ccdc171,Ccl2,Ccl3,Ccnd3,Ccr2,Cd180,Cd22,Cd28,Cd300c2,Cd37,Cd40,Cd40lg,Cd44,Cd6,C…
Mouse Phenotype	MP:0012441	abnormal monocyte cell number	220	6.25493e-15	5.91091e-11	2.68678e-13	1.53647	236.255	363	0.0204621	0.0314395	864	0.000141834	1	0.00155131	1.30193	93.7067	122	245	0.0159519	0.497959	unnamed,unnamed,unnamed,unnamed,unnamed,unnamed,unnamed,unnamed,unnamed,unnamed,unnamed,unnamed,unnamed,unnamed,unnamed,unnamed,unnamed,unnamed,unnamed,unnamed,unnamed,unnamed,unnamed,unnamed,unnamed,unnamed,unnamed,unnamed,unnamed,unnamed,unnamed,unnamed,unnamed,unnamed,unnamed,unnamed,unnamed,unnamed,unnamed,unnamed,unnamed,unnamed,unnamed,unnamed,unnamed,unnamed,unnamed,unnamed,unnamed,unnamed…	1700024P04Rik,1810011O10Rik,4930404H24Rik,Abca1,Abcg1,Actl6a,Adgrb1,Agap1,Arhgap15,Arhgap22,Arhgef1,Armc7,Arntl,Asxl1,Bach2,Bap1,Bcl2l11,Bcl6b,Bcr,Bmp7,Capn11,Ccr2,Ccr3,Cd40,Cd74,Cdkn2b,Cflar,Ciz1,Cmah,Cog6,Col17a1,Col4a3bp,Coro1a,Csf1,Csf1r,Csf3r,Cx3cl1,Cx3cr1,Dapk2,Dcbld2,Ddrgk1,Diaph1,Dmd,Dph6,En1,Epas1,Esr2,Fam160a1,Fam92a,Fli1,Fut4,Fzd9,Galnt18,Galnt3,Gimap6,Gmds,Gpr68,Ifnar1,Ifng,Ikzf3,Inpp…
Mouse Phenotype	MP:0001746	abnormal pituitary secretion	221	7.96165e-15	7.52376e-11	3.40442e-13	3.3789	17.1653	58	0.00148669	0.00502339	3354	0.0729057	1	0.205414	1.56872	5.73715	9	15	0.00117678	0.6	unnamed,unnamed,unnamed,unnamed,unnamed,unnamed,unnamed,unnamed,unnamed,unnamed,unnamed,unnamed,unnamed,unnamed,unnamed,unnamed,unnamed,unnamed,unnamed,unnamed,unnamed,unnamed,unnamed,unnamed,unnamed,unnamed,unnamed,unnamed,unnamed,unnamed,unnamed,unnamed,unnamed,unnamed,unnamed,unnamed,unnamed,unnamed,unnamed,unnamed,unnamed,unnamed,unnamed,unnamed,unnamed,unnamed,unnamed,unnamed,unnamed,unnamed…	Arnt2,Egr1,Gal,Gata2,Gsx1,Kalrn,Otx1,Rasgrf1,Slc6a3
Mouse Phenotype	MP:0008294	abnormal adrenal gland zona fasciculata morphology	222	9.37225e-15	8.85677e-11	3.98954e-13	2.68441	30.5467	82	0.00264565	0.00710203	2143	0.013694	1	0.0603867	1.74303	6.88458	12	18	0.00156904	0.666667	unnamed,unnamed,unnamed,unnamed,unnamed,unnamed,unnamed,unnamed,unnamed,unnamed,unnamed,unnamed,unnamed,unnamed,unnamed,unnamed,unnamed,unnamed,unnamed,unnamed,unnamed,unnamed,unnamed,unnamed,unnamed,unnamed,unnamed,unnamed,unnamed,unnamed,unnamed,unnamed,unnamed,unnamed,unnamed,unnamed,unnamed,unnamed,unnamed,unnamed,unnamed,unnamed,unnamed,unnamed,unnamed,unnamed,unnamed,unnamed,unnamed,unnamed…	Apoa1,B4galt1,Crhr1,Crhr2,Cyp11a1,Ldlr,Mc2r,Nr3c1,Ntrk2,Pbx1,Pomc,Prkar1a
Mouse Phenotype	MP:0000860	abnormal primary somatosensory cortex morphology	223	9.42535e-15	8.90696e-11	3.99415e-13	2.13085	61.0086	130	0.00528396	0.0112593	660	2.36992e-05	0.223957	0.000339329	2.22236	7.64953	17	20	0.0022228	0.85	unnamed,unnamed,unnamed,unnamed,unnamed,unnamed,unnamed,unnamed,unnamed,unnamed,unnamed,unnamed,unnamed,unnamed,unnamed,unnamed,unnamed,unnamed,unnamed,unnamed,unnamed,unnamed,unnamed,unnamed,unnamed,unnamed,unnamed,unnamed,unnamed,unnamed,unnamed,unnamed,unnamed,unnamed,unnamed,unnamed,unnamed,unnamed,unnamed,unnamed,unnamed,unnamed,unnamed,unnamed,unnamed,unnamed,unnamed,unnamed,unnamed,unnamed…	Adcy1,Bdnf,Bhlhe22,Dlg3,Emx1,Epha4,Gap43,Grin1,Grin2b,Lef1,Lmo4,Neurod6,Nr2f1,Ntrk2,Plxna4,Rac1,Rims1
Mouse Phenotype	MP:0002164	abnormal gland physiology	224	1.01839e-14	9.62374e-11	4.29631e-13	1.26087	858.931	1083	0.0743921	0.0937987	175	7.37419e-11	6.96861e-07	3.98206e-09	1.31107	263.144	345	688	0.0451098	0.501453	unnamed,unnamed,unnamed,unnamed,unnamed,unnamed,unnamed,unnamed,unnamed,unnamed,unnamed,unnamed,unnamed,unnamed,unnamed,unnamed,unnamed,unnamed,unnamed,unnamed,unnamed,unnamed,unnamed,unnamed,unnamed,unnamed,unnamed,unnamed,unnamed,unnamed,unnamed,unnamed,unnamed,unnamed,unnamed,unnamed,unnamed,unnamed,unnamed,unnamed,unnamed,unnamed,unnamed,unnamed,unnamed,unnamed,unnamed,unnamed,unnamed,unnamed…	Abcc8,Adrb2,Afap1,Agap2,Ago2,Ahcyl1,Akap5,Alb,Aldh1b1,Ank2,Anxa1,Anxa7,Aqp12,Ar,Arfgef3,Arnt2,Arntl,Atf6,Atxn2,B4galt1,Bad,Bcl11b,Bcl2,Bcl2l11,Bhlha15,Birc6,Bsx,C1qtnf9,Cacna1d,Cacna1e,Cacna2d2,Cacnb4,Cadm1,Cadps,Cadps2,Cartpt,Casp7,Casp8,Cbx4,Ccdc80,Cck,Ccnd1,Cd28,Cd40lg,Cdc73,Cdkal1,Cdo1,Cebpb,Celf1,Cers4,Cflar,Cftr,Chga,Chgb,Chrm1,Chrm3,Chst8,Clcn2,Clec16a,Clic4,Col1a1,Coro1a,Csf1,Csf1r,Csn2,C…
Mouse Phenotype	MP:0000955	abnormal spinal cord morphology	225	1.08146e-14	1.02198e-10	4.54213e-13	1.33516	546.749	730	0.047354	0.0632254	51	3.7503e-17	3.54403e-13	6.94908e-15	1.5841	130.042	206	340	0.0269352	0.605882	unnamed,unnamed,unnamed,unnamed,unnamed,unnamed,unnamed,unnamed,unnamed,unnamed,unnamed,unnamed,unnamed,unnamed,unnamed,unnamed,unnamed,unnamed,unnamed,unnamed,unnamed,unnamed,unnamed,unnamed,unnamed,unnamed,unnamed,unnamed,unnamed,unnamed,unnamed,unnamed,unnamed,unnamed,unnamed,unnamed,unnamed,unnamed,unnamed,unnamed,unnamed,unnamed,unnamed,unnamed,unnamed,unnamed,unnamed,unnamed,unnamed,unnamed…	3110043O21Rik,Adarb1,Afg3l1,Alcam,Apaf1,Ar,Ascl1,Atg7,Atp8a2,Atrn,Bcl11a,Bcl2,Bhlhe22,Cacna1s,Cacna2d2,Cacnb4,Cacng2,Cdc42,Cdh2,Cdk5r1,Cdk5r2,Chn1,Chrna1,Clcn2,Cln8,Cnp,Cntfr,Cntn2,Col25a1,Cp,Cpeb4,Crebbp,Crlf1,Ctnnb1,Cux2,Dag1,Dbx1,Dcc,Dctn1,Dll1,Dnmt3a,Dock3,Dync1h1,Dync2h1,Eef1a2,Egr1,Egr2,Egr3,Elfn1,En1,Enpp1,Epg5,Epha4,Erbb3,Erbb4,Etv4,Evx1,Faah,Fbxo45,Fgfr1,Fig4,Foxa2,Foxc1,Frzb,Fuz,Fzd3,Ga…
Mouse Phenotype	MP:0003795	abnormal bone structure	226	1.10853e-14	1.04756e-10	4.63521e-13	1.22513	1110.08	1360	0.0961445	0.11779	54	6.43177e-17	6.07803e-13	1.12556e-14	1.35143	339.639	459	888	0.0600157	0.516892	unnamed,unnamed,unnamed,unnamed,unnamed,unnamed,unnamed,unnamed,unnamed,unnamed,unnamed,unnamed,unnamed,unnamed,unnamed,unnamed,unnamed,unnamed,unnamed,unnamed,unnamed,unnamed,unnamed,unnamed,unnamed,unnamed,unnamed,unnamed,unnamed,unnamed,unnamed,unnamed,unnamed,unnamed,unnamed,unnamed,unnamed,unnamed,unnamed,unnamed,unnamed,unnamed,unnamed,unnamed,unnamed,unnamed,unnamed,unnamed,unnamed,unnamed…	Abca1,Abcg1,Abhd5,Adam10,Adar,Adgrd1,Adgrf5,Adrb2,Afap1l2,Agpat3,Agpat4,Ahcy,Ahcyl1,Ajap1,Aldob,Alg13,Alpl,Ank,Ank1,Ankrd11,Ankrd9,Anks1b,Ano6,Anxa1,Apc,Apobec2,Ar,Arhgef4,Arid3a,Arl4d,Arntl,Arsb,Atp2a2,Atp2b1,Atp6v0a4,Atp6v1h,Atp8b2,Atxn10,Babam2,Bach2,Bbx,Bdkrb2,Bhlhe40,Bmp1,Bmp4,Bmp5,Bmp7,Boc,Btrc,Bzw2,C3ar1,Cacna1s,Camk4,Cand2,Car7,Cartpt,Cast,Ccl2,Ccr2,Cd40,Cd40lg,Cd44,Cd47,Cd74,Cd81,Cd9,Cdh…
Mouse Phenotype	MP:0003564	abnormal insulin secretion	227	1.13301e-14	1.07069e-10	4.7167e-13	1.53756	230.885	355	0.019997	0.0307466	882	0.000173364	1	0.00185747	1.35133	68.0808	92	178	0.0120293	0.516854	unnamed,unnamed,unnamed,unnamed,unnamed,unnamed,unnamed,unnamed,unnamed,unnamed,unnamed,unnamed,unnamed,unnamed,unnamed,unnamed,unnamed,unnamed,unnamed,unnamed,unnamed,unnamed,unnamed,unnamed,unnamed,unnamed,unnamed,unnamed,unnamed,unnamed,unnamed,unnamed,unnamed,unnamed,unnamed,unnamed,unnamed,unnamed,unnamed,unnamed,unnamed,unnamed,unnamed,unnamed,unnamed,unnamed,unnamed,unnamed,unnamed,unnamed…	Abcc8,Adrb2,Akap5,Alb,Aldh1b1,Ank2,Anxa7,Arfgef3,Arntl,Atxn2,Bad,C1qtnf9,Cacna1d,Cacna1e,Cadps,Cadps2,Cartpt,Ccdc80,Cdkal1,Cebpb,Chgb,Chrm3,Clec16a,Col1a1,Dpp4,E2f1,Esr2,Extl3,Fem1b,Ffar2,Ffar3,Foxa2,Foxo1,Foxo3,Gadd45gip1,Gal,Glis3,Gnao1,Gper1,Gpr68,Grb10,Hipk3,Hmga1,Il6ra,Insr,Irs1,Irs2,Itpr1,Kcnb1,Kl,Lep,Lpin1,Madd,Mafa,Mapk8,Mapk9,Nampt,Nkx2-2,Nkx6-1,Nr2f2,Opa1,Oprm1,Pbx1,Pcsk2,Pdx1,Pparg,Prk…
Mouse Phenotype	MP:0005554	decreased circulating creatinine level	228	1.15502e-14	1.0915e-10	4.78726e-13	2.22636	52.5522	117	0.00455155	0.0101334	3904	0.113702	1	0.275226	1.22012	22.9486	28	60	0.00366109	0.466667	unnamed,unnamed,unnamed,unnamed,unnamed,unnamed,unnamed,unnamed,unnamed,unnamed,unnamed,unnamed,unnamed,unnamed,unnamed,unnamed,unnamed,unnamed,unnamed,unnamed,unnamed,unnamed,unnamed,unnamed,unnamed,unnamed,unnamed,unnamed,unnamed,unnamed,unnamed,unnamed,unnamed,unnamed,unnamed,unnamed,unnamed,unnamed,unnamed,unnamed,unnamed,unnamed,unnamed,unnamed,unnamed,unnamed,unnamed,unnamed,unnamed,unnamed…	Angel1,Bach2,Bmp10,Bphl,Ccr2,Cd44,Cit,Cog2,Dusp3,Exoc3l2,Ifng,Myo10,Papln,Parp1,Pawr,Pbx3,Phykpl,Pik3r2,Rnf10,Selenok,Sh2d5,Slc34a2,Slc4a5,Smad3,St6galnac2,Syk,Ttc39b,Vhl
Mouse Phenotype	MP:0000921	demyelination	229	1.20719e-14	1.1408e-10	4.98164e-13	1.77675	118.193	210	0.0102367	0.0181881	730	4.38084e-05	0.413989	0.000567109	1.50839	39.7776	60	104	0.00784519	0.576923	unnamed,unnamed,unnamed,unnamed,unnamed,unnamed,unnamed,unnamed,unnamed,unnamed,unnamed,unnamed,unnamed,unnamed,unnamed,unnamed,unnamed,unnamed,unnamed,unnamed,unnamed,unnamed,unnamed,unnamed,unnamed,unnamed,unnamed,unnamed,unnamed,unnamed,unnamed,unnamed,unnamed,unnamed,unnamed,unnamed,unnamed,unnamed,unnamed,unnamed,unnamed,unnamed,unnamed,unnamed,unnamed,unnamed,unnamed,unnamed,unnamed,unnamed…	Adam22,Afg3l1,App,Arsa,Atp8a2,C3ar1,Ccl2,Cnp,Cp,Csf1,Csf1r,Cx3cr1,Dag1,Dst,Eef1a2,Egr2,Fa2h,Fasl,Fdft1,Fig4,Galc,Gars,Gjb1,Gjc2,Gjc3,Gpm6b,Kif14,Lamc1,Lbr,Lpin1,Mag,Mbp,Mgat5b,Mog,Ndrg1,Nrcam,Ntrk2,Pex7,Plp1,Pmp22,Prf1,Psap,Ptpre,Qk,Rag2,Rheb,S1pr1,Scn8a,Scyl1,Sept8,Sh3tc2,Slc12a6,Sox10,Stim2,Stmn1,Tenm4,Tnfrsf1a,Tspan2,Ugt8a,Vps54
Mouse Phenotype	MP:0000219	increased neutrophil cell number	230	1.31102e-14	1.23891e-10	5.38658e-13	1.54958	220.705	342	0.0191153	0.0296206	720	3.96056e-05	0.374273	0.000519824	1.34944	82.9974	112	217	0.0146444	0.516129	unnamed,unnamed,unnamed,unnamed,unnamed,unnamed,unnamed,unnamed,unnamed,unnamed,unnamed,unnamed,unnamed,unnamed,unnamed,unnamed,unnamed,unnamed,unnamed,unnamed,unnamed,unnamed,unnamed,unnamed,unnamed,unnamed,unnamed,unnamed,unnamed,unnamed,unnamed,unnamed,unnamed,unnamed,unnamed,unnamed,unnamed,unnamed,unnamed,unnamed,unnamed,unnamed,unnamed,unnamed,unnamed,unnamed,unnamed,unnamed,unnamed,unnamed…	1810011O10Rik,3110043O21Rik,Abca1,Abcg1,Adam10,Akna,Ank1,Ankrd27,Arhgap25,Arntl,B4galnt2,B4galt1,Bach2,Bap1,Bcr,C4b,Ccl2,Cdh5,Cflar,Ciz1,Cmklr1,Col17a1,Coro1a,Csf1,Csf2,Ctnnb1,Ctss,Cxcl12,Diaph1,Eomes,Esr2,Fasl,Fcgr3,Foxa2,Fut4,Fzd9,Galnt18,Gcnt1,Gcnt4,Gimap5,Gmds,Gpr65,Gsn,Hip1,Ikzf3,Inpp5d,Irf8,Itgam,Jak3,Kmt2a,Kmt2e,Kras,Ldha,Ldlr,Lgals9,Lyn,Lyst,Mef2c,Mt1,Ndfip1,Nedd4l,Neil2,Nf1,Nr4a1,Nr4a3,P…
Mouse Phenotype	MP:0001523	impaired righting response	231	1.34844e-14	1.27428e-10	5.51635e-13	1.52647	238.458	364	0.0206529	0.0315261	324	9.71148e-08	0.000917735	2.83252e-06	1.60115	49.3395	79	129	0.0103295	0.612403	unnamed,unnamed,unnamed,unnamed,unnamed,unnamed,unnamed,unnamed,unnamed,unnamed,unnamed,unnamed,unnamed,unnamed,unnamed,unnamed,unnamed,unnamed,unnamed,unnamed,unnamed,unnamed,unnamed,unnamed,unnamed,unnamed,unnamed,unnamed,unnamed,unnamed,unnamed,unnamed,unnamed,unnamed,unnamed,unnamed,unnamed,unnamed,unnamed,unnamed,unnamed,unnamed,unnamed,unnamed,unnamed,unnamed,unnamed,unnamed,unnamed,unnamed…	Aplp2,App,Arntl,Atp2a2,Atp2b2,Auts2,B4galnt1,Bdnf,Bsn,Cacna1a,Cacna1i,Cacnb4,Cacng2,Ccl2,Ccl3,Chd7,Chn1,Dab1,Drd1,Dst,En1,En2,Epha10,Foxa2,Gabrg2,Galc,Gli1,Gli2,Glra1,Gnao1,Gnb5,Grid2,Grin1,Grm1,Grm7,Hexb,Inpp4a,Itpr1,Kcne1,Kcnj10,Kcnj6,Kcnq1,Lmx1a,Map2k4,Mcoln3,Mog,Myo5a,Napa,Ndufs4,Nf2,Nr4a2,Ntrk2,Pcdh15,Pkp4,Pmp22,Postn,Pou4f1,Pparg,Prdm14,Prepl,Prkce,Prnp,Rnd3,Rora,S1pr2,S1pr3,Sall3,Scn1a,Scx…
Mouse Phenotype	MP:0002864	abnormal ocular fundus morphology	232	1.51407e-14	1.4308e-10	6.16723e-13	1.24413	954.082	1187	0.0826331	0.102806	163	3.26845e-11	3.08869e-07	1.8949e-09	1.31093	273.088	358	714	0.0468096	0.501401	unnamed,unnamed,unnamed,unnamed,unnamed,unnamed,unnamed,unnamed,unnamed,unnamed,unnamed,unnamed,unnamed,unnamed,unnamed,unnamed,unnamed,unnamed,unnamed,unnamed,unnamed,unnamed,unnamed,unnamed,unnamed,unnamed,unnamed,unnamed,unnamed,unnamed,unnamed,unnamed,unnamed,unnamed,unnamed,unnamed,unnamed,unnamed,unnamed,unnamed,unnamed,unnamed,unnamed,unnamed,unnamed,unnamed,unnamed,unnamed,unnamed,unnamed…	2900026A02Rik,Abca1,Abca4,Abcb11,Actn4,Adam9,Adgrf5,Adrb2,Agtpbp1,Ahcyl1,Aipl1,Alcam,Aldh1a1,Angpt2,Ankrd27,Anxa3,Apaf1,Apob,Arf3,Arhgap25,Arhgap33,Arhgef11,Arhgef15,Arl3,Arl6,Ascc2,Ascl1,Asic2,Atoh7,Atp5g2,Atp8a2,Barhl2,Bbs10,Bcar3,Bcl2,Best1,Bhlhe22,Bhlhe23,Bmp4,Bmp7,Bmper,Bsn,Cacna2d4,Cacnb2,Casq2,Ccl2,Ccm2,Ccnd1,Ccnd3,Ccr2,Cd46,Cd82,Cdh13,Cdh5,Cdkn1c,Cdkn2a,Cfh,Chsy1,Clcn2,Clcn3,Clic4,Cln8,Cn…
Mouse Phenotype	MP:0001325	abnormal retina morphology	233	1.80963e-14	1.7101e-10	7.33948e-13	1.24485	943.889	1175	0.0817503	0.101767	155	2.50993e-11	2.37188e-07	1.53025e-09	1.31468	270.028	355	706	0.0464174	0.502833	unnamed,unnamed,unnamed,unnamed,unnamed,unnamed,unnamed,unnamed,unnamed,unnamed,unnamed,unnamed,unnamed,unnamed,unnamed,unnamed,unnamed,unnamed,unnamed,unnamed,unnamed,unnamed,unnamed,unnamed,unnamed,unnamed,unnamed,unnamed,unnamed,unnamed,unnamed,unnamed,unnamed,unnamed,unnamed,unnamed,unnamed,unnamed,unnamed,unnamed,unnamed,unnamed,unnamed,unnamed,unnamed,unnamed,unnamed,unnamed,unnamed,unnamed…	2900026A02Rik,Abca1,Abca4,Abcb11,Actn4,Adam9,Adgrf5,Adrb2,Agtpbp1,Ahcyl1,Aipl1,Alcam,Aldh1a1,Angpt2,Ankrd27,Anxa3,Apaf1,Apob,Arf3,Arhgap25,Arhgap33,Arhgef11,Arhgef15,Arl3,Arl6,Ascc2,Ascl1,Asic2,Atoh7,Atp5g2,Atp8a2,Barhl2,Bbs10,Bcar3,Bcl2,Best1,Bhlhe22,Bhlhe23,Bmp4,Bmp7,Bmper,Bsn,Cacna2d4,Cacnb2,Casq2,Ccl2,Ccm2,Ccnd1,Ccnd3,Ccr2,Cd46,Cd82,Cdh13,Cdh5,Cdkn1c,Cdkn2a,Cfh,Chsy1,Clcn2,Clcn3,Clic4,Cln8,Cn…
Mouse Phenotype	MP:0003059	decreased insulin secretion	234	1.93211e-14	1.82584e-10	7.80275e-13	1.61311	178.537	288	0.0154631	0.0249437	861	0.000138057	1	0.00151526	1.41539	50.8694	72	133	0.00941423	0.541353	unnamed,unnamed,unnamed,unnamed,unnamed,unnamed,unnamed,unnamed,unnamed,unnamed,unnamed,unnamed,unnamed,unnamed,unnamed,unnamed,unnamed,unnamed,unnamed,unnamed,unnamed,unnamed,unnamed,unnamed,unnamed,unnamed,unnamed,unnamed,unnamed,unnamed,unnamed,unnamed,unnamed,unnamed,unnamed,unnamed,unnamed,unnamed,unnamed,unnamed,unnamed,unnamed,unnamed,unnamed,unnamed,unnamed,unnamed,unnamed,unnamed,unnamed…	Abcc8,Akap5,Alb,Aldh1b1,Ank2,Anxa7,Arntl,Bad,Cacna1d,Cacna1e,Cadps,Cadps2,Cartpt,Cdkal1,Cebpb,Chgb,Chrm3,Clec16a,Col1a1,E2f1,Esr2,Extl3,Fem1b,Foxo1,Foxo3,Gadd45gip1,Gal,Glis3,Gper1,Gpr68,Hipk3,Hmga1,Il6ra,Insr,Irs1,Itpr1,Kl,Lep,Lpin1,Madd,Mafa,Mapk8,Nampt,Nkx2-2,Nkx6-1,Nr2f2,Opa1,Pbx1,Pcsk2,Pdx1,Prkaa2,Rims2,Samd4,Senp1,Sgms1,Slc2a2,Slc30a8,Snap25,Sox4,Sox9,Spop,Sstr5,Stat5a,Stat5b,Stxbp3,Tcf7l2,…
Mouse Phenotype	MP:0008535	enlarged lateral ventricles	235	2.20874e-14	2.08725e-10	8.88193e-13	1.65129	159.27	263	0.0137944	0.0227784	1219	0.00108499	1	0.0084111	1.41621	36.7177	52	96	0.00679916	0.541667	unnamed,unnamed,unnamed,unnamed,unnamed,unnamed,unnamed,unnamed,unnamed,unnamed,unnamed,unnamed,unnamed,unnamed,unnamed,unnamed,unnamed,unnamed,unnamed,unnamed,unnamed,unnamed,unnamed,unnamed,unnamed,unnamed,unnamed,unnamed,unnamed,unnamed,unnamed,unnamed,unnamed,unnamed,unnamed,unnamed,unnamed,unnamed,unnamed,unnamed,unnamed,unnamed,unnamed,unnamed,unnamed,unnamed,unnamed,unnamed,unnamed,unnamed…	Ank2,Atxn1,B4galt2,Cables1,Cdc42,Cdon,Chl1,Clcn3,Cntn2,Csf1r,D430042O09Rik,Dclk1,Dnah5,Drd1,Emx1,Fgfr2,Fig4,Fzd3,Gja1,Hsf2,Jhy,Kif20b,Lbr,Map1b,Mkks,Mycbp2,Myh10,Nfix,Npas3,Numb,Numbl,Pdcd6ip,Pde11a,Phgdh,Pou3f3,Prickle1,Psen1,Ptbp2,Rgs4,Rnd3,Sdccag8,Slc25a12,Sox2,Spen,Tsc1,Vac14,Vegfa,Vti1a,Wasf1,Wdfy3,Zfp423,Zic2
Mouse Phenotype	MP:0010024	increased total body fat amount	236	2.41169e-14	2.27904e-10	9.65697e-13	1.5285	232.255	355	0.0201156	0.0307466	631	1.90586e-05	0.180103	0.000285425	1.41621	64.2561	91	168	0.0118985	0.541667	unnamed,unnamed,unnamed,unnamed,unnamed,unnamed,unnamed,unnamed,unnamed,unnamed,unnamed,unnamed,unnamed,unnamed,unnamed,unnamed,unnamed,unnamed,unnamed,unnamed,unnamed,unnamed,unnamed,unnamed,unnamed,unnamed,unnamed,unnamed,unnamed,unnamed,unnamed,unnamed,unnamed,unnamed,unnamed,unnamed,unnamed,unnamed,unnamed,unnamed,unnamed,unnamed,unnamed,unnamed,unnamed,unnamed,unnamed,unnamed,unnamed,unnamed…	Acot7,Adrb1,Adrb2,Adrb3,Agpat4,Alg13,Ank2,Atl2,Car7,Cartpt,Casq2,Ccdc80,Ccl25,Cep19,Cmtm5,Commd9,Coq2,Cpe,Csf2,Cyp17a1,Cystm1,Dmd,Dmxl2,Dnmt3a,Dpt,Enox1,Eomes,Esr1,Esr2,F7,Fcrls,Fto,Ghrhr,Gng13,Gpr26,Igf1r,Iqsec3,Irs2,Kptn,Ldlr,Lep,Mc3r,Mc4r,Med13,Mrap2,Myf5,Ncald,Ncoa3,Nos1,Ntrk2,Oprm1,Pam,Pkn1,Pomc,Ppara,Ppard,Ppargc1a,Ppm1l,Ppp1r3a,Ppp2r5c,Prdm14,Prdm16,Prkab2,Prkar2b,Prox1,Ptpn20,Rgs4,Rras2,S…
Mouse Phenotype	MP:0001899	absent long term depression	237	3.07197e-14	2.90301e-10	1.2249e-12	1.87648	92.194	173	0.00798493	0.0149835	455	1.24995e-06	0.011812	2.59604e-05	1.97685	15.6815	31	41	0.00405335	0.756098	unnamed,unnamed,unnamed,unnamed,unnamed,unnamed,unnamed,unnamed,unnamed,unnamed,unnamed,unnamed,unnamed,unnamed,unnamed,unnamed,unnamed,unnamed,unnamed,unnamed,unnamed,unnamed,unnamed,unnamed,unnamed,unnamed,unnamed,unnamed,unnamed,unnamed,unnamed,unnamed,unnamed,unnamed,unnamed,unnamed,unnamed,unnamed,unnamed,unnamed,unnamed,unnamed,unnamed,unnamed,unnamed,unnamed,unnamed,unnamed,unnamed,unnamed…	Adgrb3,Akap5,C1ql1,Camk2a,Cdk5r1,Cnr1,Dagla,Dpysl5,Gnaq,Gria1,Gria2,Grid2,Grin1,Grin2b,Grip1,Grip2,Iqsec1,Itpr1,Ncam1,Nlgn3,Nos1,Nr3c1,Park7,Pick1,Plat,Ppp1r9b,Prkacb,Rarb,Rgs9,Sorcs3,Spred1
Mouse Phenotype	MP:0003216	absence seizures	238	3.51232e-14	3.31914e-10	1.3946e-12	2.00589	71.7888	144	0.00621763	0.0124718	438	9.84943e-07	0.00930771	2.12505e-05	2.01118	14.9166	30	39	0.00392259	0.769231	unnamed,unnamed,unnamed,unnamed,unnamed,unnamed,unnamed,unnamed,unnamed,unnamed,unnamed,unnamed,unnamed,unnamed,unnamed,unnamed,unnamed,unnamed,unnamed,unnamed,unnamed,unnamed,unnamed,unnamed,unnamed,unnamed,unnamed,unnamed,unnamed,unnamed,unnamed,unnamed,unnamed,unnamed,unnamed,unnamed,unnamed,unnamed,unnamed,unnamed,unnamed,unnamed,unnamed,unnamed,unnamed,unnamed,unnamed,unnamed,unnamed,unnamed…	Adra2a,Atp1a3,C1qa,Cacna1a,Cacna1g,Cacna2d2,Cacng2,Cacng4,Celf4,Elavl3,Gabbr1,Gabra1,Gabrd,Gabrg2,Gnao1,Gria3,Hdac4,Hlf,Kcnh3,Kdm1a,Lgi1,Lhx6,Mbp,Pcnx2,Pten,Scn1a,Scn8a,Slc10a4,Slc9a1,Ube3a
Mouse Phenotype	MP:0001326	retinal degeneration	239	4.16817e-14	3.93892e-10	1.64808e-12	1.81389	104.196	189	0.00902443	0.0163693	2646	0.0289002	1	0.103215	1.23847	43.6023	54	114	0.00706067	0.473684	unnamed,unnamed,unnamed,unnamed,unnamed,unnamed,unnamed,unnamed,unnamed,unnamed,unnamed,unnamed,unnamed,unnamed,unnamed,unnamed,unnamed,unnamed,unnamed,unnamed,unnamed,unnamed,unnamed,unnamed,unnamed,unnamed,unnamed,unnamed,unnamed,unnamed,unnamed,unnamed,unnamed,unnamed,unnamed,unnamed,unnamed,unnamed,unnamed,unnamed,unnamed,unnamed,unnamed,unnamed,unnamed,unnamed,unnamed,unnamed,unnamed,unnamed…	Abca4,Adam9,Agtpbp1,Aipl1,Asic2,Bbs10,Ccl2,Ccr2,Cd46,Chsy1,Clcn2,Clcn3,Cln8,Cp,Crb2,Cry2,Cryba1,Cx3cr1,Gpm6b,Lpcat1,Mdm1,Mertk,Mfrp,Mfsd2a,Mitf,Mkks,Nr2e1,Nr2e3,Pde6a,Pde6b,Pdgfb,Per3,Pin1,Plp1,Pomgnt1,Prkcq,Prph2,Rd3,Rho,Rlbp1,Rock2,Rp1,Rpe65,Rras2,Sdccag8,Sema4a,Slc24a1,Slc6a6,Smoc1,Tmem218,Ttc8,Tub,Tyr,Vegfa
Mouse Phenotype	MP:0004738	abnormal auditory brainstem response	240	4.4159e-14	4.17303e-10	1.73876e-12	1.34481	495.98	667	0.0429569	0.0577689	350	1.85108e-07	0.00174927	4.9979e-06	1.33864	143.429	192	375	0.0251046	0.512	unnamed,unnamed,unnamed,unnamed,unnamed,unnamed,unnamed,unnamed,unnamed,unnamed,unnamed,unnamed,unnamed,unnamed,unnamed,unnamed,unnamed,unnamed,unnamed,unnamed,unnamed,unnamed,unnamed,unnamed,unnamed,unnamed,unnamed,unnamed,unnamed,unnamed,unnamed,unnamed,unnamed,unnamed,unnamed,unnamed,unnamed,unnamed,unnamed,unnamed,unnamed,unnamed,unnamed,unnamed,unnamed,unnamed,unnamed,unnamed,unnamed,unnamed…	9930012K11Rik,Aak1,Actg1,Adgrb1,Aff3,Agtpbp1,Aldob,Ankrd11,Ankrd53,Aqp4,Arsa,Arsb,Ascc2,Atad2b,Atf6b,Atp2b2,Atp6v0a4,Atp8a2,Atp8b1,Barhl1,Blk,Bmp4,Bphl,Bsn,Cacna1d,Cacng2,Ccdc92,Cdh23,Chd7,Chrna9,Ckap4,Cldn11,Cldn14,Clec16a,Clic5,Coch,Col11a1,Col4a4,Col9a1,Colca2,Csf1,Cys1,Dfna5,Dlx1,Dmd,Dnm1,Dtnbp1,Dusp6,Ednra,Egr2,Elmod1,Emx1,Enox1,Epb41l4b,Esr2,Esrrb,Esrrg,Fbxo2,Fbxo41,Fgf8,Fgf9,Fgfr1,Fgfr3,Fn…
Mouse Phenotype	MP:0004087	abnormal muscle fiber morphology	241	5.82956e-14	5.50894e-10	2.28587e-12	1.31456	580.423	763	0.0502705	0.0660835	167	5.07148e-11	4.79255e-07	2.86979e-09	1.3964	168.29	235	440	0.030727	0.534091	unnamed,unnamed,unnamed,unnamed,unnamed,unnamed,unnamed,unnamed,unnamed,unnamed,unnamed,unnamed,unnamed,unnamed,unnamed,unnamed,unnamed,unnamed,unnamed,unnamed,unnamed,unnamed,unnamed,unnamed,unnamed,unnamed,unnamed,unnamed,unnamed,unnamed,unnamed,unnamed,unnamed,unnamed,unnamed,unnamed,unnamed,unnamed,unnamed,unnamed,unnamed,unnamed,unnamed,unnamed,unnamed,unnamed,unnamed,unnamed,unnamed,unnamed…	A1cf,Abl1,Acadm,Ackr3,Acta1,Actc1,Actg1,Adarb1,Adra1a,Agtpbp1,Akap13,Akap6,Ank1,Ankrd1,Apobec2,App,Ar,Arhgap26,Atp2a2,Bag3,Bcl9l,Bin1,Bub1b,Cacna1h,Cacna1s,Cacnb1,Camk2d,Camkmt,Cap2,Capn3,Casq2,Casz1,Cav3,Cd47,Cdh2,Cdk4,Cdkn1c,Cebpb,Cenpf,Chd2,Col12a1,Col13a1,Col15a1,Col1a1,Col25a1,Comp,Cox10,Cox15,Csrp2,Csrp3,Ctnna3,Ctss,Cxadr,Daam1,Dag1,Des,Dicer1,Dlk1,Dmd,Dmpk,Dock1,Dock5,Dst,Dtna,Dusp1,E2f1,E…
Mouse Phenotype	MP:0010746	abnormal pre-Botzinger complex physiology	242	5.978e-14	5.64921e-10	2.33439e-12	2.97804	21.8264	65	0.00189039	0.00562965	2029	0.0109402	1	0.0509535	1.9609	4.58972	9	12	0.00117678	0.75	unnamed,unnamed,unnamed,unnamed,unnamed,unnamed,unnamed,unnamed,unnamed,unnamed,unnamed,unnamed,unnamed,unnamed,unnamed,unnamed,unnamed,unnamed,unnamed,unnamed,unnamed,unnamed,unnamed,unnamed,unnamed,unnamed,unnamed,unnamed,unnamed,unnamed,unnamed,unnamed,unnamed,unnamed,unnamed,unnamed,unnamed,unnamed,unnamed,unnamed,unnamed,unnamed,unnamed,unnamed,unnamed,unnamed,unnamed,unnamed,unnamed,unnamed…	Cplx2,Dbx1,Kdm6b,Ndufs4,Nlgn1,Nlgn2,Nlgn3,Robo3,Slc17a6
Mouse Phenotype	MP:0008515	thin retinal outer nuclear layer	243	6.17987e-14	5.83998e-10	2.40328e-12	1.77281	112.815	200	0.00977094	0.017322	2888	0.042625	1	0.139476	1.23037	39.0126	48	102	0.00627615	0.470588	unnamed,unnamed,unnamed,unnamed,unnamed,unnamed,unnamed,unnamed,unnamed,unnamed,unnamed,unnamed,unnamed,unnamed,unnamed,unnamed,unnamed,unnamed,unnamed,unnamed,unnamed,unnamed,unnamed,unnamed,unnamed,unnamed,unnamed,unnamed,unnamed,unnamed,unnamed,unnamed,unnamed,unnamed,unnamed,unnamed,unnamed,unnamed,unnamed,unnamed,unnamed,unnamed,unnamed,unnamed,unnamed,unnamed,unnamed,unnamed,unnamed,unnamed…	Abca4,Agtpbp1,Aipl1,Angpt2,Atoh7,Atp8a2,Cacnb2,Clcn2,Cln8,Crb2,Ctnna1,Cx3cr1,E2f1,Elovl4,Fkrp,Fos,Large1,Lgr4,Lpcat1,Mab21l1,Mdm1,Mef2d,Mertk,Mfrp,Naglu,Nphp4,Nr2e1,Otx2,Pde6a,Pde6b,Pomgnt1,Prph2,Rb1,Rbp3,Rd3,Rho,Rp1,Rpe65,Rras2,Sema4a,Slc24a1,Slc7a14,Spata7,Syne2,Tgfbr2,Tmem218,Tub,Vldlr
Mouse Phenotype	MP:0004643	abnormal vertebrae number	244	6.48834e-14	6.13148e-10	2.5129e-12	1.56016	201.902	315	0.0174868	0.0272822	1659	0.00457084	1	0.0260364	1.24191	76.4953	95	200	0.0124215	0.475	unnamed,unnamed,unnamed,unnamed,unnamed,unnamed,unnamed,unnamed,unnamed,unnamed,unnamed,unnamed,unnamed,unnamed,unnamed,unnamed,unnamed,unnamed,unnamed,unnamed,unnamed,unnamed,unnamed,unnamed,unnamed,unnamed,unnamed,unnamed,unnamed,unnamed,unnamed,unnamed,unnamed,unnamed,unnamed,unnamed,unnamed,unnamed,unnamed,unnamed,unnamed,unnamed,unnamed,unnamed,unnamed,unnamed,unnamed,unnamed,unnamed,unnamed…	Actl10,Aff3,Ap2a2,Arl4d,Arl8b,Asxl1,Atp2b1,Atp5b,Bmp7,Brd7,Btbd9,Ccdc33,Cdk14,Chd7,Cir1,Cmip,Cnot4,Coa5,Col4a3bp,Crtc3,Ctdspl,Dact1,Dbn1,Dcbld2,Dctn1,Dll1,Dph6,Dusp4,Efna1,Elmo1,Entpd1,Fam212b,Fgfr1,Frmd5,Fst,Glt8d2,Gpr158,Gsk3a,Hibadh,Hmga1,Hoxd11,Ift140,Il20ra,Kat14,Kat6a,Kcnc2,Kdm7a,Lasp1,Lfng,Lypd6b,Map3k10,Mfng,Mllt3,Mstn,Mta1,Mybphl,Nacad,Ndc1,Nmur1,Npr3,Nr1d1,Nxn,Panx2,Pcsk5,Pex3,Pfkfb4,Po…
Mouse Phenotype	MP:0001828	abnormal T cell activation	245	8.4993e-14	8.03184e-10	3.2783e-12	1.37019	426.218	584	0.0369148	0.0505803	535	5.11512e-06	0.0483379	9.03511e-05	1.28726	149.931	193	392	0.0252354	0.492347	unnamed,unnamed,unnamed,unnamed,unnamed,unnamed,unnamed,unnamed,unnamed,unnamed,unnamed,unnamed,unnamed,unnamed,unnamed,unnamed,unnamed,unnamed,unnamed,unnamed,unnamed,unnamed,unnamed,unnamed,unnamed,unnamed,unnamed,unnamed,unnamed,unnamed,unnamed,unnamed,unnamed,unnamed,unnamed,unnamed,unnamed,unnamed,unnamed,unnamed,unnamed,unnamed,unnamed,unnamed,unnamed,unnamed,unnamed,unnamed,unnamed,unnamed…	Abi2,Acaca,Adcyap1,Appl1,Arhgef1,Arhgef12,Arhgef6,Bcl11b,Bcl2l1,Bcl6b,Bclaf1,Bhlhe40,Birc3,Cadm1,Casp8,Cblb,Ccdc88b,Ccnd3,Ccr2,Cd276,Cd28,Cd44,Cd5,Cd74,Cd81,Cd83,Ceacam1,Chd4,Chst3,Cish,Cops8,Coro1a,Cry2,Ctla4,Dck,Dgkz,Diaph1,Dicer1,Dock8,Drosha,Dtx1,Dusp10,Dusp4,Dusp5,E2f1,Ephb6,Fasl,Fbxw7,Fcer1g,Foxo1,Foxo3,Foxp1,Fyb,Fyn,G6pc2,Gadd45a,Gadd45b,Gna12,Gna13,Grap,Hcls1,Hnrnpl,Hr,Hrh1,Icos,Id2,Ifih1…
Mouse Phenotype	MP:0009940	abnormal hippocampus pyramidal cell morphology	246	8.96925e-14	8.47594e-10	3.4455e-12	1.8521	93.4073	173	0.00809001	0.0149835	465	1.58351e-06	0.0149642	3.21811e-05	1.74303	26.3909	46	69	0.00601464	0.666667	unnamed,unnamed,unnamed,unnamed,unnamed,unnamed,unnamed,unnamed,unnamed,unnamed,unnamed,unnamed,unnamed,unnamed,unnamed,unnamed,unnamed,unnamed,unnamed,unnamed,unnamed,unnamed,unnamed,unnamed,unnamed,unnamed,unnamed,unnamed,unnamed,unnamed,unnamed,unnamed,unnamed,unnamed,unnamed,unnamed,unnamed,unnamed,unnamed,unnamed,unnamed,unnamed,unnamed,unnamed,unnamed,unnamed,unnamed,unnamed,unnamed,unnamed…	Abi2,Apc2,Arpc3,Atg7,Atp1a3,C1qa,Cacng8,Cadps,Cd81,Cdk5r1,Ckap5,Clcn3,Cpeb3,Crmp1,Csf1,Ctnna2,Ctnnd1,Dab1,Dclk2,Dlg4,Dpysl4,Efna3,Emx1,Epg5,Foxg1,Fyn,Islr2,Kalrn,Kcnj6,Klf7,Lyst,Macf1,Mapt,Ndel1,Neurod6,Nr4a3,Pten,Shank1,Slc1a2,Syn1,Syngap1,Trib2,Tsc1,Tsc2,Tuba1a,Ywhaz
Mouse Phenotype	MP:0009939	abnormal hippocampus neuron morphology	247	9.1906e-14	8.68512e-10	3.51624e-12	1.55075	205.707	319	0.0178163	0.0276286	270	1.30566e-08	0.000123385	4.5698e-07	1.658	47.0446	78	123	0.0101987	0.634146	unnamed,unnamed,unnamed,unnamed,unnamed,unnamed,unnamed,unnamed,unnamed,unnamed,unnamed,unnamed,unnamed,unnamed,unnamed,unnamed,unnamed,unnamed,unnamed,unnamed,unnamed,unnamed,unnamed,unnamed,unnamed,unnamed,unnamed,unnamed,unnamed,unnamed,unnamed,unnamed,unnamed,unnamed,unnamed,unnamed,unnamed,unnamed,unnamed,unnamed,unnamed,unnamed,unnamed,unnamed,unnamed,unnamed,unnamed,unnamed,unnamed,unnamed…	Abi2,Ank3,Apc2,Arpc3,Arsg,Atg7,Atp1a3,C1qa,Cacng2,Cacng8,Cadps,Cd81,Cdk5r1,Ckap5,Clcn3,Cox10,Cpeb3,Crmp1,Csf1,Ctnna2,Ctnnb1,Ctnnd1,Dab1,Dclk2,Dlg4,Dpysl4,Efna3,Emx1,Epg5,Foxg1,Fshr,Fyn,Gba,Gnaq,Gpt2,Gria2,Hpca,Inpp4a,Islr2,Kalrn,Kcnj6,Klf7,Lyst,Macf1,Mapt,Mkl1,Mkl2,Ndel1,Neurod1,Neurod6,Nos2,Nr4a3,Nrp2,Park2,Plcb1,Ppt1,Prkab1,Prox1,Psen1,Pten,Rbfox3,Rere,Scn1a,Shank1,Slc12a6,Slc1a2,Sox2,St8sia2,S…
Mouse Phenotype	MP:0001454	abnormal cued conditioning behavior	248	9.50204e-14	8.97943e-10	3.62074e-12	1.54682	208.169	322	0.0180295	0.0278884	209	7.31141e-10	6.90929e-06	3.30588e-08	1.73551	44.3673	77	116	0.010068	0.663793	unnamed,unnamed,unnamed,unnamed,unnamed,unnamed,unnamed,unnamed,unnamed,unnamed,unnamed,unnamed,unnamed,unnamed,unnamed,unnamed,unnamed,unnamed,unnamed,unnamed,unnamed,unnamed,unnamed,unnamed,unnamed,unnamed,unnamed,unnamed,unnamed,unnamed,unnamed,unnamed,unnamed,unnamed,unnamed,unnamed,unnamed,unnamed,unnamed,unnamed,unnamed,unnamed,unnamed,unnamed,unnamed,unnamed,unnamed,unnamed,unnamed,unnamed…	Add2,Aff2,Amph,Ankfn1,App,Arc,Atxn1,Bdnf,Btbd9,Camk2a,Camk4,Chrm3,Cnr1,Ctnna2,Ctnnd2,Dbn1,Drd1,Dtnbp1,Emx1,Eno2,Epha6,Erbb4,Esr2,Fam20c,Fez1,Fgf13,Fzd3,Gabrd,Gad2,Gng7,Grin2b,Grm5,Gsk3a,Gsk3b,Gtf2ird1,Jakmip1,Kcnn2,Kl,Ksr1,Lrp1,Lrrtm1,Mapk1,Mapt,Ncf1,Neurod6,Nlgn2,Nlgn3,Npas2,Npas3,Nrn1,Pde4b,Plat,Pomk,Prkacb,Prkcb,Ptprg,Rai1,Rap1a,Rap1b,Rin1,Slc17a6,Slc6a1,Slc6a9,Sp4,Spen,Spire1,St8sia2,Stx1a,Sy…
Mouse Phenotype	MP:0011997	abnormal retinal outer nuclear layer thickness	249	9.54177e-14	9.01697e-10	3.62127e-12	1.76418	113.367	200	0.00981874	0.017322	3068	0.0508539	1	0.156639	1.21843	39.3951	48	103	0.00627615	0.466019	unnamed,unnamed,unnamed,unnamed,unnamed,unnamed,unnamed,unnamed,unnamed,unnamed,unnamed,unnamed,unnamed,unnamed,unnamed,unnamed,unnamed,unnamed,unnamed,unnamed,unnamed,unnamed,unnamed,unnamed,unnamed,unnamed,unnamed,unnamed,unnamed,unnamed,unnamed,unnamed,unnamed,unnamed,unnamed,unnamed,unnamed,unnamed,unnamed,unnamed,unnamed,unnamed,unnamed,unnamed,unnamed,unnamed,unnamed,unnamed,unnamed,unnamed…	Abca4,Agtpbp1,Aipl1,Angpt2,Atoh7,Atp8a2,Cacnb2,Clcn2,Cln8,Crb2,Ctnna1,Cx3cr1,E2f1,Elovl4,Fkrp,Fos,Large1,Lgr4,Lpcat1,Mab21l1,Mdm1,Mef2d,Mertk,Mfrp,Naglu,Nphp4,Nr2e1,Otx2,Pde6a,Pde6b,Pomgnt1,Prph2,Rb1,Rbp3,Rd3,Rho,Rp1,Rpe65,Rras2,Sema4a,Slc24a1,Slc7a14,Spata7,Syne2,Tgfbr2,Tmem218,Tub,Vldlr
Mouse Phenotype	MP:0005065	abnormal neutrophil morphology	250	9.7075e-14	9.17358e-10	3.66943e-12	1.41186	349.186	493	0.030243	0.0426988	624	1.67686e-05	0.158463	0.000253947	1.28192	138.074	177	361	0.0231433	0.490305	unnamed,unnamed,unnamed,unnamed,unnamed,unnamed,unnamed,unnamed,unnamed,unnamed,unnamed,unnamed,unnamed,unnamed,unnamed,unnamed,unnamed,unnamed,unnamed,unnamed,unnamed,unnamed,unnamed,unnamed,unnamed,unnamed,unnamed,unnamed,unnamed,unnamed,unnamed,unnamed,unnamed,unnamed,unnamed,unnamed,unnamed,unnamed,unnamed,unnamed,unnamed,unnamed,unnamed,unnamed,unnamed,unnamed,unnamed,unnamed,unnamed,unnamed…	1810011O10Rik,3110043O21Rik,Abca1,Abcg1,Abcg5,Adam10,Akna,Ank1,Ankrd27,Arhgap15,Arhgap25,Armc7,Arntl,Asxl1,B4galnt2,B4galt1,Bach2,Bag3,Bap1,Bcl6b,Bcr,C3ar1,C4b,Ccl2,Ccl3,Ccr2,Cd40,Cd47,Cdh5,Cebpe,Cerk,Cflar,Cftr,Chst3,Ciz1,Cmklr1,Col17a1,Col1a1,Col4a3bp,Coro1a,Csf1,Csf2,Csf3r,Ctnnb1,Ctss,Cxcl12,Cxcr4,Dcc,Diaph1,Dicer1,Dmd,Dot1l,Egr1,Eomes,Esr2,Etv6,F3,Fancc,Fasl,Fcgr3,Ffar2,Foxa2,Fut4,Fzd9,G6pc3,…
Mouse Phenotype	MP:0000823	abnormal lateral ventricle morphology	251	9.95591e-14	9.40834e-10	3.74834e-12	1.47378	270.054	398	0.0233894	0.0344708	352	1.88044e-07	0.00177701	5.04833e-06	1.50039	67.3159	101	176	0.0132061	0.573864	unnamed,unnamed,unnamed,unnamed,unnamed,unnamed,unnamed,unnamed,unnamed,unnamed,unnamed,unnamed,unnamed,unnamed,unnamed,unnamed,unnamed,unnamed,unnamed,unnamed,unnamed,unnamed,unnamed,unnamed,unnamed,unnamed,unnamed,unnamed,unnamed,unnamed,unnamed,unnamed,unnamed,unnamed,unnamed,unnamed,unnamed,unnamed,unnamed,unnamed,unnamed,unnamed,unnamed,unnamed,unnamed,unnamed,unnamed,unnamed,unnamed,unnamed…	Adamts3,Ank2,Apaf1,Arhgap5,Atxn1,B4galt2,Cables1,Cdc42,Cdk5r1,Cdon,Celsr2,Cfap54,Chd7,Chl1,Clcn3,Cntn2,Col18a1,Csf1r,Ctnna1,Ctnnb1,D430042O09Rik,Dclk1,Dlg5,Dnah5,Drd1,Emx1,Emx2,Fgfr2,Fig4,Fkrp,Foxc1,Foxg1,Foxq1,Fzd3,Gdf7,Gja1,Gli3,Hsf2,Id4,Igf2bp1,Jam3,Jhy,Kcnj10,Kif20b,Lbr,Lrp2,Lrp8,Macf1,Map1b,Map3k12,Mapk8ip3,Mdm4,Mkks,Mycbp2,Myh10,Napa,Nek1,Nfia,Nfix,Nme7,Npas3,Nr2e1,Numb,Numbl,Ophn1,Pax3,Pax…
Mouse Phenotype	MP:0004438	abnormal vestibular hair cell physiology	252	1.01811e-13	9.62113e-10	3.81791e-12	6.7491	3.85237	26	0.000333654	0.00225186	8378	0.85461	1	0.963961	0.653635	1.52991	1	4	0.000130753	0.25	unnamed,unnamed,unnamed,unnamed,unnamed,unnamed,unnamed,unnamed,unnamed,unnamed,unnamed,unnamed,unnamed,unnamed,unnamed,unnamed,unnamed,unnamed,unnamed,unnamed,unnamed,unnamed,unnamed,unnamed,unnamed,unnamed	Atp2b2
Mouse Phenotype	MP:0008946	abnormal neuron number	253	1.04923e-13	9.91519e-10	3.91905e-12	1.24744	875.39	1092	0.0758176	0.0945782	35	2.37561e-20	2.24495e-16	6.41415e-18	1.50578	206.537	311	540	0.0406642	0.575926	unnamed,unnamed,unnamed,unnamed,unnamed,unnamed,unnamed,unnamed,unnamed,unnamed,unnamed,unnamed,unnamed,unnamed,unnamed,unnamed,unnamed,unnamed,unnamed,unnamed,unnamed,unnamed,unnamed,unnamed,unnamed,unnamed,unnamed,unnamed,unnamed,unnamed,unnamed,unnamed,unnamed,unnamed,unnamed,unnamed,unnamed,unnamed,unnamed,unnamed,unnamed,unnamed,unnamed,unnamed,unnamed,unnamed,unnamed,unnamed,unnamed,unnamed…	Abca4,Acot7,Adcyap1,Adrb2,Agtpbp1,Aipl1,Ank3,Apaf1,Arsg,Ascl1,Atf2,Atg7,Atmin,Atoh7,Atp2b2,Atp8a2,Atxn1,Avil,B4galt2,Barhl2,Bcar3,Bcl2,Bdnf,Bhlhe22,Brinp1,Cacna1a,Cacna1d,Cacna1g,Cacna2d2,Cacnb2,Cadps2,Camk4,Cdc42,Cdh2,Cdh23,Cers1,Chd7,Chrna1,Chrna4,Clcn3,Cnga3,Cnp,Cntfr,Col11a1,Col25a1,Cox10,Cp,Crb2,Crlf1,Cry2,Crybb2,Csf1,Ctnna2,Ctnnb1,Cux1,Cux2,Cx3cr1,Cys1,Dagla,Dfna5,Dll1,Dmrta2,Dnmt3a,Dscaml1…
Mouse Phenotype	MP:0000703	abnormal thymus morphology	254	1.17172e-13	1.10728e-09	4.35937e-12	1.2874	667.237	859	0.0577895	0.0743981	361	2.3382e-07	0.0022096	6.12078e-06	1.26862	219.924	279	575	0.0364801	0.485217	unnamed,unnamed,unnamed,unnamed,unnamed,unnamed,unnamed,unnamed,unnamed,unnamed,unnamed,unnamed,unnamed,unnamed,unnamed,unnamed,unnamed,unnamed,unnamed,unnamed,unnamed,unnamed,unnamed,unnamed,unnamed,unnamed,unnamed,unnamed,unnamed,unnamed,unnamed,unnamed,unnamed,unnamed,unnamed,unnamed,unnamed,unnamed,unnamed,unnamed,unnamed,unnamed,unnamed,unnamed,unnamed,unnamed,unnamed,unnamed,unnamed,unnamed…	Abca1,Abcc10,Abcc4,Abl1,Ada,Adam10,Aff1,Akt3,Alpl,Ank1,Ap2b1,Apc,Ar,Arhgap5,Arid5b,Asxl1,Atg16l1,Atmin,Bad,Bag3,Bcl11a,Bcl11b,Bcl2,Bcl2l1,Bcl2l11,Bhlhe40,Bmp10,Cacna1a,Cacna2d2,Cacnb4,Cacybp,Casp8,Cbx4,Ccnd1,Ccnd3,Cd28,Cd40,Cdkn2a,Cflar,Chd4,Chd7,Chst11,Cish,Col10a1,Col1a1,Coro1a,Crebbp,Csf1,Ctcf,Ctla4,Cux1,Cxadr,Cxcr4,Cycs,Cyld,Cys1,Dab1,Dad1,Dagla,Dck,Dicer1,Dnase2a,Dock1,Drosha,Dusp5,Dyrk1a,E2…
Mouse Phenotype	MP:0006330	syndromic hearing impairment	255	1.1989e-13	1.13296e-09	4.44299e-12	3.69646	12.7149	47	0.00110123	0.00407067	2700	0.0334368	1	0.117029	2.17878	2.29486	5	6	0.000653766	0.833333	unnamed,unnamed,unnamed,unnamed,unnamed,unnamed,unnamed,unnamed,unnamed,unnamed,unnamed,unnamed,unnamed,unnamed,unnamed,unnamed,unnamed,unnamed,unnamed,unnamed,unnamed,unnamed,unnamed,unnamed,unnamed,unnamed,unnamed,unnamed,unnamed,unnamed,unnamed,unnamed,unnamed,unnamed,unnamed,unnamed,unnamed,unnamed,unnamed,unnamed,unnamed,unnamed,unnamed,unnamed,unnamed,unnamed,unnamed	Atp2b2,Emx2,Kcnq1,Lmx1a,Marveld2
Mouse Phenotype	MP:0002144	abnormal B cell differentiation	256	1.24293e-13	1.17457e-09	4.58817e-12	1.37667	407.504	561	0.035294	0.0485883	452	1.14978e-06	0.0108654	2.40386e-05	1.3302	130.807	174	342	0.022751	0.508772	unnamed,unnamed,unnamed,unnamed,unnamed,unnamed,unnamed,unnamed,unnamed,unnamed,unnamed,unnamed,unnamed,unnamed,unnamed,unnamed,unnamed,unnamed,unnamed,unnamed,unnamed,unnamed,unnamed,unnamed,unnamed,unnamed,unnamed,unnamed,unnamed,unnamed,unnamed,unnamed,unnamed,unnamed,unnamed,unnamed,unnamed,unnamed,unnamed,unnamed,unnamed,unnamed,unnamed,unnamed,unnamed,unnamed,unnamed,unnamed,unnamed,unnamed…	Abl1,Adam10,Adgrg3,Akap13,Ar,Arhgap17,Arid3a,Arid3b,Arid5b,Arntl,Atmin,Avpr1a,Bach2,Bad,Batf,Bcl11a,Bcl2,Bcl2l11,Birc3,Blk,Cbfa2t3,Cd22,Cd24a,Cd28,Cd37,Cd40,Cd40lg,Cd74,Cd81,Cdh17,Chek2,Col1a1,Crebbp,Ctnnbl1,Cxcl12,Cxcr4,Cycs,Cyld,Dck,Def6,Dicer1,Dlk1,Dnmt1,Dntt,Dock10,Dock2,Dynll1,Dyrk1a,Ebf1,Erg,Esr1,Esr2,Etv6,Fbxo7,Fli1,Foxp1,Fyn,Fzd9,Gcnt1,Ggta1,Gnrh1,Gon4l,Grb2,Hes1,Hoxc4,Icos,Ifng,Ifngr2,Ik…
Mouse Phenotype	MP:0011003	reduced AMPA-mediated synaptic currents	257	1.29112e-13	1.22011e-09	4.74749e-12	2.51775	33.3631	84	0.00288958	0.00727525	1316	0.00155116	1	0.0111387	1.99935	6.5021	13	17	0.00169979	0.764706	unnamed,unnamed,unnamed,unnamed,unnamed,unnamed,unnamed,unnamed,unnamed,unnamed,unnamed,unnamed,unnamed,unnamed,unnamed,unnamed,unnamed,unnamed,unnamed,unnamed,unnamed,unnamed,unnamed,unnamed,unnamed,unnamed,unnamed,unnamed,unnamed,unnamed,unnamed,unnamed,unnamed,unnamed,unnamed,unnamed,unnamed,unnamed,unnamed,unnamed,unnamed,unnamed,unnamed,unnamed,unnamed,unnamed,unnamed,unnamed,unnamed,unnamed…	Cacng2,Cnih2,Cnih3,Dlg4,Ext1,Gria1,Grin1,Kalrn,Mapk8ip2,Neurod6,Nlgn3,Nrxn2,Nrxn3
Mouse Phenotype	MP:0001435	no suckling reflex	258	1.29658e-13	1.22527e-09	4.74911e-12	2.66148	28.5555	76	0.0024732	0.00658237	3354	0.0729057	1	0.205414	1.56872	5.73715	9	15	0.00117678	0.6	unnamed,unnamed,unnamed,unnamed,unnamed,unnamed,unnamed,unnamed,unnamed,unnamed,unnamed,unnamed,unnamed,unnamed,unnamed,unnamed,unnamed,unnamed,unnamed,unnamed,unnamed,unnamed,unnamed,unnamed,unnamed,unnamed,unnamed,unnamed,unnamed,unnamed,unnamed,unnamed,unnamed,unnamed,unnamed,unnamed,unnamed,unnamed,unnamed,unnamed,unnamed,unnamed,unnamed,unnamed,unnamed,unnamed,unnamed,unnamed,unnamed,unnamed…	Cntfr,Dync1h1,Grin1,Grin2b,Hand2,Igf2r,Inhba,Ntrk2,Pou4f1
Mouse Phenotype	MP:0012315	impaired learning	259	1.34513e-13	1.27115e-09	4.9079e-12	1.63332	157.348	257	0.0136279	0.0222588	1146	0.000766278	1	0.00631879	1.46669	31.3631	46	82	0.00601464	0.560976	unnamed,unnamed,unnamed,unnamed,unnamed,unnamed,unnamed,unnamed,unnamed,unnamed,unnamed,unnamed,unnamed,unnamed,unnamed,unnamed,unnamed,unnamed,unnamed,unnamed,unnamed,unnamed,unnamed,unnamed,unnamed,unnamed,unnamed,unnamed,unnamed,unnamed,unnamed,unnamed,unnamed,unnamed,unnamed,unnamed,unnamed,unnamed,unnamed,unnamed,unnamed,unnamed,unnamed,unnamed,unnamed,unnamed,unnamed,unnamed,unnamed,unnamed…	Adcy1,App,Arhgap32,Arsg,Brd7,Btg1,Cacna1b,Camk2a,Camkk2,Camkmt,Chrnb2,Disc1,Eml1,Emx1,Eno2,Esr1,Fosb,Gabbr1,Gabbr2,Gabra1,Gria2,Grin1,Itpr3,Kalrn,Kcnab1,Nr4a2,Nrep,Pak6,Prex1,Pten,Rasgrf1,Rbfox3,Rnf180,Shank3,Slc12a5,Sorcs3,Sorl1,Sp4,Srgap3,Syn1,Syn3,Syt4,Tacr3,Tbr1,Thrb,Wwc1
Mouse Phenotype	MP:0002565	delayed circadian phase	260	1.63976e-13	1.54958e-09	5.95991e-12	3.72675	12.3432	46	0.00106904	0.00398406	2304	0.0191361	1	0.0784878	2.03353	3.44229	7	9	0.000915272	0.777778	unnamed,unnamed,unnamed,unnamed,unnamed,unnamed,unnamed,unnamed,unnamed,unnamed,unnamed,unnamed,unnamed,unnamed,unnamed,unnamed,unnamed,unnamed,unnamed,unnamed,unnamed,unnamed,unnamed,unnamed,unnamed,unnamed,unnamed,unnamed,unnamed,unnamed,unnamed,unnamed,unnamed,unnamed,unnamed,unnamed,unnamed,unnamed,unnamed,unnamed,unnamed,unnamed,unnamed,unnamed,unnamed,unnamed	Adcyap1r1,Arntl,Bhlhe40,Naglu,Ngb,Phlpp1,Usp2
Mouse Phenotype	MP:0002862	altered righting response	261	1.72211e-13	1.6274e-09	6.23524e-12	1.47163	267.051	393	0.0231293	0.0340378	289	3.34722e-08	0.000316313	1.09451e-06	1.58295	56.224	89	147	0.011637	0.605442	unnamed,unnamed,unnamed,unnamed,unnamed,unnamed,unnamed,unnamed,unnamed,unnamed,unnamed,unnamed,unnamed,unnamed,unnamed,unnamed,unnamed,unnamed,unnamed,unnamed,unnamed,unnamed,unnamed,unnamed,unnamed,unnamed,unnamed,unnamed,unnamed,unnamed,unnamed,unnamed,unnamed,unnamed,unnamed,unnamed,unnamed,unnamed,unnamed,unnamed,unnamed,unnamed,unnamed,unnamed,unnamed,unnamed,unnamed,unnamed,unnamed,unnamed…	Aplp2,App,Arntl,Atp2a2,Atp2b2,Auts2,B4galnt1,Bdnf,Bsn,Cacna1a,Cacna1i,Cacnb4,Cacng2,Ccl2,Ccl3,Chd7,Chn1,Dab1,Drd1,Dst,Eml1,En1,En2,Epha10,Eps8,Faah,Foxa2,Gabrg2,Galc,Gli1,Gli2,Glra1,Gnao1,Gnb5,Grid2,Grin1,Grm1,Grm7,Hexb,Hoxb1,Inpp4a,Itpr1,Kcne1,Kcnj10,Kcnj6,Kcnq1,Lmx1a,Map2k4,Mcoln3,Mog,Myo5a,Napa,Ndufs4,Nf2,Nlgn3,Npy2r,Nr4a2,Ntn1,Ntrk2,Pbx3,Pcdh15,Pkp4,Pmp22,Postn,Pou4f1,Pparg,Prdm14,Prepl,Prkce…
Mouse Phenotype	MP:0008129	absent brain internal capsule	262	1.823e-13	1.72274e-09	6.57533e-12	3.59204	13.3629	48	0.00115736	0.00415728	1747	0.0062833	1	0.0339881	1.91733	5.73715	11	15	0.00143829	0.733333	unnamed,unnamed,unnamed,unnamed,unnamed,unnamed,unnamed,unnamed,unnamed,unnamed,unnamed,unnamed,unnamed,unnamed,unnamed,unnamed,unnamed,unnamed,unnamed,unnamed,unnamed,unnamed,unnamed,unnamed,unnamed,unnamed,unnamed,unnamed,unnamed,unnamed,unnamed,unnamed,unnamed,unnamed,unnamed,unnamed,unnamed,unnamed,unnamed,unnamed,unnamed,unnamed,unnamed,unnamed,unnamed,unnamed,unnamed,unnamed	Celsr3,Cntn2,Dclk1,Enah,Evl,Fbxo45,Fzd3,Islr2,Map3k12,Mycbp2,Ttl
Mouse Phenotype	MP:0008456	abnormal retinal rod cell outer segment morphology	263	1.82325e-13	1.72297e-09	6.55121e-12	2.64266	28.7589	76	0.00249081	0.00658237	7747	0.637708	1	0.777894	0.958665	11.4743	11	30	0.00143829	0.366667	unnamed,unnamed,unnamed,unnamed,unnamed,unnamed,unnamed,unnamed,unnamed,unnamed,unnamed,unnamed,unnamed,unnamed,unnamed,unnamed,unnamed,unnamed,unnamed,unnamed,unnamed,unnamed,unnamed,unnamed,unnamed,unnamed,unnamed,unnamed,unnamed,unnamed,unnamed,unnamed,unnamed,unnamed,unnamed,unnamed,unnamed,unnamed,unnamed,unnamed,unnamed,unnamed,unnamed,unnamed,unnamed,unnamed,unnamed,unnamed,unnamed,unnamed…	Cln8,Crb2,Elovl4,Mef2d,Mfsd2a,Ntrk2,Prph2,Rho,Rpe65,Sag,Sema4a
Mouse Phenotype	MP:0005083	abnormal biliary tract morphology	264	1.85554e-13	1.75348e-09	6.64198e-12	1.7274	120.991	209	0.0104791	0.0181015	938	0.000254308	1	0.00256206	1.47068	36.7177	54	96	0.00706067	0.5625	unnamed,unnamed,unnamed,unnamed,unnamed,unnamed,unnamed,unnamed,unnamed,unnamed,unnamed,unnamed,unnamed,unnamed,unnamed,unnamed,unnamed,unnamed,unnamed,unnamed,unnamed,unnamed,unnamed,unnamed,unnamed,unnamed,unnamed,unnamed,unnamed,unnamed,unnamed,unnamed,unnamed,unnamed,unnamed,unnamed,unnamed,unnamed,unnamed,unnamed,unnamed,unnamed,unnamed,unnamed,unnamed,unnamed,unnamed,unnamed,unnamed,unnamed…	Actn4,Ank1,Arl3,Atp8b1,B9d1,Bicc1,Casp8,Celf4,Cftr,Chd2,Coro1c,Cyp11a1,Cys1,Dnah11,Frem1,Gpbar1,Gucy1b3,Hes1,Hhex,Hlx,Insr,Jag1,Kras,Ldlr,Map3k14,Map3k7,Muc1,Mybphl,Ncf1,Ndfip1,Nf2,Notch2,Onecut2,Pctp,Pdx1,Pkd1,Por,Ppp1r8,Pten,Ptf1a,Pth1r,Pzp,Relb,Rtn4rl1,Sav1,Sh3pxd2a,Sik3,Syt1,Tgfbr2,Thbs1,Tnip1,Traf6,Trappc9,Yap1
Mouse Phenotype	MP:0003639	abnormal response to vitamins	265	1.87458e-13	1.77148e-09	6.68483e-12	6.89756	3.62447	25	0.000313916	0.00216525	3380	0.0742355	1	0.207552	2.09163	1.91238	4	5	0.000523013	0.8	unnamed,unnamed,unnamed,unnamed,unnamed,unnamed,unnamed,unnamed,unnamed,unnamed,unnamed,unnamed,unnamed,unnamed,unnamed,unnamed,unnamed,unnamed,unnamed,unnamed,unnamed,unnamed,unnamed,unnamed,unnamed	Lasp1,Rarg,Tgif1,Vdr
Mouse Phenotype	MP:0002069	abnormal consumption behavior	266	1.89496e-13	1.79073e-09	6.73208e-12	1.23964	908.331	1126	0.0786706	0.0975229	118	2.9965e-13	2.83169e-09	2.39974e-11	1.35656	253.582	344	663	0.0449791	0.518854	unnamed,unnamed,unnamed,unnamed,unnamed,unnamed,unnamed,unnamed,unnamed,unnamed,unnamed,unnamed,unnamed,unnamed,unnamed,unnamed,unnamed,unnamed,unnamed,unnamed,unnamed,unnamed,unnamed,unnamed,unnamed,unnamed,unnamed,unnamed,unnamed,unnamed,unnamed,unnamed,unnamed,unnamed,unnamed,unnamed,unnamed,unnamed,unnamed,unnamed,unnamed,unnamed,unnamed,unnamed,unnamed,unnamed,unnamed,unnamed,unnamed,unnamed…	Acads,Acot13,Acvr1,Adipor2,Adrb3,Afap1,Agt,Alk,Alpl,Alx1,Ankrd26,Apba2,Aplp2,App,Arid5b,Armc7,Ascl1,Atn1,Atp6v0a4,Atp8a2,Auts2,Bbs10,Bcl11b,Bclaf1,Bdnf,Bin1,Brinp1,Brsk2,Bscl2,Bsx,C1qtnf9,Cacna1b,Cacna2d2,Camkk2,Cartpt,Cask,Ccdc7a,Ccdc80,Cckbr,Ccl2,Ccl3,Ccnd1,Ccnd3,Ccr2,Cdc42,Cdk4,Cdkal1,Cdkn1c,Cdo1,Cep19,Cftr,Chd7,Chrm3,Cldn10,Cnr1,Cntfr,Col19a1,Cpe,Cpeb4,Cpt1c,Crhr1,Crhr2,Crlf1,Crtc1,Csf1,Csf2,…
Mouse Phenotype	MP:0005328	abnormal circulating creatinine level	267	2.25868e-13	2.13446e-09	7.99422e-12	1.58613	177.792	282	0.0153986	0.024424	994	0.000344567	1	0.00327582	1.34688	63.1086	85	165	0.011114	0.515151	unnamed,unnamed,unnamed,unnamed,unnamed,unnamed,unnamed,unnamed,unnamed,unnamed,unnamed,unnamed,unnamed,unnamed,unnamed,unnamed,unnamed,unnamed,unnamed,unnamed,unnamed,unnamed,unnamed,unnamed,unnamed,unnamed,unnamed,unnamed,unnamed,unnamed,unnamed,unnamed,unnamed,unnamed,unnamed,unnamed,unnamed,unnamed,unnamed,unnamed,unnamed,unnamed,unnamed,unnamed,unnamed,unnamed,unnamed,unnamed,unnamed,unnamed…	Adora1,Agt,Angel1,Aqp11,Ar,Atp6ap2,BC048403,Bach2,Bcl2,Bdkrb2,Bmp10,Bphl,Camkmt,Ccni,Ccr2,Cd44,Cit,Cog2,Col18a1,Col4a4,Cyp17a1,Cys1,Dbn1,Dctn1,Ddc,Dusp3,Exoc3l2,Gcnt2,Glis2,Gnao1,Gpr22,Gpsm1,Ifng,Ikzf3,Jak1,Jarid2,Kdm4b,Large1,Lgmn,Lgr4,Lrp6,Mafb,Magi2,Mocs2,Myo10,Ndrg4,Nos1,Nos2,Nphs2,Papln,Parp1,Pawr,Pbx3,Phykpl,Pik3r2,Pkd1,Pou3f3,Ppp3ca,Prkci,Ptgis,Ren1,Rgs4,Rnf10,Rrm2b,Selenok,Sh2d5,Slc22a8,S…
Mouse Phenotype	MP:0002978	absent otoliths	268	2.53302e-13	2.3937e-09	8.93173e-12	2.88056	22.5651	65	0.00195436	0.00562965	6887	0.492417	1	0.675671	1.07658	6.5021	7	17	0.000915272	0.411765	unnamed,unnamed,unnamed,unnamed,unnamed,unnamed,unnamed,unnamed,unnamed,unnamed,unnamed,unnamed,unnamed,unnamed,unnamed,unnamed,unnamed,unnamed,unnamed,unnamed,unnamed,unnamed,unnamed,unnamed,unnamed,unnamed,unnamed,unnamed,unnamed,unnamed,unnamed,unnamed,unnamed,unnamed,unnamed,unnamed,unnamed,unnamed,unnamed,unnamed,unnamed,unnamed,unnamed,unnamed,unnamed,unnamed,unnamed,unnamed,unnamed,unnamed…	Abr,Atp2b2,Atp6v0a4,Bcr,Foxi1,Lmx1a,Zeb1
Mouse Phenotype	MP:0003382	straub tail	269	2.73232e-13	2.58204e-09	9.59867e-12	2.66045	27.8148	74	0.00240904	0.00640915	5311	0.268959	1	0.478566	1.18076	11.8568	14	31	0.00183054	0.451613	unnamed,unnamed,unnamed,unnamed,unnamed,unnamed,unnamed,unnamed,unnamed,unnamed,unnamed,unnamed,unnamed,unnamed,unnamed,unnamed,unnamed,unnamed,unnamed,unnamed,unnamed,unnamed,unnamed,unnamed,unnamed,unnamed,unnamed,unnamed,unnamed,unnamed,unnamed,unnamed,unnamed,unnamed,unnamed,unnamed,unnamed,unnamed,unnamed,unnamed,unnamed,unnamed,unnamed,unnamed,unnamed,unnamed,unnamed,unnamed,unnamed,unnamed…	Cacna1b,Clstn1,Elmod1,Klf14,Leprotl1,Ndfip2,Ndufs4,Psap,Rilpl1,Rnf10,Rnf144b,Thra,Tsc1,Wsb2
Mouse Phenotype	MP:0004530	absent outer hair cell stereocilia	270	3.53713e-13	3.34259e-09	1.238e-11	3.84762	11.1757	43	0.00096793	0.00372423	1766	0.00636428	1	0.0340557	2.28772	3.05981	7	8	0.000915272	0.875	unnamed,unnamed,unnamed,unnamed,unnamed,unnamed,unnamed,unnamed,unnamed,unnamed,unnamed,unnamed,unnamed,unnamed,unnamed,unnamed,unnamed,unnamed,unnamed,unnamed,unnamed,unnamed,unnamed,unnamed,unnamed,unnamed,unnamed,unnamed,unnamed,unnamed,unnamed,unnamed,unnamed,unnamed,unnamed,unnamed,unnamed,unnamed,unnamed,unnamed,unnamed,unnamed,unnamed	Atp2b2,Cacna1d,Cdh23,Cldn14,Kcne1,Msrb3,Pou4f3
Mouse Phenotype	MP:0001784	abnormal fluid regulation	271	3.87564e-13	3.66248e-09	1.35147e-11	1.21507	1072.37	1303	0.0928779	0.112853	75	1.94293e-15	1.83607e-11	2.44809e-13	1.35101	308.659	417	807	0.0545241	0.516729	unnamed,unnamed,unnamed,unnamed,unnamed,unnamed,unnamed,unnamed,unnamed,unnamed,unnamed,unnamed,unnamed,unnamed,unnamed,unnamed,unnamed,unnamed,unnamed,unnamed,unnamed,unnamed,unnamed,unnamed,unnamed,unnamed,unnamed,unnamed,unnamed,unnamed,unnamed,unnamed,unnamed,unnamed,unnamed,unnamed,unnamed,unnamed,unnamed,unnamed,unnamed,unnamed,unnamed,unnamed,unnamed,unnamed,unnamed,unnamed,unnamed,unnamed…	A1cf,Abhd5,Abl1,Abl2,Actn4,Acvr1,Acvrl1,Adam19,Adamts3,Adcy9,Adgrg6,Ago2,Akap13,Alox12b,Angpt2,Apc,Aqp4,Arid1a,Arid2,Arntl,Atf2,Atg16l1,Atmin,Atp2a2,Atp6v0a4,B4galt1,Bag3,Bcl11b,Bcr,Bhlha15,Birc3,Birc6,Bmp10,Bmp4,Btaf1,Cacna1s,Cacna2d2,Cacnb2,Casp8,Casq2,Casz1,Ccbe1,Ccm2,Ccnd1,Ccnd3,Cd44,Cd47,Cdc42,Cdc73,Cdh2,Cdh5,Cdk4,Cdkn2a,Cfh,Cflar,Cftr,Chd2,Chd7,Chrm1,Chrm3,Cir1,Cnot9,Col1a1,Commd9,Coro1c,Cr…
Mouse Phenotype	MP:0001650	abnormal seizure response to electrical stimulation	272	4.18018e-13	3.95027e-09	1.45231e-11	2.04152	61.7186	126	0.00534545	0.0109129	905	0.000196704	1	0.00205398	1.89329	11.0918	21	29	0.00274582	0.724138	unnamed,unnamed,unnamed,unnamed,unnamed,unnamed,unnamed,unnamed,unnamed,unnamed,unnamed,unnamed,unnamed,unnamed,unnamed,unnamed,unnamed,unnamed,unnamed,unnamed,unnamed,unnamed,unnamed,unnamed,unnamed,unnamed,unnamed,unnamed,unnamed,unnamed,unnamed,unnamed,unnamed,unnamed,unnamed,unnamed,unnamed,unnamed,unnamed,unnamed,unnamed,unnamed,unnamed,unnamed,unnamed,unnamed,unnamed,unnamed,unnamed,unnamed…	Akt3,Ap3m2,Bdnf,Celf4,Dnm1,Fgf13,Fosb,Gfra2,Gnao1,Grin2a,Hexb,Hrh2,Htr7,Kcnq2,Kcnq3,Ntrk2,Prickle1,Prickle2,Scn1a,Scn9a,Syn1
Mouse Phenotype	MP:0000953	abnormal oligodendrocyte morphology	273	4.2618e-13	4.0274e-09	1.47524e-11	1.91369	77.8602	149	0.00674348	0.0129049	528	3.98289e-06	0.0376383	7.12846e-05	1.77257	22.5661	40	59	0.00523013	0.677966	unnamed,unnamed,unnamed,unnamed,unnamed,unnamed,unnamed,unnamed,unnamed,unnamed,unnamed,unnamed,unnamed,unnamed,unnamed,unnamed,unnamed,unnamed,unnamed,unnamed,unnamed,unnamed,unnamed,unnamed,unnamed,unnamed,unnamed,unnamed,unnamed,unnamed,unnamed,unnamed,unnamed,unnamed,unnamed,unnamed,unnamed,unnamed,unnamed,unnamed,unnamed,unnamed,unnamed,unnamed,unnamed,unnamed,unnamed,unnamed,unnamed,unnamed…	Afg3l1,Cnp,Csf1,Galc,Gjb1,Gjc2,Gpm6b,Gpr17,Hes1,Igf1r,Il1b,Kcnj10,Mag,Mbp,Mgat5b,Mog,Myrf,Nf1,Nkx2-2,Nos2,Nrg1,Olig1,Olig2,Pdgfra,Pex5,Plp1,Plxna1,Pnkp,Prkab1,Pten,Ptprc,Ptprz1,Qk,Rheb,Sox10,Tenm4,Tnfrsf21,Tyrobp,Ugt8a,Zfp365
Mouse Phenotype	MP:0003858	enhanced coordination	274	4.63591e-13	4.38094e-09	1.59888e-11	2.37058	37.9654	90	0.00328819	0.00779491	3869	0.109455	1	0.267343	1.30727	13.0042	17	34	0.0022228	0.5	unnamed,unnamed,unnamed,unnamed,unnamed,unnamed,unnamed,unnamed,unnamed,unnamed,unnamed,unnamed,unnamed,unnamed,unnamed,unnamed,unnamed,unnamed,unnamed,unnamed,unnamed,unnamed,unnamed,unnamed,unnamed,unnamed,unnamed,unnamed,unnamed,unnamed,unnamed,unnamed,unnamed,unnamed,unnamed,unnamed,unnamed,unnamed,unnamed,unnamed,unnamed,unnamed,unnamed,unnamed,unnamed,unnamed,unnamed,unnamed,unnamed,unnamed…	Adra1d,Atp1a3,Camk2a,Cd44,Chrnb2,Drd4,Elovl6,Galnt14,Gpr37l1,Htr7,Ifitm1,Kalrn,Lrrk2,Nlgn3,Nos1,Senp1,Vapb
Mouse Phenotype	MP:0001573	abnormal circulating alanine transaminase level	275	4.6526e-13	4.3967e-09	1.5988e-11	1.54306	198.955	307	0.0172315	0.0265893	1326	0.0015831	1	0.0112823	1.26919	78.7902	100	206	0.0130753	0.485437	unnamed,unnamed,unnamed,unnamed,unnamed,unnamed,unnamed,unnamed,unnamed,unnamed,unnamed,unnamed,unnamed,unnamed,unnamed,unnamed,unnamed,unnamed,unnamed,unnamed,unnamed,unnamed,unnamed,unnamed,unnamed,unnamed,unnamed,unnamed,unnamed,unnamed,unnamed,unnamed,unnamed,unnamed,unnamed,unnamed,unnamed,unnamed,unnamed,unnamed,unnamed,unnamed,unnamed,unnamed,unnamed,unnamed,unnamed,unnamed,unnamed,unnamed…	Abcb11,Abhd5,Acox1,Adar,Agpat3,Alb,Amfr,Ank1,Arntl,Atg7,Atp8b1,Bcr,Boc,Cacna1b,Casp8,Ccdc92,Ccr2,Cd84,Cog2,Col1a1,Dbn1,Degs1,Dusp1,Egr1,Eif4e3,Esco1,Fasl,Fbxo7,Fcmr,Fkbp9,Fkrp,Fndc7,Fth1,Fto,G0s2,Gc,Gclm,Gjb3,Gpat3,Grin2b,Gsta4,Hmgcr,Ide,Ifng,Irf1,Jag1,Kazn,Kif21b,Ldha,Ldlr,Lhx6,Ltbp1,Map3k7,Mc4r,Mfsd2a,Mrps34,Mst1r,Mt1,Ncoa5,Nf1,Nfe2l1,Nos2,Notch2,Oma1,Pafah2,Pde10a,Pex3,Pik3cg,Pla2g16,Por,Pparg…
Mouse Phenotype	MP:0000693	spleen hyperplasia	276	4.73549e-13	4.47504e-09	1.62139e-11	1.73759	113.951	198	0.0098693	0.0171488	1015	0.000388174	1	0.00361403	1.42831	41.3075	59	108	0.00771444	0.546296	unnamed,unnamed,unnamed,unnamed,unnamed,unnamed,unnamed,unnamed,unnamed,unnamed,unnamed,unnamed,unnamed,unnamed,unnamed,unnamed,unnamed,unnamed,unnamed,unnamed,unnamed,unnamed,unnamed,unnamed,unnamed,unnamed,unnamed,unnamed,unnamed,unnamed,unnamed,unnamed,unnamed,unnamed,unnamed,unnamed,unnamed,unnamed,unnamed,unnamed,unnamed,unnamed,unnamed,unnamed,unnamed,unnamed,unnamed,unnamed,unnamed,unnamed…	Adam10,Asxl1,Bcl11b,Bcl2l11,Bhlhe40,Cdkn2b,Cftr,Cish,Col1a1,Cpt1c,Csf3r,Ctla4,Cycs,Dtx1,Esr2,Fli1,Foxo3,Gadd45b,Gadd45g,Gba,Hip1,Ikzf1,Il10rb,Ing2,Inpp5d,Irf8,Kit,Kitl,Klf13,Lat,Ldha,Lgals9,Lrfn2,Lyn,Map3k7,Mark2,Mdm2,Mfge8,Mt1,Nf1,Orai1,Pawr,Plcg2,Pten,Ptprc,Relb,Runx1,Sh2b3,Sipa1,Slc20a1,Spi1,Tank,Tnfaip8l2,Tnfrsf11a,Tnfrsf1a,Tnip1,Traf3ip2,Vcam1,Zfp36
Mouse Phenotype	MP:0012258	philtrum hypoplasia	277	5.22439e-13	4.93705e-09	1.78233e-11	8.89534	2.24837	20	0.000194731	0.0017322	6042	0.382476	1	0.598213	2.61454	0.382476	1	1	0.000130753	1	unnamed,unnamed,unnamed,unnamed,unnamed,unnamed,unnamed,unnamed,unnamed,unnamed,unnamed,unnamed,unnamed,unnamed,unnamed,unnamed,unnamed,unnamed,unnamed,unnamed	Tgif1
Mouse Phenotype	MP:0000199	abnormal circulating serum albumin level	278	6.10284e-13	5.76718e-09	2.07453e-11	1.63154	149.552	244	0.0129527	0.0211329	1151	0.000776286	1	0.0063735	1.3426	56.6065	76	148	0.00993724	0.513513	unnamed,unnamed,unnamed,unnamed,unnamed,unnamed,unnamed,unnamed,unnamed,unnamed,unnamed,unnamed,unnamed,unnamed,unnamed,unnamed,unnamed,unnamed,unnamed,unnamed,unnamed,unnamed,unnamed,unnamed,unnamed,unnamed,unnamed,unnamed,unnamed,unnamed,unnamed,unnamed,unnamed,unnamed,unnamed,unnamed,unnamed,unnamed,unnamed,unnamed,unnamed,unnamed,unnamed,unnamed,unnamed,unnamed,unnamed,unnamed,unnamed,unnamed…	Ada,Adpgk,Aff3,Agr2,Alb,Ap1m2,Ap2a2,Arl5c,Arpc1b,Atad2b,Atg16l1,Atn1,Atp6ap2,Atp8b2,Boc,Cacybp,Camkmt,Cand2,Chd9,Commd9,Cyb561,Cyb5d1,Cyld,Cyp17a1,Dbn1,Dclk1,Dpp9,Elk4,Entpd1,Esco1,Fgf23,Galnt18,Gas6,Gatm,Gse1,Hlx,Hpse2,Insr,Jak1,Kdm4c,Kif21b,Kl,Klf7,Kptn,Ltbp1,Miga2,Ndfip2,Nek10,Neurog3,Nos2,Peli1,Pex3,Pgam5,Rcc2,Relb,Rhpn1,Rnf10,Rrm2b,Rsad1,Rspo1,Sdc4,Sez6l,Sgsm1,Slc15a3,Slc38a10,Slco1b2,Sptbn1…
Mouse Phenotype	MP:0011088	neonatal lethality, incomplete penetrance	279	6.25473e-13	5.91072e-09	2.11854e-11	1.28577	635.418	817	0.0550336	0.0707604	100	7.08812e-14	6.69827e-10	6.69828e-12	1.47893	151.461	224	396	0.0292887	0.565657	unnamed,unnamed,unnamed,unnamed,unnamed,unnamed,unnamed,unnamed,unnamed,unnamed,unnamed,unnamed,unnamed,unnamed,unnamed,unnamed,unnamed,unnamed,unnamed,unnamed,unnamed,unnamed,unnamed,unnamed,unnamed,unnamed,unnamed,unnamed,unnamed,unnamed,unnamed,unnamed,unnamed,unnamed,unnamed,unnamed,unnamed,unnamed,unnamed,unnamed,unnamed,unnamed,unnamed,unnamed,unnamed,unnamed,unnamed,unnamed,unnamed,unnamed…	Abl1,Abr,Ackr3,Ada,Adam22,Akap8,Alk,Ank1,Ank2,Ano6,Ap3b1,Apba1,Apba2,Ar,Arid5b,Asxl1,Atp2a2,Atxn1,Azin1,B4galt1,Bcr,Bicc1,Bmp7,Brsk2,Cacna1a,Cald1,Casp7,Ccnd1,Ccnd3,Cd44,Cdc42,Cdkn1c,Cdon,Cebpb,Celf4,Col1a1,Cpeb4,Ctnna2,Cux1,Cyp11a1,Daam1,Dact1,Dand5,Deaf1,Dlk1,Dlx1,Dlx2,Dmrta2,Dpp9,Dsc3,E2f1,E2f3,Egr2,F3,F7,Fat1,Fbn2,Fbxo11,Fbxw4,Fbxw8,Fezf1,Fgf8,Fgfr3,Fign,Fkrp,Fos,Foxa2,Foxf1,Frem2,Gab1,Gata4,…
Mouse Phenotype	MP:0002557	abnormal social/conspecific interaction	280	6.35082e-13	6.00153e-09	2.1434e-11	1.29439	601.829	779	0.0521245	0.0674692	56	8.01046e-17	7.56989e-13	1.35177e-14	1.56432	136.162	213	356	0.0278504	0.598315	unnamed,unnamed,unnamed,unnamed,unnamed,unnamed,unnamed,unnamed,unnamed,unnamed,unnamed,unnamed,unnamed,unnamed,unnamed,unnamed,unnamed,unnamed,unnamed,unnamed,unnamed,unnamed,unnamed,unnamed,unnamed,unnamed,unnamed,unnamed,unnamed,unnamed,unnamed,unnamed,unnamed,unnamed,unnamed,unnamed,unnamed,unnamed,unnamed,unnamed,unnamed,unnamed,unnamed,unnamed,unnamed,unnamed,unnamed,unnamed,unnamed,unnamed…	3110043O21Rik,Adcyap1,Adgrl1,Afap1,Ap3b1,Apba2,Apc,Ar,Arhgap10,Arhgap32,Arid5b,Arpc3,Atg7,Avpr1a,Bdnf,Brd7,Brinp1,Cacna1a,Cacna1b,Cacna2d2,Cadps2,Camk2b,Ccnd1,Cdh23,Chd7,Chrm2,Chrnb2,Chst1,Chst3,Chst8,Ciz1,Ckb,Cnr1,Cntnap2,Crebbp,Crebrf,Crhr2,Csf1,Csf1r,Cspg5,Ctnna2,Ctnnb1,Cux1,Cyp17a1,Ddc,Ddo,Disc1,Dlg4,Ebf2,Efna3,Efna5,Egr1,Emx1,En2,Eomes,Epha4,Esr1,Esr2,Etv5,Ext1,Fign,Fmn2,Fos,Fosb,Foxa2,Fyn,G…
Mouse Phenotype	MP:0001072	abnormal vestibulocochlear nerve morphology	281	6.49022e-13	6.13325e-09	2.18265e-11	2.05443	59.3839	122	0.00514325	0.0105664	1191	0.000930097	1	0.00737987	1.9609	7.64953	15	20	0.0019613	0.75	unnamed,unnamed,unnamed,unnamed,unnamed,unnamed,unnamed,unnamed,unnamed,unnamed,unnamed,unnamed,unnamed,unnamed,unnamed,unnamed,unnamed,unnamed,unnamed,unnamed,unnamed,unnamed,unnamed,unnamed,unnamed,unnamed,unnamed,unnamed,unnamed,unnamed,unnamed,unnamed,unnamed,unnamed,unnamed,unnamed,unnamed,unnamed,unnamed,unnamed,unnamed,unnamed,unnamed,unnamed,unnamed,unnamed,unnamed,unnamed,unnamed,unnamed…	Adgrg6,Atp2b2,Bdnf,Cacna1d,Chd7,Erbb4,Hoxa1,Kcnj10,Nrp1,Ntrk2,Ntrk3,Otulin,Pax2,Sod1,Tbx1
Mouse Phenotype	MP:0003880	abnormal central pattern generator function	282	6.52226e-13	6.16354e-09	2.18565e-11	2.34251	38.8472	91	0.00336456	0.00788152	2167	0.0139273	1	0.0607351	1.69945	7.64953	13	20	0.00169979	0.65	unnamed,unnamed,unnamed,unnamed,unnamed,unnamed,unnamed,unnamed,unnamed,unnamed,unnamed,unnamed,unnamed,unnamed,unnamed,unnamed,unnamed,unnamed,unnamed,unnamed,unnamed,unnamed,unnamed,unnamed,unnamed,unnamed,unnamed,unnamed,unnamed,unnamed,unnamed,unnamed,unnamed,unnamed,unnamed,unnamed,unnamed,unnamed,unnamed,unnamed,unnamed,unnamed,unnamed,unnamed,unnamed,unnamed,unnamed,unnamed,unnamed,unnamed…	Chn1,Cplx2,Dbx1,Epha4,Kdm6b,Nck2,Ndufs4,Nlgn1,Nlgn2,Nlgn3,Robo3,Slc12a5,Slc17a6
Mouse Phenotype	MP:0001963	abnormal hearing physiology	283	6.64774e-13	6.28211e-09	2.21983e-11	1.28537	635.616	817	0.0550508	0.0707604	154	2.39789e-11	2.26601e-07	1.47143e-09	1.39634	174.027	243	455	0.031773	0.534066	unnamed,unnamed,unnamed,unnamed,unnamed,unnamed,unnamed,unnamed,unnamed,unnamed,unnamed,unnamed,unnamed,unnamed,unnamed,unnamed,unnamed,unnamed,unnamed,unnamed,unnamed,unnamed,unnamed,unnamed,unnamed,unnamed,unnamed,unnamed,unnamed,unnamed,unnamed,unnamed,unnamed,unnamed,unnamed,unnamed,unnamed,unnamed,unnamed,unnamed,unnamed,unnamed,unnamed,unnamed,unnamed,unnamed,unnamed,unnamed,unnamed,unnamed…	9930012K11Rik,Aak1,Actg1,Adgrb1,Aff3,Agtpbp1,Aldob,Ankrd11,Ankrd53,Aqp4,Arsa,Arsb,Ascc2,Asic2,Atad2b,Atf2,Atf6b,Atp2b2,Atp6v0a4,Atp8a2,Atp8b1,Barhl1,Bdnf,Blk,Bmp4,Bmp5,Bphl,Bsn,Cacna1d,Cacng2,Ccdc92,Cdh23,Chd7,Chrna9,Ckap4,Cldn11,Cldn14,Clec16a,Clic5,Cmah,Coch,Col11a1,Col1a1,Col4a4,Col9a1,Colca2,Csf1,Csf1r,Ctnnb1,Cys1,Dfna5,Dlx1,Dmd,Dnah5,Dnm1,Dock2,Dtnbp1,Dusp6,Ednra,Ednrb,Egr2,Elmod1,Emx1,Emx2,…
Mouse Phenotype	MP:0000859	abnormal somatosensory cortex morphology	284	7.7275e-13	7.30249e-09	2.5713e-11	1.84706	87.1656	161	0.00754942	0.0139442	779	6.95965e-05	0.657687	0.00084427	1.86753	13.3867	25	35	0.00326883	0.714286	unnamed,unnamed,unnamed,unnamed,unnamed,unnamed,unnamed,unnamed,unnamed,unnamed,unnamed,unnamed,unnamed,unnamed,unnamed,unnamed,unnamed,unnamed,unnamed,unnamed,unnamed,unnamed,unnamed,unnamed,unnamed,unnamed,unnamed,unnamed,unnamed,unnamed,unnamed,unnamed,unnamed,unnamed,unnamed,unnamed,unnamed,unnamed,unnamed,unnamed,unnamed,unnamed,unnamed,unnamed,unnamed,unnamed,unnamed,unnamed,unnamed,unnamed…	Adcy1,Arhgap33,Bdnf,Bhlhe22,Dlg3,Dyrk1a,Emx1,Epha4,Esr2,Fyn,Gap43,Grin1,Grin2b,Lef1,Lmo4,Mapt,Neurod6,Nf1,Nr2f1,Ntrk2,Plxna4,Rac1,Rims1,Tuba1a,Wdfy3
Mouse Phenotype	MP:0002968	increased circulating alkaline phosphatase level	285	8.04824e-13	7.60559e-09	2.66863e-11	1.5343	200.743	308	0.0173864	0.0266759	630	1.85669e-05	0.175457	0.000278503	1.38897	73.4355	102	192	0.0133368	0.53125	unnamed,unnamed,unnamed,unnamed,unnamed,unnamed,unnamed,unnamed,unnamed,unnamed,unnamed,unnamed,unnamed,unnamed,unnamed,unnamed,unnamed,unnamed,unnamed,unnamed,unnamed,unnamed,unnamed,unnamed,unnamed,unnamed,unnamed,unnamed,unnamed,unnamed,unnamed,unnamed,unnamed,unnamed,unnamed,unnamed,unnamed,unnamed,unnamed,unnamed,unnamed,unnamed,unnamed,unnamed,unnamed,unnamed,unnamed,unnamed,unnamed,unnamed…	Abcb11,Acox1,Adar,Adora2b,Afap1l2,Aldob,Alk,Ank,Ap2a2,Arhgef4,Asgr1,Asxl1,Atg7,Atp6v1h,Atp8b1,B4galnt2,Bap1,Btbd9,Casp8,Cdca8,Chd9,Chn1,Col1a1,Creb3l1,Cyb5d1,Cyp17a1,Cystm1,Daam2,Dclk1,Degs1,Dpp9,Dynll1,Eif4g2,Elk4,Elmod1,Elovl6,Fam20c,Fech,Fgf23,Gas6,Gmds,Gse1,Hpn,Hpse2,Insr,Jag1,Jak1,Kptn,Leprotl1,Lmna,Map3k7,Mt1,Mta3,Mtmr3,Mtss1,Myh10,Ncald,Ncoa1,Ndrg4,Nfkb1,Nos1,Nos2,Notch2,Npr3,Nt5e,Nucb2,Oc…
Mouse Phenotype	MP:0020357	abnormal excitatory synapse morphology	286	9.44163e-13	8.92234e-09	3.1197e-11	4.34874	8.27826	36	0.000716981	0.00311796	6641	0.419378	1	0.596765	1.30727	2.29486	3	6	0.000392259	0.5	unnamed,unnamed,unnamed,unnamed,unnamed,unnamed,unnamed,unnamed,unnamed,unnamed,unnamed,unnamed,unnamed,unnamed,unnamed,unnamed,unnamed,unnamed,unnamed,unnamed,unnamed,unnamed,unnamed,unnamed,unnamed,unnamed,unnamed,unnamed,unnamed,unnamed,unnamed,unnamed,unnamed,unnamed,unnamed,unnamed	Prrt2,Rbfox3,Shank2
Mouse Phenotype	MP:0000886	abnormal cerebellar granule layer morphology	287	1.01142e-12	9.55794e-09	3.33029e-11	1.51334	214.095	324	0.0185428	0.0280617	680	2.61103e-05	0.246742	0.000362857	1.47068	48.957	72	128	0.00941423	0.5625	unnamed,unnamed,unnamed,unnamed,unnamed,unnamed,unnamed,unnamed,unnamed,unnamed,unnamed,unnamed,unnamed,unnamed,unnamed,unnamed,unnamed,unnamed,unnamed,unnamed,unnamed,unnamed,unnamed,unnamed,unnamed,unnamed,unnamed,unnamed,unnamed,unnamed,unnamed,unnamed,unnamed,unnamed,unnamed,unnamed,unnamed,unnamed,unnamed,unnamed,unnamed,unnamed,unnamed,unnamed,unnamed,unnamed,unnamed,unnamed,unnamed,unnamed…	Abl1,Abl2,Abr,Agtpbp1,Akt3,Apc2,Ass1,Astn1,Atp2b2,Bcr,Bid,Cacna1a,Camta1,Cbln1,Ccnd1,Cdk5r1,Cit,Cntn1,Cp,Ctnna2,Dab1,En1,En2,Eno2,Erbb4,Fgf13,Gas1,Gja1,Gli1,Gli2,Grid2,Itgb1,Kcnj6,Kmt2a,Lgi1,Lyst,Map2k4,Mdm2,Mdm4,Msx2,Mthfr,Mycn,Myh10,Neurod1,Nfia,Nfib,Nr1d1,Nrcam,Ntf3,Numb,Pax6,Pdyn,Pex2,Plp1,Plxna2,Pomk,Ppt2,Prkab1,Pten,Ptf1a,Pura,Rb1,Ric8a,Rora,Scn8a,Sema6a,Shh,Slc12a5,Smad2,Sorcs2,Tnik,Trio
Mouse Phenotype	MP:0001586	abnormal erythrocyte cell number	288	1.02813e-12	9.71581e-09	3.37355e-11	1.38898	355.655	494	0.0308033	0.0427854	940	0.000260397	1	0.00261782	1.25634	117.803	148	308	0.0193515	0.480519	unnamed,unnamed,unnamed,unnamed,unnamed,unnamed,unnamed,unnamed,unnamed,unnamed,unnamed,unnamed,unnamed,unnamed,unnamed,unnamed,unnamed,unnamed,unnamed,unnamed,unnamed,unnamed,unnamed,unnamed,unnamed,unnamed,unnamed,unnamed,unnamed,unnamed,unnamed,unnamed,unnamed,unnamed,unnamed,unnamed,unnamed,unnamed,unnamed,unnamed,unnamed,unnamed,unnamed,unnamed,unnamed,unnamed,unnamed,unnamed,unnamed,unnamed…	1810011O10Rik,Abcb10,Actl6a,Adam10,Adamts7,Agap1,Ago2,Ank1,Atmin,Atp6v1c1,Atp8a1,B4galt1,Bcl11a,Bcl2l11,Bcl6b,Bmp4,Bmp7,Btg2,Bub1b,Casp8,Ccbe1,Ccna1,Ccnd1,Ccnd3,Cd33,Cd74,Cdk4,Chd2,Col1a1,Col4a1,Col4a2,Cpeb4,Csf1,Csf2,Ctnna2,Cyb561,Dcbld2,Dcc,Ddrgk1,Dnase2a,Dnmt1,Dph6,Dpy19l3,Egln1,Egln3,Elk4,Epas1,Epor,Esr2,Exoc6,Fam107b,Fam110b,Fam53b,Fancc,Fbxo7,Fbxw7,Fech,Fli1,Foxo3,Gata4,Gata6,Gimap5,Gimap6,…
Mouse Phenotype	MP:0004883	abnormal vascular wound healing	289	1.12206e-12	1.06035e-08	3.66902e-11	1.83407	88.328	162	0.0076501	0.0140308	676	2.5789e-05	0.243706	0.000360512	1.64342	26.7734	44	70	0.00575314	0.628571	unnamed,unnamed,unnamed,unnamed,unnamed,unnamed,unnamed,unnamed,unnamed,unnamed,unnamed,unnamed,unnamed,unnamed,unnamed,unnamed,unnamed,unnamed,unnamed,unnamed,unnamed,unnamed,unnamed,unnamed,unnamed,unnamed,unnamed,unnamed,unnamed,unnamed,unnamed,unnamed,unnamed,unnamed,unnamed,unnamed,unnamed,unnamed,unnamed,unnamed,unnamed,unnamed,unnamed,unnamed,unnamed,unnamed,unnamed,unnamed,unnamed,unnamed…	Abhd2,Acvrl1,Adamts7,Apoa1,Ccr2,Ceacam1,Comp,Csrp1,Csrp2,Cx3cr1,Egr1,Eln,Esr1,F3,Gja1,Gnaq,Igf1r,Il1b,Il1rn,Irf1,Irs1,Irs2,Klf5,Lep,Lpl,Lrp1,Map3k1,Mmp11,Ncf1,Nos1,Nos2,Nov,Prkcb,Ptges,Rras,Scarb1,Serpind1,Smad3,Sorl1,Stmn1,Tlr3,Tlr4,Uhmk1,Zeb1
Mouse Phenotype	MP:0002916	increased synaptic depression	290	1.17931e-12	1.11444e-08	3.84291e-11	2.42506	34.226	83	0.00296431	0.00718864	2167	0.0139273	1	0.0607351	1.69945	7.64953	13	20	0.00169979	0.65	unnamed,unnamed,unnamed,unnamed,unnamed,unnamed,unnamed,unnamed,unnamed,unnamed,unnamed,unnamed,unnamed,unnamed,unnamed,unnamed,unnamed,unnamed,unnamed,unnamed,unnamed,unnamed,unnamed,unnamed,unnamed,unnamed,unnamed,unnamed,unnamed,unnamed,unnamed,unnamed,unnamed,unnamed,unnamed,unnamed,unnamed,unnamed,unnamed,unnamed,unnamed,unnamed,unnamed,unnamed,unnamed,unnamed,unnamed,unnamed,unnamed,unnamed…	Elfn1,Kcnma1,Pip5k1c,Psen1,Rab3a,Sh3gl2,Sh3gl3,Syn1,Syn2,Syn3,Synj1,Syt1,Uchl1
Mouse Phenotype	MP:0013821	abnormal cerebral artery morphology	291	1.43786e-12	1.35878e-08	4.66933e-11	3.00282	18.9821	57	0.00164405	0.00493678	3907	0.11415	1	0.276099	1.35956	9.56191	13	25	0.00169979	0.52	unnamed,unnamed,unnamed,unnamed,unnamed,unnamed,unnamed,unnamed,unnamed,unnamed,unnamed,unnamed,unnamed,unnamed,unnamed,unnamed,unnamed,unnamed,unnamed,unnamed,unnamed,unnamed,unnamed,unnamed,unnamed,unnamed,unnamed,unnamed,unnamed,unnamed,unnamed,unnamed,unnamed,unnamed,unnamed,unnamed,unnamed,unnamed,unnamed,unnamed,unnamed,unnamed,unnamed,unnamed,unnamed,unnamed,unnamed,unnamed,unnamed,unnamed…	Adamts3,Adcy9,Atg16l1,Cmip,Cyp11a1,H13,Mfsd7c,Mybphl,Nsun2,Prrc2b,Pth1r,Sh3pxd2a,Trappc9
Mouse Phenotype	MP:0003960	increased lean body mass	292	1.52653e-12	1.44257e-08	4.94031e-11	1.57311	172.27	271	0.0149203	0.0234713	994	0.000344567	1	0.00327582	1.34688	63.1086	85	165	0.011114	0.515151	unnamed,unnamed,unnamed,unnamed,unnamed,unnamed,unnamed,unnamed,unnamed,unnamed,unnamed,unnamed,unnamed,unnamed,unnamed,unnamed,unnamed,unnamed,unnamed,unnamed,unnamed,unnamed,unnamed,unnamed,unnamed,unnamed,unnamed,unnamed,unnamed,unnamed,unnamed,unnamed,unnamed,unnamed,unnamed,unnamed,unnamed,unnamed,unnamed,unnamed,unnamed,unnamed,unnamed,unnamed,unnamed,unnamed,unnamed,unnamed,unnamed,unnamed…	Abcb11,Acot13,Adpgk,Afap1l2,Ankrd26,Ankrd9,Bhlhe40,Bscl2,Bsx,Bzw2,Cand2,Car7,Cavin1,Cel,Chn1,Cmtm5,Col1a1,Cyp20a1,Dbn1,Dll1,Dnajc7,Dynlrb2,Elmod1,Elovl6,Enc1,Erp44,Esrra,Far2,Fbxo31,Fcrls,Foxa2,Fto,G0s2,Gpr21,Gpr22,Grb10,Gsk3a,H1fx,H2-M5,Htr1b,Il12rb1,Iqce,Izumo1r,Lep,Mapt,Mc4r,Mchr1,Med13,Mettl24,Mrap2,Mstn,Neurog3,Nos1ap,Ntrk2,Pbx3,Pcdh18,Pkp4,Pla2g16,Pnlip,Pomc,Prdm10,Ptpn11,Rai1,Rimklb,Rnf10,…
Mouse Phenotype	MP:0001577	anemia	293	1.63506e-12	1.54513e-08	5.27348e-11	1.36935	384.124	526	0.033269	0.0455569	573	9.24812e-06	0.0873947	0.000152521	1.28936	139.604	180	365	0.0235356	0.493151	unnamed,unnamed,unnamed,unnamed,unnamed,unnamed,unnamed,unnamed,unnamed,unnamed,unnamed,unnamed,unnamed,unnamed,unnamed,unnamed,unnamed,unnamed,unnamed,unnamed,unnamed,unnamed,unnamed,unnamed,unnamed,unnamed,unnamed,unnamed,unnamed,unnamed,unnamed,unnamed,unnamed,unnamed,unnamed,unnamed,unnamed,unnamed,unnamed,unnamed,unnamed,unnamed,unnamed,unnamed,unnamed,unnamed,unnamed,unnamed,unnamed,unnamed…	Abcb10,Abcg5,Actl6a,Acvrl1,Ada,Add2,Add3,Ago2,Agr2,Ank1,Apc,Asxl1,Atf2,Bap1,Bcl11a,Bin3,Brd1,Cbfa2t3,Cby1,Ccbe1,Ccna1,Ccnd1,Ccnd3,Cd47,Cd74,Cdk5rap2,Cflar,Chek2,Chordc1,Col1a1,Col4a1,Cp,Crebbp,Ctnnb1,Diaph1,Dicer1,Disc1,Dmtn,Dnase2a,Dnmt1,Dot1l,E2f6,Egr1,Epas1,Epb41,Epor,Erf,Erg,Esr2,Etv6,Exoc6,Fasl,Fcer1g,Fcgr1,Fcgr3,Fech,Fli1,Fn1,Foxo3,Fshr,Gata2,Gimap5,Hck,Hfe2,Hk1,Hlx,Ifnar1,Ifng,Igf2bp1,Ikzf…
Mouse Phenotype	MP:0003009	abnormal cytokine secretion	294	1.6369e-12	1.54687e-08	5.26147e-11	1.27293	666.177	848	0.0576977	0.0734454	651	2.21379e-05	0.209203	0.000321356	1.20043	257.407	309	673	0.0404027	0.459138	unnamed,unnamed,unnamed,unnamed,unnamed,unnamed,unnamed,unnamed,unnamed,unnamed,unnamed,unnamed,unnamed,unnamed,unnamed,unnamed,unnamed,unnamed,unnamed,unnamed,unnamed,unnamed,unnamed,unnamed,unnamed,unnamed,unnamed,unnamed,unnamed,unnamed,unnamed,unnamed,unnamed,unnamed,unnamed,unnamed,unnamed,unnamed,unnamed,unnamed,unnamed,unnamed,unnamed,unnamed,unnamed,unnamed,unnamed,unnamed,unnamed,unnamed…	Abca1,Abcg1,Abi2,Adora2b,Adrb2,Aim2,Anxa5,Apc,Arhgef2,Arhgef6,Arid1a,Atf2,Atg16l1,Atg7,Batf,Bcl2l1,Bhlhe40,Birc3,C3ar1,Cabin1,Cacnb3,Cacnb4,Cadm1,Cblb,Ccdc88b,Ccl17,Ccl2,Ccr2,Cd276,Cd28,Cd44,Cd5,Cd6,Cd74,Cd84,Ceacam1,Cebpb,Cish,Clic4,Clnk,Cmah,Col10a1,Cops8,Coro1a,Cox10,Cry2,Ctla4,Ctss,Def6,Dgkz,Dlg1,Dmd,Dock2,Drosha,Dtx1,Dusp1,Dusp10,Dusp4,E2f1,Efs,Enpp3,Eomes,Ephb6,F3,Fads1,Fbxo11,Fcer1g,Fcmr,F…
Mouse Phenotype	MP:0002980	abnormal postural reflex	295	1.70668e-12	1.61282e-08	5.46717e-11	1.44193	276.018	398	0.0239059	0.0344708	348	1.80617e-07	0.00170683	4.90468e-06	1.53499	59.2839	91	155	0.0118985	0.587097	unnamed,unnamed,unnamed,unnamed,unnamed,unnamed,unnamed,unnamed,unnamed,unnamed,unnamed,unnamed,unnamed,unnamed,unnamed,unnamed,unnamed,unnamed,unnamed,unnamed,unnamed,unnamed,unnamed,unnamed,unnamed,unnamed,unnamed,unnamed,unnamed,unnamed,unnamed,unnamed,unnamed,unnamed,unnamed,unnamed,unnamed,unnamed,unnamed,unnamed,unnamed,unnamed,unnamed,unnamed,unnamed,unnamed,unnamed,unnamed,unnamed,unnamed…	Aplp2,App,Arntl,Atp2a2,Atp2b2,Auts2,B4galnt1,Bdnf,Bsn,Cacna1a,Cacna1i,Cacnb4,Cacng2,Ccl2,Ccl3,Chd7,Chn1,Dab1,Drd1,Dst,Eml1,En1,En2,Epha10,Eps8,Faah,Foxa2,Gabrg2,Galc,Gli1,Gli2,Glra1,Gnao1,Gnb5,Grid2,Grik4,Grin1,Grm1,Grm7,Hexb,Hoxb1,Inpp4a,Itpr1,Kcne1,Kcnj10,Kcnj6,Kcnq1,Lmx1a,Map2k4,Mcoln3,Mog,Myo5a,Napa,Ndufs4,Nf2,Nlgn3,Npy2r,Nr4a2,Ntn1,Ntrk2,Pbx3,Pcdh15,Pkp4,Pmp22,Postn,Pou4f1,Pparg,Prdm14,Prepl…
Mouse Phenotype	MP:0000854	abnormal cerebellum development	296	1.78695e-12	1.68867e-08	5.70496e-11	1.4229	298.686	425	0.0258692	0.0368093	132	1.71844e-12	1.62393e-08	1.23025e-10	1.72627	59.6663	103	156	0.0134676	0.660256	unnamed,unnamed,unnamed,unnamed,unnamed,unnamed,unnamed,unnamed,unnamed,unnamed,unnamed,unnamed,unnamed,unnamed,unnamed,unnamed,unnamed,unnamed,unnamed,unnamed,unnamed,unnamed,unnamed,unnamed,unnamed,unnamed,unnamed,unnamed,unnamed,unnamed,unnamed,unnamed,unnamed,unnamed,unnamed,unnamed,unnamed,unnamed,unnamed,unnamed,unnamed,unnamed,unnamed,unnamed,unnamed,unnamed,unnamed,unnamed,unnamed,unnamed…	Abl1,Abl2,Abr,Ass1,Astn1,B4galt2,Bcr,Bdnf,Cacna1a,Cadps2,Ccnd1,Cdk5r1,Cdk5r2,Cend1,Cep120,Cers1,Ctnna2,Ctnnb1,Cxcl12,Cxcr4,Dab1,Dag1,Dclk1,En1,En2,Erbb3,Fbxo41,Fbxw7,Fgfr1,Fign,Fkrp,Foxc1,Gas1,Gbx2,Gja1,Gli1,Gli2,Gli3,Gpr37l1,Grid2,Hk2,Id2,Id3,Inpp4a,Itgb1,Kcnj6,Khdrbs1,Khdrbs2,Ldb1,Lgi1,Lhx1,Lhx5,Lmx1a,Lmx1b,Lrp8,Map1b,Mdm2,Mdm4,Mib1,Msx2,Mycn,Myh10,Neurod1,Nfia,Nfib,Npas3,Nr1d1,Nrcam,Ntf3,Ntrk2…
Mouse Phenotype	MP:0001824	abnormal thymus involution	297	1.8077e-12	1.70828e-08	5.75178e-11	2.91948	20.2091	59	0.00175031	0.00510999	4033	0.134327	1	0.31475	1.36952	8.03201	11	21	0.00143829	0.52381	unnamed,unnamed,unnamed,unnamed,unnamed,unnamed,unnamed,unnamed,unnamed,unnamed,unnamed,unnamed,unnamed,unnamed,unnamed,unnamed,unnamed,unnamed,unnamed,unnamed,unnamed,unnamed,unnamed,unnamed,unnamed,unnamed,unnamed,unnamed,unnamed,unnamed,unnamed,unnamed,unnamed,unnamed,unnamed,unnamed,unnamed,unnamed,unnamed,unnamed,unnamed,unnamed,unnamed,unnamed,unnamed,unnamed,unnamed,unnamed,unnamed,unnamed…	Bcl2,Cacna2d2,Cacnb4,Cftr,Dicer1,Hr,Itpkb,Nfatc2,Polg,Smad3,Vdr
Mouse Phenotype	MP:0000952	abnormal CNS glial cell morphology	298	1.87908e-12	1.77573e-08	5.95881e-11	1.34734	427.51	576	0.0370266	0.0498874	160	3.13712e-11	2.96458e-07	1.85286e-09	1.46669	125.452	184	328	0.0240586	0.560976	unnamed,unnamed,unnamed,unnamed,unnamed,unnamed,unnamed,unnamed,unnamed,unnamed,unnamed,unnamed,unnamed,unnamed,unnamed,unnamed,unnamed,unnamed,unnamed,unnamed,unnamed,unnamed,unnamed,unnamed,unnamed,unnamed,unnamed,unnamed,unnamed,unnamed,unnamed,unnamed,unnamed,unnamed,unnamed,unnamed,unnamed,unnamed,unnamed,unnamed,unnamed,unnamed,unnamed,unnamed,unnamed,unnamed,unnamed,unnamed,unnamed,unnamed…	Abcd2,Abl1,Abl2,Abr,Adgrg1,Adrb2,Afg3l1,Aga,Aipl1,App,Arsa,Arsg,Ascl1,Atg7,Atmin,Atoh7,Atp1a3,Atrn,Bcr,Cables1,Cacna2d2,Cadm1,Cast,Ccl2,Ccm2,Cd40lg,Cd81,Cdh2,Cers1,Cers6,Clcn3,Cnp,Cntnap2,Col4a1,Cox10,Cp,Crb2,Csf1,Csf1r,Cx3cr1,Dag1,Dmd,Dnaic1,Drd1,Dync1h1,Eml1,Emx1,Emx2,En1,Enah,Epg5,Esr2,Evl,Fa2h,Fgfr1,Fgfr2,Fig4,Fkrp,Foxc1,Foxg1,Fshr,Galc,Gba,Gja1,Gjb1,Gjc2,Gli3,Gpm6b,Gpr17,Gria2,Grn,Hes1,Hexb,…
Mouse Phenotype	MP:0003878	abnormal ear physiology	299	1.91089e-12	1.80579e-08	6.03944e-11	1.26682	689.918	874	0.0597538	0.0756972	147	1.18496e-11	1.11979e-07	7.61763e-10	1.38294	191.621	265	501	0.0346496	0.528942	unnamed,unnamed,unnamed,unnamed,unnamed,unnamed,unnamed,unnamed,unnamed,unnamed,unnamed,unnamed,unnamed,unnamed,unnamed,unnamed,unnamed,unnamed,unnamed,unnamed,unnamed,unnamed,unnamed,unnamed,unnamed,unnamed,unnamed,unnamed,unnamed,unnamed,unnamed,unnamed,unnamed,unnamed,unnamed,unnamed,unnamed,unnamed,unnamed,unnamed,unnamed,unnamed,unnamed,unnamed,unnamed,unnamed,unnamed,unnamed,unnamed,unnamed…	9930012K11Rik,Aak1,Actg1,Adgrb1,Aff3,Agtpbp1,Aldob,Ankfn1,Ankrd11,Ankrd53,Aqp4,Arsa,Arsb,Ascc2,Asic2,Atad2b,Atf2,Atf6b,Atp2b2,Atp6v0a4,Atp8a2,Atp8b1,Barhl1,Bdnf,Blk,Bmp4,Bmp5,Bphl,Bsn,Cacna1d,Cacng2,Calb1,Cby1,Ccdc92,Cdh23,Chd7,Chrna9,Ckap4,Cldn11,Cldn14,Clec16a,Clic5,Cmah,Coch,Col11a1,Col1a1,Col4a4,Col9a1,Colca2,Csf1,Csf1r,Ctnna2,Ctnnb1,Cys1,Dfna5,Dlx1,Dmd,Dnah5,Dnm1,Dock2,Dtnbp1,Dusp6,Ednra,Edn…
Mouse Phenotype	MP:0002446	abnormal macrophage morphology	300	1.97439e-12	1.8658e-08	6.21932e-11	1.3149	510.306	671	0.0441977	0.0581154	188	1.79702e-10	1.69818e-06	9.03288e-09	1.37111	180.146	247	471	0.032296	0.524416	unnamed,unnamed,unnamed,unnamed,unnamed,unnamed,unnamed,unnamed,unnamed,unnamed,unnamed,unnamed,unnamed,unnamed,unnamed,unnamed,unnamed,unnamed,unnamed,unnamed,unnamed,unnamed,unnamed,unnamed,unnamed,unnamed,unnamed,unnamed,unnamed,unnamed,unnamed,unnamed,unnamed,unnamed,unnamed,unnamed,unnamed,unnamed,unnamed,unnamed,unnamed,unnamed,unnamed,unnamed,unnamed,unnamed,unnamed,unnamed,unnamed,unnamed…	Abcd2,Abcg1,Actl6a,Ada,Adgrf5,Adrb2,Afg3l1,Ank,Ankrd11,Apc,App,Ar,Arg1,Arhgap15,Arsa,Arsg,Atg16l1,Atp1a3,Atp2a2,Atp6v1h,B4galnt1,Bcl2l11,Birc3,Bmp1,C3ar1,C4b,Camk4,Cartpt,Casp8,Cast,Ccbe1,Ccl2,Ccm2,Ccr2,Cd40lg,Cd44,Cd47,Cd81,Cd9,Cebpb,Cers6,Cflar,Cftr,Chek2,Cldn18,Cmah,Cmklr1,Cnp,Col10a1,Col1a1,Cox10,Cp,Csf1,Csf1r,Csf2,Ctbs,Ctnnb1,Ctsk,Ctss,Cx3cl1,Cx3cr1,Cxcl14,Dck,Dcstamp,Ddr1,Dkk2,Dmd,Dnase2a,E…
Mouse Phenotype	MP:0010831	lethality, incomplete penetrance	301	2.37335e-12	2.24282e-08	7.45123e-11	1.35856	399.687	543	0.034617	0.0470293	356	2.0993e-07	0.00198384	5.57259e-06	1.39071	107.858	150	282	0.019613	0.531915	unnamed,unnamed,unnamed,unnamed,unnamed,unnamed,unnamed,unnamed,unnamed,unnamed,unnamed,unnamed,unnamed,unnamed,unnamed,unnamed,unnamed,unnamed,unnamed,unnamed,unnamed,unnamed,unnamed,unnamed,unnamed,unnamed,unnamed,unnamed,unnamed,unnamed,unnamed,unnamed,unnamed,unnamed,unnamed,unnamed,unnamed,unnamed,unnamed,unnamed,unnamed,unnamed,unnamed,unnamed,unnamed,unnamed,unnamed,unnamed,unnamed,unnamed…	Abl1,Ackr3,Apaf1,Arid3a,Atg7,Avil,Baiap2,Cacna1a,Cacna2d2,Camk2a,Cap2,Cby1,Cd44,Cftr,Chd2,Clic4,Cnr1,Colq,Cpeb4,Crim1,Cyp11a1,Daam1,Dab1,Dact1,Dsc3,E2f1,E2f3,Egln1,Egln3,Emx1,En1,En2,Epas1,Epn1,Epn2,Esrrg,Fam46a,Fbxw8,Foxf1,Fut8,Gab1,Gap43,Gapdh,Gata2,Gcm2,Gimap5,Gldc,Gnao1,Gng13,Gpi1,Grhl2,Grid2,Grm7,Hand1,Herc1,Hoxd11,Hs6st1,Id2,Ifih1,Ifng,Igf1r,Igf2bp1,Igf2r,Itgb3,Itsn1,Kat14,Kcmf1,Kcnq2,Kit,K…
Mouse Phenotype	MP:0005293	impaired glucose tolerance	302	2.55086e-12	2.41056e-08	7.98199e-11	1.3474	422.294	569	0.0365749	0.0492811	472	1.75256e-06	0.0165617	3.50884e-05	1.32667	128.895	171	337	0.0223588	0.507418	unnamed,unnamed,unnamed,unnamed,unnamed,unnamed,unnamed,unnamed,unnamed,unnamed,unnamed,unnamed,unnamed,unnamed,unnamed,unnamed,unnamed,unnamed,unnamed,unnamed,unnamed,unnamed,unnamed,unnamed,unnamed,unnamed,unnamed,unnamed,unnamed,unnamed,unnamed,unnamed,unnamed,unnamed,unnamed,unnamed,unnamed,unnamed,unnamed,unnamed,unnamed,unnamed,unnamed,unnamed,unnamed,unnamed,unnamed,unnamed,unnamed,unnamed…	Abcc8,Adcyap1r1,Adgrf5,Adipor2,Agap2,Akap5,Akt3,Alb,Aldh1b1,Ank2,Apob,Appl1,Ar,Arfgef3,Arntl,Bad,Baiap2l1,Bscl2,Cacna1d,Cacna1e,Cadps,Cadps2,Cartpt,Cavin1,Ccdc80,Ccl2,Cdkal1,Celf4,Cep19,Chgb,Chrm3,Clec16a,Col1a1,Commd9,Cpe,Crat,Crebbp,Crtc1,Cry2,Csf2,Ctdspl,Cxcl14,Cyp7b1,Depdc5,Dpm2,E2f1,Esr1,Extl3,Fbxo31,Fem1b,Ffar2,Ffar3,Fgl1,Fosl2,Foxo1,Foxo3,Fstl1,Fzd3,Gadd45gip1,Ghrhr,Gipr,Glb1l2,Glis3,Glp1r…
Mouse Phenotype	MP:0011977	abnormal sodium ion homeostasis	303	2.72118e-12	2.57151e-08	8.48684e-11	1.55995	175.646	274	0.0152128	0.0237312	1059	0.000502236	1	0.00448171	1.33955	61.9612	83	162	0.0108525	0.512346	unnamed,unnamed,unnamed,unnamed,unnamed,unnamed,unnamed,unnamed,unnamed,unnamed,unnamed,unnamed,unnamed,unnamed,unnamed,unnamed,unnamed,unnamed,unnamed,unnamed,unnamed,unnamed,unnamed,unnamed,unnamed,unnamed,unnamed,unnamed,unnamed,unnamed,unnamed,unnamed,unnamed,unnamed,unnamed,unnamed,unnamed,unnamed,unnamed,unnamed,unnamed,unnamed,unnamed,unnamed,unnamed,unnamed,unnamed,unnamed,unnamed,unnamed…	Adcy3,Agt,Ajap1,Anxa6,Bach1,Brms1,C9,Cacna1b,Cacna2d3,Camkmt,Ccdc57,Cd84,Cers5,Chek2,Chn1,Cpa2,Cyb5d1,Cyp11a1,Cyp2c44,D1Ertd622e,Dkk1,Dusp4,Dync1i2,Edn1,Ednrb,Elk4,Entpd1,Fam49b,Fkbp9,Gad2,Grin2d,Guca2b,Gys2,H1fx,Hsd11b2,Hsf2,Irf8,Itga8,Kcne1,Kcnj1,Kcnj10,Kif1b,Leprotl1,Mas1,Myl12b,Nacad,Ncald,Ndufa8,Nedd4l,Nfkb1,Nos1,Nos2,Nr3c2,Pax8,Pex26,Pnmt,Pola2,Pou3f3,Pparg,Ptger1,Ramp1,Rnf10,Rxfp2,Scnn1a,S…
Mouse Phenotype	MP:0005017	decreased B cell number	304	2.80389e-12	2.64967e-08	8.71604e-11	1.29327	572.967	741	0.0496247	0.0641781	153	2.25552e-11	2.13146e-07	1.39311e-09	1.38642	183.206	254	479	0.0332113	0.530271	unnamed,unnamed,unnamed,unnamed,unnamed,unnamed,unnamed,unnamed,unnamed,unnamed,unnamed,unnamed,unnamed,unnamed,unnamed,unnamed,unnamed,unnamed,unnamed,unnamed,unnamed,unnamed,unnamed,unnamed,unnamed,unnamed,unnamed,unnamed,unnamed,unnamed,unnamed,unnamed,unnamed,unnamed,unnamed,unnamed,unnamed,unnamed,unnamed,unnamed,unnamed,unnamed,unnamed,unnamed,unnamed,unnamed,unnamed,unnamed,unnamed,unnamed…	1700029H14Rik,Abl1,Ackr3,Actl6a,Adam10,Adgrb1,Adgrg3,Aff1,Akap13,Arhgap17,Arhgef1,Arhgef6,Arid3a,Arid3b,Arntl,Arsg,Asxl1,Atg7,Atmin,Bach2,Bad,Batf,Bcl11a,Bcl2,Bcl2l11,Birc3,Blk,Camkmt,Casp8,Cbfa2t3,Ccdc171,Ccnd3,Cd180,Cd22,Cd24a,Cd28,Cd40,Cd5,Cd6,Cd74,Cd81,Cd84,Cdh17,Cds2,Chrnb2,Chst1,Cmah,Cog6,Col10a1,Coro1a,Crebbp,Csf1,Cux1,Cxcl12,Cxcr4,Cycs,Cyld,Dapp1,Dck,Ddhd1,Dicer1,Dlk1,Dll1,Dmd,Dock10,Dock…
Mouse Phenotype	MP:0010875	increased bone volume	305	2.86419e-12	2.70665e-08	8.87428e-11	1.83034	85.7762	157	0.00742909	0.0135978	670	2.54313e-05	0.240326	0.000358695	1.60895	29.8332	48	78	0.00627615	0.615385	unnamed,unnamed,unnamed,unnamed,unnamed,unnamed,unnamed,unnamed,unnamed,unnamed,unnamed,unnamed,unnamed,unnamed,unnamed,unnamed,unnamed,unnamed,unnamed,unnamed,unnamed,unnamed,unnamed,unnamed,unnamed,unnamed,unnamed,unnamed,unnamed,unnamed,unnamed,unnamed,unnamed,unnamed,unnamed,unnamed,unnamed,unnamed,unnamed,unnamed,unnamed,unnamed,unnamed,unnamed,unnamed,unnamed,unnamed,unnamed,unnamed,unnamed…	Adrb2,Camk4,Ccr2,Cd47,Cebpb,Col1a1,Cry2,Csf1,Ctnnb1,Ctsk,Dicer1,Dkk1,Esrra,Fos,Galnt3,Grem1,Gsk3b,Hcst,Hivep3,Il20ra,Itgb3,Jdp2,Kremen1,Ncor2,Nf1,Nfatc1,Nos1,Nos2,Npy,Npy2r,Per2,Plcg2,Pparg,Ptpre,Rgs12,Riox1,Snx10,Socs2,Spon1,Stat1,Thra,Tmem64,Tnfrsf11a,Tnfsf11,Tyrobp,Vdr,Vhl,Xylt1
Mouse Phenotype	MP:0002408	abnormal double-positive T cell morphology	306	3.69301e-12	3.48989e-08	1.14049e-10	1.4382	271.868	391	0.0235465	0.0338645	1357	0.00182061	1	0.0126785	1.24659	90.6469	113	237	0.0147751	0.476793	unnamed,unnamed,unnamed,unnamed,unnamed,unnamed,unnamed,unnamed,unnamed,unnamed,unnamed,unnamed,unnamed,unnamed,unnamed,unnamed,unnamed,unnamed,unnamed,unnamed,unnamed,unnamed,unnamed,unnamed,unnamed,unnamed,unnamed,unnamed,unnamed,unnamed,unnamed,unnamed,unnamed,unnamed,unnamed,unnamed,unnamed,unnamed,unnamed,unnamed,unnamed,unnamed,unnamed,unnamed,unnamed,unnamed,unnamed,unnamed,unnamed,unnamed…	Ada,Adam10,Aff1,Akt3,Arid5b,Bcl11b,Bcl2,Bcl2l1,Bcl2l11,Bhlhe40,Cacnb4,Cadm1,Cbx4,Ccnd3,Cd40lg,Cd5,Cdkn2a,Chd4,Col10a1,Crebbp,Ctcf,Ctla4,Cux1,Cxcr4,Cyld,Dck,Dnase2a,Dock2,Drosha,Dyrk1a,E2f1,E2f6,Efnb2,Esr1,Esr2,Fbxw7,Fos,Foxo1,Fyn,Gata3,Gba,Grap2,Grb2,Hcls1,Hes1,Hivep3,Hnrnpl,Id3,Ikzf1,Irf1,Itpkb,Kit,Kitl,Klf13,Kmt2e,Lat,Lcp2,Mapk1,Mapk3,Mcl1,Mdm2,Mertk,Msi2,Nfatc1,Nfkb1,Nfkb2,Nfkbia,Nlk,Nmt1,Nmt2…
Mouse Phenotype	MP:0012349	increased susceptibility to induction of seizure by inducing agent	307	3.71997e-12	3.51537e-08	1.14507e-10	1.51753	200.326	304	0.0173503	0.0263295	251	6.48627e-09	6.12952e-05	2.44204e-07	1.71134	42.0724	72	110	0.00941423	0.654546	unnamed,unnamed,unnamed,unnamed,unnamed,unnamed,unnamed,unnamed,unnamed,unnamed,unnamed,unnamed,unnamed,unnamed,unnamed,unnamed,unnamed,unnamed,unnamed,unnamed,unnamed,unnamed,unnamed,unnamed,unnamed,unnamed,unnamed,unnamed,unnamed,unnamed,unnamed,unnamed,unnamed,unnamed,unnamed,unnamed,unnamed,unnamed,unnamed,unnamed,unnamed,unnamed,unnamed,unnamed,unnamed,unnamed,unnamed,unnamed,unnamed,unnamed…	Adk,Akt3,Amph,Ap3m2,Arhgap32,Bhlhe40,Bsn,Cacna1a,Cacna2d2,Cdk5r1,Chrna4,Chrnb2,Cit,Cnr1,Cntn2,Ctnnb1,Elfn1,Eml1,Emx1,Faim2,Fzd9,Gabra1,Gabrg2,Gal,Glra1,Grik4,Grik5,Grin1,Grm5,Grm7,Htr4,Htr7,Impa1,Kcna1,Kcna2,Kcnc2,Kcnh3,Kcnj6,Kcnk2,Kcnq2,Lgi1,Lhx6,Mbnl2,Mbp,Mc2r,Mt1,Neurod2,Neurod6,Nos2,Npy,Npy2r,Nr4a3,Nrp2,Oprd1,Pcmt1,Pdyn,Plaur,Plcb1,Plcl1,Prickle2,Prrt2,Ptpro,Rbfox1,Rbfox3,Ryr2,Scn1a,Slc10a4,S…
Mouse Phenotype	MP:0000781	decreased corpus callosum size	308	3.82384e-12	3.61353e-08	1.17323e-10	1.83498	83.9244	154	0.0072687	0.0133379	1562	0.00357869	1	0.0216508	1.51643	19.1238	29	50	0.00379184	0.58	unnamed,unnamed,unnamed,unnamed,unnamed,unnamed,unnamed,unnamed,unnamed,unnamed,unnamed,unnamed,unnamed,unnamed,unnamed,unnamed,unnamed,unnamed,unnamed,unnamed,unnamed,unnamed,unnamed,unnamed,unnamed,unnamed,unnamed,unnamed,unnamed,unnamed,unnamed,unnamed,unnamed,unnamed,unnamed,unnamed,unnamed,unnamed,unnamed,unnamed,unnamed,unnamed,unnamed,unnamed,unnamed,unnamed,unnamed,unnamed,unnamed,unnamed…	Akt3,Ank2,App,Arhgap5,Cdk5r1,Clip2,Ctnnb1,Dclk1,Emx1,Emx2,Ephb2,Ephb3,Fyn,Fzd3,Gpm6b,Ldlr,Map1b,Map2k4,Map3k12,Mycbp2,Plp1,Robo1,Robo2,Slc12a6,Sox2,Ulk4,Vti1a,Wasf1,Zic2
Mouse Phenotype	MP:0020201	abnormal granulocyte number	309	4.55149e-12	4.30116e-08	1.39196e-10	1.30446	525.121	685	0.0454808	0.0593279	488	2.12611e-06	0.0200917	4.11715e-05	1.2521	208.45	261	545	0.0341266	0.478899	unnamed,unnamed,unnamed,unnamed,unnamed,unnamed,unnamed,unnamed,unnamed,unnamed,unnamed,unnamed,unnamed,unnamed,unnamed,unnamed,unnamed,unnamed,unnamed,unnamed,unnamed,unnamed,unnamed,unnamed,unnamed,unnamed,unnamed,unnamed,unnamed,unnamed,unnamed,unnamed,unnamed,unnamed,unnamed,unnamed,unnamed,unnamed,unnamed,unnamed,unnamed,unnamed,unnamed,unnamed,unnamed,unnamed,unnamed,unnamed,unnamed,unnamed…	1810011O10Rik,3110043O21Rik,Abca1,Abcg1,Actl6a,Ada,Adam10,Agr2,Akna,Alg13,Ank1,Ankrd27,Apc,Arhgap15,Arhgap22,Arhgap25,Armc7,Arntl,Asxl1,B4galnt2,B4galt1,Bach2,Bag3,Bap1,Bcl2l11,Bcl6b,Bcr,C3ar1,C4b,Casp8,Casq2,Ccl2,Ccl3,Ccr2,Ccr3,Cd101,Cd28,Cd34,Cd40,Cd44,Cd47,Cd74,Cdh5,Cebpe,Cerk,Cflar,Cftr,Chst3,Cish,Ciz1,Cmklr1,Col17a1,Col1a1,Col4a3bp,Coro1a,Crebbp,Csf1,Csf1r,Csf2,Csf3r,Csnk1g3,Ctnnb1,Ctss,Cxcl…
Mouse Phenotype	MP:0000830	abnormal diencephalon morphology	310	4.59408e-12	4.34141e-08	1.40045e-10	1.31709	487.438	642	0.0422171	0.0556037	199	4.37849e-10	4.13767e-06	2.07923e-08	1.45065	118.568	172	310	0.0224895	0.554839	unnamed,unnamed,unnamed,unnamed,unnamed,unnamed,unnamed,unnamed,unnamed,unnamed,unnamed,unnamed,unnamed,unnamed,unnamed,unnamed,unnamed,unnamed,unnamed,unnamed,unnamed,unnamed,unnamed,unnamed,unnamed,unnamed,unnamed,unnamed,unnamed,unnamed,unnamed,unnamed,unnamed,unnamed,unnamed,unnamed,unnamed,unnamed,unnamed,unnamed,unnamed,unnamed,unnamed,unnamed,unnamed,unnamed,unnamed,unnamed,unnamed,unnamed…	Actn4,Adamts3,Adcy1,Agtpbp1,Alk,Anxa1,Ap3b1,Apaf1,Arnt2,Arsg,Atrn,Atxn1,B4galt1,Bmp4,Cacna2d2,Cacnb4,Cacng2,Cd40lg,Cdc42,Cdk4,Celsr2,Celsr3,Chd7,Chrnb2,Cir1,Cit,Cmip,Col18a1,Coro1c,Ctnnb1,Cycs,Dclk1,Disc1,Dkk1,Dlg5,Dmd,Dmxl2,Dyrk1a,Ebf2,Efna3,Efna5,Egr1,Emx1,Emx2,Eno2,Epha4,Esr1,Fbxw7,Fezf1,Fezf2,Fgf8,Fgfr2,Foxc1,Foxg1,Fshr,Fuz,Fyn,Fzd3,Gal,Gata2,Gbx2,Ghrhr,Gli1,Gli2,Gli3,Gsx1,H13,Hes1,Hhat,Hhex,…
Mouse Phenotype	MP:0011967	increased or absent threshold for auditory brainstem response	311	4.61561e-12	4.36175e-08	1.40249e-10	1.35051	405.773	548	0.035144	0.0474623	444	1.08044e-06	0.0102102	2.29959e-05	1.34438	121.245	163	317	0.0213128	0.514196	unnamed,unnamed,unnamed,unnamed,unnamed,unnamed,unnamed,unnamed,unnamed,unnamed,unnamed,unnamed,unnamed,unnamed,unnamed,unnamed,unnamed,unnamed,unnamed,unnamed,unnamed,unnamed,unnamed,unnamed,unnamed,unnamed,unnamed,unnamed,unnamed,unnamed,unnamed,unnamed,unnamed,unnamed,unnamed,unnamed,unnamed,unnamed,unnamed,unnamed,unnamed,unnamed,unnamed,unnamed,unnamed,unnamed,unnamed,unnamed,unnamed,unnamed…	Aak1,Actg1,Adgrb1,Aff3,Aldob,Ankrd11,Ankrd53,Aqp4,Arsa,Arsb,Ascc2,Atad2b,Atf6b,Atp2b2,Atp6v0a4,Atp8a2,Atp8b1,Barhl1,Blk,Bmp4,Bphl,Cacna1d,Cacng2,Ccdc92,Cdh23,Chd7,Chrna9,Ckap4,Cldn11,Cldn14,Clec16a,Clic5,Coch,Col4a4,Col9a1,Colca2,Cys1,Dfna5,Dlx1,Dmd,Dnm1,Dtnbp1,Ednra,Elmod1,Emx1,Esrrb,Esrrg,Fbxo2,Fbxo41,Fgf8,Fgf9,Fgfr1,Fgfr3,Fnbp1l,Fndc7,Ftsj1,Gas6,Gata2,Gata3,Gipc3,Gjb6,Gjc3,Golga1,Grid2,Hip1r,H…
Mouse Phenotype	MP:0000181	abnormal circulating LDL cholesterol level	312	4.72081e-12	4.46117e-08	1.42986e-10	1.58074	160.684	254	0.0139169	0.021999	717	3.83393e-05	0.362306	0.000505308	1.43616	54.3117	78	142	0.0101987	0.549296	unnamed,unnamed,unnamed,unnamed,unnamed,unnamed,unnamed,unnamed,unnamed,unnamed,unnamed,unnamed,unnamed,unnamed,unnamed,unnamed,unnamed,unnamed,unnamed,unnamed,unnamed,unnamed,unnamed,unnamed,unnamed,unnamed,unnamed,unnamed,unnamed,unnamed,unnamed,unnamed,unnamed,unnamed,unnamed,unnamed,unnamed,unnamed,unnamed,unnamed,unnamed,unnamed,unnamed,unnamed,unnamed,unnamed,unnamed,unnamed,unnamed,unnamed…	Abca1,Adipor2,Angptl3,Ap2a2,Apoa1,Apob,Apobec1,Arntl,Brd7,Cdca8,Cpe,Ctss,Cx3cl1,Cyb561,Dab2,Dbn1,Eif4e3,Esco1,Fam234b,Fasl,Fgg,Fto,Gpr12,Hif1an,Hmgcr,Hsd11b1,Ift140,Kcne3,Kif13b,Kit,Ldlr,Lep,Lipc,Lipg,Lpin1,Lpl,Lrp1,Lrp6,Ltbp1,Miga2,Mrap2,Mta1,Mta3,Ncor1,Nos1,Nos2,Npy2r,Nr1d1,Nr5a2,Nsun2,Ostm1,P2ry13,Pcsk9,Pex3,Pon1,Prkab1,Prkar2b,Prkci,Rai1,Reg3g,Samd4,Sar1b,Scarb1,Scp2,Sec16b,Sirt3,Slc25a21,Slc…
Mouse Phenotype	MP:0003990	decreased neurotransmitter release	313	4.87444e-12	4.60635e-08	1.47168e-10	2.24273	41.0215	92	0.00355288	0.00796813	560	8.0377e-06	0.0759563	0.000135636	1.9609	13.7691	27	36	0.00353033	0.75	unnamed,unnamed,unnamed,unnamed,unnamed,unnamed,unnamed,unnamed,unnamed,unnamed,unnamed,unnamed,unnamed,unnamed,unnamed,unnamed,unnamed,unnamed,unnamed,unnamed,unnamed,unnamed,unnamed,unnamed,unnamed,unnamed,unnamed,unnamed,unnamed,unnamed,unnamed,unnamed,unnamed,unnamed,unnamed,unnamed,unnamed,unnamed,unnamed,unnamed,unnamed,unnamed,unnamed,unnamed,unnamed,unnamed,unnamed,unnamed,unnamed,unnamed…	Adgrl1,Ap3m2,Cacna1a,Cacna2d2,Chrna4,Dlg4,Doc2a,Eef1a2,Emx1,En1,En2,Lmx1b,Mapk8ip2,Nos1,Nrxn2,Nrxn3,Prmt8,Rab3a,Rab3c,Slc17a6,Slc32a1,Slc6a3,Snap25,Syt2,Uchl1,Unc13a,Vamp2
Mouse Phenotype	MP:0002199	abnormal brain commissure morphology	314	4.88623e-12	4.61749e-08	1.47054e-10	1.39147	330.585	460	0.028632	0.0398406	81	4.42376e-15	4.18045e-11	5.16105e-13	1.7578	67.6983	119	177	0.0155596	0.672316	unnamed,unnamed,unnamed,unnamed,unnamed,unnamed,unnamed,unnamed,unnamed,unnamed,unnamed,unnamed,unnamed,unnamed,unnamed,unnamed,unnamed,unnamed,unnamed,unnamed,unnamed,unnamed,unnamed,unnamed,unnamed,unnamed,unnamed,unnamed,unnamed,unnamed,unnamed,unnamed,unnamed,unnamed,unnamed,unnamed,unnamed,unnamed,unnamed,unnamed,unnamed,unnamed,unnamed,unnamed,unnamed,unnamed,unnamed,unnamed,unnamed,unnamed…	Abi2,Akt3,Ank2,Apbb1,Apbb2,App,Arhgap5,Bhlhe22,Cables1,Cd81,Cdk5r1,Celsr3,Chd7,Clcn2,Clip2,Cnp,Cntn2,Cntnap2,Csf1r,Ctnnb1,Dcc,Dclk1,Dmrta2,Ebf1,Efnb2,Egr2,Emx1,Emx2,En1,Enah,Eomes,Epha4,Ephb2,Ephb3,Ext1,Fbxo45,Fezf2,Fgfr1,Fgfr2,Foxc1,Foxg1,Fyn,Fzd3,Galc,Gli3,Gpm6b,Itpr3,Itsn1,Kif1b,Kif3a,Klf7,Ldlr,Lhx5,Lrp2,Macf1,Man2c1,Map1b,Map2,Map2k4,Map3k12,Mapk8ip3,March7,Mbp,Mkl1,Mkl2,Mlc1,Msx1,Mycbp2,Napa…
Mouse Phenotype	MP:0002906	increased susceptibility to pharmacologically induced seizures	315	5.23359e-12	4.94575e-08	1.57008e-10	1.51383	200.155	303	0.0173354	0.0262429	268	1.12131e-08	0.000105964	3.95388e-07	1.70305	41.6899	71	109	0.00928347	0.651376	unnamed,unnamed,unnamed,unnamed,unnamed,unnamed,unnamed,unnamed,unnamed,unnamed,unnamed,unnamed,unnamed,unnamed,unnamed,unnamed,unnamed,unnamed,unnamed,unnamed,unnamed,unnamed,unnamed,unnamed,unnamed,unnamed,unnamed,unnamed,unnamed,unnamed,unnamed,unnamed,unnamed,unnamed,unnamed,unnamed,unnamed,unnamed,unnamed,unnamed,unnamed,unnamed,unnamed,unnamed,unnamed,unnamed,unnamed,unnamed,unnamed,unnamed…	Adk,Akt3,Amph,Ap3m2,Arhgap32,Bhlhe40,Bsn,Cacna1a,Cacna2d2,Cdk5r1,Chrna4,Cit,Cnr1,Cntn2,Ctnnb1,Elfn1,Eml1,Emx1,Faim2,Fzd9,Gabra1,Gabrg2,Gal,Glra1,Grik4,Grik5,Grin1,Grm5,Grm7,Htr4,Htr7,Impa1,Kcna1,Kcna2,Kcnc2,Kcnh3,Kcnj6,Kcnk2,Kcnq2,Lgi1,Lhx6,Mbnl2,Mbp,Mc2r,Mt1,Neurod2,Neurod6,Nos2,Npy,Npy2r,Nr4a3,Nrp2,Oprd1,Pcmt1,Pdyn,Plaur,Plcb1,Plcl1,Prickle2,Prrt2,Ptpro,Rbfox1,Rbfox3,Ryr2,Scn1a,Slc10a4,Slc12a5,…
Mouse Phenotype	MP:0000980	absent hair-down neurons	316	5.3614e-12	5.06652e-08	1.60333e-10	5.89088	4.24385	25	0.00036756	0.00216525	6042	0.382476	1	0.598213	2.61454	0.382476	1	1	0.000130753	1	unnamed,unnamed,unnamed,unnamed,unnamed,unnamed,unnamed,unnamed,unnamed,unnamed,unnamed,unnamed,unnamed,unnamed,unnamed,unnamed,unnamed,unnamed,unnamed,unnamed,unnamed,unnamed,unnamed,unnamed,unnamed	Ntrk2
Mouse Phenotype	MP:0001891	hydroencephaly	317	5.54218e-12	5.23736e-08	1.65216e-10	1.5176	197.021	299	0.017064	0.0258964	758	5.89763e-05	0.557326	0.000735258	1.39549	62.3437	87	163	0.0113755	0.533742	unnamed,unnamed,unnamed,unnamed,unnamed,unnamed,unnamed,unnamed,unnamed,unnamed,unnamed,unnamed,unnamed,unnamed,unnamed,unnamed,unnamed,unnamed,unnamed,unnamed,unnamed,unnamed,unnamed,unnamed,unnamed,unnamed,unnamed,unnamed,unnamed,unnamed,unnamed,unnamed,unnamed,unnamed,unnamed,unnamed,unnamed,unnamed,unnamed,unnamed,unnamed,unnamed,unnamed,unnamed,unnamed,unnamed,unnamed,unnamed,unnamed,unnamed…	Apaf1,Apob,Arl5c,Arl6,Cdc42,Cdkn2a,Cdon,Cep120,Cfap54,Chd7,Col10a1,Col18a1,Col1a1,Crb2,Cycs,D430042O09Rik,Dlg5,Dnah5,Dnaic1,Egln1,Emx1,Enah,Evl,Fgfr2,Fig4,Fkrp,Foxc1,Frem2,Gas8,Gdf7,Gldc,Gli2,Gli3,Golga1,Gtf2ird1,Ick,Jam3,Jhy,Kif3a,Lbr,Lmx1a,Msx1,Myh10,Nampt,Napa,Nek1,Nf2,Nfia,Nfix,Nme5,Nme7,Nr2e1,Nrp2,Ophn1,Pax5,Pdcd6ip,Pkd1,Pomk,Prkci,Prmt3,Ptbp1,Pten,Rbfox2,Rfx4,Rgs4,Rnd3,Rnf7,Rpl31,Scn8a,Smur…
Mouse Phenotype	MP:0003232	abnormal forebrain development	318	6.00611e-12	5.67578e-08	1.78483e-10	1.34338	416.86	560	0.0361042	0.0485017	61	1.87216e-16	1.76919e-12	2.90031e-14	1.6638	96.7665	161	253	0.0210513	0.636364	unnamed,unnamed,unnamed,unnamed,unnamed,unnamed,unnamed,unnamed,unnamed,unnamed,unnamed,unnamed,unnamed,unnamed,unnamed,unnamed,unnamed,unnamed,unnamed,unnamed,unnamed,unnamed,unnamed,unnamed,unnamed,unnamed,unnamed,unnamed,unnamed,unnamed,unnamed,unnamed,unnamed,unnamed,unnamed,unnamed,unnamed,unnamed,unnamed,unnamed,unnamed,unnamed,unnamed,unnamed,unnamed,unnamed,unnamed,unnamed,unnamed,unnamed…	Adam10,Adgrg1,Ago2,Apaf1,Apbb1,Apbb2,Apc,Ascl1,Bcl2l1,Bcor,Boc,Brsk2,Cdc42,Cdh2,Cdk5r1,Cdk5r2,Cdk5rap2,Cdkn2a,Cdon,Celsr3,Chd7,Chn2,Cntn2,Ctbp2,Ctnnb1,Ctnnbip1,Dab1,Dlc1,Dlg3,Dmrta2,Egr1,Eml1,Emx1,Emx2,Enah,Enpp2,Evl,F3,Fbxo45,Fbxw7,Fezf2,Fgf8,Fgfr1,Foxa2,Foxc1,Foxg1,Fzd9,Gbx2,Gja1,Gli2,Gli3,Gsc,Gsx2,H13,Hand1,Hes1,Hes3,Hhat,Hhex,Id2,Id3,Id4,Islr2,Itgb1,Itpr1,Kat6b,Kif20b,Kit,Lamc1,Lef1,Lemd2,Lep…
Mouse Phenotype	MP:0002928	abnormal bile duct morphology	319	6.08922e-12	5.75431e-08	1.80386e-10	1.75567	98.5378	173	0.00853436	0.0149835	1120	0.000660561	1	0.00557348	1.50981	27.1558	41	71	0.00536088	0.577465	unnamed,unnamed,unnamed,unnamed,unnamed,unnamed,unnamed,unnamed,unnamed,unnamed,unnamed,unnamed,unnamed,unnamed,unnamed,unnamed,unnamed,unnamed,unnamed,unnamed,unnamed,unnamed,unnamed,unnamed,unnamed,unnamed,unnamed,unnamed,unnamed,unnamed,unnamed,unnamed,unnamed,unnamed,unnamed,unnamed,unnamed,unnamed,unnamed,unnamed,unnamed,unnamed,unnamed,unnamed,unnamed,unnamed,unnamed,unnamed,unnamed,unnamed…	Actn4,Arl3,Atp8b1,B9d1,Bicc1,Casp8,Celf4,Cftr,Chd2,Coro1c,Cyp11a1,Cys1,Gpbar1,Hes1,Hhex,Jag1,Map3k14,Map3k7,Mybphl,Ncf1,Ndfip1,Nf2,Notch2,Onecut2,Pdx1,Pkd1,Por,Ppp1r8,Pten,Pth1r,Relb,Rtn4rl1,Sav1,Sh3pxd2a,Syt1,Tgfbr2,Thbs1,Tnip1,Traf6,Trappc9,Yap1
Mouse Phenotype	MP:0000861	disorganized barrel cortex	320	6.11229e-12	5.77611e-08	1.80504e-10	2.38835	33.4959	80	0.00290108	0.00692881	1042	0.000456936	1	0.004144	2.61454	3.05981	8	8	0.00104602	1	unnamed,unnamed,unnamed,unnamed,unnamed,unnamed,unnamed,unnamed,unnamed,unnamed,unnamed,unnamed,unnamed,unnamed,unnamed,unnamed,unnamed,unnamed,unnamed,unnamed,unnamed,unnamed,unnamed,unnamed,unnamed,unnamed,unnamed,unnamed,unnamed,unnamed,unnamed,unnamed,unnamed,unnamed,unnamed,unnamed,unnamed,unnamed,unnamed,unnamed,unnamed,unnamed,unnamed,unnamed,unnamed,unnamed,unnamed,unnamed,unnamed,unnamed…	Adcy1,Bhlhe22,Gap43,Grin2b,Lmo4,Neurod6,Plxna4,Rims1
Mouse Phenotype	MP:0004443	absent supraoccipital bone	321	6.20461e-12	5.86336e-08	1.82659e-10	2.95659	18.6025	55	0.00161117	0.00476355	1972	0.00899287	1	0.0430946	2.09163	3.82477	8	10	0.00104602	0.8	unnamed,unnamed,unnamed,unnamed,unnamed,unnamed,unnamed,unnamed,unnamed,unnamed,unnamed,unnamed,unnamed,unnamed,unnamed,unnamed,unnamed,unnamed,unnamed,unnamed,unnamed,unnamed,unnamed,unnamed,unnamed,unnamed,unnamed,unnamed,unnamed,unnamed,unnamed,unnamed,unnamed,unnamed,unnamed,unnamed,unnamed,unnamed,unnamed,unnamed,unnamed,unnamed,unnamed,unnamed,unnamed,unnamed,unnamed,unnamed,unnamed,unnamed…	Apaf1,Foxc2,Gbx2,Gtf2ird1,Hhat,Lmx1b,Scube1,Wdr19
Mouse Phenotype	MP:0002458	abnormal B cell number	322	6.61621e-12	6.25232e-08	1.94171e-10	1.2512	732.899	917	0.0634765	0.0794214	96	3.35997e-14	3.17517e-10	3.30747e-12	1.38245	239.43	331	626	0.0432793	0.528754	unnamed,unnamed,unnamed,unnamed,unnamed,unnamed,unnamed,unnamed,unnamed,unnamed,unnamed,unnamed,unnamed,unnamed,unnamed,unnamed,unnamed,unnamed,unnamed,unnamed,unnamed,unnamed,unnamed,unnamed,unnamed,unnamed,unnamed,unnamed,unnamed,unnamed,unnamed,unnamed,unnamed,unnamed,unnamed,unnamed,unnamed,unnamed,unnamed,unnamed,unnamed,unnamed,unnamed,unnamed,unnamed,unnamed,unnamed,unnamed,unnamed,unnamed…	1700029H14Rik,2310022B05Rik,Abcg1,Abl1,Ackr3,Actl6a,Adam10,Adgrb1,Adgrg3,Adpgk,Aff1,Akap13,Alg13,Ano10,Anxa5,Anxa6,Ar,Arhgap17,Arhgap22,Arhgef1,Arhgef4,Arhgef6,Arid3a,Arid3b,Arntl,Arsg,Asxl1,Atg7,Atmin,Avpr1a,B4galnt2,Bach2,Bad,Bank1,Batf,Bcl11a,Bcl11b,Bcl2,Bcl2l11,Bclaf1,Birc3,Blk,Camkmt,Casp8,Cbfa2t3,Ccdc171,Ccnd3,Ccr2,Cd180,Cd22,Cd24a,Cd28,Cd40,Cd5,Cd6,Cd74,Cd81,Cd84,Cdh17,Cdkn2b,Cds2,Cebpe,Cf…
Mouse Phenotype	MP:0005013	increased lymphocyte cell number	323	7.71863e-12	7.29411e-08	2.25824e-10	1.23629	812.918	1005	0.0704069	0.0870431	300	5.21556e-08	0.000492871	1.6429e-06	1.24404	292.594	364	765	0.0475941	0.475817	unnamed,unnamed,unnamed,unnamed,unnamed,unnamed,unnamed,unnamed,unnamed,unnamed,unnamed,unnamed,unnamed,unnamed,unnamed,unnamed,unnamed,unnamed,unnamed,unnamed,unnamed,unnamed,unnamed,unnamed,unnamed,unnamed,unnamed,unnamed,unnamed,unnamed,unnamed,unnamed,unnamed,unnamed,unnamed,unnamed,unnamed,unnamed,unnamed,unnamed,unnamed,unnamed,unnamed,unnamed,unnamed,unnamed,unnamed,unnamed,unnamed,unnamed…	1810011O10Rik,2310022B05Rik,Abcg1,Abl1,Ada,Adam10,Adcyap1,Adgrb1,Adgrg3,Adpgk,Akap13,Akt3,Alg13,Ank1,Ankrd9,Ano10,Anxa5,Anxa6,Apc,Ar,Arap2,Arhgap17,Arhgap22,Arhgef1,Arhgef4,Arid3b,Arid5b,Arntl,Asxl1,Atg7,Atmin,Avpr1a,B4galt1,B9d2,Bach2,Bank1,Bap1,Bcl11a,Bcl11b,Bcl2,Bcl2l11,Bclaf1,Bhlhe40,Birc3,Cadm1,Casp8,Ccl2,Ccnd3,Ccr2,Cd180,Cd22,Cd28,Cd40,Cd40lg,Cd47,Cd5,Cd6,Cd74,Cdh17,Cdkn2a,Cdkn2b,Cds2,Cebpe…
Mouse Phenotype	MP:0002441	abnormal granulocyte morphology	324	7.86204e-12	7.42962e-08	2.29309e-10	1.29001	561.238	724	0.0486089	0.0627057	441	1.03275e-06	0.00975949	2.21304e-05	1.2528	220.306	276	576	0.0360879	0.479167	unnamed,unnamed,unnamed,unnamed,unnamed,unnamed,unnamed,unnamed,unnamed,unnamed,unnamed,unnamed,unnamed,unnamed,unnamed,unnamed,unnamed,unnamed,unnamed,unnamed,unnamed,unnamed,unnamed,unnamed,unnamed,unnamed,unnamed,unnamed,unnamed,unnamed,unnamed,unnamed,unnamed,unnamed,unnamed,unnamed,unnamed,unnamed,unnamed,unnamed,unnamed,unnamed,unnamed,unnamed,unnamed,unnamed,unnamed,unnamed,unnamed,unnamed…	1810011O10Rik,3110043O21Rik,Abca1,Abcg1,Abcg5,Abhd5,Actl6a,Ada,Adam10,Agr2,Akna,Alg13,Ank1,Ankrd27,Apc,Arhgap15,Arhgap22,Arhgap25,Armc7,Arntl,Asxl1,B4galnt2,B4galt1,Bach2,Bag3,Bap1,Bcl2l11,Bcl6b,Bcr,C3ar1,C4b,Casp8,Casq2,Ccl2,Ccl3,Ccr2,Ccr3,Cd101,Cd28,Cd34,Cd40,Cd44,Cd47,Cd74,Cdh5,Cebpe,Cerk,Cflar,Cftr,Chst15,Chst3,Cish,Ciz1,Cmklr1,Col17a1,Col1a1,Col4a3bp,Coro1a,Crebbp,Csf1,Csf1r,Csf2,Csf3r,Csnk1…
Mouse Phenotype	MP:0013662	decreased myeloid cell number	325	8.07509e-12	7.63096e-08	2.34799e-10	1.34911	399.522	539	0.0346026	0.0466828	908	0.00019697	1	0.00204996	1.23276	147.636	182	386	0.0237971	0.471503	unnamed,unnamed,unnamed,unnamed,unnamed,unnamed,unnamed,unnamed,unnamed,unnamed,unnamed,unnamed,unnamed,unnamed,unnamed,unnamed,unnamed,unnamed,unnamed,unnamed,unnamed,unnamed,unnamed,unnamed,unnamed,unnamed,unnamed,unnamed,unnamed,unnamed,unnamed,unnamed,unnamed,unnamed,unnamed,unnamed,unnamed,unnamed,unnamed,unnamed,unnamed,unnamed,unnamed,unnamed,unnamed,unnamed,unnamed,unnamed,unnamed,unnamed…	Abca1,Abcb10,Abcg5,Actl6a,Adam10,Ago2,Ank1,Arrb1,Asxl1,Atmin,Atp6v1c1,Atp8a1,B4galt1,Bap1,Bcl11a,Bcl2l1,Bcl2l11,Bcr,Bmp4,Bmp7,Brd1,Btg2,Bub1b,Ccbe1,Ccna1,Ccnd1,Ccnd3,Cd40lg,Cd47,Cd74,Cdc42,Cdk4,Cdk5rap2,Cdkn1c,Cfh,Chd2,Chrnb2,Col1a1,Col4a1,Col4a2,Cpeb4,Csnk1a1,Ddrgk1,Diaph3,Dicer1,Dnase2a,Dnmt1,Dph6,Dpy19l3,Dtnbp1,Egln1,Egr1,Elk4,Elmod1,Entpd1,Epas1,Epor,Erg,Etv6,Exoc6,Fam53b,Fancc,Fbxo7,Fech,Fli…
Mouse Phenotype	MP:0001408	stereotypic behavior	326	8.24598e-12	7.79245e-08	2.39032e-10	1.36278	372.032	507	0.0322218	0.0439113	365	2.53992e-07	0.00240022	6.57594e-06	1.44843	81.4675	118	213	0.0154289	0.553991	unnamed,unnamed,unnamed,unnamed,unnamed,unnamed,unnamed,unnamed,unnamed,unnamed,unnamed,unnamed,unnamed,unnamed,unnamed,unnamed,unnamed,unnamed,unnamed,unnamed,unnamed,unnamed,unnamed,unnamed,unnamed,unnamed,unnamed,unnamed,unnamed,unnamed,unnamed,unnamed,unnamed,unnamed,unnamed,unnamed,unnamed,unnamed,unnamed,unnamed,unnamed,unnamed,unnamed,unnamed,unnamed,unnamed,unnamed,unnamed,unnamed,unnamed…	Abr,Adgrl3,Ankfn1,Anks1b,Aplp2,App,Arhgap32,Arhgef11,Arpc3,Ass1,Atf2,Atp2b2,Atp6v0a4,Bcr,Bdnf,Bhlhe22,Bmp4,Bmp5,Brinp1,Btbd9,Cables1,Cacna1a,Cacnb4,Cacng2,Cdh23,Chd7,Chn1,Clcn3,Clic5,Cntn1,Cntnap2,Col17a1,Crebbp,Ctnnb1,Cycs,Cyfip2,Dao,Dlg4,Dst,Efnb2,Elmod1,Emx1,Ephb2,Ephb3,Esrrb,Ext1,Fez1,Fign,Foxa2,Foxg1,Foxi1,Gnao1,Grid2,Grin1,Igf2bp1,Impa1,Jag1,Jakmip1,Kcne1,Kcnma1,Kcnq1,Lhfpl5,Lmx1a,Lrfn2,Lri…
Mouse Phenotype	MP:0002702	decreased circulating free fatty acid level	327	8.9044e-12	8.41466e-08	2.57329e-10	1.72295	105.052	181	0.00909857	0.0156764	957	0.000294559	1	0.00290865	1.41806	45.1322	64	118	0.0083682	0.542373	unnamed,unnamed,unnamed,unnamed,unnamed,unnamed,unnamed,unnamed,unnamed,unnamed,unnamed,unnamed,unnamed,unnamed,unnamed,unnamed,unnamed,unnamed,unnamed,unnamed,unnamed,unnamed,unnamed,unnamed,unnamed,unnamed,unnamed,unnamed,unnamed,unnamed,unnamed,unnamed,unnamed,unnamed,unnamed,unnamed,unnamed,unnamed,unnamed,unnamed,unnamed,unnamed,unnamed,unnamed,unnamed,unnamed,unnamed,unnamed,unnamed,unnamed…	Abhd5,Acaca,Acot13,Angptl3,Apoa2,Aqp11,Asxl1,Bscl2,Cacna2d3,Ccl2,Cebpb,Cenpo,Chn1,Cldn19,Crat,Crebbp,Crhr2,Crtc3,Cyb5d1,Dclk1,Diaph3,Dip2b,Dixdc1,Dpy19l3,Dusp1,Emid1,Fasn,Ffar2,Ffar3,Fgl1,Foxa2,Foxo1,Gab1,Il12rb2,Inppl1,Insr,Irs1,Irs2,Irs3,Kif26b,Lep,Lpin2,Lrp1,Mlxipl,Ncoa3,Npy2r,Nsun2,Osm,Pabpc4,Pla2g16,Pparg,Ppargc1b,Ppm1l,Pten,Rnf169,Rock2,Sar1b,Scap,Scp2,Snrk,Socs3,Sorbs2,Tpgs2,Zzef1
Mouse Phenotype	MP:0001589	abnormal mean corpuscular hemoglobin	328	9.22025e-12	8.71314e-08	2.65645e-10	1.55069	172.181	267	0.0149126	0.0231249	595	1.22299e-05	0.115572	0.000194239	1.40674	70.3757	99	184	0.0129446	0.538044	unnamed,unnamed,unnamed,unnamed,unnamed,unnamed,unnamed,unnamed,unnamed,unnamed,unnamed,unnamed,unnamed,unnamed,unnamed,unnamed,unnamed,unnamed,unnamed,unnamed,unnamed,unnamed,unnamed,unnamed,unnamed,unnamed,unnamed,unnamed,unnamed,unnamed,unnamed,unnamed,unnamed,unnamed,unnamed,unnamed,unnamed,unnamed,unnamed,unnamed,unnamed,unnamed,unnamed,unnamed,unnamed,unnamed,unnamed,unnamed,unnamed,unnamed…	1810011O10Rik,Abca4,Add2,Adgrf5,Ago2,Ank1,Apbb2,Arhgap25,Arid3a,Arpc2,Arrb1,Asxl1,Atg16l1,Atp6v1c1,Bcl11a,Bhlhe40,Btg2,Ccdc57,Cdk5rap2,Cfh,Chn1,Chsy1,Cp,Cpt1c,Cyb5d1,Dkk3,Dlg5,Eif2b2,Elmo1,Elmod1,Epb41,Exoc6,Fam53b,Fbxo7,Foxo3,Ghrhr,Gimap6,Golga7,Gpi1,H2-M5,Hfe2,Hk1,Irf8,Itch,Itgb3,Kcne2,Kdm5c,Kit,Kitl,Klf13,Klf9,Kras,Laptm5,Lgmn,Lmnb1,Lpar6,Lrpprc,Lsm11,Ltbp1,Mst1,Myl12b,Nprl3,Nptn,Nsun2,Osm,Pac…
Mouse Phenotype	MP:0000938	motor neuron degeneration	329	9.68983e-12	9.15689e-08	2.78325e-10	1.89526	71.2302	135	0.00616925	0.0116924	1197	0.000938253	1	0.00740726	1.61323	17.9764	29	47	0.00379184	0.617021	unnamed,unnamed,unnamed,unnamed,unnamed,unnamed,unnamed,unnamed,unnamed,unnamed,unnamed,unnamed,unnamed,unnamed,unnamed,unnamed,unnamed,unnamed,unnamed,unnamed,unnamed,unnamed,unnamed,unnamed,unnamed,unnamed,unnamed,unnamed,unnamed,unnamed,unnamed,unnamed,unnamed,unnamed,unnamed,unnamed,unnamed,unnamed,unnamed,unnamed,unnamed,unnamed,unnamed,unnamed,unnamed,unnamed,unnamed,unnamed,unnamed,unnamed…	Adarb1,Apaf1,Ar,Atp8a2,Bcl2,Cln8,Col25a1,Dctn1,Dync1h1,Eef1a2,Egr3,Erbb3,Faah,Gdap1,Gfra1,Gigyf2,Grm7,Mapt,Olig2,Sacs,Scyl1,Sod1,Sox10,Sox2,Spi1,Uchl1,Vegfa,Vps54,Zfp106
Mouse Phenotype	MP:0000691	enlarged spleen	330	9.71409e-12	9.17982e-08	2.78176e-10	1.29329	545.122	705	0.047213	0.0610601	360	2.22608e-07	0.00210365	5.84347e-06	1.28451	197.74	254	517	0.0332113	0.491296	unnamed,unnamed,unnamed,unnamed,unnamed,unnamed,unnamed,unnamed,unnamed,unnamed,unnamed,unnamed,unnamed,unnamed,unnamed,unnamed,unnamed,unnamed,unnamed,unnamed,unnamed,unnamed,unnamed,unnamed,unnamed,unnamed,unnamed,unnamed,unnamed,unnamed,unnamed,unnamed,unnamed,unnamed,unnamed,unnamed,unnamed,unnamed,unnamed,unnamed,unnamed,unnamed,unnamed,unnamed,unnamed,unnamed,unnamed,unnamed,unnamed,unnamed…	3110043O21Rik,Abca1,Adam10,Add2,Ago2,Aim2,Ank1,Apc,Arhgef1,Ascc2,Asxl1,Atmin,B4galt1,Bap1,Bcl11b,Bcl2,Bcl2l11,Bhlhe40,Bicdl1,Bin3,Birc3,Bscl2,Btbd16,Bub1b,C4b,Casp8,Cbfa2t3,Cblb,Ccnd1,Ccr2,Cd180,Cd28,Cd40,Cd47,Cd5,Cdkn2a,Cdkn2b,Cebpb,Cflar,Cftr,Chd2,Chic2,Chordc1,Cish,Col1a1,Coro1a,Cpt1c,Crebbp,Csf1r,Csf3r,Ctla4,Cycs,Cyld,Dcc,Dck,Def6,Diaph1,Dicer1,Dnase2a,Dnmt1,Drosha,Dtx1,Dusp6,Egln1,Egln3,Egr1…
Mouse Phenotype	MP:0002945	abnormal inhibitory postsynaptic currents	331	9.9224e-12	9.37667e-08	2.83283e-10	1.59444	149.269	238	0.0129282	0.0206132	145	9.27786e-12	8.76758e-08	6.04661e-10	1.9457	32.893	64	86	0.0083682	0.744186	unnamed,unnamed,unnamed,unnamed,unnamed,unnamed,unnamed,unnamed,unnamed,unnamed,unnamed,unnamed,unnamed,unnamed,unnamed,unnamed,unnamed,unnamed,unnamed,unnamed,unnamed,unnamed,unnamed,unnamed,unnamed,unnamed,unnamed,unnamed,unnamed,unnamed,unnamed,unnamed,unnamed,unnamed,unnamed,unnamed,unnamed,unnamed,unnamed,unnamed,unnamed,unnamed,unnamed,unnamed,unnamed,unnamed,unnamed,unnamed,unnamed,unnamed…	Apba1,Apba2,Arhgef9,Bdnf,C1qa,Cacna1a,Cacna1b,Camk4,Chrm1,Chrm3,Chrna2,Chrna4,Chrna9,Cnr1,Cplx2,Cspg5,Dagla,Dclk2,Dnm1,Erc2,Fgf13,Gabbr1,Gabbr2,Gabra1,Gabra4,Gabrd,Gabrg2,Gad1,Gad2,Glra1,Gpr37,Grik1,Kcna1,Kcna2,Lep,Lhx6,Nbea,Nlgn1,Nlgn2,Nlgn3,Nova2,Npas4,Nrxn2,Pacsin1,Pip5k1c,Prnp,Prrt2,Ptf1a,Rims1,Sema6a,Slc32a1,Slc6a1,Slc6a3,Slc6a9,Stx1a,Stx1b,Sv2a,Syn1,Syn3,Syt1,Syt2,Syt5,Tyrobp,Vps54
Mouse Phenotype	MP:0005502	abnormal renal/urinary system physiology	332	1.07502e-11	1.0159e-07	3.05993e-10	1.23536	807.859	998	0.0699687	0.0864369	548	6.70915e-06	0.0634015	0.000115696	1.20588	276.148	333	722	0.0435408	0.461219	unnamed,unnamed,unnamed,unnamed,unnamed,unnamed,unnamed,unnamed,unnamed,unnamed,unnamed,unnamed,unnamed,unnamed,unnamed,unnamed,unnamed,unnamed,unnamed,unnamed,unnamed,unnamed,unnamed,unnamed,unnamed,unnamed,unnamed,unnamed,unnamed,unnamed,unnamed,unnamed,unnamed,unnamed,unnamed,unnamed,unnamed,unnamed,unnamed,unnamed,unnamed,unnamed,unnamed,unnamed,unnamed,unnamed,unnamed,unnamed,unnamed,unnamed…	Abca1,Abcc4,Acads,Actn4,Ada,Adcy3,Adora1,Aga,Agt,Agtr1b,Akap11,Alb,Ank1,Aqp11,Aqp4,Ar,Arid5b,Arsb,Atp2b1,Atp6ap2,Atp6v0a4,Bbs10,Bcl2,Bcl2l11,Bdkrb2,Bicc1,C1qa,C4b,Cald1,Car2,Cavin1,Ccni,Ccr2,Cd180,Cd40,Cd44,Cdc42,Cdk4,Cdkn1c,Cebpb,Cfh,Chga,Chrm3,Chrnb2,Clcn3,Clcnka,Cldn10,Cnnm4,Col4a1,Col4a4,Corin,Coro1a,Crim1,Csf2,Ctbs,Ctnnb1,Ctnnd1,Cx3cr1,Cxcr4,Cyp24a1,Cyp2c44,Cys1,Dab2,Dapk1,Ddc,Ddr1,Dicer1,Di…
Mouse Phenotype	MP:0000245	abnormal erythropoiesis	333	1.12686e-11	1.06489e-07	3.19786e-10	1.55748	166.937	260	0.0144584	0.0225186	659	2.36116e-05	0.22313	0.000338589	1.44067	56.224	81	147	0.010591	0.55102	unnamed,unnamed,unnamed,unnamed,unnamed,unnamed,unnamed,unnamed,unnamed,unnamed,unnamed,unnamed,unnamed,unnamed,unnamed,unnamed,unnamed,unnamed,unnamed,unnamed,unnamed,unnamed,unnamed,unnamed,unnamed,unnamed,unnamed,unnamed,unnamed,unnamed,unnamed,unnamed,unnamed,unnamed,unnamed,unnamed,unnamed,unnamed,unnamed,unnamed,unnamed,unnamed,unnamed,unnamed,unnamed,unnamed,unnamed,unnamed,unnamed,unnamed…	Abcb10,Ago2,Ank1,Ar,Arid3a,Bap1,Bcl11a,Brd1,Cbfa2t3,Ccbe1,Ccnd3,Cd47,Cd74,Cdk5rap2,Cflar,Chd2,Col1a1,Cpeb4,Dnase2a,Dyrk3,Eed,Egr1,Epb41,Epor,Etv6,Exoc6,Fech,Fli1,Gata2,Gimap5,Hk1,Hlx,Hoxb6,Ifng,Ikzf1,Inpp5d,Irf8,Jak3,Jarid2,Kat6a,Kdm1a,Kit,Kitl,Klf13,Kras,Lhx2,Lmo2,Lrfn2,Ncor1,Nfe2l1,Nfkbia,Nprl3,Picalm,Pik3r1,Pim1,Pklr,Ppp2ca,Prkab1,Ptpn11,Ptprc,Rapgef2,Rasa3,Rb1,Rb1cc1,Rela,Relb,Runx1,Senp1,Slc…
Mouse Phenotype	MP:0010902	abnormal pulmonary alveolar sac morphology	334	1.13804e-11	1.07544e-07	3.21989e-10	2.87542	19.4754	56	0.00168677	0.00485017	5269	0.260729	1	0.46762	1.30727	5.35467	7	14	0.000915272	0.5	unnamed,unnamed,unnamed,unnamed,unnamed,unnamed,unnamed,unnamed,unnamed,unnamed,unnamed,unnamed,unnamed,unnamed,unnamed,unnamed,unnamed,unnamed,unnamed,unnamed,unnamed,unnamed,unnamed,unnamed,unnamed,unnamed,unnamed,unnamed,unnamed,unnamed,unnamed,unnamed,unnamed,unnamed,unnamed,unnamed,unnamed,unnamed,unnamed,unnamed,unnamed,unnamed,unnamed,unnamed,unnamed,unnamed,unnamed,unnamed,unnamed,unnamed…	Atxn1,Cby1,Edn2,Fstl1,Pecam1,Rarb,Selenon
Mouse Phenotype	MP:0008171	abnormal mature B cell morphology	335	1.1999e-11	1.1339e-07	3.38479e-10	1.24746	735.093	917	0.0636664	0.0794214	102	7.74438e-14	7.31844e-10	7.17494e-12	1.37586	240.578	331	629	0.0432793	0.526232	unnamed,unnamed,unnamed,unnamed,unnamed,unnamed,unnamed,unnamed,unnamed,unnamed,unnamed,unnamed,unnamed,unnamed,unnamed,unnamed,unnamed,unnamed,unnamed,unnamed,unnamed,unnamed,unnamed,unnamed,unnamed,unnamed,unnamed,unnamed,unnamed,unnamed,unnamed,unnamed,unnamed,unnamed,unnamed,unnamed,unnamed,unnamed,unnamed,unnamed,unnamed,unnamed,unnamed,unnamed,unnamed,unnamed,unnamed,unnamed,unnamed,unnamed…	1700029H14Rik,2310022B05Rik,Abcg1,Abl1,Ackr3,Actl6a,Adam10,Adgrb1,Adgrg3,Adpgk,Aff1,Akap13,Alg13,Ano10,Anxa5,Anxa6,Ar,Arhgap17,Arhgap22,Arhgef1,Arhgef4,Arhgef6,Arid3a,Arid3b,Arntl,Arsg,Asxl1,Atg7,Atmin,Avpr1a,B4galnt2,Bach2,Bad,Bank1,Batf,Bcl11a,Bcl11b,Bcl2,Bcl2l11,Bclaf1,Birc3,Blk,Camkmt,Casp8,Cbfa2t3,Ccdc171,Ccnd3,Ccr2,Cd180,Cd22,Cd24a,Cd28,Cd40,Cd5,Cd6,Cd74,Cd81,Cd84,Cdh17,Cdkn2b,Cds2,Cebpe,Cf…
Mouse Phenotype	MP:0004231	abnormal calcium ion homeostasis	336	1.33276e-11	1.25946e-07	3.74838e-10	1.46017	235.589	344	0.0204044	0.0297939	1106	0.000626128	1	0.00534983	1.31449	69.2283	91	181	0.0118985	0.502762	unnamed,unnamed,unnamed,unnamed,unnamed,unnamed,unnamed,unnamed,unnamed,unnamed,unnamed,unnamed,unnamed,unnamed,unnamed,unnamed,unnamed,unnamed,unnamed,unnamed,unnamed,unnamed,unnamed,unnamed,unnamed,unnamed,unnamed,unnamed,unnamed,unnamed,unnamed,unnamed,unnamed,unnamed,unnamed,unnamed,unnamed,unnamed,unnamed,unnamed,unnamed,unnamed,unnamed,unnamed,unnamed,unnamed,unnamed,unnamed,unnamed,unnamed…	2010300C02Rik,Adgrf5,Alb,Aldh1b1,Ank1,Arhgap22,Arhgef7,Atp2a2,Atp2b1,Atp2b2,Atp6v1h,Cacna1d,Cacna1s,Cacnb3,Cldn10,Cpeb3,Cryba1,Csf1,Cyb561,Cyp24a1,Dbn1,Dmpk,Eef1akmt1,Eif4e3,Enpp1,Fam20c,Fam234b,Fcer1g,Fgf23,Fshr,Galnt3,Gcm2,Gdap1,Gimap6,Gnaq,Gpsm1,Gys2,Itch,Itgb1,Itgb3,Jak1,Kdm4c,Kl,Kptn,Lmnb1,Lrp2,Mrap2,Mrln,Ndfip2,Nfkb1,Nr3c1,Orai1,Piezo1,Pik3cg,Plcl2,Pln,Ppp3ca,Pth1r,Ptk2b,Rapgef4,Rnf144b,Rpi…
Mouse Phenotype	MP:0002664	decreased circulating adrenocorticotropin level	337	1.48381e-11	1.4022e-07	4.16083e-10	2.85489	19.6155	56	0.0016989	0.00485017	2984	0.0438776	1	0.138955	1.74303	4.58972	8	12	0.00104602	0.666667	unnamed,unnamed,unnamed,unnamed,unnamed,unnamed,unnamed,unnamed,unnamed,unnamed,unnamed,unnamed,unnamed,unnamed,unnamed,unnamed,unnamed,unnamed,unnamed,unnamed,unnamed,unnamed,unnamed,unnamed,unnamed,unnamed,unnamed,unnamed,unnamed,unnamed,unnamed,unnamed,unnamed,unnamed,unnamed,unnamed,unnamed,unnamed,unnamed,unnamed,unnamed,unnamed,unnamed,unnamed,unnamed,unnamed,unnamed,unnamed,unnamed,unnamed…	Cpe,Ddx20,Nr3c1,Ntrk2,Pde8b,Pomc,Ptger1,Tbx19
Mouse Phenotype	MP:0004709	cervical vertebrae degeneration	338	1.4905e-11	1.40852e-07	4.16722e-10	10.1859	1.5708	16	0.000136047	0.00138576	6042	0.382476	1	0.598213	2.61454	0.382476	1	1	0.000130753	1	unnamed,unnamed,unnamed,unnamed,unnamed,unnamed,unnamed,unnamed,unnamed,unnamed,unnamed,unnamed,unnamed,unnamed,unnamed,unnamed	Scn8a
Mouse Phenotype	MP:0010492	abnormal atrium endocardium morphology	338	1.4905e-11	1.40852e-07	4.16722e-10	10.1859	1.5708	16	0.000136047	0.00138576	6042	0.382476	1	0.598213	2.61454	0.382476	1	1	0.000130753	1	unnamed,unnamed,unnamed,unnamed,unnamed,unnamed,unnamed,unnamed,unnamed,unnamed,unnamed,unnamed,unnamed,unnamed,unnamed,unnamed	Scn8a
Mouse Phenotype	MP:0004262	abnormal physical strength	340	1.53302e-11	1.44871e-07	4.2609e-10	1.2588	671.277	845	0.0581393	0.0731855	198	4.17016e-10	3.94081e-06	1.99031e-08	1.3551	188.178	255	492	0.033342	0.518293	unnamed,unnamed,unnamed,unnamed,unnamed,unnamed,unnamed,unnamed,unnamed,unnamed,unnamed,unnamed,unnamed,unnamed,unnamed,unnamed,unnamed,unnamed,unnamed,unnamed,unnamed,unnamed,unnamed,unnamed,unnamed,unnamed,unnamed,unnamed,unnamed,unnamed,unnamed,unnamed,unnamed,unnamed,unnamed,unnamed,unnamed,unnamed,unnamed,unnamed,unnamed,unnamed,unnamed,unnamed,unnamed,unnamed,unnamed,unnamed,unnamed,unnamed…	2310022B05Rik,9130011E15Rik,Ackr3,Acta1,Adarb1,Adgrf5,Adipor2,Aff3,Agrn,Agtpbp1,Akna,Aldh1b1,Alk,Alpl,Ank,Aplp2,Apol7a,App,Ar,Arhgap10,Arhgap23,Atp2b2,Bag3,Bicc1,Btbd9,Bves,Cacna1a,Cacna1b,Cacna1s,Camk2b,Camkmt,Cap2,Ccdc92,Ccl2,Cd44,Cdc42,Cdk5r1,Cdk5r2,Cdkal1,Cdon,Chd2,Chsy1,Cldn11,Cnp,Cntn1,Col12a1,Col1a1,Col24a1,Col4a1,Col6a2,Colca2,Comp,Cox4i2,Cpe,Crebbp,Cript,Cx3cr1,Cycs,Dab1,Dag1,Dbi,Des,Dlg…
Mouse Phenotype	MP:0005023	abnormal wound healing	341	1.71119e-11	1.61707e-07	4.74215e-10	1.44926	243.573	353	0.0210959	0.0305734	239	4.40575e-09	4.16343e-05	1.74202e-07	1.5273	77.2602	118	202	0.0154289	0.584158	unnamed,unnamed,unnamed,unnamed,unnamed,unnamed,unnamed,unnamed,unnamed,unnamed,unnamed,unnamed,unnamed,unnamed,unnamed,unnamed,unnamed,unnamed,unnamed,unnamed,unnamed,unnamed,unnamed,unnamed,unnamed,unnamed,unnamed,unnamed,unnamed,unnamed,unnamed,unnamed,unnamed,unnamed,unnamed,unnamed,unnamed,unnamed,unnamed,unnamed,unnamed,unnamed,unnamed,unnamed,unnamed,unnamed,unnamed,unnamed,unnamed,unnamed…	Abhd2,Acvrl1,Adam9,Adamts7,Ankrd1,Anxa1,Apoa1,Arntl,Arpc3,B4galt1,Bnc1,Bub1b,Ccl2,Ccm2l,Ccr2,Cd44,Cdkn2a,Ceacam1,Clec11a,Clic4,Cmah,Col1a1,Col9a1,Comp,Csrp1,Csrp2,Cx3cr1,Daam1,Dact2,Dlc1,Dock2,Dst,Egr1,Eln,Esr1,Esr2,F3,F9,Fgf1,Fn1,Gab1,Gipc1,Gja1,Gjb3,Gnaq,Gpa33,Gsk3b,Gsn,Hspb1,Igf1r,Il1b,Il1rn,Il6ra,Irf1,Irs1,Irs2,Itga3,Itga9,Itgb1,Itgb3,Jdp2,Klf4,Klf5,Lep,Lpl,Lpp,Lrp1,Macf1,Map3k1,Mdk,Mmp11,Mt1…
Mouse Phenotype	MP:0002891	increased insulin sensitivity	342	1.84796e-11	1.74632e-07	5.1062e-10	1.4667	226.359	332	0.0196049	0.0287546	469	1.69987e-06	0.0160637	3.4251e-05	1.45252	68.8458	100	180	0.0130753	0.555556	unnamed,unnamed,unnamed,unnamed,unnamed,unnamed,unnamed,unnamed,unnamed,unnamed,unnamed,unnamed,unnamed,unnamed,unnamed,unnamed,unnamed,unnamed,unnamed,unnamed,unnamed,unnamed,unnamed,unnamed,unnamed,unnamed,unnamed,unnamed,unnamed,unnamed,unnamed,unnamed,unnamed,unnamed,unnamed,unnamed,unnamed,unnamed,unnamed,unnamed,unnamed,unnamed,unnamed,unnamed,unnamed,unnamed,unnamed,unnamed,unnamed,unnamed…	Agap2,Akap5,Angptl2,Appl2,Arntl,Arrdc3,Atf2,Atf6,Cacna1d,Cadps,Cadps2,Ccdc3,Ccl2,Cebpb,Chrm3,Cnr1,Col1a1,Creb5,Crebbp,Crhr2,Crtc3,Cry2,Cxcl14,Degs1,E2f1,Elovl6,Esr2,Fabp5,Foxa2,Foxo6,G0s2,Gab1,Gcg,Gpr21,Gpr68,Grb10,Grb14,Gsk3a,Hif1an,Hmga1,Igf1r,Inppl1,Insr,Irs2,Irx3,Kcna3,Kl,Lep,Lrp6,Mapk8,Mapk8ip1,Mapk9,Mark2,Mark4,Mgll,Mstn,Myf5,Ncoa3,Ncor1,Ncor2,Neurog3,Nln,Noct,Nos2,Nuak1,Oma1,Pbx1,Pde10a,Pd…
Mouse Phenotype	MP:0002459	abnormal B cell physiology	343	1.89603e-11	1.79175e-07	5.22375e-10	1.26085	655.905	827	0.056808	0.0716265	514	3.28727e-06	0.0310647	6.04371e-05	1.22383	251.669	308	658	0.040272	0.468085	unnamed,unnamed,unnamed,unnamed,unnamed,unnamed,unnamed,unnamed,unnamed,unnamed,unnamed,unnamed,unnamed,unnamed,unnamed,unnamed,unnamed,unnamed,unnamed,unnamed,unnamed,unnamed,unnamed,unnamed,unnamed,unnamed,unnamed,unnamed,unnamed,unnamed,unnamed,unnamed,unnamed,unnamed,unnamed,unnamed,unnamed,unnamed,unnamed,unnamed,unnamed,unnamed,unnamed,unnamed,unnamed,unnamed,unnamed,unnamed,unnamed,unnamed…	Abl1,Ada,Adcy9,Adgrg3,Akap13,Apobec3,Arhgef1,Arhgef4,Arhgef6,Arid3a,Arntl,Atmin,Avpr1a,Bach2,Bad,Bank1,Batf,Bbx,Bcl11a,Bcl2,Bcl2l1,Bcl2l11,Bhlhe40,Birc3,Bub1b,C3ar1,Cabin1,Cacnb4,Casp8,Ccdc171,Ccl2,Ccnd3,Ccr2,Cd180,Cd22,Cd28,Cd300c2,Cd37,Cd40,Cd40lg,Cd6,Cd74,Cd81,Cd83,Cd84,Cdh17,Cebpb,Chrna4,Chrnb2,Cmah,Col17a1,Col1a1,Crtc1,Csf2,Ctla4,Ctnnbl1,Ctss,Cxcl12,Cxcr4,Cyld,Cyp7b1,Dapp1,Dck,Def6,Dicer1,Dk…
Mouse Phenotype	MP:0001396	unidirectional circling	344	2.05813e-11	1.94493e-07	5.65387e-10	2.71468	22.1021	60	0.00191426	0.0051966	1610	0.00414546	1	0.0243321	2.13917	4.20724	9	11	0.00117678	0.818182	unnamed,unnamed,unnamed,unnamed,unnamed,unnamed,unnamed,unnamed,unnamed,unnamed,unnamed,unnamed,unnamed,unnamed,unnamed,unnamed,unnamed,unnamed,unnamed,unnamed,unnamed,unnamed,unnamed,unnamed,unnamed,unnamed,unnamed,unnamed,unnamed,unnamed,unnamed,unnamed,unnamed,unnamed,unnamed,unnamed,unnamed,unnamed,unnamed,unnamed,unnamed,unnamed,unnamed,unnamed,unnamed,unnamed,unnamed,unnamed,unnamed,unnamed…	Btbd9,Chn1,Gnao1,Kcne1,Kcnma1,Nf1,Pten,Slc12a2,Tshr
Mouse Phenotype	MP:0002001	blindness	345	2.08521e-11	1.97052e-07	5.71166e-10	2.37088	32.4774	77	0.00281287	0.00666898	1677	0.00467546	1	0.0263465	1.65587	11.4743	19	30	0.00248431	0.633333	unnamed,unnamed,unnamed,unnamed,unnamed,unnamed,unnamed,unnamed,unnamed,unnamed,unnamed,unnamed,unnamed,unnamed,unnamed,unnamed,unnamed,unnamed,unnamed,unnamed,unnamed,unnamed,unnamed,unnamed,unnamed,unnamed,unnamed,unnamed,unnamed,unnamed,unnamed,unnamed,unnamed,unnamed,unnamed,unnamed,unnamed,unnamed,unnamed,unnamed,unnamed,unnamed,unnamed,unnamed,unnamed,unnamed,unnamed,unnamed,unnamed,unnamed…	Cdkn2a,Clcn3,Cln8,Ctnnb1,Dag1,F3,Mertk,Ndufs4,Nr2e1,Pax6,Pde6b,Ppt1,Rela,Sdccag8,Slc17a7,Slc24a1,Slc4a3,Tnfrsf1a,Tyro3
Mouse Phenotype	MP:0003407	abnormal central nervous system regeneration	346	2.21745e-11	2.09549e-07	6.05633e-10	4.56471	6.57216	30	0.000569215	0.0025983	1610	0.00414546	1	0.0243321	2.13917	4.20724	9	11	0.00117678	0.818182	unnamed,unnamed,unnamed,unnamed,unnamed,unnamed,unnamed,unnamed,unnamed,unnamed,unnamed,unnamed,unnamed,unnamed,unnamed,unnamed,unnamed,unnamed,unnamed,unnamed,unnamed,unnamed,unnamed,unnamed,unnamed,unnamed,unnamed,unnamed,unnamed,unnamed	Avil,Nos2,Ptprf,Ptprs,Rtn4,Rtn4r,Rtn4rl1,Rtn4rl2,Tnfrsf1a
Mouse Phenotype	MP:0001413	abnormal response to new environment	347	2.41354e-11	2.2808e-07	6.5729e-10	1.35875	362.835	493	0.0314251	0.0426988	391	4.41435e-07	0.00417156	1.06689e-05	1.41997	88.7345	126	232	0.0164749	0.543103	unnamed,unnamed,unnamed,unnamed,unnamed,unnamed,unnamed,unnamed,unnamed,unnamed,unnamed,unnamed,unnamed,unnamed,unnamed,unnamed,unnamed,unnamed,unnamed,unnamed,unnamed,unnamed,unnamed,unnamed,unnamed,unnamed,unnamed,unnamed,unnamed,unnamed,unnamed,unnamed,unnamed,unnamed,unnamed,unnamed,unnamed,unnamed,unnamed,unnamed,unnamed,unnamed,unnamed,unnamed,unnamed,unnamed,unnamed,unnamed,unnamed,unnamed…	9930012K11Rik,Aaas,Abca13,Abl2,Adcyap1,Aldob,Apba2,App,Arhgef9,Arsg,Atp1a1,Atxn1,Bcl7a,Bdnf,Brinp1,Btbd16,Cadps2,Car7,Cdh23,Cers6,Chl1,Chrna4,Chrnb2,Ckap5,Ckb,Clcn3,Cnr1,Cplx2,Cxadr,Cyb561,Dact2,Disc1,Dmxl2,Dnmt3a,Drd4,Dst,Dtnbp1,Dync1li1,Dyrk1a,Efna3,Eml2,Emx1,Eno2,Erc2,Esr2,Fgf12,Fosb,Frmd4b,Gabbr1,Gdpd5,Gria1,Gria2,Grid2,Grin1,Grin2a,Grm1,Gsk3a,Gsk3b,Gtf2i,Gtf2ird1,Haao,Hrh1,Htr4,Htr5a,Ifng,Ig…
Mouse Phenotype	MP:0004312	absent pillar cells	348	2.58028e-11	2.43836e-07	7.00679e-10	3.54423	11.286	40	0.000977478	0.0034644	1522	0.00312682	1	0.0194142	2.61454	2.29486	6	6	0.000784519	1	unnamed,unnamed,unnamed,unnamed,unnamed,unnamed,unnamed,unnamed,unnamed,unnamed,unnamed,unnamed,unnamed,unnamed,unnamed,unnamed,unnamed,unnamed,unnamed,unnamed,unnamed,unnamed,unnamed,unnamed,unnamed,unnamed,unnamed,unnamed,unnamed,unnamed,unnamed,unnamed,unnamed,unnamed,unnamed,unnamed,unnamed,unnamed,unnamed,unnamed	Atp2b2,Fgf8,Fgfr3,Foxg1,Pou4f3,Srrm4
Mouse Phenotype	MP:0012072	decreased susceptibility to osteoporosis	349	2.60026e-11	2.45724e-07	7.04081e-10	7.62921	2.49043	19	0.000215696	0.00164559	7330	0.618676	1	0.797612	1.30727	0.764953	1	2	0.000130753	0.5	unnamed,unnamed,unnamed,unnamed,unnamed,unnamed,unnamed,unnamed,unnamed,unnamed,unnamed,unnamed,unnamed,unnamed,unnamed,unnamed,unnamed,unnamed,unnamed	Hivep3
Mouse Phenotype	MP:0005316	abnormal response to tactile stimuli	350	2.80857e-11	2.6541e-07	7.58314e-10	1.54123	169.346	261	0.014667	0.0226052	509	3.10577e-06	0.0293495	5.76612e-05	1.57859	40.5425	64	106	0.0083682	0.603774	unnamed,unnamed,unnamed,unnamed,unnamed,unnamed,unnamed,unnamed,unnamed,unnamed,unnamed,unnamed,unnamed,unnamed,unnamed,unnamed,unnamed,unnamed,unnamed,unnamed,unnamed,unnamed,unnamed,unnamed,unnamed,unnamed,unnamed,unnamed,unnamed,unnamed,unnamed,unnamed,unnamed,unnamed,unnamed,unnamed,unnamed,unnamed,unnamed,unnamed,unnamed,unnamed,unnamed,unnamed,unnamed,unnamed,unnamed,unnamed,unnamed,unnamed…	Adcy1,Arhgef4,B9d1,Brsk2,Cacna1a,Cacna1b,Cckbr,Cdk5r1,Cdk5r2,Cpe,Dlg2,Dst,E2f1,Elmod1,Erbb3,Erbin,Esr1,Esr2,Fam110b,Flnc,Fstl1,Gabbr1,Gabbr2,Gabrr1,Gnaq,Grm7,Hoxb1,Kcnd2,Kdm8,Kif1a,Kif1b,Klf7,Madd,Map1b,Mgll,Musk,Myog,Nbea,Ndufs4,Nos2,Nrg1,Pbx3,Pcsk2,Pdyn,Prokr1,Ptprg,Rb1,Rnf7,Ryr1,Shank3,Slc12a5,Slc17a7,Slc38a10,Slc6a9,Slc7a7,Snap25,Sod1,Sox10,Stac3,Stoml3,Tlr4,Trpv4,Tsc1,Tshz3
Mouse Phenotype	MP:0006133	calcified artery	351	2.87654e-11	2.71833e-07	7.74454e-10	3.14052	14.9657	47	0.00129618	0.00407067	4783	0.173811	1	0.343406	1.39442	5.73715	8	15	0.00104602	0.533333	unnamed,unnamed,unnamed,unnamed,unnamed,unnamed,unnamed,unnamed,unnamed,unnamed,unnamed,unnamed,unnamed,unnamed,unnamed,unnamed,unnamed,unnamed,unnamed,unnamed,unnamed,unnamed,unnamed,unnamed,unnamed,unnamed,unnamed,unnamed,unnamed,unnamed,unnamed,unnamed,unnamed,unnamed,unnamed,unnamed,unnamed,unnamed,unnamed,unnamed,unnamed,unnamed,unnamed,unnamed,unnamed,unnamed,unnamed	Ank,Eln,Enpp1,Fam20a,Fgf23,Galnt3,Kl,Lmna
Mouse Phenotype	MP:0013834	thin hypoglossal nerve	352	2.95691e-11	2.79428e-07	7.93829e-10	3.52766	11.339	40	0.000982067	0.0034644	3354	0.0729057	1	0.205414	1.56872	5.73715	9	15	0.00117678	0.6	unnamed,unnamed,unnamed,unnamed,unnamed,unnamed,unnamed,unnamed,unnamed,unnamed,unnamed,unnamed,unnamed,unnamed,unnamed,unnamed,unnamed,unnamed,unnamed,unnamed,unnamed,unnamed,unnamed,unnamed,unnamed,unnamed,unnamed,unnamed,unnamed,unnamed,unnamed,unnamed,unnamed,unnamed,unnamed,unnamed,unnamed,unnamed,unnamed,unnamed	Actn4,Cmip,Cog6,Cyp11a1,Dbn1,H13,Mfsd7c,Nsun2,Traf6
Mouse Phenotype	MP:0003018	abnormal circulating chloride level	353	3.08672e-11	2.91695e-07	8.26331e-10	1.72426	99.1728	171	0.00858936	0.0148103	1103	0.000594849	1	0.0050964	1.44936	35.1878	51	92	0.00666841	0.554348	unnamed,unnamed,unnamed,unnamed,unnamed,unnamed,unnamed,unnamed,unnamed,unnamed,unnamed,unnamed,unnamed,unnamed,unnamed,unnamed,unnamed,unnamed,unnamed,unnamed,unnamed,unnamed,unnamed,unnamed,unnamed,unnamed,unnamed,unnamed,unnamed,unnamed,unnamed,unnamed,unnamed,unnamed,unnamed,unnamed,unnamed,unnamed,unnamed,unnamed,unnamed,unnamed,unnamed,unnamed,unnamed,unnamed,unnamed,unnamed,unnamed,unnamed…	Adcy9,Adgrb1,Alk,Atp6v0a4,Bicdl1,Cacna1b,Cacna1i,Cdca8,Clvs1,Cpa2,Cul3,Dbn1,Eif4g2,Elk4,Elmod1,Entpd1,Epas1,Gad2,Gmds,Gys2,Hsd11b2,Izumo1r,Kcne1,Kif1b,Klhl3,Mc2r,Mtss1l,Mybpc3,Myl12b,Ndrg4,Nek11,Oxgr1,Pex26,Ppp1r35,Rims3,Rin3,Rnf10,Rnf7,Rxfp2,Rxfp4,Scnn1b,Sesn3,Slc25a4,Slc5a2,Slco1b2,Sptbn2,Srp9,Strn3,Tmem218,Tppp,Wwox
Mouse Phenotype	MP:0012010	parturition failure	354	3.08931e-11	2.9194e-07	8.24689e-10	3.00625	16.632	50	0.0014405	0.0043305	5168	0.256623	1	0.469251	1.49402	2.67733	4	7	0.000523013	0.571429	unnamed,unnamed,unnamed,unnamed,unnamed,unnamed,unnamed,unnamed,unnamed,unnamed,unnamed,unnamed,unnamed,unnamed,unnamed,unnamed,unnamed,unnamed,unnamed,unnamed,unnamed,unnamed,unnamed,unnamed,unnamed,unnamed,unnamed,unnamed,unnamed,unnamed,unnamed,unnamed,unnamed,unnamed,unnamed,unnamed,unnamed,unnamed,unnamed,unnamed,unnamed,unnamed,unnamed,unnamed,unnamed,unnamed,unnamed,unnamed,unnamed,unnamed	Antxr2,Gadd45a,Kalrn,Kcnn3
Mouse Phenotype	MP:0005423	abnormal somatic nervous system physiology	355	3.15498e-11	2.98146e-07	8.39847e-10	1.66647	115.213	192	0.00997865	0.0166291	5309	0.264858	1	0.471447	1.10252	31.7456	35	83	0.00457636	0.421687	unnamed,unnamed,unnamed,unnamed,unnamed,unnamed,unnamed,unnamed,unnamed,unnamed,unnamed,unnamed,unnamed,unnamed,unnamed,unnamed,unnamed,unnamed,unnamed,unnamed,unnamed,unnamed,unnamed,unnamed,unnamed,unnamed,unnamed,unnamed,unnamed,unnamed,unnamed,unnamed,unnamed,unnamed,unnamed,unnamed,unnamed,unnamed,unnamed,unnamed,unnamed,unnamed,unnamed,unnamed,unnamed,unnamed,unnamed,unnamed,unnamed,unnamed…	Atp2b2,Bsn,Cacna1d,Cdh23,Chd7,Chrna9,Cntn2,Dbx1,Egr3,Ffar3,Gjb6,Gnat3,Gng13,Gucy1b2,Hpn,Kcnma1,Kcnt1,Nrp2,Pax8,Pbx3,Pcdh15,Pdzd7,Pirt,Pls1,Psap,Rfx3,Runx1,Slc12a5,Slc24a4,Slc26a5,Tas1r2,Tecta,Thra,Thrb,Trpm3
Mouse Phenotype	MP:0001076	abnormal hypoglossal nerve morphology	356	3.33457e-11	3.15116e-07	8.85158e-10	2.02752	52.7739	107	0.00457075	0.00926728	2444	0.0216878	1	0.0838583	1.43177	16.064	23	42	0.00300732	0.547619	unnamed,unnamed,unnamed,unnamed,unnamed,unnamed,unnamed,unnamed,unnamed,unnamed,unnamed,unnamed,unnamed,unnamed,unnamed,unnamed,unnamed,unnamed,unnamed,unnamed,unnamed,unnamed,unnamed,unnamed,unnamed,unnamed,unnamed,unnamed,unnamed,unnamed,unnamed,unnamed,unnamed,unnamed,unnamed,unnamed,unnamed,unnamed,unnamed,unnamed,unnamed,unnamed,unnamed,unnamed,unnamed,unnamed,unnamed,unnamed,unnamed,unnamed…	Actn4,Adarb1,Atg16l1,Cir1,Cln8,Cmip,Cog6,Ctnnb1,Cyp11a1,Dbn1,H13,Hrk,Lhx3,Mfsd7c,Nrg1,Nsun2,Prrc2b,Rara,Rarb,Sall3,Sh3pxd2a,Slc20a2,Traf6
Mouse Phenotype	MP:0003462	abnormal response to novel odor	357	3.62385e-11	3.42454e-07	9.59254e-10	2.75681	20.6761	57	0.00179076	0.00493678	3545	0.0793511	1	0.211528	1.6638	4.20724	7	11	0.000915272	0.636364	unnamed,unnamed,unnamed,unnamed,unnamed,unnamed,unnamed,unnamed,unnamed,unnamed,unnamed,unnamed,unnamed,unnamed,unnamed,unnamed,unnamed,unnamed,unnamed,unnamed,unnamed,unnamed,unnamed,unnamed,unnamed,unnamed,unnamed,unnamed,unnamed,unnamed,unnamed,unnamed,unnamed,unnamed,unnamed,unnamed,unnamed,unnamed,unnamed,unnamed,unnamed,unnamed,unnamed,unnamed,unnamed,unnamed,unnamed,unnamed,unnamed,unnamed…	Arhgap32,Cntnap2,Dbx1,Gnal,Pten,Slc6a3,Tsc1
Mouse Phenotype	MP:0006386	absent somites	358	3.65587e-11	3.45479e-07	9.65027e-10	2.06373	49.425	102	0.00428071	0.00883423	2605	0.0246406	1	0.0893874	1.38731	18.7414	26	49	0.00339958	0.530612	unnamed,unnamed,unnamed,unnamed,unnamed,unnamed,unnamed,unnamed,unnamed,unnamed,unnamed,unnamed,unnamed,unnamed,unnamed,unnamed,unnamed,unnamed,unnamed,unnamed,unnamed,unnamed,unnamed,unnamed,unnamed,unnamed,unnamed,unnamed,unnamed,unnamed,unnamed,unnamed,unnamed,unnamed,unnamed,unnamed,unnamed,unnamed,unnamed,unnamed,unnamed,unnamed,unnamed,unnamed,unnamed,unnamed,unnamed,unnamed,unnamed,unnamed…	Amn,Cer1,Dctn1,Ddx11,Dnmt1,Dnmt3a,Fgf8,Fgfr1,Fn1,Foxc1,Foxc2,Hsd17b12,Lrp6,Map4k4,Mdm4,Mthfd1,Prkci,Ptk2,Qk,Rac1,Scx,T,Tcf7l1,Tead1,Tead2,Tmem163
Mouse Phenotype	MP:0000099	absent vomer bone	359	3.76069e-11	3.55385e-07	9.89931e-10	3.89284	8.99086	35	0.000778699	0.00303135	5636	0.326953	1	0.548209	1.74303	1.14743	2	3	0.000261506	0.666667	unnamed,unnamed,unnamed,unnamed,unnamed,unnamed,unnamed,unnamed,unnamed,unnamed,unnamed,unnamed,unnamed,unnamed,unnamed,unnamed,unnamed,unnamed,unnamed,unnamed,unnamed,unnamed,unnamed,unnamed,unnamed,unnamed,unnamed,unnamed,unnamed,unnamed,unnamed,unnamed,unnamed,unnamed,unnamed	Apaf1,Mn1
Mouse Phenotype	MP:0012065	increased astrocyte number	360	3.91468e-11	3.69937e-07	1.0276e-09	1.60392	136.541	219	0.0118258	0.0189676	960	0.000300793	1	0.00296093	1.39847	49.3395	69	129	0.00902197	0.534884	unnamed,unnamed,unnamed,unnamed,unnamed,unnamed,unnamed,unnamed,unnamed,unnamed,unnamed,unnamed,unnamed,unnamed,unnamed,unnamed,unnamed,unnamed,unnamed,unnamed,unnamed,unnamed,unnamed,unnamed,unnamed,unnamed,unnamed,unnamed,unnamed,unnamed,unnamed,unnamed,unnamed,unnamed,unnamed,unnamed,unnamed,unnamed,unnamed,unnamed,unnamed,unnamed,unnamed,unnamed,unnamed,unnamed,unnamed,unnamed,unnamed,unnamed…	Abcd2,Afg3l1,Aga,App,Arsa,Arsg,Atg7,Atmin,Atp1a3,Atrn,Cast,Cd81,Cers1,Clcn3,Cntnap2,Col4a1,Dag1,Dnaic1,Drd1,Dync1h1,Emx1,En1,Esr2,Fig4,Fshr,Galc,Gba,Gjb1,Gjc2,Gpm6b,Grn,Kcnq3,Lrp1,Lrpap1,Lrrk2,Mapk1,Mapt,Mgat5b,Mlc1,Mog,Mt1,Nat8l,Ndufs4,Nf1,Ntrk2,Pdcd6ip,Pi4k2a,Plp1,Ppt1,Prkab1,Prnp,Psap,Psen1,Ptbp1,Pten,Rb1,Rhot1,S1pr1,Scyl1,Snca,Sod1,Trib2,Tsc1,Tsc2,Tspan2,Uchl1,Vac14,Vegfa,Zfp106
Mouse Phenotype	MP:0001954	respiratory distress	361	3.96756e-11	3.74935e-07	1.0386e-09	1.31621	447.496	589	0.0387577	0.0510133	195	3.61587e-10	3.417e-06	1.75231e-08	1.50598	95.6191	144	250	0.0188285	0.576	unnamed,unnamed,unnamed,unnamed,unnamed,unnamed,unnamed,unnamed,unnamed,unnamed,unnamed,unnamed,unnamed,unnamed,unnamed,unnamed,unnamed,unnamed,unnamed,unnamed,unnamed,unnamed,unnamed,unnamed,unnamed,unnamed,unnamed,unnamed,unnamed,unnamed,unnamed,unnamed,unnamed,unnamed,unnamed,unnamed,unnamed,unnamed,unnamed,unnamed,unnamed,unnamed,unnamed,unnamed,unnamed,unnamed,unnamed,unnamed,unnamed,unnamed…	Abca1,Ackr3,Adamtsl2,Adgrf5,Akap8,Aldh1a1,Arrb1,Ascl1,Cd44,Cdc42,Cdkn1c,Chst11,Col1a1,Col4a1,Cpeb4,Crhr1,Dcc,Dgkd,Dlg1,Dlx2,Dmrt2,Dnah5,E2f3,Ednrb,Efemp2,Egr2,Elk3,Epas1,Fbxw8,Fermt2,Fgf9,Fgfr2,Fgfr3,Fign,Foxa2,Foxf1,Foxg1,Foxp1,Foxp4,Fstl1,Gad1,Gli3,Grem1,Grin1,Grm7,Hck,Hoxa5,Hoxb2,Igf2r,Inppl1,Itga9,Itgb1,Kcnj2,Kl,Klf5,Kras,Lamc2,Ldb3,Lpcat1,Ltbp4,Macf1,Mafb,Man1a2,Mapk8,Mapk9,Mdfi,Mef2c,Mn1,Ms…
Mouse Phenotype	MP:0020151	abnormal circulating non-HDL cholesterol level	362	4.16382e-11	3.93481e-07	1.08697e-09	1.53481	170.054	261	0.0147283	0.0226052	968	0.000319568	1	0.00311975	1.35691	60.4313	82	158	0.0107218	0.518987	unnamed,unnamed,unnamed,unnamed,unnamed,unnamed,unnamed,unnamed,unnamed,unnamed,unnamed,unnamed,unnamed,unnamed,unnamed,unnamed,unnamed,unnamed,unnamed,unnamed,unnamed,unnamed,unnamed,unnamed,unnamed,unnamed,unnamed,unnamed,unnamed,unnamed,unnamed,unnamed,unnamed,unnamed,unnamed,unnamed,unnamed,unnamed,unnamed,unnamed,unnamed,unnamed,unnamed,unnamed,unnamed,unnamed,unnamed,unnamed,unnamed,unnamed…	Abca1,Adipor2,Angptl3,Ap2a2,Apoa1,Apob,Apobec1,Arntl,Brd7,Ccl2,Cdca8,Cpe,Ctss,Cx3cl1,Cyb561,Dab2,Dbn1,Eif4e3,Esco1,Fam234b,Fasl,Fgg,Fn1,Fto,Gpr12,Hif1an,Hmgcr,Hsd11b1,Ift140,Kcne3,Kif13b,Kit,Ldlr,Lep,Lipc,Lipg,Lpin1,Lpl,Lrp1,Lrp6,Ltbp1,Miga2,Mrap2,Mta1,Mta3,Ncor1,Nos1,Nos2,Npy2r,Nr1d1,Nr5a2,Nsun2,Ostm1,P2ry13,Pcsk9,Pex3,Pon1,Ppard,Prkab1,Prkar2b,Prkci,Rai1,Reg3g,Samd4,Sar1b,Scarb1,Scp2,Sec16b,Sir…
Mouse Phenotype	MP:0002797	increased thigmotaxis	363	4.39056e-11	4.14908e-07	1.143e-09	1.60946	133.585	215	0.0115698	0.0186212	729	4.29671e-05	0.406039	0.000556981	1.62935	26.3909	43	69	0.00562238	0.623188	unnamed,unnamed,unnamed,unnamed,unnamed,unnamed,unnamed,unnamed,unnamed,unnamed,unnamed,unnamed,unnamed,unnamed,unnamed,unnamed,unnamed,unnamed,unnamed,unnamed,unnamed,unnamed,unnamed,unnamed,unnamed,unnamed,unnamed,unnamed,unnamed,unnamed,unnamed,unnamed,unnamed,unnamed,unnamed,unnamed,unnamed,unnamed,unnamed,unnamed,unnamed,unnamed,unnamed,unnamed,unnamed,unnamed,unnamed,unnamed,unnamed,unnamed…	Akap11,App,Arhgef9,Cacna1e,Chd6,Cplx2,Csmd1,Ctnnb1,Ddc,Disc1,Dlgap3,Drd1,Efna3,Esr2,Foxq1,Fshr,Gpr26,Grin1,Grin2b,Grn,Gsk3a,Gsk3b,Hcn1,Kcnh5,Kif13a,Lrrc7,Lrrtm1,Nlgn3,Npepps,Ntrk2,Ophn1,Park2,Ppargc1a,Prss12,Pten,Rnf180,Shank3,Slc6a3,Snap25,Spred1,Srr,Tbx1,Wfs1
Mouse Phenotype	MP:0011957	decreased compensatory feeding amount	364	4.59367e-11	4.34102e-07	1.19259e-09	2.79854	19.6531	55	0.00170216	0.00476355	7856	0.685421	1	0.824494	0.922779	6.5021	6	17	0.000784519	0.352941	unnamed,unnamed,unnamed,unnamed,unnamed,unnamed,unnamed,unnamed,unnamed,unnamed,unnamed,unnamed,unnamed,unnamed,unnamed,unnamed,unnamed,unnamed,unnamed,unnamed,unnamed,unnamed,unnamed,unnamed,unnamed,unnamed,unnamed,unnamed,unnamed,unnamed,unnamed,unnamed,unnamed,unnamed,unnamed,unnamed,unnamed,unnamed,unnamed,unnamed,unnamed,unnamed,unnamed,unnamed,unnamed,unnamed,unnamed,unnamed,unnamed,unnamed…	Camkk2,Dbx1,Fasn,Mc3r,Pomc,Rxfp4
Mouse Phenotype	MP:0001263	weight loss	365	4.66136e-11	4.40498e-07	1.20685e-09	1.2864	532.493	685	0.0461192	0.0593279	519	3.36979e-06	0.0318445	6.13575e-05	1.27729	166.76	213	436	0.0278504	0.488532	unnamed,unnamed,unnamed,unnamed,unnamed,unnamed,unnamed,unnamed,unnamed,unnamed,unnamed,unnamed,unnamed,unnamed,unnamed,unnamed,unnamed,unnamed,unnamed,unnamed,unnamed,unnamed,unnamed,unnamed,unnamed,unnamed,unnamed,unnamed,unnamed,unnamed,unnamed,unnamed,unnamed,unnamed,unnamed,unnamed,unnamed,unnamed,unnamed,unnamed,unnamed,unnamed,unnamed,unnamed,unnamed,unnamed,unnamed,unnamed,unnamed,unnamed…	A1cf,Abcc4,Abl1,Actn4,Acvrl1,Adcyap1,Alpl,Anxa1,Apc,App,Arntl,Atg7,Atp2a2,Atp8a2,Atp8b1,Atxn1,B9d2,Bag3,Bcl2,Bcr,Bdnf,Bhlha15,Bub1b,Bub3,Cacnb4,Cavin3,Ccdc3,Ccr2,Cd44,Cd74,Cdc73,Cdkn2a,Cebpb,Cers1,Cftr,Chd2,Chordc1,Chrm3,Cnp,Cnr1,Cntn1,Col10a1,Col19a1,Col1a1,Cox10,Csf1,Cux1,Cycs,Cyld,Dab1,Ddrgk1,Dicer1,Dlx3,Dmbx1,Dmd,Drosha,Dst,Dusp1,Ednrb,Eef1a2,Egf,Egr2,Elf3,Elovl4,En1,Ercc3,Esr1,Esr2,Fat1,Foxq…
Mouse Phenotype	MP:0009141	increased prepulse inhibition	366	4.66953e-11	4.41271e-07	1.20566e-09	1.90579	65.0647	124	0.00563526	0.0107396	4827	0.181746	1	0.35581	1.21162	15.6815	19	41	0.00248431	0.463415	unnamed,unnamed,unnamed,unnamed,unnamed,unnamed,unnamed,unnamed,unnamed,unnamed,unnamed,unnamed,unnamed,unnamed,unnamed,unnamed,unnamed,unnamed,unnamed,unnamed,unnamed,unnamed,unnamed,unnamed,unnamed,unnamed,unnamed,unnamed,unnamed,unnamed,unnamed,unnamed,unnamed,unnamed,unnamed,unnamed,unnamed,unnamed,unnamed,unnamed,unnamed,unnamed,unnamed,unnamed,unnamed,unnamed,unnamed,unnamed,unnamed,unnamed…	Acvr1b,Cyfip2,Disc1,Dnajb12,Efna3,Gabbr1,Grid2,Grin2b,Grm4,Herc3,Irf8,Klhl29,Ppfia2,Rab3ip,Scn9a,Sept5,Setmar,Tmem163,Zfp536
Mouse Phenotype	MP:0009749	enhanced behavioral response to addictive substance	367	4.83635e-11	4.57035e-07	1.24533e-09	1.80876	79.6124	144	0.00689523	0.0124718	587	1.05053e-05	0.0992755	0.000169123	1.79429	19.5063	35	51	0.00457636	0.686275	unnamed,unnamed,unnamed,unnamed,unnamed,unnamed,unnamed,unnamed,unnamed,unnamed,unnamed,unnamed,unnamed,unnamed,unnamed,unnamed,unnamed,unnamed,unnamed,unnamed,unnamed,unnamed,unnamed,unnamed,unnamed,unnamed,unnamed,unnamed,unnamed,unnamed,unnamed,unnamed,unnamed,unnamed,unnamed,unnamed,unnamed,unnamed,unnamed,unnamed,unnamed,unnamed,unnamed,unnamed,unnamed,unnamed,unnamed,unnamed,unnamed,unnamed…	Adgrl3,Alk,Atp1a1,Atp1a3,Cacna1b,Camk4,Cckbr,Chrm4,Chrna4,Cyfip2,Dlg4,Drd4,En1,Fyn,Gabrb1,Gnaz,Homer1,Homer2,Htr6,Kcnc1,Lmo4,Nos1,Nr4a2,Ntrk2,Oprk1,Oprm1,Per2,Pomc,Ppp1r9a,Ppp1r9b,Prkar2b,Prkcg,Slc6a1,Slc6a3,Unc79
Mouse Phenotype	MP:0004152	abnormal circulating iron level	368	5.12789e-11	4.84586e-07	1.31681e-09	1.83756	74.5556	137	0.00645727	0.0118656	1744	0.00615841	1	0.0333698	1.37104	31.3631	43	82	0.00562238	0.52439	unnamed,unnamed,unnamed,unnamed,unnamed,unnamed,unnamed,unnamed,unnamed,unnamed,unnamed,unnamed,unnamed,unnamed,unnamed,unnamed,unnamed,unnamed,unnamed,unnamed,unnamed,unnamed,unnamed,unnamed,unnamed,unnamed,unnamed,unnamed,unnamed,unnamed,unnamed,unnamed,unnamed,unnamed,unnamed,unnamed,unnamed,unnamed,unnamed,unnamed,unnamed,unnamed,unnamed,unnamed,unnamed,unnamed,unnamed,unnamed,unnamed,unnamed…	Asxl1,Boc,Btbd9,Cckbr,Cenpo,Chn1,Cp,Cyb561,Daam1,Ddhd1,Epas1,Evl,Exoc3l2,Exoc6,Fbxo7,Fnip2,Fth1,Fto,Gmds,Hfe2,Ipo11,Kcne2,Kdm7a,Ltbp1,Mapkapk2,Myl4,Myo10,Ndfip2,Nptn,Parvb,Picalm,Prkab1,Prkcz,Prrg2,Slc1a1,Slc25a4,Slc38a10,Sptb,Stat5a,Stat5b,Tamm41,Ttc7,Zfyve28
Mouse Phenotype	MP:0011529	increased placenta intervillous maternal lacunae size	369	5.16383e-11	4.87982e-07	1.32244e-09	6.44496	3.25836	21	0.000282207	0.00181881	5636	0.326953	1	0.548209	1.74303	1.14743	2	3	0.000261506	0.666667	unnamed,unnamed,unnamed,unnamed,unnamed,unnamed,unnamed,unnamed,unnamed,unnamed,unnamed,unnamed,unnamed,unnamed,unnamed,unnamed,unnamed,unnamed,unnamed,unnamed,unnamed	Gcm1,Tgif1
Mouse Phenotype	MP:0001502	abnormal circadian rhythm	370	5.19031e-11	4.90484e-07	1.32563e-09	1.60625	133.852	215	0.0115929	0.0186212	705	3.36278e-05	0.317783	0.000450755	1.5412	36.3353	56	95	0.00732218	0.589474	unnamed,unnamed,unnamed,unnamed,unnamed,unnamed,unnamed,unnamed,unnamed,unnamed,unnamed,unnamed,unnamed,unnamed,unnamed,unnamed,unnamed,unnamed,unnamed,unnamed,unnamed,unnamed,unnamed,unnamed,unnamed,unnamed,unnamed,unnamed,unnamed,unnamed,unnamed,unnamed,unnamed,unnamed,unnamed,unnamed,unnamed,unnamed,unnamed,unnamed,unnamed,unnamed,unnamed,unnamed,unnamed,unnamed,unnamed,unnamed,unnamed,unnamed…	Acvrl1,Adcyap1,Adcyap1r1,Ankfn1,App,Arntl,Atoh7,Atp1a3,Bhlhe40,Bsx,Cadps2,Cnga3,Cry2,Csnk1e,Drd4,Dtnbp1,Fbxl3,Fyn,Gria2,Gtf2ird1,Hrh1,Id2,Kdm1a,Mc4r,Mchr1,Mrap2,Mtnr1a,Naglu,Ncam1,Ncor1,Ngb,Nos2,Npy2r,Nr1d1,Ntrk2,Oma1,Pde6b,Per1,Per2,Per3,Phlpp1,Pou4f3,Pparg,Prokr2,Ptgs1,Rab3a,Rai1,Rgs16,Sik3,Tmem163,Tnfrsf11a,Tnfrsf1a,Tph2,Usp2,Vip,Zfhx3
Mouse Phenotype	MP:0002407	abnormal double-negative T cell morphology	371	5.95164e-11	5.6243e-07	1.51598e-09	1.45277	227.152	330	0.0196737	0.0285813	1298	0.0014759	1	0.0107452	1.29258	68.0808	88	178	0.0115063	0.494382	unnamed,unnamed,unnamed,unnamed,unnamed,unnamed,unnamed,unnamed,unnamed,unnamed,unnamed,unnamed,unnamed,unnamed,unnamed,unnamed,unnamed,unnamed,unnamed,unnamed,unnamed,unnamed,unnamed,unnamed,unnamed,unnamed,unnamed,unnamed,unnamed,unnamed,unnamed,unnamed,unnamed,unnamed,unnamed,unnamed,unnamed,unnamed,unnamed,unnamed,unnamed,unnamed,unnamed,unnamed,unnamed,unnamed,unnamed,unnamed,unnamed,unnamed…	Ada,Aff1,Akt3,Apc,Asxl1,Bcl11a,Bcl11b,Bcl2,Bcl2l11,Bhlhe40,Ccnd3,Cd180,Cd5,Chd4,Chek2,Col10a1,Crebbp,Ctcf,Ctla4,Dck,Dnase2a,Efnb2,Fasl,Fbxw7,Fcer1g,Gata3,Gpr15,Grap2,Havcr1,Hes1,Hnrnpl,Ifng,Ikzf1,Il7,Jak1,Kat6a,Kit,Kitl,Kmt2e,Lag3,Lat,Lcp2,Lrfn2,Malt1,Mcl1,Mdm2,Msi2,Nampt,Nfatc1,Nfatc2,Nfkb2,Nfkbia,Nfkbie,Nmt1,Nmt2,Notch1,Pax1,Pbx1,Plcg1,Ppp4c,Prkch,Prkcq,Prnp,Ptprc,Rag2,Rbpj,Rhoh,Runx1,Sept9,Sma…
Mouse Phenotype	MP:0002463	abnormal neutrophil physiology	372	5.95613e-11	5.62854e-07	1.51305e-09	1.53449	167.483	257	0.0145057	0.0222588	1685	0.0048934	1	0.0274437	1.25557	67.6983	85	177	0.011114	0.480226	unnamed,unnamed,unnamed,unnamed,unnamed,unnamed,unnamed,unnamed,unnamed,unnamed,unnamed,unnamed,unnamed,unnamed,unnamed,unnamed,unnamed,unnamed,unnamed,unnamed,unnamed,unnamed,unnamed,unnamed,unnamed,unnamed,unnamed,unnamed,unnamed,unnamed,unnamed,unnamed,unnamed,unnamed,unnamed,unnamed,unnamed,unnamed,unnamed,unnamed,unnamed,unnamed,unnamed,unnamed,unnamed,unnamed,unnamed,unnamed,unnamed,unnamed…	Alox5ap,Apc,Arhgap15,Arhgap25,Arhgef1,Asxl1,B4galt1,Bcr,C3ar1,Ccl2,Cd44,Cd47,Cdh5,Cebpe,Clcn3,Cmklr1,Csf3r,Cttn,Dock2,Edil3,Entpd1,Fcgr3,Ffar2,Fgg,Flot1,Fut4,G6pc3,Git2,Gja1,Gja5,Gsn,Hck,Hspb1,Hvcn1,Il17ra,Il1b,Inpp5d,Itgam,Jdp2,Kit,Kmt2e,Lcp1,Lyn,Mcl1,Mdk,Mef2c,Mpo,Ncf1,Nlrp12,Nos1,Pde4b,Pde4d,Pik3cd,Pik3cg,Pik3r5,Pik3r6,Plac8,Plau,Plaur,Prex1,Pten,Ptn,Rac1,Rap1a,Rasgrp2,Relb,Selenok,Selplg,Slam…
Mouse Phenotype	MP:0001447	abnormal nest building behavior	373	6.14355e-11	5.80565e-07	1.55648e-09	1.78234	83.598	149	0.00724043	0.0129049	1067	0.000530761	1	0.00470074	1.72009	14.5341	25	38	0.00326883	0.657895	unnamed,unnamed,unnamed,unnamed,unnamed,unnamed,unnamed,unnamed,unnamed,unnamed,unnamed,unnamed,unnamed,unnamed,unnamed,unnamed,unnamed,unnamed,unnamed,unnamed,unnamed,unnamed,unnamed,unnamed,unnamed,unnamed,unnamed,unnamed,unnamed,unnamed,unnamed,unnamed,unnamed,unnamed,unnamed,unnamed,unnamed,unnamed,unnamed,unnamed,unnamed,unnamed,unnamed,unnamed,unnamed,unnamed,unnamed,unnamed,unnamed,unnamed…	Bdnf,Camk2b,Ckb,Cntnap2,Crebbp,Ctnnb1,Emx1,Ext1,Gabrd,Grin1,Gtf2ird1,Hnf4g,Kalrn,Lrrc7,Mapk1,Ndufs4,Npas3,Pex5l,Ppp3r1,Pten,Ptprf,Shank2,Tuba1a,Ube3a,Usp46
Mouse Phenotype	MP:0000832	abnormal thalamus morphology	374	6.60945e-11	6.24593e-07	1.67004e-09	1.59402	137.389	219	0.0118993	0.0189676	467	1.66145e-06	0.0157007	3.36204e-05	1.73075	27.1558	47	71	0.0061454	0.661972	unnamed,unnamed,unnamed,unnamed,unnamed,unnamed,unnamed,unnamed,unnamed,unnamed,unnamed,unnamed,unnamed,unnamed,unnamed,unnamed,unnamed,unnamed,unnamed,unnamed,unnamed,unnamed,unnamed,unnamed,unnamed,unnamed,unnamed,unnamed,unnamed,unnamed,unnamed,unnamed,unnamed,unnamed,unnamed,unnamed,unnamed,unnamed,unnamed,unnamed,unnamed,unnamed,unnamed,unnamed,unnamed,unnamed,unnamed,unnamed,unnamed,unnamed…	Adcy1,Agtpbp1,Ap3b1,Apaf1,Arsg,Atrn,Cacng2,Cd40lg,Chrnb2,Ctnnb1,Cycs,Dclk1,Disc1,Dyrk1a,Efna3,Efna5,Emx1,Emx2,Epha4,Fbxw7,Fezf1,Fezf2,Foxg1,Gbx2,Hps6,Mapk8ip3,Mycbp2,Ncoa6,Ncor1,Neurog1,Numb,Numbl,Otx1,Otx2,Pax6,Prnp,Psen1,Shank3,Shh,Slc20a2,Sox2,Tal2,Tenm2,Vac14,Zfp423,Zic3,Zic5
Mouse Phenotype	MP:0000846	abnormal medulla oblongata morphology	375	6.85604e-11	6.47895e-07	1.72772e-09	1.81599	77.0928	140	0.00667701	0.0121254	377	3.7103e-07	0.00350623	9.30036e-06	2.13917	12.6217	27	33	0.00353033	0.818182	unnamed,unnamed,unnamed,unnamed,unnamed,unnamed,unnamed,unnamed,unnamed,unnamed,unnamed,unnamed,unnamed,unnamed,unnamed,unnamed,unnamed,unnamed,unnamed,unnamed,unnamed,unnamed,unnamed,unnamed,unnamed,unnamed,unnamed,unnamed,unnamed,unnamed,unnamed,unnamed,unnamed,unnamed,unnamed,unnamed,unnamed,unnamed,unnamed,unnamed,unnamed,unnamed,unnamed,unnamed,unnamed,unnamed,unnamed,unnamed,unnamed,unnamed…	Atrn,Bhlhe22,Cacna2d2,Dbx1,Dcc,Egr2,Galc,Gli3,Kdm6b,Kif2a,Lbx1,Map1b,Map2,Mapt,Mycn,Ndufs4,Nkx6-2,Ntn1,Phox2b,Pou4f1,Robo3,Rora,Scube1,Ube4b,Uchl1,Vac14,Zfp423
Mouse Phenotype	MP:0010119	abnormal bone mineral density	376	7.24135e-11	6.84307e-07	1.81997e-09	1.28766	517.995	667	0.0448636	0.0577689	212	8.85678e-10	8.36965e-06	3.94795e-08	1.37937	159.493	220	417	0.0287657	0.527578	unnamed,unnamed,unnamed,unnamed,unnamed,unnamed,unnamed,unnamed,unnamed,unnamed,unnamed,unnamed,unnamed,unnamed,unnamed,unnamed,unnamed,unnamed,unnamed,unnamed,unnamed,unnamed,unnamed,unnamed,unnamed,unnamed,unnamed,unnamed,unnamed,unnamed,unnamed,unnamed,unnamed,unnamed,unnamed,unnamed,unnamed,unnamed,unnamed,unnamed,unnamed,unnamed,unnamed,unnamed,unnamed,unnamed,unnamed,unnamed,unnamed,unnamed…	Adgrd1,Adgrf5,Ahcy,Aldob,Alg13,Alpl,Ank,Ankrd11,Anks1b,Anxa1,Apobec2,Arhgef4,Arl4d,Arsb,Atp2b1,Atp6v0a4,Atxn10,Babam2,Bach2,Bbx,Bdkrb2,Bhlhe40,Bmp1,Bmp5,Bmp7,Boc,Bzw2,Camk4,Car7,Cast,Ccr2,Cd40,Cd40lg,Cd81,Cd9,Cdh4,Cdo1,Chd2,Chn1,Chsy1,Cldn18,Clec11a,Clstn3,Clvs1,Cnr1,Col10a1,Col1a1,Colca2,Creb3l1,Csf1r,Ctsk,Cxxc5,Cyb5d1,Cyp17a1,Dagla,Dcstamp,Ddhd1,Def6,Degs1,Dhx40,Dio2,Dkk2,Dll1,Dnase2b,Dopey2,Eb…
Mouse Phenotype	MP:0001256	abnormal body length	377	7.51842e-11	7.1049e-07	1.88459e-09	1.27565	558.928	713	0.0484088	0.061753	107	1.3286e-13	1.25553e-09	1.17339e-11	1.48044	147.254	218	385	0.0285042	0.566234	unnamed,unnamed,unnamed,unnamed,unnamed,unnamed,unnamed,unnamed,unnamed,unnamed,unnamed,unnamed,unnamed,unnamed,unnamed,unnamed,unnamed,unnamed,unnamed,unnamed,unnamed,unnamed,unnamed,unnamed,unnamed,unnamed,unnamed,unnamed,unnamed,unnamed,unnamed,unnamed,unnamed,unnamed,unnamed,unnamed,unnamed,unnamed,unnamed,unnamed,unnamed,unnamed,unnamed,unnamed,unnamed,unnamed,unnamed,unnamed,unnamed,unnamed…	Abhd5,Adar,Adgrf5,Akap11,Aldob,Ank,Ankrd11,Ankrd26,Apc,Arhgap23,Arid3a,Arid5b,Arl4d,Arrdc3,Ass1,Auts2,Baz1a,Bbx,Bdnf,Bicdl1,Bmp1,Bmp6,Bmper,Btbd9,Bzw2,Car7,Cdc42,Cdo1,Cep19,Chd2,Chd7,Chst14,Clip2,Clvs1,Col1a1,Col24a1,Colca2,Cpe,Csgalnact1,Ctsk,Cul3,Cxcl14,Daam2,Dagla,Degs1,Dlg1,Dll1,Dmbx1,Dnajc10,Dph6,Dym,Dyrk1a,Egr1,Eif4g2,Epb41l4b,Esr1,Esr2,Evc,Fam20c,Fgf23,Fgfr2,Fgfr3,Fgl1,Foxc2,Fto,Fzd9,G6pc3…
Mouse Phenotype	MP:0008948	decreased neuron number	378	7.68605e-11	7.26331e-07	1.92151e-09	1.23721	733.098	907	0.0634937	0.0785553	52	4.14763e-17	3.91951e-13	7.53751e-15	1.50481	172.114	259	450	0.0338651	0.575556	unnamed,unnamed,unnamed,unnamed,unnamed,unnamed,unnamed,unnamed,unnamed,unnamed,unnamed,unnamed,unnamed,unnamed,unnamed,unnamed,unnamed,unnamed,unnamed,unnamed,unnamed,unnamed,unnamed,unnamed,unnamed,unnamed,unnamed,unnamed,unnamed,unnamed,unnamed,unnamed,unnamed,unnamed,unnamed,unnamed,unnamed,unnamed,unnamed,unnamed,unnamed,unnamed,unnamed,unnamed,unnamed,unnamed,unnamed,unnamed,unnamed,unnamed…	Abca4,Acot7,Adcyap1,Adrb2,Agtpbp1,Aipl1,Ank3,Arsg,Ascl1,Atf2,Atg7,Atmin,Atoh7,Atp2b2,Atp8a2,Atxn1,Avil,B4galt2,Barhl2,Bcar3,Bcl2,Bdnf,Bhlhe22,Cacna1a,Cacna1d,Cacna1g,Cacna2d2,Cacnb2,Cadps2,Camk4,Cdh23,Cers1,Chrna4,Clcn3,Cnga3,Cnp,Cntfr,Col11a1,Col25a1,Cox10,Cp,Crb2,Crlf1,Cry2,Csf1,Ctnna2,Ctnnb1,Cx3cr1,Cys1,Dfna5,Dmrta2,Dnmt3a,Dync1h1,E2f1,E2f3,Ebf2,Egr2,Egr3,Emx1,Emx2,En1,En2,Eno2,Entpd3,Eomes,Ep…
Mouse Phenotype	MP:0000322	increased granulocyte number	379	8.2334e-11	7.78057e-07	2.05292e-09	1.36766	328.299	449	0.028434	0.0388879	585	1.02575e-05	0.0969331	0.000165698	1.29954	129.277	168	338	0.0219665	0.497041	unnamed,unnamed,unnamed,unnamed,unnamed,unnamed,unnamed,unnamed,unnamed,unnamed,unnamed,unnamed,unnamed,unnamed,unnamed,unnamed,unnamed,unnamed,unnamed,unnamed,unnamed,unnamed,unnamed,unnamed,unnamed,unnamed,unnamed,unnamed,unnamed,unnamed,unnamed,unnamed,unnamed,unnamed,unnamed,unnamed,unnamed,unnamed,unnamed,unnamed,unnamed,unnamed,unnamed,unnamed,unnamed,unnamed,unnamed,unnamed,unnamed,unnamed…	1810011O10Rik,3110043O21Rik,Abca1,Abcg1,Ada,Adam10,Agr2,Akna,Ank1,Ankrd27,Apc,Arhgap25,Arntl,B4galnt2,B4galt1,Bach2,Bap1,Bcl2l11,Bcr,C4b,Casp8,Ccl2,Ccr2,Ccr3,Cd28,Cdh5,Cflar,Cish,Ciz1,Cmklr1,Col17a1,Col1a1,Coro1a,Crebbp,Csf1,Csf1r,Csf2,Csnk1g3,Ctnnb1,Ctss,Cxcl12,Dcc,Diaph1,Dlg3,Drosha,Dusp1,Dusp5,Enpp3,Eomes,Erbb4,Esr2,Fasl,Fcgr3,Fgfr1,Fgfr2,Foxa2,Fut4,Fzd9,G6pc3,Galnt18,Gcnt1,Gcnt4,Gimap5,Gmds,G…
Mouse Phenotype	MP:0003354	astrocytosis	380	8.53556e-11	8.06611e-07	2.12266e-09	1.59478	135.442	216	0.0117306	0.0187078	989	0.000337663	1	0.00322641	1.40139	47.8096	67	125	0.00876046	0.536	unnamed,unnamed,unnamed,unnamed,unnamed,unnamed,unnamed,unnamed,unnamed,unnamed,unnamed,unnamed,unnamed,unnamed,unnamed,unnamed,unnamed,unnamed,unnamed,unnamed,unnamed,unnamed,unnamed,unnamed,unnamed,unnamed,unnamed,unnamed,unnamed,unnamed,unnamed,unnamed,unnamed,unnamed,unnamed,unnamed,unnamed,unnamed,unnamed,unnamed,unnamed,unnamed,unnamed,unnamed,unnamed,unnamed,unnamed,unnamed,unnamed,unnamed…	Abcd2,Afg3l1,Aga,App,Arsa,Arsg,Atg7,Atmin,Atp1a3,Atrn,Cast,Cers1,Clcn3,Cntnap2,Col4a1,Dag1,Dnaic1,Drd1,Dync1h1,Emx1,En1,Esr2,Fig4,Fshr,Galc,Gba,Gjb1,Gjc2,Gpm6b,Grn,Kcnq3,Lrp1,Lrpap1,Lrrk2,Mapk1,Mapt,Mgat5b,Mlc1,Mog,Mt1,Nat8l,Ndufs4,Nf1,Ntrk2,Pdcd6ip,Pi4k2a,Plp1,Ppt1,Prkab1,Prnp,Psap,Psen1,Pten,Rb1,Rhot1,S1pr1,Scyl1,Snca,Sod1,Trib2,Tsc1,Tsc2,Tspan2,Uchl1,Vac14,Vegfa,Zfp106
Mouse Phenotype	MP:0001984	abnormal olfaction	381	9.13595e-11	8.63347e-07	2.266e-09	1.8488	70.8569	131	0.00613692	0.0113459	3111	0.0558799	1	0.169741	1.30727	19.8888	26	52	0.00339958	0.5	unnamed,unnamed,unnamed,unnamed,unnamed,unnamed,unnamed,unnamed,unnamed,unnamed,unnamed,unnamed,unnamed,unnamed,unnamed,unnamed,unnamed,unnamed,unnamed,unnamed,unnamed,unnamed,unnamed,unnamed,unnamed,unnamed,unnamed,unnamed,unnamed,unnamed,unnamed,unnamed,unnamed,unnamed,unnamed,unnamed,unnamed,unnamed,unnamed,unnamed,unnamed,unnamed,unnamed,unnamed,unnamed,unnamed,unnamed,unnamed,unnamed,unnamed…	Acsm4,Adcy3,Atp6v0a4,Cntnap2,Csf1r,Eno2,Fyn,Gabrr1,Gnal,Gng13,Id2,Lmx1a,Lmx1b,Mkks,Nav2,Nlgn3,Pde4a,Pebp1,Pten,Ptprs,Rora,Scn9a,Shank3,Slc24a4,Slc6a3,Ttc8
Mouse Phenotype	MP:0000826	abnormal third ventricle morphology	382	9.87352e-11	9.33048e-07	2.44253e-09	1.6669	109.185	182	0.00945652	0.015763	951	0.000280327	1	0.00278558	1.54663	27.1558	42	71	0.00549163	0.591549	unnamed,unnamed,unnamed,unnamed,unnamed,unnamed,unnamed,unnamed,unnamed,unnamed,unnamed,unnamed,unnamed,unnamed,unnamed,unnamed,unnamed,unnamed,unnamed,unnamed,unnamed,unnamed,unnamed,unnamed,unnamed,unnamed,unnamed,unnamed,unnamed,unnamed,unnamed,unnamed,unnamed,unnamed,unnamed,unnamed,unnamed,unnamed,unnamed,unnamed,unnamed,unnamed,unnamed,unnamed,unnamed,unnamed,unnamed,unnamed,unnamed,unnamed…	Adamts3,Apaf1,Arnt2,Atxn1,Cdc42,Celsr2,Chd7,Col18a1,Coro1c,Dlg5,Emx2,Foxc1,Fzd3,Hsf2,Map1b,Mkks,Msx1,Myh10,Napa,Ncoa6,Ncor1,Nek1,Nfia,Nfix,Nme7,Npas3,Ophn1,Otp,Otx1,Otx2,Pkd1,Psen1,Rb1,Rnd3,Sh3pxd2a,Slc17a6,Smarcc1,Sox2,Ulk4,Usp7,Wdfy3,Zic5
Mouse Phenotype	MP:0000828	abnormal fourth ventricle morphology	383	1.0398e-10	9.82614e-07	2.56557e-09	2.03158	49.7151	101	0.00430583	0.00874762	1299	0.00149941	1	0.0109079	1.74303	11.4743	20	30	0.00261506	0.666667	unnamed,unnamed,unnamed,unnamed,unnamed,unnamed,unnamed,unnamed,unnamed,unnamed,unnamed,unnamed,unnamed,unnamed,unnamed,unnamed,unnamed,unnamed,unnamed,unnamed,unnamed,unnamed,unnamed,unnamed,unnamed,unnamed,unnamed,unnamed,unnamed,unnamed,unnamed,unnamed,unnamed,unnamed,unnamed,unnamed,unnamed,unnamed,unnamed,unnamed,unnamed,unnamed,unnamed,unnamed,unnamed,unnamed,unnamed,unnamed,unnamed,unnamed…	Adamts3,Apaf1,Col18a1,Cp,Fgfr2,Foxc1,Gdf7,Gsx2,Kdm2b,Lmx1a,Lmx1b,Msx1,Myh10,Nek1,Npas3,Phox2b,Rb1,Sh3pxd2a,Tead1,Zfp423
Mouse Phenotype	MP:0010053	decreased grip strength	384	1.05396e-10	9.95993e-07	2.59373e-09	1.32827	399.77	531	0.0346241	0.04599	476	1.92042e-06	0.018148	3.8126e-05	1.35881	106.711	145	279	0.0189592	0.519713	unnamed,unnamed,unnamed,unnamed,unnamed,unnamed,unnamed,unnamed,unnamed,unnamed,unnamed,unnamed,unnamed,unnamed,unnamed,unnamed,unnamed,unnamed,unnamed,unnamed,unnamed,unnamed,unnamed,unnamed,unnamed,unnamed,unnamed,unnamed,unnamed,unnamed,unnamed,unnamed,unnamed,unnamed,unnamed,unnamed,unnamed,unnamed,unnamed,unnamed,unnamed,unnamed,unnamed,unnamed,unnamed,unnamed,unnamed,unnamed,unnamed,unnamed…	Ackr3,Acta1,Adarb1,Adipor2,Aff3,Ank,App,Ar,Arhgap23,Atp2b2,Btbd9,Cacna1a,Cacna1b,Cacna1s,Camk2b,Camkmt,Cap2,Ccdc92,Ccl2,Cd44,Cdkal1,Col12a1,Col4a1,Col6a2,Comp,Cox4i2,Cpe,Crebbp,Cx3cr1,Dag1,Des,Dlg4,Dmd,Dnajc5b,Dnmt3a,Drd1,Dtna,Dtnb,Dusp1,Dync1h1,Ect2,Eif4g2,Elfn1,Elmod1,Emx1,En1,En2,Eomes,Epha4,Fbn2,Fbxo41,Fbxw8,Fgf12,Flnc,Frmd5,Frrs1l,Fyb,Gaa,Gad1,Gars,Gas7,Gatm,Gbe1,Ghrhr,Gria2,Grm7,Gtf2ird1,Hm…
Mouse Phenotype	MP:0004433	abnormal cochlear inner hair cell physiology	385	1.08492e-10	1.02525e-06	2.66298e-09	2.762	19.5511	54	0.00169332	0.00467694	2451	0.0219193	1	0.0845114	1.90148	4.20724	8	11	0.00104602	0.727273	unnamed,unnamed,unnamed,unnamed,unnamed,unnamed,unnamed,unnamed,unnamed,unnamed,unnamed,unnamed,unnamed,unnamed,unnamed,unnamed,unnamed,unnamed,unnamed,unnamed,unnamed,unnamed,unnamed,unnamed,unnamed,unnamed,unnamed,unnamed,unnamed,unnamed,unnamed,unnamed,unnamed,unnamed,unnamed,unnamed,unnamed,unnamed,unnamed,unnamed,unnamed,unnamed,unnamed,unnamed,unnamed,unnamed,unnamed,unnamed,unnamed,unnamed…	Bsn,Cacna1d,Chrna9,Hpn,Kcnma1,Pax8,Thra,Thrb
Mouse Phenotype	MP:0005559	increased circulating glucose level	386	1.10634e-10	1.04549e-06	2.70853e-09	1.303	462.012	602	0.0400149	0.0521393	414	6.56637e-07	0.00620522	1.49885e-05	1.32498	141.134	187	369	0.0244508	0.506775	unnamed,unnamed,unnamed,unnamed,unnamed,unnamed,unnamed,unnamed,unnamed,unnamed,unnamed,unnamed,unnamed,unnamed,unnamed,unnamed,unnamed,unnamed,unnamed,unnamed,unnamed,unnamed,unnamed,unnamed,unnamed,unnamed,unnamed,unnamed,unnamed,unnamed,unnamed,unnamed,unnamed,unnamed,unnamed,unnamed,unnamed,unnamed,unnamed,unnamed,unnamed,unnamed,unnamed,unnamed,unnamed,unnamed,unnamed,unnamed,unnamed,unnamed…	Abcc8,Acaca,Adar,Adgrf5,Adipor2,Adora2b,Agap2,Agpat4,Akt3,Aldh1b1,Ank2,Apob,Appl1,Ar,Arfgef3,Arntl,Atp5g2,Avpi1,Bach1,Bad,Baiap2l1,Bdnf,Bhlhe40,Bmp4,Bscl2,Bsx,Btg2,Bzw2,Cacna1e,Ccdc120,Ccdc3,Ccdc80,Ccl2,Cdk4,Cdkal1,Cebpb,Cep19,Cinp,Clec16a,Col18a1,Col1a1,Cpe,Cpt1c,Crat,Crebbp,Crtc1,Csf2,Ctsb,Ctss,Cyp17a1,Daam1,Dnajc19,Dnajc3,Dynlrb2,Efna5,Esr1,Esr2,Evl,Fasn,Fbf1,Fgl1,Foxa2,Foxo1,Foxo3,Fto,Gad2,Gc…
Mouse Phenotype	MP:0000934	abnormal telencephalon development	387	1.11566e-10	1.0543e-06	2.72428e-09	1.39673	281.371	393	0.0243696	0.0340378	169	5.3299e-11	5.03676e-07	2.98033e-09	1.65377	63.4911	105	166	0.0137291	0.63253	unnamed,unnamed,unnamed,unnamed,unnamed,unnamed,unnamed,unnamed,unnamed,unnamed,unnamed,unnamed,unnamed,unnamed,unnamed,unnamed,unnamed,unnamed,unnamed,unnamed,unnamed,unnamed,unnamed,unnamed,unnamed,unnamed,unnamed,unnamed,unnamed,unnamed,unnamed,unnamed,unnamed,unnamed,unnamed,unnamed,unnamed,unnamed,unnamed,unnamed,unnamed,unnamed,unnamed,unnamed,unnamed,unnamed,unnamed,unnamed,unnamed,unnamed…	Adgrg1,Apaf1,Apbb1,Apbb2,Apc,Ascl1,Bcl2l1,Brsk2,Cdc42,Cdh2,Cdk5r1,Cdk5r2,Celsr3,Chd7,Cntn2,Ctnnb1,Ctnnbip1,Dab1,Dmrta2,Eml1,Emx1,Emx2,Enah,Evl,Fbxo45,Fbxw7,Fezf2,Fgf8,Foxc1,Foxg1,Gbx2,Gja1,Gli2,Gli3,Gsx2,Hand1,Hes1,Hes3,Hhat,Hhex,Id2,Id3,Islr2,Itgb1,Kat6b,Kif20b,Kit,Lamc1,Lef1,Lemd2,Lep,Lhx2,Lrp2,Lrp8,Map1b,Mapk8ip3,Mcph1,Mecom,Mycbp2,Mycn,Napa,Ncor2,Ndel1,Neurod6,Nr2e1,Ntrk2,Numb,Numbl,Otx1,Otx2…
Mouse Phenotype	MP:0011086	postnatal lethality, incomplete penetrance	388	1.16094e-10	1.09709e-06	2.82755e-09	1.18102	1163.4	1374	0.100762	0.119002	69	5.9858e-16	5.65658e-12	8.19794e-14	1.35969	305.216	415	798	0.0542625	0.52005	unnamed,unnamed,unnamed,unnamed,unnamed,unnamed,unnamed,unnamed,unnamed,unnamed,unnamed,unnamed,unnamed,unnamed,unnamed,unnamed,unnamed,unnamed,unnamed,unnamed,unnamed,unnamed,unnamed,unnamed,unnamed,unnamed,unnamed,unnamed,unnamed,unnamed,unnamed,unnamed,unnamed,unnamed,unnamed,unnamed,unnamed,unnamed,unnamed,unnamed,unnamed,unnamed,unnamed,unnamed,unnamed,unnamed,unnamed,unnamed,unnamed,unnamed…	Abca1,Abl1,Abl2,Acadm,Ackr3,Adam19,Adarb1,Adcy3,Adcyap1,Adcyap1r1,Aff1,Agt,Agtr1b,Akap6,Akna,Alk,Ank1,Anks1b,Ap1m2,Apaf1,Apc,Aplp2,Apobec1,App,Asxl1,Asxl2,Atf2,Atn1,Atp6v0a4,B4galt1,Basp1,Bcl2,Bcl2l11,Bdkrb2,Bdnf,Bicc1,Bmp4,Brinp1,Bscl2,Cacna1b,Cacna2d2,Cacng2,Cacng3,Cacng4,Cap2,Casp8,Cby1,Ccnd1,Cdc42,Cdk4,Cdkn1c,Cdo1,Cdon,Cebpb,Celf1,Cftr,Chd2,Chd7,Chst14,Cnr1,Col10a1,Col17a1,Col19a1,Col1a1,Col4…
Mouse Phenotype	MP:0013663	increased myeloid cell number	389	1.19193e-10	1.12637e-06	2.89555e-09	1.37215	315.563	433	0.027331	0.0375022	1800	0.00665329	1	0.0349298	1.19179	108.241	129	283	0.0168672	0.45583	unnamed,unnamed,unnamed,unnamed,unnamed,unnamed,unnamed,unnamed,unnamed,unnamed,unnamed,unnamed,unnamed,unnamed,unnamed,unnamed,unnamed,unnamed,unnamed,unnamed,unnamed,unnamed,unnamed,unnamed,unnamed,unnamed,unnamed,unnamed,unnamed,unnamed,unnamed,unnamed,unnamed,unnamed,unnamed,unnamed,unnamed,unnamed,unnamed,unnamed,unnamed,unnamed,unnamed,unnamed,unnamed,unnamed,unnamed,unnamed,unnamed,unnamed…	1810011O10Rik,Abcb10,Abcg5,Actl6a,Adam10,Add2,Add3,Agap1,Ago2,Ank1,Anxa7,Arntl,Arsg,Asxl1,Bach2,Bap1,Bcl11a,Bcl2l1,Bcl6b,Casp8,Cbfa2t3,Ccdc88b,Cd47,Cdkn2b,Cflar,Chordc1,Chrnb2,Col1a1,Csf1,Csf2,Csf3r,Ctnna2,Ctnnbip1,Cyb561,Dact2,Dcbld2,Dcc,Dck,Dmtn,Egln1,Egln3,Epas1,Epb41,Epor,Esr2,Etv6,Exoc6,Fam107b,Fam110b,Fbxo7,Fech,Fli1,Foxo3,Fyn,Gimap6,Gpi1,Hk1,Hmga1,Ifng,Ikzf1,Irf2bp2,Itgb3,Jak1,Kcne2,Kit,Ki…
Mouse Phenotype	MP:0002875	decreased erythrocyte cell number	390	1.24624e-10	1.1777e-06	3.01974e-09	1.42927	242.081	346	0.0209667	0.0299671	1105	0.00061457	1	0.00525583	1.27873	87.5871	112	229	0.0146444	0.489083	unnamed,unnamed,unnamed,unnamed,unnamed,unnamed,unnamed,unnamed,unnamed,unnamed,unnamed,unnamed,unnamed,unnamed,unnamed,unnamed,unnamed,unnamed,unnamed,unnamed,unnamed,unnamed,unnamed,unnamed,unnamed,unnamed,unnamed,unnamed,unnamed,unnamed,unnamed,unnamed,unnamed,unnamed,unnamed,unnamed,unnamed,unnamed,unnamed,unnamed,unnamed,unnamed,unnamed,unnamed,unnamed,unnamed,unnamed,unnamed,unnamed,unnamed…	Abcb10,Actl6a,Adam10,Ago2,Ank1,Atmin,Atp6v1c1,Atp8a1,B4galt1,Bcl11a,Bcl2l11,Bmp4,Bmp7,Btg2,Bub1b,Ccbe1,Ccna1,Ccnd1,Ccnd3,Cd74,Cdk4,Chd2,Col1a1,Col4a1,Col4a2,Cpeb4,Ddrgk1,Dnase2a,Dnmt1,Dph6,Dpy19l3,Elk4,Epas1,Epor,Exoc6,Fam53b,Fancc,Fbxo7,Fech,Foxo3,Gata4,Gata6,Gpi1,Gse1,Hfe2,Hgf,Hk1,Ifng,Ikzf1,Irf2bp2,Irf8,Itga2b,Itgb3,Jarid2,Kcne2,Kdm1a,Kit,Kitl,Klf13,Klf3,Kmt2a,Kmt2e,Ldha,Lgmn,Lmo2,Lyn,Mcl1,Mdm…
Mouse Phenotype	MP:0001924	infertility	391	1.30732e-10	1.23542e-06	3.15964e-09	1.20301	945.957	1138	0.0819295	0.0985623	749	5.08504e-05	0.480536	0.00064157	1.16635	333.519	389	872	0.050863	0.446101	unnamed,unnamed,unnamed,unnamed,unnamed,unnamed,unnamed,unnamed,unnamed,unnamed,unnamed,unnamed,unnamed,unnamed,unnamed,unnamed,unnamed,unnamed,unnamed,unnamed,unnamed,unnamed,unnamed,unnamed,unnamed,unnamed,unnamed,unnamed,unnamed,unnamed,unnamed,unnamed,unnamed,unnamed,unnamed,unnamed,unnamed,unnamed,unnamed,unnamed,unnamed,unnamed,unnamed,unnamed,unnamed,unnamed,unnamed,unnamed,unnamed,unnamed…	4930447C04Rik,Aaas,Abca1,Abcg5,Acox1,Acr,Adamts2,Adgrd1,Aff1,Agps,Agtpbp1,Alpl,Ank1,Ankrd6,Antxr1,Antxr2,Ap3b1,Apaf1,Ar,Arhgef15,Arid5b,Arl6,Arntl,Atp2b2,B4galnt1,Baz1a,Bcl2l1,Bcl2l11,Bdnf,Bicc1,Bmp5,Bmp6,Bmp7,Bmp8a,Bmp8b,Bscl2,Bub1b,Cacna1a,Cacna2d2,Cacnb4,Cacng2,Cadm1,Camk2g,Camk4,Capza3,Catsperz,Cby1,Ccdc155,Ccdc42,Ccna1,Ccnd1,Cd9,Cdk4,Cdk5rap2,Cdkn1c,Cdkn2a,Cdo1,Cebpb,Celf1,Cfap54,Cftr,Chd5,C…
Mouse Phenotype	MP:0005461	abnormal dendritic cell morphology	392	1.33149e-10	1.25826e-06	3.20984e-09	1.57184	142.508	224	0.0123427	0.0194007	439	1.02368e-06	0.00967374	2.20359e-05	1.50639	57.754	87	151	0.0113755	0.576159	unnamed,unnamed,unnamed,unnamed,unnamed,unnamed,unnamed,unnamed,unnamed,unnamed,unnamed,unnamed,unnamed,unnamed,unnamed,unnamed,unnamed,unnamed,unnamed,unnamed,unnamed,unnamed,unnamed,unnamed,unnamed,unnamed,unnamed,unnamed,unnamed,unnamed,unnamed,unnamed,unnamed,unnamed,unnamed,unnamed,unnamed,unnamed,unnamed,unnamed,unnamed,unnamed,unnamed,unnamed,unnamed,unnamed,unnamed,unnamed,unnamed,unnamed…	Abcg1,Ada,Adamts3,Anxa5,Anxa6,Apc,Arhgef1,Armc7,Atg7,B9d2,Batf3,Bcl11a,Bcl11b,Bcl2l11,Ccl17,Ccl2,Ccr2,Cd83,Cdkn2b,Col10a1,Col1a1,Csf1,Csf1r,Cx3cr1,Dock2,Epcam,Fcer1g,Fcgr1,Gmds,Gpa33,Gtf2a1,Hpse,Ifih1,Ikzf1,Ikzf3,Il1rn,Il34,Inpp5d,Irf4,Irf5,Irf8,Itgam,Itgax,Itgb6,Jak3,Lair1,Lyn,Map3k14,March1,Mfap2,Mfge8,Mycl,Nfkb1,Nfkb2,Notch1,Pip5k1c,Plcg2,Ptpn6,Ptprc,Rbpj,Rela,Relb,Rptor,Rras2,Runx3,Rxra,Sigle…
Mouse Phenotype	MP:0001525	impaired balance	393	1.34143e-10	1.26765e-06	3.22557e-09	1.45157	219.762	319	0.0190336	0.0276286	710	3.45077e-05	0.326097	0.000459292	1.43263	55.8416	80	146	0.0104603	0.547945	unnamed,unnamed,unnamed,unnamed,unnamed,unnamed,unnamed,unnamed,unnamed,unnamed,unnamed,unnamed,unnamed,unnamed,unnamed,unnamed,unnamed,unnamed,unnamed,unnamed,unnamed,unnamed,unnamed,unnamed,unnamed,unnamed,unnamed,unnamed,unnamed,unnamed,unnamed,unnamed,unnamed,unnamed,unnamed,unnamed,unnamed,unnamed,unnamed,unnamed,unnamed,unnamed,unnamed,unnamed,unnamed,unnamed,unnamed,unnamed,unnamed,unnamed…	Abcd2,Abr,Aff1,Aga,Ank1,Ank2,Arsa,Atp2b2,Bcr,Bdnf,Cacna1a,Camk2b,Cers1,Cnp,Ctnnb1,Dab1,Dlg4,Drd1,Dst,En1,Ercc3,Fam20c,Fbxo41,Gas1,Gli2,Gnb5,Grid2,Grin2a,Grm1,Grm7,Ifitm1,Itpr1,Jag1,Kcna1,Kcnc1,Kcnj10,Kcnq1,Kif14,Kif1a,Lhfpl5,Lpin2,Lrp8,Lyst,Mapt,Myh10,Myo5a,Myo6,Napa,Ndufs4,Neurod1,Nfasc,Nos1,Nr4a3,Pcdh15,Pde10a,Pdss2,Pex2,Pou4f3,Pparg,Ppp2r5c,Prnp,Prrt2,Psap,Pten,Rb1,Robo3,Rora,Sacs,Scn8a,Slc12a…
Mouse Phenotype	MP:0005159	azoospermia	394	1.50004e-10	1.41754e-06	3.59781e-09	1.53313	161.108	247	0.0139536	0.0213927	4876	0.191055	1	0.370276	1.08821	70.7582	77	185	0.010068	0.416216	unnamed,unnamed,unnamed,unnamed,unnamed,unnamed,unnamed,unnamed,unnamed,unnamed,unnamed,unnamed,unnamed,unnamed,unnamed,unnamed,unnamed,unnamed,unnamed,unnamed,unnamed,unnamed,unnamed,unnamed,unnamed,unnamed,unnamed,unnamed,unnamed,unnamed,unnamed,unnamed,unnamed,unnamed,unnamed,unnamed,unnamed,unnamed,unnamed,unnamed,unnamed,unnamed,unnamed,unnamed,unnamed,unnamed,unnamed,unnamed,unnamed,unnamed…	4930447C04Rik,Agps,Agtpbp1,Alpl,Apaf1,Ar,Bcl2l1,Bcl2l11,Ccdc42,Cdk4,Cib1,Cks2,Clcn2,Cldn11,Dhh,Dicer1,Dmc1,Dnmt3a,Eif4g3,Etv5,Fkbp6,Gal3st1,Gja1,Gtf2a1,Hmga1,Hmga2,Hormad2,Hsf2,Igf1r,Kcnj6,Kit,Kitl,Kl,Lhx3,Lmna,Lmtk2,Map2,Mcmdc2,Mei1,Mei4,Mertk,Mlh1,Mlh3,Mov10l1,Mybl1,Nanos2,Nme5,Nrg1,Nup210l,Nupr1,Pin1,Piwil1,Pld6,Plekha5,Poc1a,Polg,Ppp1cc,Prdm1,Prokr2,Ranbp9,Rxfp1,Rxfp2,Scmh1,Setx,Siah1a,Slc12a…
Mouse Phenotype	MP:0002919	enhanced paired-pulse facilitation	395	1.57391e-10	1.48735e-06	3.76544e-09	1.83247	71.4882	131	0.0061916	0.0113459	815	9.85188e-05	0.931003	0.00114233	1.76329	16.4465	29	43	0.00379184	0.674419	unnamed,unnamed,unnamed,unnamed,unnamed,unnamed,unnamed,unnamed,unnamed,unnamed,unnamed,unnamed,unnamed,unnamed,unnamed,unnamed,unnamed,unnamed,unnamed,unnamed,unnamed,unnamed,unnamed,unnamed,unnamed,unnamed,unnamed,unnamed,unnamed,unnamed,unnamed,unnamed,unnamed,unnamed,unnamed,unnamed,unnamed,unnamed,unnamed,unnamed,unnamed,unnamed,unnamed,unnamed,unnamed,unnamed,unnamed,unnamed,unnamed,unnamed…	Add2,Apba1,Apba2,Cacna1a,Cspg5,Dlg4,Mapt,Mef2a,Mef2c,Mef2d,Ptn,Ptprd,Rab3a,Rab3c,Rab3gap1,Rims1,Sirpa,Slc8a2,Snap25,Snph,Spred1,Ston2,Stx1a,Stxbp5,Syn1,Syt2,Tnik,Unc13c,Vamp2
Mouse Phenotype	MP:0008944	decreased sensitivity to induced cell death	396	1.63417e-10	1.54429e-06	3.89972e-09	1.70584	96.1404	164	0.00832673	0.014204	6570	0.386056	1	0.555286	1.0515	35.1878	37	92	0.00483787	0.402174	unnamed,unnamed,unnamed,unnamed,unnamed,unnamed,unnamed,unnamed,unnamed,unnamed,unnamed,unnamed,unnamed,unnamed,unnamed,unnamed,unnamed,unnamed,unnamed,unnamed,unnamed,unnamed,unnamed,unnamed,unnamed,unnamed,unnamed,unnamed,unnamed,unnamed,unnamed,unnamed,unnamed,unnamed,unnamed,unnamed,unnamed,unnamed,unnamed,unnamed,unnamed,unnamed,unnamed,unnamed,unnamed,unnamed,unnamed,unnamed,unnamed,unnamed…	Antxr1,Antxr2,Apaf1,Casp7,Cd44,Cebpb,Chek2,Cul9,Cycs,Dab2ip,Dapk1,Dusp6,Eef2k,Gadd45a,Ift122,Ip6k2,Map3k5,Mdm2,Mdm4,Mlh1,Mlkl,Ndrg1,Oma1,Pawr,Per2,Pmaip1,Ppif,Pten,Ptpn6,Rad51d,Setd7,Stat1,Stim2,Stk4,Tradd,Trim27,Trp63
Mouse Phenotype	MP:0010358	abnormal free fatty acids level	397	1.68822e-10	1.59537e-06	4.01857e-09	1.45875	211.14	308	0.0182869	0.0266759	1462	0.00263671	1	0.017043	1.25151	80.7025	101	211	0.0132061	0.478673	unnamed,unnamed,unnamed,unnamed,unnamed,unnamed,unnamed,unnamed,unnamed,unnamed,unnamed,unnamed,unnamed,unnamed,unnamed,unnamed,unnamed,unnamed,unnamed,unnamed,unnamed,unnamed,unnamed,unnamed,unnamed,unnamed,unnamed,unnamed,unnamed,unnamed,unnamed,unnamed,unnamed,unnamed,unnamed,unnamed,unnamed,unnamed,unnamed,unnamed,unnamed,unnamed,unnamed,unnamed,unnamed,unnamed,unnamed,unnamed,unnamed,unnamed…	Abhd5,Acaca,Acot13,Acot7,Adcyap1,Agap2,Angptl3,Ank2,Ankrd26,Ap2a2,Apc,Apoa2,Apob,Aqp11,Arntl,Asxl1,Bscl2,Cacna2d3,Car7,Cavin1,Ccdc120,Ccdc80,Ccl2,Cebpb,Cenpo,Chn1,Cldn19,Crat,Crebbp,Crhr2,Crtc3,Csf2,Cyb5d1,Dap,Dclk1,Diaph3,Dip2b,Dixdc1,Dpy19l3,Dusp1,Emid1,Fasn,Ffar2,Ffar3,Fgl1,Foxa2,Foxo1,G0s2,Gab1,Hmgcr,Hrh1,Il12rb2,Inppl1,Insr,Irs1,Irs2,Irs3,Itga8,Kif26b,Ldlr,Lep,Lpin2,Lrp1,Mc4r,Mgat4a,Mlxipl,N…
Mouse Phenotype	MP:0005445	abnormal neurotransmitter secretion	398	1.72939e-10	1.63428e-06	4.10623e-09	1.58304	135.814	215	0.0117629	0.0186212	517	3.36973e-06	0.0318439	6.15937e-05	1.64965	32.128	53	84	0.00692992	0.630952	unnamed,unnamed,unnamed,unnamed,unnamed,unnamed,unnamed,unnamed,unnamed,unnamed,unnamed,unnamed,unnamed,unnamed,unnamed,unnamed,unnamed,unnamed,unnamed,unnamed,unnamed,unnamed,unnamed,unnamed,unnamed,unnamed,unnamed,unnamed,unnamed,unnamed,unnamed,unnamed,unnamed,unnamed,unnamed,unnamed,unnamed,unnamed,unnamed,unnamed,unnamed,unnamed,unnamed,unnamed,unnamed,unnamed,unnamed,unnamed,unnamed,unnamed…	Adgrl1,Adra2a,Adra2c,Ap3m2,Cacna1a,Cacna2d2,Cask,Chrna4,Col13a1,Cplx2,Crhr1,Dlg4,Doc2a,Eef1a2,Emx1,En1,En2,Entpd1,Gdnf,Gfra1,Grid2,Kcnj6,Lmx1b,Lrrk2,Mapk8ip2,Mapk9,Nos1,Nrxn2,Nrxn3,Oprk1,Prmt8,Rab3a,Rab3c,Rab3gap1,Rap1a,Rap1b,Rbfox3,Rora,Shh,Slc17a6,Slc32a1,Slc6a1,Slc6a3,Snap25,Snca,St3gal5,Stxbp1,Syn1,Syt1,Syt2,Uchl1,Unc13a,Vamp2
Mouse Phenotype	MP:0014206	decreased intestinal epithelial sodium ion transmembrane transport	399	1.88613e-10	1.78239e-06	4.46714e-09	4.59195	5.87985	27	0.000509254	0.00233847	4587	0.159583	1	0.328769	1.9609	1.52991	3	4	0.000392259	0.75	unnamed,unnamed,unnamed,unnamed,unnamed,unnamed,unnamed,unnamed,unnamed,unnamed,unnamed,unnamed,unnamed,unnamed,unnamed,unnamed,unnamed,unnamed,unnamed,unnamed,unnamed,unnamed,unnamed,unnamed,unnamed,unnamed,unnamed	Cftr,Nedd4l,Scnn1a
Mouse Phenotype	MP:0000602	enlarged liver sinusoidal spaces	400	1.8932e-10	1.78907e-06	4.47269e-09	2.0673	45.4699	94	0.00393815	0.00814135	1795	0.00662667	1	0.0348869	1.53046	15.6815	24	41	0.00313808	0.585366	unnamed,unnamed,unnamed,unnamed,unnamed,unnamed,unnamed,unnamed,unnamed,unnamed,unnamed,unnamed,unnamed,unnamed,unnamed,unnamed,unnamed,unnamed,unnamed,unnamed,unnamed,unnamed,unnamed,unnamed,unnamed,unnamed,unnamed,unnamed,unnamed,unnamed,unnamed,unnamed,unnamed,unnamed,unnamed,unnamed,unnamed,unnamed,unnamed,unnamed,unnamed,unnamed,unnamed,unnamed,unnamed,unnamed,unnamed,unnamed,unnamed,unnamed…	Actn4,Acvrl1,Adcy9,Coro1c,Cyp11a1,Dbn1,Egln1,Exoc3l2,H13,Hgf,Jak1,Jarid2,Map2k4,Mtf1,Notch1,Nxn,Prrc2b,Rb1,Sh3pxd2a,Slc20a1,Smad2,Smad3,Tcf7l2,Trim37
Mouse Phenotype	MP:0005092	decreased double-positive T cell number	401	1.96554e-10	1.85744e-06	4.63201e-09	1.44895	218.089	316	0.0188887	0.0273688	1512	0.00279267	1	0.0174542	1.26034	74.5829	94	195	0.0122908	0.482051	unnamed,unnamed,unnamed,unnamed,unnamed,unnamed,unnamed,unnamed,unnamed,unnamed,unnamed,unnamed,unnamed,unnamed,unnamed,unnamed,unnamed,unnamed,unnamed,unnamed,unnamed,unnamed,unnamed,unnamed,unnamed,unnamed,unnamed,unnamed,unnamed,unnamed,unnamed,unnamed,unnamed,unnamed,unnamed,unnamed,unnamed,unnamed,unnamed,unnamed,unnamed,unnamed,unnamed,unnamed,unnamed,unnamed,unnamed,unnamed,unnamed,unnamed…	Ada,Adam10,Aff1,Akt3,Arid5b,Bcl11b,Bcl2,Bcl2l1,Bcl2l11,Bhlhe40,Cacnb4,Cbx4,Ccnd3,Cd40lg,Cd5,Chd4,Col10a1,Crebbp,Ctcf,Ctla4,Cux1,Cxcr4,Dck,Dnase2a,Dock2,Drosha,Dyrk1a,E2f1,E2f6,Efnb2,Fos,Foxo1,Fyn,Gata3,Gba,Grap2,Grb2,Hcls1,Hes1,Hivep3,Hnrnpl,Ikzf1,Kit,Kitl,Kmt2e,Lat,Lcp2,Mapk1,Mcl1,Mdm2,Mertk,Msi2,Nfatc1,Nfkb1,Nfkb2,Nfkbia,Nlk,Nmt1,Nmt2,Notch1,Nr3c1,Pax1,Pik3cd,Pik3cg,Polg,Ppp4c,Prkch,Prkcq,Prnp,…
Mouse Phenotype	MP:0004563	absent active-zone-anchored inner hair cell synaptic ribbon	402	1.98039e-10	1.87147e-06	4.65541e-09	6.74611	2.81644	19	0.000243932	0.00164559	4134	0.146277	1	0.334377	2.61454	0.764953	2	2	0.000261506	1	unnamed,unnamed,unnamed,unnamed,unnamed,unnamed,unnamed,unnamed,unnamed,unnamed,unnamed,unnamed,unnamed,unnamed,unnamed,unnamed,unnamed,unnamed,unnamed	Bsn,Cacna1d
Mouse Phenotype	MP:0002398	abnormal bone marrow cell morphology/development	403	1.99217e-10	1.8826e-06	4.67146e-09	1.24695	652.791	814	0.0565383	0.0705006	505	2.91927e-06	0.0275871	5.46279e-05	1.23708	227.956	282	596	0.0368724	0.473154	unnamed,unnamed,unnamed,unnamed,unnamed,unnamed,unnamed,unnamed,unnamed,unnamed,unnamed,unnamed,unnamed,unnamed,unnamed,unnamed,unnamed,unnamed,unnamed,unnamed,unnamed,unnamed,unnamed,unnamed,unnamed,unnamed,unnamed,unnamed,unnamed,unnamed,unnamed,unnamed,unnamed,unnamed,unnamed,unnamed,unnamed,unnamed,unnamed,unnamed,unnamed,unnamed,unnamed,unnamed,unnamed,unnamed,unnamed,unnamed,unnamed,unnamed…	1810011O10Rik,Abca1,Abcc10,Abcg1,Abcg5,Abl1,Actl6a,Ada,Adar,Ago2,Ank1,Ano6,Ar,Arhgap22,Arid3a,Arid3b,Arid5b,Arntl,Asxl1,Atf2,Atg7,B4galt1,Bach2,Bcl11a,Bcl2l1,Bcl2l11,Brd1,Bub1b,C3ar1,Cacna1a,Casp8,Casq2,Cbfa2t3,Ccna1,Ccnd1,Ccnd3,Ccr2,Ccr3,Cd28,Cd34,Cd47,Cd74,Cdh5,Cdk4,Cdkn2a,Cdkn2b,Cebpb,Cebpe,Cflar,Chd2,Chordc1,Chrnb2,Cish,Clec11a,Col10a1,Col17a1,Col1a1,Creb3l1,Crebbp,Csf1,Csf1r,Csf2,Csf3r,Csnk1…
Mouse Phenotype	MP:0002111	abnormal tail morphology	404	2.02947e-10	1.91784e-06	4.74714e-09	1.26031	592.712	747	0.0513349	0.0646977	227	2.70643e-09	2.55757e-05	1.12668e-07	1.37104	156.815	215	410	0.0281119	0.52439	unnamed,unnamed,unnamed,unnamed,unnamed,unnamed,unnamed,unnamed,unnamed,unnamed,unnamed,unnamed,unnamed,unnamed,unnamed,unnamed,unnamed,unnamed,unnamed,unnamed,unnamed,unnamed,unnamed,unnamed,unnamed,unnamed,unnamed,unnamed,unnamed,unnamed,unnamed,unnamed,unnamed,unnamed,unnamed,unnamed,unnamed,unnamed,unnamed,unnamed,unnamed,unnamed,unnamed,unnamed,unnamed,unnamed,unnamed,unnamed,unnamed,unnamed…	Aebp2,Aff3,Ap3b1,Apaf1,Apc,Arsb,Atg7,Atp2b1,Atp5b,Avil,Axin2,Bmp10,Bmp4,Bmp5,Bmp7,Bmper,Brd7,Cask,Ccdc33,Cer1,Chst14,Clec16a,Cnot4,Coa5,Col1a1,Crtc3,Csf1,Csf1r,Ctdspl,Ctnnb1,Cyld,Cyp26a1,Cyp26c1,Dact1,Dctn1,Dkk1,Dlg1,Dll1,Dmrt2,Dot1l,Dph6,Dst,Dusp4,Dync2li1,Edar,Ednrb,Egr2,Etl4,Fam212b,Fgf18,Fgf9,Fgfr1,Fgfr2,Fgfr3,Fn1,Fos,Foxo1,Fzd3,G3bp1,Glce,Gnaq,Gpr158,Grem1,Grhl2,Grm7,H13,Hmga1,Hmga2,Hoxc13,H…
Mouse Phenotype	MP:0003974	abnormal endocardium morphology	405	2.06554e-10	1.95193e-06	4.81959e-09	1.91518	59.5245	114	0.00515542	0.00987355	2363	0.0206931	1	0.0827548	1.53266	11.0918	17	29	0.0022228	0.586207	unnamed,unnamed,unnamed,unnamed,unnamed,unnamed,unnamed,unnamed,unnamed,unnamed,unnamed,unnamed,unnamed,unnamed,unnamed,unnamed,unnamed,unnamed,unnamed,unnamed,unnamed,unnamed,unnamed,unnamed,unnamed,unnamed,unnamed,unnamed,unnamed,unnamed,unnamed,unnamed,unnamed,unnamed,unnamed,unnamed,unnamed,unnamed,unnamed,unnamed,unnamed,unnamed,unnamed,unnamed,unnamed,unnamed,unnamed,unnamed,unnamed,unnamed…	Acvrl1,Adgrg6,Ctnnb1,Efnb2,Flrt2,Fn1,Gab1,Gab2,Mef2c,Ptk2,Ptprj,Scn8a,Slc8a1,Smad6,Thbd,Tsc2,Wasf2
Mouse Phenotype	MP:0008028	pregnancy-related premature death	406	2.10492e-10	1.98915e-06	4.89938e-09	2.3398	30.3444	71	0.00262813	0.00614932	4878	0.193606	1	0.375067	1.25885	10.3269	13	27	0.00169979	0.481482	unnamed,unnamed,unnamed,unnamed,unnamed,unnamed,unnamed,unnamed,unnamed,unnamed,unnamed,unnamed,unnamed,unnamed,unnamed,unnamed,unnamed,unnamed,unnamed,unnamed,unnamed,unnamed,unnamed,unnamed,unnamed,unnamed,unnamed,unnamed,unnamed,unnamed,unnamed,unnamed,unnamed,unnamed,unnamed,unnamed,unnamed,unnamed,unnamed,unnamed,unnamed,unnamed,unnamed,unnamed,unnamed,unnamed,unnamed,unnamed,unnamed,unnamed…	Adam19,Antxr2,Ap3b1,F3,Hoxd10,Inhbb,Itgb3,Kalrn,Kcnn3,Myl2,Nrk,Slc8a1,Stat3
Mouse Phenotype	MP:0000890	thin cerebellar molecular layer	407	2.20231e-10	2.08118e-06	5.11346e-09	1.89512	61.7376	117	0.0053471	0.0101334	2771	0.0366506	1	0.12499	1.41326	14.1516	20	37	0.00261506	0.54054	unnamed,unnamed,unnamed,unnamed,unnamed,unnamed,unnamed,unnamed,unnamed,unnamed,unnamed,unnamed,unnamed,unnamed,unnamed,unnamed,unnamed,unnamed,unnamed,unnamed,unnamed,unnamed,unnamed,unnamed,unnamed,unnamed,unnamed,unnamed,unnamed,unnamed,unnamed,unnamed,unnamed,unnamed,unnamed,unnamed,unnamed,unnamed,unnamed,unnamed,unnamed,unnamed,unnamed,unnamed,unnamed,unnamed,unnamed,unnamed,unnamed,unnamed…	Aff1,Ank3,Atp2b2,Cacna1a,Camta1,Cend1,Grid2,Itpr1,Map1a,Mapk8ip2,Numb,Prnp,Rb1,Rbfox2,Rora,Skor2,Sptbn2,Sun1,Sun2,Thrb
Mouse Phenotype	MP:0005405	axon degeneration	408	2.24047e-10	2.11725e-06	5.18933e-09	1.59522	129.136	206	0.0111845	0.0178417	992	0.000343836	1	0.00327546	1.45252	37.8652	55	99	0.00719142	0.555556	unnamed,unnamed,unnamed,unnamed,unnamed,unnamed,unnamed,unnamed,unnamed,unnamed,unnamed,unnamed,unnamed,unnamed,unnamed,unnamed,unnamed,unnamed,unnamed,unnamed,unnamed,unnamed,unnamed,unnamed,unnamed,unnamed,unnamed,unnamed,unnamed,unnamed,unnamed,unnamed,unnamed,unnamed,unnamed,unnamed,unnamed,unnamed,unnamed,unnamed,unnamed,unnamed,unnamed,unnamed,unnamed,unnamed,unnamed,unnamed,unnamed,unnamed…	Abcd2,Afg3l1,Atg7,Atp8a2,Avil,Cacna2d2,Chl1,Clcn2,Cln8,Cnp,Csf1r,Dock3,Dst,En1,Epg5,Galc,Gars,Gjb1,Gjc2,Gpm6b,Isl1,Kcnj10,Kif1a,Kif5a,Klc1,Lpin1,Maf,Mag,Mbp,Mtmr2,Ncam1,Ndufs4,Nf1,Nkx6-2,Nmnat2,Plp1,Pmp22,Psap,Reep1,Sacs,Scn8a,Slc12a6,Slc9a1,Snca,Spg7,Sptbn4,Stmn1,Stxbp1,Tfam,Tspan2,Ube4b,Uchl1,Vapb,Vegfa,Zfp106
Mouse Phenotype	MP:0005346	abnormal circulating aldosterone level	409	2.33084e-10	2.20264e-06	5.38543e-09	1.95642	54.6917	107	0.00473685	0.00926728	884	0.000176198	1	0.00188357	1.74303	16.064	28	42	0.00366109	0.666667	unnamed,unnamed,unnamed,unnamed,unnamed,unnamed,unnamed,unnamed,unnamed,unnamed,unnamed,unnamed,unnamed,unnamed,unnamed,unnamed,unnamed,unnamed,unnamed,unnamed,unnamed,unnamed,unnamed,unnamed,unnamed,unnamed,unnamed,unnamed,unnamed,unnamed,unnamed,unnamed,unnamed,unnamed,unnamed,unnamed,unnamed,unnamed,unnamed,unnamed,unnamed,unnamed,unnamed,unnamed,unnamed,unnamed,unnamed,unnamed,unnamed,unnamed…	Agt,Cul3,Cyp11a1,Cyp2c44,Ddc,Dkk3,Hsd11b2,Kcne1,Kcne3,Kcnk3,Kcnk9,Mc2r,Nedd4l,Nr3c1,Nr3c2,Pcmt1,Pomc,Pparg,Ren1,Scnn1a,Scnn1b,Sgk1,Slc4a4,Slc4a5,Slc5a2,Stk39,Strn,Vav2
Mouse Phenotype	MP:0013309	adrenal gland cyst	410	2.43346e-10	2.29962e-06	5.60883e-09	3.54473	10.1559	36	0.000879605	0.00311796	5636	0.326953	1	0.548209	1.74303	1.14743	2	3	0.000261506	0.666667	unnamed,unnamed,unnamed,unnamed,unnamed,unnamed,unnamed,unnamed,unnamed,unnamed,unnamed,unnamed,unnamed,unnamed,unnamed,unnamed,unnamed,unnamed,unnamed,unnamed,unnamed,unnamed,unnamed,unnamed,unnamed,unnamed,unnamed,unnamed,unnamed,unnamed,unnamed,unnamed,unnamed,unnamed,unnamed,unnamed	Sptbn1,Syt1
Mouse Phenotype	MP:0011956	abnormal compensatory feeding amount	411	2.4743e-10	2.33821e-06	5.68908e-09	2.56536	22.9988	59	0.00199192	0.00510999	6868	0.478123	1	0.657871	1.06958	8.41448	9	22	0.00117678	0.409091	unnamed,unnamed,unnamed,unnamed,unnamed,unnamed,unnamed,unnamed,unnamed,unnamed,unnamed,unnamed,unnamed,unnamed,unnamed,unnamed,unnamed,unnamed,unnamed,unnamed,unnamed,unnamed,unnamed,unnamed,unnamed,unnamed,unnamed,unnamed,unnamed,unnamed,unnamed,unnamed,unnamed,unnamed,unnamed,unnamed,unnamed,unnamed,unnamed,unnamed,unnamed,unnamed,unnamed,unnamed,unnamed,unnamed,unnamed,unnamed,unnamed,unnamed…	Camkk2,Dbx1,Fasn,Mc3r,Mrap2,P2rx7,Pomc,Prkaa2,Rxfp4
Mouse Phenotype	MP:0001388	abnormal stationary movement	412	2.70322e-10	2.55454e-06	6.20034e-09	1.33701	364.246	487	0.0315474	0.0421791	400	4.91604e-07	0.00464566	1.16142e-05	1.42194	87.2046	124	228	0.0162134	0.54386	unnamed,unnamed,unnamed,unnamed,unnamed,unnamed,unnamed,unnamed,unnamed,unnamed,unnamed,unnamed,unnamed,unnamed,unnamed,unnamed,unnamed,unnamed,unnamed,unnamed,unnamed,unnamed,unnamed,unnamed,unnamed,unnamed,unnamed,unnamed,unnamed,unnamed,unnamed,unnamed,unnamed,unnamed,unnamed,unnamed,unnamed,unnamed,unnamed,unnamed,unnamed,unnamed,unnamed,unnamed,unnamed,unnamed,unnamed,unnamed,unnamed,unnamed…	Adcy5,Aff1,Ankfn1,Ap3b1,Aplp2,App,Arntl,Atf2,Atg7,Atp2a2,Atp2b2,Atp6v0a4,Avil,Bahcc1,Bdnf,Brsk2,Cacna1b,Cacna2d2,Cacnb4,Cacng2,Cadm1,Cast,Cdh23,Chd7,Chordc1,Clic5,Clstn1,Col1a1,Cplx2,Ctnna2,Ctnnb1,Dab1,Diablo,Drd1,Dst,Efnb2,Elk4,Elmod1,Eml1,Ephb2,Esrrb,Fezf2,Fign,Foxi1,Gli2,Gpm6b,Grid2,Grm7,Herc3,Hexb,Hoxb1,Hoxd10,Il6ra,Itpr1,Jag1,Kcne1,Kcnq1,Klf14,Leprotl1,Lhfpl5,Lmna,Lmx1a,Lrig3,Lrp6,Mafb,March…
Mouse Phenotype	MP:0011918	abnormal PQ interval	413	2.77968e-10	2.6268e-06	6.36029e-09	2.71785	19.5007	53	0.00168896	0.00459033	1593	0.00400054	1	0.023732	1.83018	7.64953	14	20	0.00183054	0.7	unnamed,unnamed,unnamed,unnamed,unnamed,unnamed,unnamed,unnamed,unnamed,unnamed,unnamed,unnamed,unnamed,unnamed,unnamed,unnamed,unnamed,unnamed,unnamed,unnamed,unnamed,unnamed,unnamed,unnamed,unnamed,unnamed,unnamed,unnamed,unnamed,unnamed,unnamed,unnamed,unnamed,unnamed,unnamed,unnamed,unnamed,unnamed,unnamed,unnamed,unnamed,unnamed,unnamed,unnamed,unnamed,unnamed,unnamed,unnamed,unnamed,unnamed…	A1cf,Arhgap33,Btbd9,Cacna1g,Cap2,Cldn19,Ghrhr,Gja5,Gjc1,Gjd3,Nkx2-5,Scn5a,Sorbs2,Tbx5
Mouse Phenotype	MP:0004858	abnormal nervous system regeneration	414	2.78887e-10	2.63548e-06	6.36589e-09	2.32394	30.5515	71	0.00264607	0.00614932	1913	0.00804118	1	0.0397225	1.67331	9.56191	16	25	0.00209205	0.64	unnamed,unnamed,unnamed,unnamed,unnamed,unnamed,unnamed,unnamed,unnamed,unnamed,unnamed,unnamed,unnamed,unnamed,unnamed,unnamed,unnamed,unnamed,unnamed,unnamed,unnamed,unnamed,unnamed,unnamed,unnamed,unnamed,unnamed,unnamed,unnamed,unnamed,unnamed,unnamed,unnamed,unnamed,unnamed,unnamed,unnamed,unnamed,unnamed,unnamed,unnamed,unnamed,unnamed,unnamed,unnamed,unnamed,unnamed,unnamed,unnamed,unnamed…	Avil,Gal,Lamc1,Large1,Nos1,Nos2,Ntrk2,Ptprf,Ptprs,Rtn4,Rtn4r,Rtn4rl1,Rtn4rl2,Scyl1,St8sia1,Tnfrsf1a
Mouse Phenotype	MP:0010874	abnormal bone volume	415	2.8453e-10	2.68881e-06	6.47905e-09	1.44832	214.732	311	0.0185979	0.0269357	296	4.33874e-08	0.000410011	1.38517e-06	1.54641	62.7261	97	164	0.012683	0.591463	unnamed,unnamed,unnamed,unnamed,unnamed,unnamed,unnamed,unnamed,unnamed,unnamed,unnamed,unnamed,unnamed,unnamed,unnamed,unnamed,unnamed,unnamed,unnamed,unnamed,unnamed,unnamed,unnamed,unnamed,unnamed,unnamed,unnamed,unnamed,unnamed,unnamed,unnamed,unnamed,unnamed,unnamed,unnamed,unnamed,unnamed,unnamed,unnamed,unnamed,unnamed,unnamed,unnamed,unnamed,unnamed,unnamed,unnamed,unnamed,unnamed,unnamed…	Adrb2,Ank,Atp6v1h,Bmp1,Camk4,Ccr2,Cd44,Cd47,Cebpb,Chsy1,Cldn18,Clec11a,Col1a1,Cry2,Csf1,Cst10,Ctnnb1,Ctsk,Dicer1,Dkk1,Epas1,Esrra,Fam20c,Fermt2,Fig4,Fos,Fosl2,Fzd9,Galnt3,Gpr65,Grem1,Gsk3b,Hcst,Hivep3,Igf1r,Il20ra,Inpp5d,Itgb3,Jak1,Jdp2,Kitl,Klf10,Kremen1,Lifr,Lmna,Mcph1,Mfap2,Mfap5,Ncoa1,Ncor2,Nf1,Nfatc1,Nos1,Nos2,Notch2,Nov,Npy,Npy2r,P3h1,Pax8,Per2,Pitx1,Pkd1,Plcg2,Postn,Ppard,Pparg,Ptpre,Rassf…
Mouse Phenotype	MP:0000818	abnormal amygdala morphology	416	2.88218e-10	2.72366e-06	6.54725e-09	3.00563	14.9719	45	0.00129672	0.00389745	3937	0.119995	1	0.288024	1.49402	5.35467	8	14	0.00104602	0.571429	unnamed,unnamed,unnamed,unnamed,unnamed,unnamed,unnamed,unnamed,unnamed,unnamed,unnamed,unnamed,unnamed,unnamed,unnamed,unnamed,unnamed,unnamed,unnamed,unnamed,unnamed,unnamed,unnamed,unnamed,unnamed,unnamed,unnamed,unnamed,unnamed,unnamed,unnamed,unnamed,unnamed,unnamed,unnamed,unnamed,unnamed,unnamed,unnamed,unnamed,unnamed,unnamed,unnamed,unnamed,unnamed	Faah,Manba,Naglu,Nr2e1,Ntrk2,Shank3,Tbr1,Zic2
Mouse Phenotype	MP:0013189	abnormal exploration in a new environment	417	2.90743e-10	2.74752e-06	6.58878e-09	1.37379	299.901	412	0.0259744	0.0356834	634	1.96724e-05	0.185905	0.000293225	1.38983	72.6705	101	190	0.0132061	0.531579	unnamed,unnamed,unnamed,unnamed,unnamed,unnamed,unnamed,unnamed,unnamed,unnamed,unnamed,unnamed,unnamed,unnamed,unnamed,unnamed,unnamed,unnamed,unnamed,unnamed,unnamed,unnamed,unnamed,unnamed,unnamed,unnamed,unnamed,unnamed,unnamed,unnamed,unnamed,unnamed,unnamed,unnamed,unnamed,unnamed,unnamed,unnamed,unnamed,unnamed,unnamed,unnamed,unnamed,unnamed,unnamed,unnamed,unnamed,unnamed,unnamed,unnamed…	9930012K11Rik,Aaas,Abca13,Adcyap1,Aldob,App,Arhgef9,Arsg,Atp1a1,Atxn1,Bcl7a,Bdnf,Brinp1,Btbd16,Cadps2,Car7,Chrna4,Ckb,Cnr1,Cplx2,Dact2,Disc1,Dmxl2,Dnmt3a,Drd4,Dst,Dync1li1,Dyrk1a,Eml2,Emx1,Erc2,Esr2,Fosb,Frmd4b,Gdpd5,Gria1,Gria2,Grid2,Grin1,Grin2a,Grm1,Gsk3b,Gtf2i,Haao,Hrh1,Htr4,Htr5a,Igf2bp1,Igfbp7,Il12rb1,Jph3,Kcnc1,Lrrtm1,Lsamp,Lypd6b,Map1b,Mapk8ip2,Mthfd1,Mylip,Nav2,Nek10,Npas3,Npy,Nr2e1,Nxn,…
Mouse Phenotype	MP:0002673	abnormal sperm number	418	2.99799e-10	2.8331e-06	6.77775e-09	1.31449	411.565	541	0.0356457	0.0468561	3307	0.0690223	1	0.197236	1.09519	157.963	173	413	0.0226203	0.418886	unnamed,unnamed,unnamed,unnamed,unnamed,unnamed,unnamed,unnamed,unnamed,unnamed,unnamed,unnamed,unnamed,unnamed,unnamed,unnamed,unnamed,unnamed,unnamed,unnamed,unnamed,unnamed,unnamed,unnamed,unnamed,unnamed,unnamed,unnamed,unnamed,unnamed,unnamed,unnamed,unnamed,unnamed,unnamed,unnamed,unnamed,unnamed,unnamed,unnamed,unnamed,unnamed,unnamed,unnamed,unnamed,unnamed,unnamed,unnamed,unnamed,unnamed…	4930447C04Rik,Adamts2,Adipor2,Agps,Agtpbp1,Alk,Alpl,Apaf1,Apob,Ar,Atn1,Baz1a,Bcl2l1,Bcl2l11,Best1,Brip1,Bscl2,Btrc,Bub1b,Cadm1,Camk4,Capza3,Ccdc42,Ccna1,Cdk4,Cdkn2a,Celf3,Cfap54,Chd5,Cib1,Cks2,Clcn2,Cldn11,Csf1,Csf1r,Cstf2t,Dazl,Ddhd1,Defb41,Dhh,Dicer1,Dmc1,Dnmt3a,E2f6,Egr1,Eif4g3,Elmo1,Eno4,Ephb6,Esr1,Esr2,Etv5,Fancc,Fasl,Fkbp4,Fkbp6,Fos,Fshr,Fyn,Fzd3,Gal3st1,Galnt3,Gja1,Gorasp2,Gtf2a1,Hip1,Hmga…
Mouse Phenotype	MP:0000609	abnormal liver physiology	419	2.99945e-10	2.83448e-06	6.76487e-09	1.31449	411.566	541	0.0356458	0.0468561	402	4.97644e-07	0.00470273	1.16983e-05	1.30727	160.64	210	420	0.0274582	0.5	unnamed,unnamed,unnamed,unnamed,unnamed,unnamed,unnamed,unnamed,unnamed,unnamed,unnamed,unnamed,unnamed,unnamed,unnamed,unnamed,unnamed,unnamed,unnamed,unnamed,unnamed,unnamed,unnamed,unnamed,unnamed,unnamed,unnamed,unnamed,unnamed,unnamed,unnamed,unnamed,unnamed,unnamed,unnamed,unnamed,unnamed,unnamed,unnamed,unnamed,unnamed,unnamed,unnamed,unnamed,unnamed,unnamed,unnamed,unnamed,unnamed,unnamed…	Abcb10,Abcb11,Abcg5,Abhd5,Acaca,Acox1,Ada,Adamts7,Adar,Alb,Aldob,Amfr,Angptl3,Ank1,Apc,Apoa1,Asgr1,Atf2,Atg7,Atp8b1,Atxn2,B9d2,Bicc1,Bin3,C1qtnf9,C3ar1,C4b,Casp8,Ccng1,Ccr2,Cd44,Cdk4,Cdkn2a,Cebpb,Chd2,Clcn3,Col1a1,Csf1,Csnk1a1,Ctnnb1,Cygb,Cyp8b1,Cys1,Dbi,Degs1,Dicer1,Dio3,Drosha,Dtx1,Efs,Egr1,Elovl5,Elovl6,Epor,Esr1,Fan1,Fancc,Fasl,Fech,Fn1,Fth1,Gba,Gjb1,Gpam,Grn,Gtf2ird1,Gys2,Habp2,Hgd,Hgf,Hmgcr…
Mouse Phenotype	MP:0002644	decreased circulating triglyceride level	420	3.04517e-10	2.87768e-06	6.85163e-09	1.45502	208.245	303	0.0180361	0.0262429	1878	0.00770203	1	0.0387562	1.20421	92.1768	111	241	0.0145136	0.460581	unnamed,unnamed,unnamed,unnamed,unnamed,unnamed,unnamed,unnamed,unnamed,unnamed,unnamed,unnamed,unnamed,unnamed,unnamed,unnamed,unnamed,unnamed,unnamed,unnamed,unnamed,unnamed,unnamed,unnamed,unnamed,unnamed,unnamed,unnamed,unnamed,unnamed,unnamed,unnamed,unnamed,unnamed,unnamed,unnamed,unnamed,unnamed,unnamed,unnamed,unnamed,unnamed,unnamed,unnamed,unnamed,unnamed,unnamed,unnamed,unnamed,unnamed…	3110079O15Rik,Abhd5,Adipor2,Agap2,Angptl3,Apob,Apobec1,Aqp11,Arhgef4,Arntl,Arrdc3,Asxl1,Bag3,Bscl2,Cacna1b,Cap2,Cd84,Cebpb,Chrm3,Cldn19,Cmtm5,Crat,Crhr2,Ctage5,Cystm1,D630045J12Rik,Dclk1,Dhcr24,Diaph3,Dll1,Dpp9,Dusp1,E2f1,E2f3,Elk4,Elmod1,Fabp5,Fam234b,Fgf23,Foxo1,G6pc2,Gab1,Gatm,Gc,Gpam,Grin2d,Hif1an,Hmgcr,Hpn,Hsd11b1,Hsd3b7,Inppl1,Insig1,Insig2,Insr,Irs1,Irs2,Irs3,Klhl3,Ldlr,Lep,Lmna,Lpin2,Lrp1…
Mouse Phenotype	MP:0005153	abnormal B cell proliferation	421	3.09066e-10	2.92067e-06	6.93746e-09	1.45285	209.933	305	0.0181823	0.0264161	489	2.14873e-06	0.0203055	4.15246e-05	1.44153	70.7582	102	185	0.0133368	0.551351	unnamed,unnamed,unnamed,unnamed,unnamed,unnamed,unnamed,unnamed,unnamed,unnamed,unnamed,unnamed,unnamed,unnamed,unnamed,unnamed,unnamed,unnamed,unnamed,unnamed,unnamed,unnamed,unnamed,unnamed,unnamed,unnamed,unnamed,unnamed,unnamed,unnamed,unnamed,unnamed,unnamed,unnamed,unnamed,unnamed,unnamed,unnamed,unnamed,unnamed,unnamed,unnamed,unnamed,unnamed,unnamed,unnamed,unnamed,unnamed,unnamed,unnamed…	Arhgef1,Arhgef6,Bank1,Bcl2,Bcl2l11,Birc3,Bub1b,Casp8,Ccnd3,Cd22,Cd300c2,Cd40,Cd6,Cd74,Cd81,Chrnb2,Cmah,Ctnnbl1,Dapp1,Dock2,Dtx1,Ebf1,Fasl,Fli1,Gabpb2,Gimap5,Grb2,Hrh1,Id3,Ikzf1,Ikzf3,Inpp5d,Irf2,Irf4,Lgals9,Ly86,Lyn,Mag,Map3k14,Map3k7,Mark2,Mertk,Mfng,Myc,Ncoa3,Nfatc1,Nfkb1,Nfkb2,Nfkbia,Pawr,Peli1,Pgap3,Pik3ap1,Pik3cd,Pik3r1,Pim1,Pkn1,Plcg2,Plcl2,Pparg,Ppp2r3c,Prkcb,Pten,Ptpn6,Ptprc,Rassf5,Rela,R…
Mouse Phenotype	MP:0002693	abnormal pancreas physiology	422	3.13243e-10	2.96015e-06	7.01457e-09	1.3208	395.973	523	0.0342952	0.0452971	496	2.40178e-06	0.0226968	4.57597e-05	1.33688	118.185	158	309	0.020659	0.511327	unnamed,unnamed,unnamed,unnamed,unnamed,unnamed,unnamed,unnamed,unnamed,unnamed,unnamed,unnamed,unnamed,unnamed,unnamed,unnamed,unnamed,unnamed,unnamed,unnamed,unnamed,unnamed,unnamed,unnamed,unnamed,unnamed,unnamed,unnamed,unnamed,unnamed,unnamed,unnamed,unnamed,unnamed,unnamed,unnamed,unnamed,unnamed,unnamed,unnamed,unnamed,unnamed,unnamed,unnamed,unnamed,unnamed,unnamed,unnamed,unnamed,unnamed…	Abcc8,Adrb2,Ago2,Ahcyl1,Akap5,Alb,Aldh1b1,Ank2,Anxa7,Aqp12,Arfgef3,Arntl,Atf6,Atxn2,Bad,Bhlha15,C1qtnf9,Cacna1d,Cacna1e,Cadm1,Cadps,Cadps2,Cartpt,Ccdc80,Cck,Cd28,Cd40lg,Cdkal1,Cebpb,Cftr,Chgb,Chrm3,Clec16a,Clic4,Col1a1,Ctla4,Ctnnb1,Ctsb,Ctss,Dpp4,E2f1,Esr2,Extl3,Fasn,Fem1b,Ffar2,Ffar3,Foxa2,Foxo1,Foxo3,Gad2,Gadd45gip1,Gal,Gipr,Glis3,Glp1r,Gnao1,Gper1,Gpr68,Grb10,Hes1,Hhip,Hipk3,Hmga1,Hmgb1,Homer1…
Mouse Phenotype	MP:0004792	abnormal synaptic vesicle number	423	3.1734e-10	2.99886e-06	7.08951e-09	1.73504	86.4535	150	0.00748775	0.0129915	428	7.85455e-07	0.00742255	1.73424e-05	1.87458	20.2712	38	53	0.00496862	0.716981	unnamed,unnamed,unnamed,unnamed,unnamed,unnamed,unnamed,unnamed,unnamed,unnamed,unnamed,unnamed,unnamed,unnamed,unnamed,unnamed,unnamed,unnamed,unnamed,unnamed,unnamed,unnamed,unnamed,unnamed,unnamed,unnamed,unnamed,unnamed,unnamed,unnamed,unnamed,unnamed,unnamed,unnamed,unnamed,unnamed,unnamed,unnamed,unnamed,unnamed,unnamed,unnamed,unnamed,unnamed,unnamed,unnamed,unnamed,unnamed,unnamed,unnamed…	Bsn,Cacng2,Cadps,Camk2a,Dnajc6,Dnm1,Dnm3,Erc2,Fgfr2,Kif1a,Kif1b,Lmx1a,Lmx1b,Madd,Map6,Napa,Napb,Nbea,Pacsin1,Pcdh17,Pfn2,Pten,Ptf1a,Rims1,Rims2,Sh3gl2,Sh3gl3,Sirpa,Slc17a6,Slc17a7,Slc6a3,Ston2,Stx1a,Stx1b,Syn2,Tnr,Unc13a,Unc13b
Mouse Phenotype	MP:0013293	embryonic lethality prior to tooth bud stage	424	3.21447e-10	3.03767e-06	7.16432e-09	1.22808	736.92	905	0.0638247	0.0783821	1419	0.00236139	1	0.0157259	1.12606	309.041	348	808	0.0455021	0.430693	unnamed,unnamed,unnamed,unnamed,unnamed,unnamed,unnamed,unnamed,unnamed,unnamed,unnamed,unnamed,unnamed,unnamed,unnamed,unnamed,unnamed,unnamed,unnamed,unnamed,unnamed,unnamed,unnamed,unnamed,unnamed,unnamed,unnamed,unnamed,unnamed,unnamed,unnamed,unnamed,unnamed,unnamed,unnamed,unnamed,unnamed,unnamed,unnamed,unnamed,unnamed,unnamed,unnamed,unnamed,unnamed,unnamed,unnamed,unnamed,unnamed,unnamed…	A1cf,Aatf,Acaca,Actg1,Acvr1,Acvr1b,Adamts9,Adar,Adnp,Ago2,Ahctf1,Ahcy,Akap10,Alppl2,Apbb2,Apc,Arc,Arfgef2,Arid1a,Arid3a,Armc7,Arnt2,Arpc3,Ascc2,Asf1a,Atad3a,Atf1,Atoh8,Atp2a2,Atp5b,Atp6v0a1,Atp6v0c,Atp6v1c1,Atxn10,B3galnt1,Bap1,Bmp4,Bmp5,Bptf,Brk1,Bub1b,Bub3,Bysl,Capn2,Ccnk,Cdc42,Cdc73,Cdca8,Cdipt,Cdk12,Cdk8,Cenpo,Cep164,Cflar,Chchd3,Chd4,Chmp4b,Chmp6,Cinp,Clns1a,Cnnm2,Coa5,Coq2,Cox4i1,Cript,Cse1…
Mouse Phenotype	MP:0001360	abnormal social investigation	425	3.22733e-10	3.04983e-06	7.17606e-09	1.47498	191.868	283	0.0166177	0.0245106	326	9.88753e-08	0.000934371	2.86617e-06	1.64881	42.4549	70	111	0.00915272	0.630631	unnamed,unnamed,unnamed,unnamed,unnamed,unnamed,unnamed,unnamed,unnamed,unnamed,unnamed,unnamed,unnamed,unnamed,unnamed,unnamed,unnamed,unnamed,unnamed,unnamed,unnamed,unnamed,unnamed,unnamed,unnamed,unnamed,unnamed,unnamed,unnamed,unnamed,unnamed,unnamed,unnamed,unnamed,unnamed,unnamed,unnamed,unnamed,unnamed,unnamed,unnamed,unnamed,unnamed,unnamed,unnamed,unnamed,unnamed,unnamed,unnamed,unnamed…	3110043O21Rik,Apba2,Arhgap32,Atg7,Avpr1a,Brinp1,Cadps2,Chrnb2,Cntnap2,Crebbp,Crebrf,Crhr2,Ctnnb1,Disc1,Dlg4,Efna3,Emx1,En2,Esr1,Ext1,Gnao1,Gria1,Grin1,Grin2b,Grn,Gsk3b,Itpr3,Lrfn2,Lrrtm1,Map6,Mapk1,Mapk8ip2,Mchr1,Mdk,Nat8l,Nbea,Neurod6,Nlgn2,Nlgn3,Npas3,Nrcam,Nrxn2,Numb,Numbl,Oprm1,Pcdh9,Pde10a,Pde11a,Ppp3r1,Prex1,Prss12,Pten,Ptger1,Rnf180,Shank2,Shank3,Srgap3,Srr,Stx1a,Syn1,Syn2,Syn3,Syngap1,Tbr…
Mouse Phenotype	MP:0000137	abnormal vertebrae morphology	426	3.31576e-10	3.1334e-06	7.35539e-09	1.22527	752.487	922	0.065173	0.0798545	343	1.56809e-07	0.00148185	4.32025e-06	1.27493	216.482	276	566	0.0360879	0.487633	unnamed,unnamed,unnamed,unnamed,unnamed,unnamed,unnamed,unnamed,unnamed,unnamed,unnamed,unnamed,unnamed,unnamed,unnamed,unnamed,unnamed,unnamed,unnamed,unnamed,unnamed,unnamed,unnamed,unnamed,unnamed,unnamed,unnamed,unnamed,unnamed,unnamed,unnamed,unnamed,unnamed,unnamed,unnamed,unnamed,unnamed,unnamed,unnamed,unnamed,unnamed,unnamed,unnamed,unnamed,unnamed,unnamed,unnamed,unnamed,unnamed,unnamed…	Abca4,Actl10,Acvr1,Adamts3,Aff3,Antxr1,Ap2a2,Apaf1,Arid5b,Arl4d,Arl8b,Arntl,Arpc1b,Asxl1,Asxl2,Atp2b1,Atp5b,Bmp4,Bmp5,Bmp7,Bmper,Boc,Brd7,Btbd9,Btg2,Cacna1s,Cacna2d2,Ccdc33,Cdk14,Cdkn1c,Cdon,Chd7,Chst11,Cir1,Cmip,Cnot4,Coa5,Cog6,Col10a1,Col12a1,Col1a1,Col4a3bp,Crebbp,Crtc3,Ctbp2,Ctdspl,Ctnnb1,Ctsk,Cyp26a1,Dact1,Dbn1,Dcbld2,Dctn1,Deaf1,Dll1,Dmrt2,Dph6,Dpyd,Dusp4,Dym,E2f6,Efna1,Elmo1,Enpp1,Entpd1,E…
Mouse Phenotype	MP:0001005	abnormal retinal rod cell morphology	427	3.69395e-10	3.49079e-06	8.17515e-09	1.76056	80.6561	142	0.00698563	0.0122986	3727	0.0842121	1	0.213524	1.22012	28.6857	35	75	0.00457636	0.466667	unnamed,unnamed,unnamed,unnamed,unnamed,unnamed,unnamed,unnamed,unnamed,unnamed,unnamed,unnamed,unnamed,unnamed,unnamed,unnamed,unnamed,unnamed,unnamed,unnamed,unnamed,unnamed,unnamed,unnamed,unnamed,unnamed,unnamed,unnamed,unnamed,unnamed,unnamed,unnamed,unnamed,unnamed,unnamed,unnamed,unnamed,unnamed,unnamed,unnamed,unnamed,unnamed,unnamed,unnamed,unnamed,unnamed,unnamed,unnamed,unnamed,unnamed…	Agtpbp1,Aipl1,Atoh7,Bsn,Cln8,Cnga3,Crb2,Cry2,Ctnna1,E2f3,Egflam,Elovl4,Erc2,Fos,Gja10,Lpcat1,Mef2d,Mertk,Mfsd2a,Mitf,Nrl,Ntrk2,Pde6b,Prph2,Rb1,Rd3,Rho,Rp1,Rpe65,Sag,Sema4a,Slc24a1,Spata7,Tlr4,Tyro3
Mouse Phenotype	MP:0003562	abnormal pancreatic beta cell physiology	428	3.73741e-10	3.53186e-06	8.252e-09	1.38279	283.485	392	0.0245527	0.0339511	828	0.000106957	1	0.0012207	1.33947	77.6427	104	203	0.0135983	0.512315	unnamed,unnamed,unnamed,unnamed,unnamed,unnamed,unnamed,unnamed,unnamed,unnamed,unnamed,unnamed,unnamed,unnamed,unnamed,unnamed,unnamed,unnamed,unnamed,unnamed,unnamed,unnamed,unnamed,unnamed,unnamed,unnamed,unnamed,unnamed,unnamed,unnamed,unnamed,unnamed,unnamed,unnamed,unnamed,unnamed,unnamed,unnamed,unnamed,unnamed,unnamed,unnamed,unnamed,unnamed,unnamed,unnamed,unnamed,unnamed,unnamed,unnamed…	Abcc8,Adrb2,Ago2,Akap5,Alb,Aldh1b1,Ank2,Anxa7,Arfgef3,Arntl,Atxn2,Bad,C1qtnf9,Cacna1d,Cacna1e,Cadm1,Cadps,Cadps2,Cartpt,Ccdc80,Cdkal1,Cebpb,Chgb,Chrm3,Clec16a,Col1a1,Dpp4,E2f1,Esr2,Extl3,Fasn,Fem1b,Ffar2,Ffar3,Foxa2,Foxo1,Foxo3,Gadd45gip1,Gal,Glis3,Gnao1,Gper1,Gpr68,Grb10,Hhip,Hipk3,Hmga1,Ifng,Il6ra,Insr,Irs1,Irs2,Itpr1,Kcnb1,Kl,Lep,Lpin1,Madd,Mafa,Mapk8,Mapk9,Mpg,Nampt,Neurog3,Nkx2-2,Nkx6-1,Nr2f…
Mouse Phenotype	MP:0003884	decreased macrophage cell number	429	3.84235e-10	3.63103e-06	8.46393e-09	1.52396	158.796	242	0.0137534	0.0209596	378	3.73342e-07	0.00352808	9.33355e-06	1.56092	51.2518	80	134	0.0104603	0.597015	unnamed,unnamed,unnamed,unnamed,unnamed,unnamed,unnamed,unnamed,unnamed,unnamed,unnamed,unnamed,unnamed,unnamed,unnamed,unnamed,unnamed,unnamed,unnamed,unnamed,unnamed,unnamed,unnamed,unnamed,unnamed,unnamed,unnamed,unnamed,unnamed,unnamed,unnamed,unnamed,unnamed,unnamed,unnamed,unnamed,unnamed,unnamed,unnamed,unnamed,unnamed,unnamed,unnamed,unnamed,unnamed,unnamed,unnamed,unnamed,unnamed,unnamed…	Actl6a,Ankrd11,Apc,Arg1,Arhgap15,Birc3,C3ar1,Camk4,Ccbe1,Ccl2,Ccr2,Cd47,Cebpb,Cflar,Chek2,Col10a1,Csf1,Csf1r,Ctnnb1,Cxcl14,Ddr1,Dmd,Esrra,Fcgr4,Fgfr2,Fos,Gab2,Gmds,Gpr68,Hcst,Hivep3,Hmgb1,Hsd11b1,Igf1r,Irf8,Itgam,Itgb3,Kl,Kmt2e,Ldlr,Lyst,Mapk8,Mapk9,Mapkapk2,Mbl2,Mc4r,Mdk,Mfap2,Mfng,Mitf,Msi2,Msx2,Nfatc1,Nfkb1,Nfkb2,Nos2,Npy2r,Nr3c1,Pik3cg,Plcg2,Pparg,Ptn,Rassf2,Rgs10,Rgs12,Riox1,Riox2,Sh3bp2,Smc…
Mouse Phenotype	MP:0000778	abnormal nervous system tract morphology	430	3.85796e-10	3.64577e-06	8.47853e-09	1.31244	411.449	540	0.0356356	0.0467694	71	1.01884e-15	9.62801e-12	1.35606e-13	1.7062	81.4675	139	213	0.0181747	0.652582	unnamed,unnamed,unnamed,unnamed,unnamed,unnamed,unnamed,unnamed,unnamed,unnamed,unnamed,unnamed,unnamed,unnamed,unnamed,unnamed,unnamed,unnamed,unnamed,unnamed,unnamed,unnamed,unnamed,unnamed,unnamed,unnamed,unnamed,unnamed,unnamed,unnamed,unnamed,unnamed,unnamed,unnamed,unnamed,unnamed,unnamed,unnamed,unnamed,unnamed,unnamed,unnamed,unnamed,unnamed,unnamed,unnamed,unnamed,unnamed,unnamed,unnamed…	Abi2,Akt3,Ank2,Ap3b1,Apbb1,Apbb2,App,Arhgap5,Atoh7,Bhlhe22,Cables1,Cacnb3,Cd81,Cdh11,Cdh2,Cdk5r1,Celsr3,Chd7,Chn1,Clcn2,Clip2,Cnp,Cntn2,Cntnap2,Csf1r,Ctnnb1,Dag1,Dcc,Dclk1,Dmrta2,Ebf1,Efnb2,Egr2,Emx1,Emx2,En1,Enah,Eomes,Epha4,Epha8,Ephb2,Ephb3,Ext1,Fbxo45,Fezf2,Fgfr1,Fgfr2,Foxc1,Foxg1,Fyn,Fzd3,Galc,Gap43,Gli3,Gpm6b,Isl1,Islr2,Itpr3,Itsn1,Kif1b,Kif3a,Klf7,Ldlr,Lhx5,Lrp2,Macf1,Man2c1,Map1b,Map2,Map…
Mouse Phenotype	MP:0004901	decreased male germ cell number	431	3.93347e-10	3.71712e-06	8.62442e-09	1.30389	432.553	564	0.0374634	0.0488481	3792	0.0961495	1	0.239613	1.08273	162.553	176	425	0.0230125	0.414118	unnamed,unnamed,unnamed,unnamed,unnamed,unnamed,unnamed,unnamed,unnamed,unnamed,unnamed,unnamed,unnamed,unnamed,unnamed,unnamed,unnamed,unnamed,unnamed,unnamed,unnamed,unnamed,unnamed,unnamed,unnamed,unnamed,unnamed,unnamed,unnamed,unnamed,unnamed,unnamed,unnamed,unnamed,unnamed,unnamed,unnamed,unnamed,unnamed,unnamed,unnamed,unnamed,unnamed,unnamed,unnamed,unnamed,unnamed,unnamed,unnamed,unnamed…	4930447C04Rik,Adamts2,Adipor2,Agps,Agtpbp1,Alpl,Apaf1,Apob,Ar,Baz1a,Bcl2l1,Bcl2l11,Bmp8b,Brip1,Bscl2,Btrc,Bub1b,Cadm1,Camk4,Ccdc155,Ccdc42,Ccna1,Cdk4,Celf3,Cfap54,Chd5,Cib1,Cit,Cks2,Clcn2,Cldn11,Csf1,Csf1r,Cstf2t,Dazl,Ddhd1,Defb41,Dhh,Dicer1,Dmc1,Dmrt1,Dnmt3a,E2f6,Egr1,Eif4g3,Elmo1,Eno4,Esr1,Esr2,Etv5,Faap20,Fancc,Fkbp4,Fkbp6,Fshr,Fyn,Fzd3,Gal3st1,Galnt3,Gja1,Gorasp2,Gtf2a1,Hip1,Hmga1,Hmga2,Horma…
[truncated: 73 more rows]
